# Supplementary material for: Comprehensive Phenotypic Characterization of Human Invasive Lobular Carcinoma Cell Lines in 2D and 3D Cultures
Source: Oxford University Press journal article supplement (doi:10.1158/0008-5472.can-18-1416), 2018-09-18
Supplement: 00085472can181416-sup-201487_2_supp_5018229_ppspbp.xls [file 00085472can181416-sup-201487_2_supp_5018229_ppspbp.xls]

## Sheet: Pathways up in ILC vs IDC 
Supplementary Table 3.
List of significantly upregulated pathways in ILC vs IDC cell lines
	Pathway	Path_pval	Path_qval	TotalNumOfDEGenes	NumOfGenesInPath	NumOfDEGenesInPath	DEgenes
REACTOME_POTASSIUM_CHANNELS	REACTOME_POTASSIUM_CHANNELS	1.11406e-07	0.000261358	320	98	8	ABCC8	KCNC1	KCNC2	KCND3	KCNH7	KCNJ1	KCNK3	KCNQ3
ION_CHANNEL_ACTIVITY	ION_CHANNEL_ACTIVITY	2.4714e-06	0.00113908	320	147	8	CACNA1C	CHRNB2	CLCA2	KCNC1	KCND3	KCNJ1	KCNK3	KCNQ3
KEGG_PHENYLALANINE_METABOLISM	KEGG_PHENYLALANINE_METABOLISM	3.10128e-06	0.00113908	320	18	4	ALDH3B2	DDC	MAOB	TAT
KEGG_TYROSINE_METABOLISM	KEGG_TYROSINE_METABOLISM	3.88433e-06	0.00113908	320	41	5	ALDH3B2	DDC	HGD	MAOB	TAT
METAL_ION_TRANSMEMBRANE_TRANSPORTER_ACTIVITY	METAL_ION_TRANSMEMBRANE_TRANSPORTER_ACTIVITY	2.23092e-06	0.00113908	320	145	8	ABCC8	CACNA1C	CHRNB2	KCNC1	KCND3	KCNJ1	KCNK3	KCNQ3
POTASSIUM_ION_TRANSPORT	POTASSIUM_ION_TRANSPORT	9.87503e-07	0.00113908	320	57	6	ABCC8	KCNC1	KCND3	KCNJ1	KCNK3	KCNQ3
REACTOME_BIOLOGICAL_OXIDATIONS	REACTOME_BIOLOGICAL_OXIDATIONS	1.45714e-06	0.00113908	320	137	8	CYP4F3	GCLM	GSTA4	GSTM1	MAOB	PTGIS	SULT1E1	UGT1A4
SUBSTRATE_SPECIFIC_CHANNEL_ACTIVITY	SUBSTRATE_SPECIFIC_CHANNEL_ACTIVITY	3.49425e-06	0.00113908	320	154	8	CACNA1C	CHRNB2	CLCA2	KCNC1	KCND3	KCNJ1	KCNK3	KCNQ3
REACTOME_VOLTAGE_GATED_POTASSIUM_CHANNELS	REACTOME_VOLTAGE_GATED_POTASSIUM_CHANNELS	4.94257e-06	0.00128836	320	43	5	KCNC1	KCNC2	KCND3	KCNH7	KCNQ3
CATION_CHANNEL_ACTIVITY	CATION_CHANNEL_ACTIVITY	6.01093e-06	0.00141016	320	118	7	CACNA1C	CHRNB2	KCNC1	KCND3	KCNJ1	KCNK3	KCNQ3
KEGG_GLUTATHIONE_METABOLISM	KEGG_GLUTATHIONE_METABOLISM	9.51812e-06	0.00202996	320	49	5	GCLM	GPX1	GPX2	GSTA4	GSTM1
POTASSIUM_CHANNEL_ACTIVITY	POTASSIUM_CHANNEL_ACTIVITY	1.0526e-05	0.00205783	320	50	5	KCNC1	KCND3	KCNJ1	KCNK3	KCNQ3
MONOVALENT_INORGANIC_CATION_TRANSPORT	MONOVALENT_INORGANIC_CATION_TRANSPORT	1.63881e-05	0.00295742	320	92	6	ABCC8	KCNC1	KCND3	KCNJ1	KCNK3	KCNQ3
CATION_TRANSPORT	CATION_TRANSPORT	2.30549e-05	0.00386335	320	145	7	ABCC8	KCNC1	KCND3	KCNJ1	KCNK3	KCNQ3	SLC22A4
VOLTAGE_GATED_CATION_CHANNEL_ACTIVITY	VOLTAGE_GATED_CATION_CHANNEL_ACTIVITY	4.11786e-05	0.00644033	320	66	5	CACNA1C	KCNC1	KCND3	KCNJ1	KCNQ3
3_5_CYCLIC_NUCLEOTIDE_PHOSPHODIESTERASE_ACTIVITY	3_5_CYCLIC_NUCLEOTIDE_PHOSPHODIESTERASE_ACTIVITY	5.18726e-05	0.00667508	320	13	3	PDE10A	PDE4B	PDE7B
CYCLIC_NUCLEOTIDE_PHOSPHODIESTERASE_ACTIVITY	CYCLIC_NUCLEOTIDE_PHOSPHODIESTERASE_ACTIVITY	6.57379e-05	0.00667508	320	14	3	PDE10A	PDE4B	PDE7B
GATED_CHANNEL_ACTIVITY	GATED_CHANNEL_ACTIVITY	7.68232e-05	0.00667508	320	121	6	CACNA1C	CHRNB2	KCNC1	KCND3	KCNJ1	KCNQ3
KEGG_DRUG_METABOLISM_CYTOCHROME_P450	KEGG_DRUG_METABOLISM_CYTOCHROME_P450	5.85986e-05	0.00667508	320	71	5	ALDH3B2	GSTA4	GSTM1	MAOB	UGT1A4
KEGG_TRYPTOPHAN_METABOLISM	KEGG_TRYPTOPHAN_METABOLISM	7.57777e-05	0.00667508	320	39	4	ACMSD	DDC	MAOB	TDO2
METAL_ION_TRANSPORT	METAL_ION_TRANSPORT	6.07535e-05	0.00667508	320	116	6	ABCC8	KCNC1	KCND3	KCNJ1	KCNK3	KCNQ3
NEURON_DIFFERENTIATION	NEURON_DIFFERENTIATION	7.14861e-05	0.00667508	320	74	5	ATP2B2	CNTN4	NRXN1	NRXN3	RTN1
REACTOME_PHASE_II_CONJUGATION	REACTOME_PHASE_II_CONJUGATION	5.10586e-05	0.00667508	320	69	5	GCLM	GSTA4	GSTM1	SULT1E1	UGT1A4
SYNAPTIC_TRANSMISSION	SYNAPTIC_TRANSMISSION	7.08766e-05	0.00667508	320	173	7	CBLN1	CNTN4	HRH3	KCNK3	KCNQ3	NOVA1	PDE7B
VOLTAGE_GATED_CHANNEL_ACTIVITY	VOLTAGE_GATED_CHANNEL_ACTIVITY	6.69698e-05	0.00667508	320	73	5	CACNA1C	KCNC1	KCND3	KCNJ1	KCNQ3
VOLTAGE_GATED_POTASSIUM_CHANNEL_ACTIVITY	VOLTAGE_GATED_POTASSIUM_CHANNEL_ACTIVITY	5.50123e-05	0.00667508	320	36	4	KCNC1	KCND3	KCNJ1	KCNQ3
VOLTAGE_GATED_POTASSIUM_CHANNEL_COMPLEX	VOLTAGE_GATED_POTASSIUM_CHANNEL_COMPLEX	7.57777e-05	0.00667508	320	39	4	KCNC1	KCND3	KCNJ1	KCNQ3
GENERATION_OF_NEURONS	GENERATION_OF_NEURONS	0.000110026	0.00818573	320	81	5	ATP2B2	CNTN4	NRXN1	NRXN3	RTN1
ION_TRANSPORT	ION_TRANSPORT	0.000100712	0.00818573	320	183	7	ABCC8	KCNC1	KCND3	KCNJ1	KCNK3	KCNQ3	SLC22A4
KEGG_CELL_ADHESION_MOLECULES_CAMS	KEGG_CELL_ADHESION_MOLECULES_CAMS	0.000104826	0.00818573	320	128	6	CDH2	CNTNAP2	HLA-DQA2	NFASC	NRXN1	NRXN3
TRANSMEMBRANE_RECEPTOR_PROTEIN_TYROSINE_KINASE_ACTIVITY	TRANSMEMBRANE_RECEPTOR_PROTEIN_TYROSINE_KINASE_ACTIVITY	0.000111655	0.00818573	320	43	4	FGFR1	FGFR4	FLT3	ROR1
TRANSMEMBRANE_RECEPTOR_PROTEIN_TYROSINE_KINASE_SIGNALING_PATHWAY	TRANSMEMBRANE_RECEPTOR_PROTEIN_TYROSINE_KINASE_SIGNALING_PATHWAY	0.000110026	0.00818573	320	81	5	FGFR4	FLT3	PTPRT	ROR1	SHC3
TRANSMISSION_OF_NERVE_IMPULSE	TRANSMISSION_OF_NERVE_IMPULSE	0.000119065	0.00846446	320	188	7	CBLN1	CNTN4	HRH3	KCNK3	KCNQ3	NOVA1	PDE7B
REACTOME_METABOLISM_OF_AMINO_ACIDS_AND_DERIVATIVES	REACTOME_METABOLISM_OF_AMINO_ACIDS_AND_DERIVATIVES	0.000131322	0.00906118	320	191	7	ACMSD	BBOX1	DDC	GCLM	HGD	TAT	TDO2
REACTOME_REGULATION_OF_INSULIN_SECRETION	REACTOME_REGULATION_OF_INSULIN_SECRETION	0.000171683	0.011188	320	89	5	ABCC8	KCNC2	MARCKS	PRKAR2B	SNAP25
REACTOME_TRANSPORT_OF_GLUCOSE_AND_OTHER_SUGARS_BILE_SALTS_AND_ORGANIC_ACIDS_METAL_IONS_AND_AMINE_COMPOUNDS	REACTOME_TRANSPORT_OF_GLUCOSE_AND_OTHER_SUGARS_BILE_SALTS_AND_ORGANIC_ACIDS_METAL_IONS_AND_AMINE_COMPOUNDS	0.000171683	0.011188	320	89	5	HEPH	SLC22A4	SLC30A8	SLC44A4	SLC5A11
LOCOMOTORY_BEHAVIOR	LOCOMOTORY_BEHAVIOR	0.000190557	0.0117644	320	91	5	CCR2	CCR8	CX3CR1	DOCK2	NOVA1
NEUROGENESIS	NEUROGENESIS	0.000190557	0.0117644	320	91	5	ATP2B2	CNTN4	NRXN1	NRXN3	RTN1
TRANSMEMBRANE_RECEPTOR_PROTEIN_KINASE_ACTIVITY	TRANSMEMBRANE_RECEPTOR_PROTEIN_KINASE_ACTIVITY	0.000218057	0.013117	320	51	4	FGFR1	FGFR4	FLT3	ROR1
AXON_GUIDANCE	AXON_GUIDANCE	0.000233119	0.0136724	320	21	3	CNTN4	NRXN1	NRXN3
REACTOME_GLUTATHIONE_CONJUGATION	REACTOME_GLUTATHIONE_CONJUGATION	0.000307779	0.0173	320	23	3	GCLM	GSTA4	GSTM1
SKELETAL_DEVELOPMENT	SKELETAL_DEVELOPMENT	0.000309719	0.0173	320	101	5	ANKH	CLEC3B	DLL3	FGFR1	TBX3
KEGG_ARACHIDONIC_ACID_METABOLISM	KEGG_ARACHIDONIC_ACID_METABOLISM	0.000358679	0.0195688	320	58	4	CYP4F3	GPX1	GPX2	PTGIS
KEGG_HISTIDINE_METABOLISM	KEGG_HISTIDINE_METABOLISM	0.000499735	0.0260528	320	27	3	ALDH3B2	DDC	MAOB
PROTEIN_TYROSINE_KINASE_ACTIVITY	PROTEIN_TYROSINE_KINASE_ACTIVITY	0.000492336	0.0260528	320	63	4	FGFR1	FGFR4	FLT3	ROR1
GENERATION_OF_A_SIGNAL_INVOLVED_IN_CELL_CELL_SIGNALING	GENERATION_OF_A_SIGNAL_INVOLVED_IN_CELL_CELL_SIGNALING	0.000618988	0.0296356	320	29	3	HRH3	SNAP25	TBX3
REACTOME_INTEGRATION_OF_ENERGY_METABOLISM	REACTOME_INTEGRATION_OF_ENERGY_METABOLISM	0.000584685	0.0296356	320	116	5	ABCC8	KCNC2	MARCKS	PRKAR2B	SNAP25
SECRETION	SECRETION	0.000617121	0.0296356	320	178	6	CPLX2	HRH3	KCNJ1	SLC22A4	SNAP25	TBX3
TRANSFERASE_ACTIVITY_TRANSFERRING_ALKYL_OR_ARYLOTHER_THAN_METHYLGROUPS	TRANSFERASE_ACTIVITY_TRANSFERRING_ALKYL_OR_ARYLOTHER_THAN_METHYLGROUPS	0.000618988	0.0296356	320	29	3	AGPS	GSTA4	GSTM1
CENTRAL_NERVOUS_SYSTEM_DEVELOPMENT	CENTRAL_NERVOUS_SYSTEM_DEVELOPMENT	0.000656528	0.0308043	320	119	5	CNTN4	DCX	DNER	RPS6KA6	SHC3
KEGG_METABOLISM_OF_XENOBIOTICS_BY_CYTOCHROME_P450	KEGG_METABOLISM_OF_XENOBIOTICS_BY_CYTOCHROME_P450	0.000695462	0.0319913	320	69	4	ALDH3B2	GSTA4	GSTM1	UGT1A4
REACTOME_TRANSMISSION_ACROSS_CHEMICAL_SYNAPSES	REACTOME_TRANSMISSION_ACROSS_CHEMICAL_SYNAPSES	0.000733719	0.033102	320	184	6	CACNA2D3	CHRNB2	GABRB3	GRIA3	RPS6KA6	SNAP25
REACTOME_BMAL1_CLOCK_NPAS2_ACTIVATES_CIRCADIAN_EXPRESSION	REACTOME_BMAL1_CLOCK_NPAS2_ACTIVATES_CIRCADIAN_EXPRESSION	0.000992349	0.0439255	320	34	3	ARNTL	BHLHE41	RORA
REACTOME_TRYPTOPHAN_CATABOLISM	REACTOME_TRYPTOPHAN_CATABOLISM	0.00115922	0.0503617	320	9	2	ACMSD	TDO2
ENZYME_LINKED_RECEPTOR_PROTEIN_SIGNALING_PATHWAY	ENZYME_LINKED_RECEPTOR_PROTEIN_SIGNALING_PATHWAY	0.00127526	0.0534241	320	138	5	FGFR4	FLT3	PTPRT	ROR1	SHC3
SULFUR_METABOLIC_PROCESS	SULFUR_METABOLIC_PROCESS	0.0012722	0.0534241	320	37	3	CHST8	GCLM	GPX1
REACTOME_L1CAM_INTERACTIONS	REACTOME_L1CAM_INTERACTIONS	0.00138802	0.0571279	320	83	4	DCX	FGFR1	KCNQ3	RPS6KA6
CELLULAR_HOMEOSTASIS	CELLULAR_HOMEOSTASIS	0.00144699	0.0576911	320	142	5	BCL2	CACNA1C	CCR2	CCR8	GPX1
REACTOME_INSULIN_RECEPTOR_SIGNALLING_CASCADE	REACTOME_INSULIN_RECEPTOR_SIGNALLING_CASCADE	0.00145088	0.0576911	320	84	4	EIF4EBP1	FGFR1	FGFR4	SHC3
PHOSPHORIC_DIESTER_HYDROLASE_ACTIVITY	PHOSPHORIC_DIESTER_HYDROLASE_ACTIVITY	0.0015972	0.0624503	320	40	3	PDE10A	PDE4B	PDE7B
AXONOGENESIS	AXONOGENESIS	0.00171599	0.0644266	320	41	3	CNTN4	NRXN1	NRXN3
BEHAVIOR	BEHAVIOR	0.00173573	0.0644266	320	148	5	CCR2	CCR8	CX3CR1	DOCK2	NOVA1
GABA_RECEPTOR_ACTIVITY	GABA_RECEPTOR_ACTIVITY	0.00175759	0.0644266	320	11	2	GABRB3	GABRD
PHOSPHORIC_ESTER_HYDROLASE_ACTIVITY	PHOSPHORIC_ESTER_HYDROLASE_ACTIVITY	0.00173573	0.0644266	320	148	5	PDE10A	PDE4B	PDE7B	PTPRN2	PTPRT
KEGG_ALDOSTERONE_REGULATED_SODIUM_REABSORPTION	KEGG_ALDOSTERONE_REGULATED_SODIUM_REABSORPTION	0.00184016	0.0664158	320	42	3	IRS4	KCNJ1	NR3C2
CELL_MIGRATION	CELL_MIGRATION	0.00194751	0.0692251	320	91	4	CNTN4	DOCK2	NRXN1	NRXN3
KEGG_TYPE_II_DIABETES_MELLITUS	KEGG_TYPE_II_DIABETES_MELLITUS	0.00239232	0.0837671	320	46	3	ABCC8	CACNA1C	IRS4
KEGG_CIRCADIAN_RHYTHM_MAMMAL	KEGG_CIRCADIAN_RHYTHM_MAMMAL	0.00247368	0.0841051	320	13	2	ARNTL	BHLHE41
REGULATION_OF_HOMEOSTATIC_PROCESS	REGULATION_OF_HOMEOSTATIC_PROCESS	0.00247368	0.0841051	320	13	2	BCL2	GPX1
CELLULAR_MORPHOGENESIS_DURING_DIFFERENTIATION	CELLULAR_MORPHOGENESIS_DURING_DIFFERENTIATION	0.00254463	0.0852815	320	47	3	CNTN4	NRXN1	NRXN3
CARBOXY_LYASE_ACTIVITY	CARBOXY_LYASE_ACTIVITY	0.002875	0.0923939	320	14	2	ACMSD	DDC
GLUTATHIONE_TRANSFERASE_ACTIVITY	GLUTATHIONE_TRANSFERASE_ACTIVITY	0.002875	0.0923939	320	14	2	GSTA4	GSTM1
TISSUE_MORPHOGENESIS	TISSUE_MORPHOGENESIS	0.002875	0.0923939	320	14	2	TBX3	TGM3
CELLULAR_CATION_HOMEOSTASIS	CELLULAR_CATION_HOMEOSTASIS	0.00327139	0.0983933	320	105	4	BCL2	CACNA1C	CCR2	CCR8
NEURITE_DEVELOPMENT	NEURITE_DEVELOPMENT	0.0032132	0.0983933	320	51	3	CNTN4	NRXN1	NRXN3
REACTOME_CHEMOKINE_RECEPTORS_BIND_CHEMOKINES	REACTOME_CHEMOKINE_RECEPTORS_BIND_CHEMOKINES	0.0032132	0.0983933	320	51	3	CCR2	CCR8	CX3CR1
REACTOME_CIRCADIAN_CLOCK	REACTOME_CIRCADIAN_CLOCK	0.0032132	0.0983933	320	51	3	ARNTL	BHLHE41	RORA
REACTOME_SIGNALING_BY_INSULIN_RECEPTOR	REACTOME_SIGNALING_BY_INSULIN_RECEPTOR	0.00327139	0.0983933	320	105	4	EIF4EBP1	FGFR1	FGFR4	SHC3
KEGG_AMYOTROPHIC_LATERAL_SCLEROSIS_ALS	KEGG_AMYOTROPHIC_LATERAL_SCLEROSIS_ALS	0.00339553	0.0995738	320	52	3	BCL2	GPX1	NEFH
REACTOME_PHOSPHOLIPASE_C_MEDIATED_CASCADE	REACTOME_PHOSPHOLIPASE_C_MEDIATED_CASCADE	0.00339553	0.0995738	320	52	3	FGFR1	FGFR4	PRKAR2B
CATION_HOMEOSTASIS	CATION_HOMEOSTASIS	0.00361864	0.104807	320	108	4	BCL2	CACNA1C	CCR2	CCR8
DENDRITE	DENDRITE	0.0037625	0.106347	320	16	2	DNER	SYNPO
REACTOME_INFLAMMASOMES	REACTOME_INFLAMMASOMES	0.0037625	0.106347	320	16	2	BCL2	NLRP1
HORMONE_SECRETION	HORMONE_SECRETION	0.004248	0.117245	320	17	2	SNAP25	TBX3
NEURON_APOPTOSIS	NEURON_APOPTOSIS	0.004248	0.117245	320	17	2	BCL2	NLRP1
KEGG_CHEMOKINE_SIGNALING_PATHWAY	KEGG_CHEMOKINE_SIGNALING_PATHWAY	0.0044221	0.120631	320	184	5	CCR2	CCR8	CX3CR1	DOCK2	SHC3
ANTI_APOPTOSIS	ANTI_APOPTOSIS	0.00452432	0.122001	320	115	4	BAG4	BCL2	GPX1	TBX3
CARBON_CARBON_LYASE_ACTIVITY	CARBON_CARBON_LYASE_ACTIVITY	0.00476089	0.126403	320	18	2	ACMSD	DDC
NEURON_DEVELOPMENT	NEURON_DEVELOPMENT	0.0048492	0.126403	320	59	3	CNTN4	NRXN1	NRXN3
REACTOME_G_ALPHA_I_SIGNALLING_EVENTS	REACTOME_G_ALPHA_I_SIGNALLING_EVENTS	0.0048396	0.126403	320	188	5	CCR2	CCR8	HRH3	RGS7	SSTR2
REACTOME_PHOSPHOLIPID_METABOLISM	REACTOME_PHOSPHOLIPID_METABOLISM	0.00494819	0.127566	320	189	5	ARSH	LPCAT2	LPCAT3	PIK3C2G	SLC44A4
MAGNESIUM_ION_BINDING	MAGNESIUM_ION_BINDING	0.00508292	0.129614	320	60	3	MARK1	MOV10L1	TGM3
CELL_PROJECTION_PART	CELL_PROJECTION_PART	0.00530084	0.132296	320	19	2	SPAG6	SYNPO
TRANSMEMBRANE_RECEPTOR_PROTEIN_PHOSPHATASE_ACTIVITY	TRANSMEMBRANE_RECEPTOR_PROTEIN_PHOSPHATASE_ACTIVITY	0.00530084	0.132296	320	19	2	PTPRN2	PTPRT
NEGATIVE_REGULATION_OF_DEVELOPMENTAL_PROCESS	NEGATIVE_REGULATION_OF_DEVELOPMENTAL_PROCESS	0.00539988	0.133349	320	193	5	BAG4	BCL2	CNTN4	GPX1	TBX3
KEGG_NEUROTROPHIN_SIGNALING_PATHWAY	KEGG_NEUROTROPHIN_SIGNALING_PATHWAY	0.00606557	0.148227	320	125	4	BCL2	IRS4	RPS6KA6	SHC3
NEURON_PROJECTION	NEURON_PROJECTION	0.00646063	0.156254	320	21	2	NEFH	SYNPO
ION_HOMEOSTASIS	ION_HOMEOSTASIS	0.00658815	0.157712	320	128	4	BCL2	CACNA1C	CCR2	CCR8
REACTOME_ACYL_CHAIN_REMODELLING_OF_PC	REACTOME_ACYL_CHAIN_REMODELLING_OF_PC	0.00707981	0.162836	320	22	2	LPCAT2	LPCAT3
REACTOME_CIRCADIAN_REPRESSION_OF_EXPRESSION_BY_REV_ERBA	REACTOME_CIRCADIAN_REPRESSION_OF_EXPRESSION_BY_REV_ERBA	0.00707981	0.162836	320	22	2	ARNTL	RORA
REACTOME_FGFR_LIGAND_BINDING_AND_ACTIVATION	REACTOME_FGFR_LIGAND_BINDING_AND_ACTIVATION	0.00707981	0.162836	320	22	2	FGFR1	FGFR4
REACTOME_METAL_ION_SLC_TRANSPORTERS	REACTOME_METAL_ION_SLC_TRANSPORTERS	0.00707981	0.162836	320	22	2	HEPH	SLC30A8
REACTOME_PI3K_CASCADE	REACTOME_PI3K_CASCADE	0.00719718	0.163928	320	68	3	EIF4EBP1	FGFR1	FGFR4
REACTOME_PHASE1_FUNCTIONALIZATION_OF_COMPOUNDS	REACTOME_PHASE1_FUNCTIONALIZATION_OF_COMPOUNDS	0.00749272	0.169018	320	69	3	CYP4F3	MAOB	PTGIS
REACTOME_RORA_ACTIVATES_CIRCADIAN_EXPRESSION	REACTOME_RORA_ACTIVATES_CIRCADIAN_EXPRESSION	0.00772477	0.172593	320	23	2	ARNTL	RORA
REACTOME_NEUROTRANSMITTER_RECEPTOR_BINDING_AND_DOWNSTREAM_TRANSMISSION_IN_THE_POSTSYNAPTIC_CELL	REACTOME_NEUROTRANSMITTER_RECEPTOR_BINDING_AND_DOWNSTREAM_TRANSMISSION_IN_THE_POSTSYNAPTIC_CELL	0.00792137	0.175316	320	135	4	CHRNB2	GABRB3	GRIA3	RPS6KA6
CALMODULIN_BINDING	CALMODULIN_BINDING	0.00839518	0.179618	320	24	2	CACNA1C	MARCKS
KEGG_INSULIN_SIGNALING_PATHWAY	KEGG_INSULIN_SIGNALING_PATHWAY	0.00833242	0.179618	320	137	4	EIF4EBP1	IRS4	PRKAR2B	SHC3
PROTEIN_DOMAIN_SPECIFIC_BINDING	PROTEIN_DOMAIN_SPECIFIC_BINDING	0.00842196	0.179618	320	72	3	BCL2	GPX1	SSTR2
REACTOME_DARPP_32_EVENTS	REACTOME_DARPP_32_EVENTS	0.00839518	0.179618	320	24	2	PDE4B	PRKAR2B
AMINE_METABOLIC_PROCESS	AMINE_METABOLIC_PROCESS	0.00897479	0.187078	320	140	4	BBOX1	GCLM	GCNT2	HGD
KEGG_ARRHYTHMOGENIC_RIGHT_VENTRICULAR_CARDIOMYOPATHY_ARVC	KEGG_ARRHYTHMOGENIC_RIGHT_VENTRICULAR_CARDIOMYOPATHY_ARVC	0.00907736	0.187078	320	74	3	CACNA1C	CACNA2D3	CDH2
LIGAND_DEPENDENT_NUCLEAR_RECEPTOR_ACTIVITY	LIGAND_DEPENDENT_NUCLEAR_RECEPTOR_ACTIVITY	0.00909073	0.187078	320	25	2	NR3C2	RARB
OUTER_MEMBRANE	OUTER_MEMBRANE	0.00909073	0.187078	320	25	2	ANKH	BCL2
ACTIN_BINDING	ACTIN_BINDING	0.00976179	0.196725	320	76	3	IQGAP2	MARCKS	SYNPO
BIOCARTA_BAD_PATHWAY	BIOCARTA_BAD_PATHWAY	0.00981111	0.196725	320	26	2	BCL2	PRKAR2B
DEVELOPMENT_OF_PRIMARY_SEXUAL_CHARACTERISTICS	DEVELOPMENT_OF_PRIMARY_SEXUAL_CHARACTERISTICS	0.00981111	0.196725	320	26	2	SOX15	TBX3
ELECTRON_CARRIER_ACTIVITY	ELECTRON_CARRIER_ACTIVITY	0.0104755	0.207172	320	78	3	AKR7A3	GPX2	MAOB
NEGATIVE_REGULATION_OF_APOPTOSIS	NEGATIVE_REGULATION_OF_APOPTOSIS	0.010597	0.207172	320	147	4	BAG4	BCL2	GPX1	TBX3
NEGATIVE_REGULATION_OF_CELL_DIFFERENTIATION	NEGATIVE_REGULATION_OF_CELL_DIFFERENTIATION	0.010556	0.207172	320	27	2	CNTN4	TBX3
NEGATIVE_REGULATION_OF_PROGRAMMED_CELL_DEATH	NEGATIVE_REGULATION_OF_PROGRAMMED_CELL_DEATH	0.0108432	0.208513	320	148	4	BAG4	BCL2	GPX1	TBX3
REACTOME_GLYCEROPHOSPHOLIPID_BIOSYNTHESIS	REACTOME_GLYCEROPHOSPHOLIPID_BIOSYNTHESIS	0.0108434	0.208513	320	79	3	LPCAT2	LPCAT3	SLC44A4
REACTOME_SHC_MEDIATED_CASCADE	REACTOME_SHC_MEDIATED_CASCADE	0.0113252	0.214265	320	28	2	FGFR1	FGFR4
SULFOTRANSFERASE_ACTIVITY	SULFOTRANSFERASE_ACTIVITY	0.0113252	0.214265	320	28	2	CHST8	SULT1E1
ATP_BINDING	ATP_BINDING	0.0118645	0.220906	320	152	4	ABCC8	MARK1	MOV10L1	NLRP1
KEGG_PURINE_METABOLISM	KEGG_PURINE_METABOLISM	0.0118645	0.220906	320	152	4	FHIT	PDE10A	PDE4B	PDE7B
NITROGEN_COMPOUND_METABOLIC_PROCESS	NITROGEN_COMPOUND_METABOLIC_PROCESS	0.0121292	0.222305	320	153	4	BBOX1	GCLM	GCNT2	HGD
RESPONSE_TO_ORGANIC_SUBSTANCE	RESPONSE_TO_ORGANIC_SUBSTANCE	0.0121182	0.222305	320	29	2	BCL2	CHRNB2
CHEMICAL_HOMEOSTASIS	CHEMICAL_HOMEOSTASIS	0.0123976	0.225463	320	154	4	BCL2	CACNA1C	CCR2	CCR8
KEGG_ETHER_LIPID_METABOLISM	KEGG_ETHER_LIPID_METABOLISM	0.0129349	0.229888	320	30	2	AGPS	LPCAT2
KEGG_SMALL_CELL_LUNG_CANCER	KEGG_SMALL_CELL_LUNG_CANCER	0.0127943	0.229888	320	84	3	BCL2	FHIT	RARB
TRANSPORT_VESICLE	TRANSPORT_VESICLE	0.0129349	0.229888	320	30	2	SSPN	SYT13
KEGG_PROGESTERONE_MEDIATED_OOCYTE_MATURATION	KEGG_PROGESTERONE_MEDIATED_OOCYTE_MATURATION	0.0132069	0.232958	320	85	3	CPEB1	RPS6KA6	SPDYC
ADENYL_RIBONUCLEOTIDE_BINDING	ADENYL_RIBONUCLEOTIDE_BINDING	0.0137964	0.234539	320	159	4	ABCC8	MARK1	MOV10L1	NLRP1
CYTOSKELETAL_PROTEIN_BINDING	CYTOSKELETAL_PROTEIN_BINDING	0.0137964	0.234539	320	159	4	DCX	IQGAP2	MARCKS	SYNPO
KEGG_APOPTOSIS	KEGG_APOPTOSIS	0.0136271	0.234539	320	86	3	BCL2	IL1R1	PRKAR2B
KEGG_ERBB_SIGNALING_PATHWAY	KEGG_ERBB_SIGNALING_PATHWAY	0.0136271	0.234539	320	86	3	EIF4EBP1	PAK6	SHC3
REACTOME_INWARDLY_RECTIFYING_K_CHANNELS	REACTOME_INWARDLY_RECTIFYING_K_CHANNELS	0.0137749	0.234539	320	31	2	ABCC8	KCNJ1
TRANSFERASE_ACTIVITY_TRANSFERRING_SULFUR_CONTAINING_GROUPS	TRANSFERASE_ACTIVITY_TRANSFERRING_SULFUR_CONTAINING_GROUPS	0.0146379	0.247054	320	32	2	CHST8	SULT1E1
ADENYL_NUCLEOTIDE_BINDING	ADENYL_NUCLEOTIDE_BINDING	0.0156025	0.259598	320	165	4	ABCC8	MARK1	MOV10L1	NLRP1
BIOCARTA_IL1R_PATHWAY	BIOCARTA_IL1R_PATHWAY	0.0155236	0.259598	320	33	2	IL1R1	IL1RN
BIOCARTA_MPR_PATHWAY	BIOCARTA_MPR_PATHWAY	0.0164318	0.269574	320	34	2	PAQR5	PRKAR2B
REACTOME_SIGNAL_TRANSDUCTION_BY_L1	REACTOME_SIGNAL_TRANSDUCTION_BY_L1	0.0164318	0.269574	320	34	2	FGFR1	RPS6KA6
OXIDOREDUCTASE_ACTIVITY_GO_0016705	OXIDOREDUCTASE_ACTIVITY_GO_0016705	0.0183145	0.292284	320	36	2	BBOX1	HMOX1
REACTOME_DOWNSTREAM_SIGNALING_OF_ACTIVATED_FGFR	REACTOME_DOWNSTREAM_SIGNALING_OF_ACTIVATED_FGFR	0.018246	0.292284	320	96	3	FGFR1	FGFR4	PRKAR2B
REACTOME_FRS2_MEDIATED_CASCADE	REACTOME_FRS2_MEDIATED_CASCADE	0.0183145	0.292284	320	36	2	FGFR1	FGFR4
REACTOME_IRON_UPTAKE_AND_TRANSPORT	REACTOME_IRON_UPTAKE_AND_TRANSPORT	0.0183145	0.292284	320	36	2	HEPH	HMOX1
COENZYME_METABOLIC_PROCESS	COENZYME_METABOLIC_PROCESS	0.0192883	0.2977	320	37	2	GCLM	GPX1
ENZYME_BINDING	ENZYME_BINDING	0.0189299	0.2977	320	175	4	BCL2	GCLM	NLRP1	SPDYC
REACTOME_ACTIVATION_OF_NMDA_RECEPTOR_UPON_GLUTAMATE_BINDING_AND_POSTSYNAPTIC_EVENTS	REACTOME_ACTIVATION_OF_NMDA_RECEPTOR_UPON_GLUTAMATE_BINDING_AND_POSTSYNAPTIC_EVENTS	0.0192883	0.2977	320	37	2	GRIA3	RPS6KA6
REACTOME_NEGATIVE_REGULATION_OF_FGFR_SIGNALING	REACTOME_NEGATIVE_REGULATION_OF_FGFR_SIGNALING	0.0192883	0.2977	320	37	2	FGFR1	FGFR4
REACTOME_PEPTIDE_LIGAND_BINDING_RECEPTORS	REACTOME_PEPTIDE_LIGAND_BINDING_RECEPTORS	0.0189299	0.2977	320	175	4	CCR2	CCR8	CX3CR1	SSTR2
CARBOXYLIC_ACID_METABOLIC_PROCESS	CARBOXYLIC_ACID_METABOLIC_PROCESS	0.019644	0.301208	320	177	4	BBOX1	CYP4F3	GCLM	HGD
AMINO_ACID_AND_DERIVATIVE_METABOLIC_PROCESS	AMINO_ACID_AND_DERIVATIVE_METABOLIC_PROCESS	0.0203076	0.30445	320	100	3	BBOX1	GCLM	HGD
G_PROTEIN_SIGNALING_COUPLED_TO_CYCLIC_NUCLEOTIDE_SECOND_MESSENGER	G_PROTEIN_SIGNALING_COUPLED_TO_CYCLIC_NUCLEOTIDE_SECOND_MESSENGER	0.0203076	0.30445	320	100	3	CCR2	HRH3	SSTR2
ORGANIC_ACID_METABOLIC_PROCESS	ORGANIC_ACID_METABOLIC_PROCESS	0.0203745	0.30445	320	179	4	BBOX1	CYP4F3	GCLM	HGD
REACTOME_NETRIN1_SIGNALING	REACTOME_NETRIN1_SIGNALING	0.0202835	0.30445	320	38	2	ABLIM3	UNC5B
CYCLIC_NUCLEOTIDE_MEDIATED_SIGNALING	CYCLIC_NUCLEOTIDE_MEDIATED_SIGNALING	0.0213844	0.315521	320	102	3	CCR2	HRH3	SSTR2
REACTOME_IL1_SIGNALING	REACTOME_IL1_SIGNALING	0.0212997	0.315521	320	39	2	IL1R1	IL1RN
KEGG_PORPHYRIN_AND_CHLOROPHYLL_METABOLISM	KEGG_PORPHYRIN_AND_CHLOROPHYLL_METABOLISM	0.0233941	0.340886	320	41	2	HMOX1	UGT1A4
KEGG_TYPE_I_DIABETES_MELLITUS	KEGG_TYPE_I_DIABETES_MELLITUS	0.0233941	0.340886	320	41	2	HLA-DQA2	PTPRN2
CELL_PROJECTION	CELL_PROJECTION	0.024211	0.350611	320	107	3	NEFH	SPAG6	SYNPO
REACTOME_REGULATION_OF_INSULIN_SECRETION_BY_GLUCAGON_LIKE_PEPTIDE1	REACTOME_REGULATION_OF_INSULIN_SECRETION_BY_GLUCAGON_LIKE_PEPTIDE1	0.0244718	0.352214	320	42	2	KCNC2	PRKAR2B
REACTOME_SIGNALING_BY_FGFR	REACTOME_SIGNALING_BY_FGFR	0.0247993	0.354752	320	108	3	FGFR1	FGFR4	PRKAR2B
DIGESTION	DIGESTION	0.0255695	0.361361	320	43	2	NPC1L1	SSTR2
REACTOME_SIGNALING_BY_FGFR_MUTANTS	REACTOME_SIGNALING_BY_FGFR_MUTANTS	0.0255695	0.361361	320	43	2	FGFR1	FGFR4
KEGG_OOCYTE_MEIOSIS	KEGG_OOCYTE_MEIOSIS	0.0259991	0.365232	320	110	3	CPEB1	RPS6KA6	SPDYC
CYTOPLASMIC_MEMBRANE_BOUND_VESICLE	CYTOPLASMIC_MEMBRANE_BOUND_VESICLE	0.0266104	0.371596	320	111	3	SSPN	SVOP	SYT13
MEMBRANE_BOUND_VESICLE	MEMBRANE_BOUND_VESICLE	0.0278561	0.384414	320	113	3	SSPN	SVOP	SYT13
REACTOME_NUCLEOTIDE_BINDING_DOMAIN_LEUCINE_RICH_REPEAT_CONTAINING_RECEPTOR_NLR_SIGNALING_PATHWAYS	REACTOME_NUCLEOTIDE_BINDING_DOMAIN_LEUCINE_RICH_REPEAT_CONTAINING_RECEPTOR_NLR_SIGNALING_PATHWAYS	0.0278236	0.384414	320	45	2	BCL2	NLRP1
CYTOPLASMIC_VESICLE	CYTOPLASMIC_VESICLE	0.0291324	0.399676	320	115	3	SSPN	SVOP	SYT13
MITOCHONDRION_ORGANIZATION_AND_BIOGENESIS	MITOCHONDRION_ORGANIZATION_AND_BIOGENESIS	0.0301545	0.406566	320	47	2	BCL2	GPX1
REACTOME_NUCLEAR_RECEPTOR_TRANSCRIPTION_PATHWAY	REACTOME_NUCLEAR_RECEPTOR_TRANSCRIPTION_PATHWAY	0.0301545	0.406566	320	47	2	NR3C2	RORA
SECONDARY_ACTIVE_TRANSMEMBRANE_TRANSPORTER_ACTIVITY	SECONDARY_ACTIVE_TRANSMEMBRANE_TRANSPORTER_ACTIVITY	0.0301545	0.406566	320	47	2	ANKH	SLC22A4
ENZYME_INHIBITOR_ACTIVITY	ENZYME_INHIBITOR_ACTIVITY	0.0311039	0.414601	320	118	3	AMBP	GPX1	IQGAP2
POSITIVE_REGULATION_OF_TRANSCRIPTIONDNA_DEPENDENT	POSITIVE_REGULATION_OF_TRANSCRIPTIONDNA_DEPENDENT	0.0311039	0.414601	320	118	3	ARNTL	RSF1	TFAP2B
CARBOHYDRATE_BIOSYNTHETIC_PROCESS	CARBOHYDRATE_BIOSYNTHETIC_PROCESS	0.031348	0.415494	320	48	2	CHST8	GCNT2
POSITIVE_REGULATION_OF_RNA_METABOLIC_PROCESS	POSITIVE_REGULATION_OF_RNA_METABOLIC_PROCESS	0.0324563	0.423014	320	120	3	ARNTL	RSF1	TFAP2B
REACTOME_G_ALPHA_S_SIGNALLING_EVENTS	REACTOME_G_ALPHA_S_SIGNALLING_EVENTS	0.0324563	0.423014	320	120	3	PDE10A	PDE4B	PDE7B
VESICLE	VESICLE	0.0324563	0.423014	320	120	3	SSPN	SVOP	SYT13
NEUROTRANSMITTER_RECEPTOR_ACTIVITY	NEUROTRANSMITTER_RECEPTOR_ACTIVITY	0.0337901	0.433805	320	50	2	CHRNB2	SSTR2
REACTOME_CYTOCHROME_P450_ARRANGED_BY_SUBSTRATE_TYPE	REACTOME_CYTOCHROME_P450_ARRANGED_BY_SUBSTRATE_TYPE	0.0337901	0.433805	320	50	2	CYP4F3	PTGIS
REACTOME_SIGNALING_BY_FGFR_IN_DISEASE	REACTOME_SIGNALING_BY_FGFR_IN_DISEASE	0.033839	0.433805	320	122	3	FGFR1	FGFR4	PRKAR2B
KEGG_MTOR_SIGNALING_PATHWAY	KEGG_MTOR_SIGNALING_PATHWAY	0.0350382	0.444322	320	51	2	EIF4EBP1	RPS6KA6
REACTOME_O_LINKED_GLYCOSYLATION_OF_MUCINS	REACTOME_O_LINKED_GLYCOSYLATION_OF_MUCINS	0.0350382	0.444322	320	51	2	GALNT13	MUCL1
ACTIN_CYTOSKELETON	ACTIN_CYTOSKELETON	0.0374274	0.456886	320	127	3	IQGAP2	MARCKS	SYNPO
COFACTOR_METABOLIC_PROCESS	COFACTOR_METABOLIC_PROCESS	0.037587	0.456886	320	53	2	GCLM	GPX1
G_PROTEIN_COUPLED_RECEPTOR_BINDING	G_PROTEIN_COUPLED_RECEPTOR_BINDING	0.037587	0.456886	320	53	2	CCR2	REEP1
KEGG_AXON_GUIDANCE	KEGG_AXON_GUIDANCE	0.0374274	0.456886	320	127	3	ABLIM3	PAK6	UNC5B
NEGATIVE_REGULATION_OF_TRANSCRIPTION_DNA_DEPENDENT	NEGATIVE_REGULATION_OF_TRANSCRIPTION_DNA_DEPENDENT	0.0374274	0.456886	320	127	3	RSF1	TBX3	ZNF177
NEUROTRANSMITTER_BINDING	NEUROTRANSMITTER_BINDING	0.037587	0.456886	320	53	2	CHRNB2	SSTR2
PROTEIN_COMPLEX_BINDING	PROTEIN_COMPLEX_BINDING	0.037587	0.456886	320	53	2	AMBP	DOCK2
PROTEIN_TYROSINE_PHOSPHATASE_ACTIVITY	PROTEIN_TYROSINE_PHOSPHATASE_ACTIVITY	0.0363039	0.456886	320	52	2	PTPRN2	PTPRT
KEGG_NON_SMALL_CELL_LUNG_CANCER	KEGG_NON_SMALL_CELL_LUNG_CANCER	0.0388873	0.463425	320	54	2	FHIT	RARB
NEGATIVE_REGULATION_OF_RNA_METABOLIC_PROCESS	NEGATIVE_REGULATION_OF_RNA_METABOLIC_PROCESS	0.0389151	0.463425	320	129	3	RSF1	TBX3	ZNF177
REACTOME_ION_CHANNEL_TRANSPORT	REACTOME_ION_CHANNEL_TRANSPORT	0.0388873	0.463425	320	54	2	ATP2B2	GABRB3
REACTOME_PI_3K_CASCADE	REACTOME_PI_3K_CASCADE	0.0388873	0.463425	320	54	2	FGFR1	FGFR4
CELLULAR_DEFENSE_RESPONSE	CELLULAR_DEFENSE_RESPONSE	0.0402046	0.473969	320	55	2	CCR2	CX3CR1
KEGG_STEROID_HORMONE_BIOSYNTHESIS	KEGG_STEROID_HORMONE_BIOSYNTHESIS	0.0402046	0.473969	320	55	2	SULT1E1	UGT1A4
KEGG_HEDGEHOG_SIGNALING_PATHWAY	KEGG_HEDGEHOG_SIGNALING_PATHWAY	0.0415385	0.487247	320	56	2	LRP2	WNT11
KEGG_ACUTE_MYELOID_LEUKEMIA	KEGG_ACUTE_MYELOID_LEUKEMIA	0.0428889	0.500584	320	57	2	EIF4EBP1	FLT3
MEMBRANE_ORGANIZATION_AND_BIOGENESIS	MEMBRANE_ORGANIZATION_AND_BIOGENESIS	0.043556	0.505853	320	135	3	BCL2	LRP2	REEP1
BIOCARTA_HIVNEF_PATHWAY	BIOCARTA_HIVNEF_PATHWAY	0.0442556	0.506457	320	58	2	BAG4	BCL2
REGULATION_OF_BINDING	REGULATION_OF_BINDING	0.0442556	0.506457	320	58	2	BCL2	RSF1
SEQUENCE_SPECIFIC_DNA_BINDING	SEQUENCE_SPECIFIC_DNA_BINDING	0.0442556	0.506457	320	58	2	TBX3	TFAP2B
ANION_TRANSMEMBRANE_TRANSPORTER_ACTIVITY	ANION_TRANSMEMBRANE_TRANSPORTER_ACTIVITY	0.0456383	0.512284	320	59	2	ANKH	CLCA2
REGULATION_OF_CELL_DIFFERENTIATION	REGULATION_OF_CELL_DIFFERENTIATION	0.0456383	0.512284	320	59	2	CNTN4	TBX3
RESPONSE_TO_RADIATION	RESPONSE_TO_RADIATION	0.0456383	0.512284	320	59	2	GPX1	XRRA1
TISSUE_DEVELOPMENT	TISSUE_DEVELOPMENT	0.0451617	0.512284	320	137	3	ANKH	TBX3	TGM3
PROTEIN_AMINO_ACID_DEPHOSPHORYLATION	PROTEIN_AMINO_ACID_DEPHOSPHORYLATION	0.0484508	0.541264	320	61	2	PTPRN2	PTPRT
POSITIVE_REGULATION_OF_TRANSCRIPTION	POSITIVE_REGULATION_OF_TRANSCRIPTION	0.0501523	0.557618	320	143	3	ARNTL	RSF1	TFAP2B
BIOCARTA_FREE_PATHWAY	BIOCARTA_FREE_PATHWAY	0.0506638	0.560648	320	9	1	GPX1
KEGG_RETINOL_METABOLISM	KEGG_RETINOL_METABOLISM	0.0513246	0.565293	320	63	2	AWAT2	UGT1A4
AMINO_ACID_DERIVATIVE_BIOSYNTHETIC_PROCESS	AMINO_ACID_DERIVATIVE_BIOSYNTHETIC_PROCESS	0.0561327	0.567618	320	10	1	BBOX1
BIOCARTA_SODD_PATHWAY	BIOCARTA_SODD_PATHWAY	0.0561327	0.567618	320	10	1	BAG4
BODY_FLUID_SECRETION	BODY_FLUID_SECRETION	0.0561327	0.567618	320	10	1	SLC22A4
COENZYME_BIOSYNTHETIC_PROCESS	COENZYME_BIOSYNTHETIC_PROCESS	0.0561327	0.567618	320	10	1	GCLM
COFACTOR_TRANSPORTER_ACTIVITY	COFACTOR_TRANSPORTER_ACTIVITY	0.0561327	0.567618	320	10	1	SLC22A4
DEFENSE_RESPONSE_TO_VIRUS	DEFENSE_RESPONSE_TO_VIRUS	0.0561327	0.567618	320	10	1	BCL2
NEGATIVE_REGULATION_OF_CATALYTIC_ACTIVITY	NEGATIVE_REGULATION_OF_CATALYTIC_ACTIVITY	0.0542579	0.567618	320	65	2	CCR2	GPX1
NUCLEOSOME_ASSEMBLY	NUCLEOSOME_ASSEMBLY	0.0561327	0.567618	320	10	1	RSF1
OXIDOREDUCTASE_ACTIVITY_GO_0016706	OXIDOREDUCTASE_ACTIVITY_GO_0016706	0.0561327	0.567618	320	10	1	BBOX1
POSITIVE_REGULATION_OF_TRANSCRIPTION_FROM_RNA_POLYMERASE_II_PROMOTER	POSITIVE_REGULATION_OF_TRANSCRIPTION_FROM_RNA_POLYMERASE_II_PROMOTER	0.0542579	0.567618	320	65	2	ARNTL	TFAP2B
REACTOME_ACETYLCHOLINE_NEUROTRANSMITTER_RELEASE_CYCLE	REACTOME_ACETYLCHOLINE_NEUROTRANSMITTER_RELEASE_CYCLE	0.0561327	0.567618	320	10	1	SNAP25
REACTOME_NOREPINEPHRINE_NEUROTRANSMITTER_RELEASE_CYCLE	REACTOME_NOREPINEPHRINE_NEUROTRANSMITTER_RELEASE_CYCLE	0.0561327	0.567618	320	10	1	SNAP25
REACTOME_PURINE_CATABOLISM	REACTOME_PURINE_CATABOLISM	0.0561327	0.567618	320	10	1	GPX1
REACTOME_REGULATION_OF_INSULIN_SECRETION_BY_ACETYLCHOLINE	REACTOME_REGULATION_OF_INSULIN_SECRETION_BY_ACETYLCHOLINE	0.0561327	0.567618	320	10	1	MARCKS
REACTOME_ROLE_OF_DCC_IN_REGULATING_APOPTOSIS	REACTOME_ROLE_OF_DCC_IN_REGULATING_APOPTOSIS	0.0561327	0.567618	320	10	1	UNC5B
REGULATION_OF_CELLULAR_PH	REGULATION_OF_CELLULAR_PH	0.0561327	0.567618	320	10	1	BCL2
RESPONSE_TO_IONIZING_RADIATION	RESPONSE_TO_IONIZING_RADIATION	0.0561327	0.567618	320	10	1	XRRA1
RESPONSE_TO_TOXIN	RESPONSE_TO_TOXIN	0.0561327	0.567618	320	10	1	BCL2
SPERMATID_DEVELOPMENT	SPERMATID_DEVELOPMENT	0.0561327	0.567618	320	10	1	SPAG6
ALDO_KETO_REDUCTASE_ACTIVITY	ALDO_KETO_REDUCTASE_ACTIVITY	0.0615702	0.5693	320	11	1	AKR7A3
APOPTOTIC_MITOCHONDRIAL_CHANGES	APOPTOTIC_MITOCHONDRIAL_CHANGES	0.0615702	0.5693	320	11	1	GPX1
ARYLSULFATASE_ACTIVITY	ARYLSULFATASE_ACTIVITY	0.0669765	0.5693	320	12	1	ARSH
AXON	AXON	0.0669765	0.5693	320	12	1	NEFH
BIOCARTA_AKAP13_PATHWAY	BIOCARTA_AKAP13_PATHWAY	0.0669765	0.5693	320	12	1	PRKAR2B
BIOCARTA_AKAP95_PATHWAY	BIOCARTA_AKAP95_PATHWAY	0.0669765	0.5693	320	12	1	PRKAR2B
BIOCARTA_CFTR_PATHWAY	BIOCARTA_CFTR_PATHWAY	0.0669765	0.5693	320	12	1	PRKAR2B
BIOCARTA_PLCE_PATHWAY	BIOCARTA_PLCE_PATHWAY	0.0669765	0.5693	320	12	1	PRKAR2B
CELLULAR_MONOVALENT_INORGANIC_CATION_HOMEOSTASIS	CELLULAR_MONOVALENT_INORGANIC_CATION_HOMEOSTASIS	0.0615702	0.5693	320	11	1	BCL2
COFACTOR_TRANSPORT	COFACTOR_TRANSPORT	0.0615702	0.5693	320	11	1	SLC22A4
DEPHOSPHORYLATION	DEPHOSPHORYLATION	0.0572491	0.5693	320	67	2	PTPRN2	PTPRT
GLYCOPROTEIN_BIOSYNTHETIC_PROCESS	GLYCOPROTEIN_BIOSYNTHETIC_PROCESS	0.0665525	0.5693	320	73	2	LRP2	TSPAN7
INWARD_RECTIFIER_POTASSIUM_CHANNEL_ACTIVITY	INWARD_RECTIFIER_POTASSIUM_CHANNEL_ACTIVITY	0.0669765	0.5693	320	12	1	KCNJ1
KEGG_FOLATE_BIOSYNTHESIS	KEGG_FOLATE_BIOSYNTHESIS	0.0615702	0.5693	320	11	1	ALPL
KEGG_GLYCEROPHOSPHOLIPID_METABOLISM	KEGG_GLYCEROPHOSPHOLIPID_METABOLISM	0.063398	0.5693	320	71	2	LPCAT2	LPCAT3
KEGG_LONG_TERM_POTENTIATION	KEGG_LONG_TERM_POTENTIATION	0.0602963	0.5693	320	69	2	CACNA1C	RPS6KA6
LEUKOCYTE_CHEMOTAXIS	LEUKOCYTE_CHEMOTAXIS	0.0669765	0.5693	320	12	1	DOCK2
LYASE_ACTIVITY	LYASE_ACTIVITY	0.0572491	0.5693	320	67	2	ACMSD	DDC
MALE_GONAD_DEVELOPMENT	MALE_GONAD_DEVELOPMENT	0.0669765	0.5693	320	12	1	SOX15
MITOCHONDRIAL_MEMBRANE_ORGANIZATION_AND_BIOGENESIS	MITOCHONDRIAL_MEMBRANE_ORGANIZATION_AND_BIOGENESIS	0.0615702	0.5693	320	11	1	BCL2
NEGATIVE_REGULATION_OF_HYDROLASE_ACTIVITY	NEGATIVE_REGULATION_OF_HYDROLASE_ACTIVITY	0.0615702	0.5693	320	11	1	GPX1
NICOTINIC_ACETYLCHOLINE_ACTIVATED_CATION_SELECTIVE_CHANNEL_ACTIVITY	NICOTINIC_ACETYLCHOLINE_ACTIVATED_CATION_SELECTIVE_CHANNEL_ACTIVITY	0.0615702	0.5693	320	11	1	CHRNB2
NICOTINIC_ACETYLCHOLINE_GATED_RECEPTOR_CHANNEL_COMPLEX	NICOTINIC_ACETYLCHOLINE_GATED_RECEPTOR_CHANNEL_COMPLEX	0.0615702	0.5693	320	11	1	CHRNB2
OXIDOREDUCTASE_ACTIVITY_ACTING_ON_PEROXIDE_AS_ACCEPTOR	OXIDOREDUCTASE_ACTIVITY_ACTING_ON_PEROXIDE_AS_ACCEPTOR	0.0669765	0.5693	320	12	1	GPX2
POSITIVE_REGULATION_OF_NUCLEOBASENUCLEOSIDENUCLEOTIDE_AND_NUCLEIC_ACID_METABOLIC_PROCESS	POSITIVE_REGULATION_OF_NUCLEOBASENUCLEOSIDENUCLEOTIDE_AND_NUCLEIC_ACID_METABOLIC_PROCESS	0.059037	0.5693	320	153	3	ARNTL	RSF1	TFAP2B
REACTOME_ACTIVATION_OF_RAC	REACTOME_ACTIVATION_OF_RAC	0.0669765	0.5693	320	12	1	PAK6
REACTOME_CELL_JUNCTION_ORGANIZATION	REACTOME_CELL_JUNCTION_ORGANIZATION	0.0649688	0.5693	320	72	2	CDH2	LIMS3
REACTOME_DOPAMINE_NEUROTRANSMITTER_RELEASE_CYCLE	REACTOME_DOPAMINE_NEUROTRANSMITTER_RELEASE_CYCLE	0.0615702	0.5693	320	11	1	SNAP25
REACTOME_FGFR4_LIGAND_BINDING_AND_ACTIVATION	REACTOME_FGFR4_LIGAND_BINDING_AND_ACTIVATION	0.0669765	0.5693	320	12	1	FGFR4
REACTOME_GABA_A_RECEPTOR_ACTIVATION	REACTOME_GABA_A_RECEPTOR_ACTIVATION	0.0669765	0.5693	320	12	1	GABRB3
REACTOME_HIGHLY_CALCIUM_PERMEABLE_POSTSYNAPTIC_NICOTINIC_ACETYLCHOLINE_RECEPTORS	REACTOME_HIGHLY_CALCIUM_PERMEABLE_POSTSYNAPTIC_NICOTINIC_ACETYLCHOLINE_RECEPTORS	0.0669765	0.5693	320	12	1	CHRNB2
REACTOME_MTORC1_MEDIATED_SIGNALLING	REACTOME_MTORC1_MEDIATED_SIGNALLING	0.0615702	0.5693	320	11	1	EIF4EBP1
REACTOME_PRESYNAPTIC_NICOTINIC_ACETYLCHOLINE_RECEPTORS	REACTOME_PRESYNAPTIC_NICOTINIC_ACETYLCHOLINE_RECEPTORS	0.0669765	0.5693	320	12	1	CHRNB2
REACTOME_SIGNALING_BY_ACTIVATED_POINT_MUTANTS_OF_FGFR1	REACTOME_SIGNALING_BY_ACTIVATED_POINT_MUTANTS_OF_FGFR1	0.0615702	0.5693	320	11	1	FGFR1
REACTOME_TANDEM_PORE_DOMAIN_POTASSIUM_CHANNELS	REACTOME_TANDEM_PORE_DOMAIN_POTASSIUM_CHANNELS	0.0669765	0.5693	320	12	1	KCNK3
REACTOME_THE_ACTIVATION_OF_ARYLSULFATASES	REACTOME_THE_ACTIVATION_OF_ARYLSULFATASES	0.0669765	0.5693	320	12	1	ARSH
REGULATION_OF_JNK_CASCADE	REGULATION_OF_JNK_CASCADE	0.0669765	0.5693	320	12	1	AMBP
REGULATION_OF_SYNAPSE_STRUCTURE_AND_ACTIVITY	REGULATION_OF_SYNAPSE_STRUCTURE_AND_ACTIVITY	0.0615702	0.5693	320	11	1	CNTN4
REGULATION_OF_VIRAL_REPRODUCTION	REGULATION_OF_VIRAL_REPRODUCTION	0.0615702	0.5693	320	11	1	RSF1
REPRODUCTIVE_PROCESS	REPRODUCTIVE_PROCESS	0.063738	0.5693	320	158	3	RSF1	SOX15	TBX3
RHO_GUANYL_NUCLEOTIDE_EXCHANGE_FACTOR_ACTIVITY	RHO_GUANYL_NUCLEOTIDE_EXCHANGE_FACTOR_ACTIVITY	0.0669765	0.5693	320	12	1	DOCK2
SECOND_MESSENGER_MEDIATED_SIGNALING	SECOND_MESSENGER_MEDIATED_SIGNALING	0.0572044	0.5693	320	151	3	CCR2	HRH3	SSTR2
SOLUBLE_FRACTION	SOLUBLE_FRACTION	0.0627843	0.5693	320	157	3	CCR2	GCLM	PDE4B
SPERMATID_DIFFERENTIATION	SPERMATID_DIFFERENTIATION	0.0615702	0.5693	320	11	1	SPAG6
ACETYLGLUCOSAMINYLTRANSFERASE_ACTIVITY	ACETYLGLUCOSAMINYLTRANSFERASE_ACTIVITY	0.0830098	0.571443	320	15	1	GCNT2
AGING	AGING	0.0723518	0.571443	320	13	1	TBX3
AMINE_BIOSYNTHETIC_PROCESS	AMINE_BIOSYNTHETIC_PROCESS	0.0830098	0.571443	320	15	1	BBOX1
AMINO_ACID_METABOLIC_PROCESS	AMINO_ACID_METABOLIC_PROCESS	0.0746592	0.571443	320	78	2	GCLM	HGD
BIOCARTA_AGPCR_PATHWAY	BIOCARTA_AGPCR_PATHWAY	0.0723518	0.571443	320	13	1	PRKAR2B
BIOCARTA_AKAPCENTROSOME_PATHWAY	BIOCARTA_AKAPCENTROSOME_PATHWAY	0.0830098	0.571443	320	15	1	PRKAR2B
BIOCARTA_CARM1_PATHWAY	BIOCARTA_CARM1_PATHWAY	0.0723518	0.571443	320	13	1	PRKAR2B
BIOCARTA_DREAM_PATHWAY	BIOCARTA_DREAM_PATHWAY	0.0776961	0.571443	320	14	1	PRKAR2B
BIOCARTA_ERYTH_PATHWAY	BIOCARTA_ERYTH_PATHWAY	0.0830098	0.571443	320	15	1	FLT3
BIOCARTA_HSP27_PATHWAY	BIOCARTA_HSP27_PATHWAY	0.0830098	0.571443	320	15	1	BCL2
CIRCADIAN_RHYTHM	CIRCADIAN_RHYTHM	0.0776961	0.571443	320	14	1	ARNTL
DNA_DAMAGE_RESPONSESIGNAL_TRANSDUCTION_RESULTING_IN_INDUCTION_OF_APOPTOSIS	DNA_DAMAGE_RESPONSESIGNAL_TRANSDUCTION_RESULTING_IN_INDUCTION_OF_APOPTOSIS	0.0776961	0.571443	320	14	1	CIDEB
DYSTROPHIN_ASSOCIATED_GLYCOPROTEIN_COMPLEX	DYSTROPHIN_ASSOCIATED_GLYCOPROTEIN_COMPLEX	0.0776961	0.571443	320	14	1	SSPN
EXTRINSIC_TO_PLASMA_MEMBRANE	EXTRINSIC_TO_PLASMA_MEMBRANE	0.0723518	0.571443	320	13	1	TGM3
GLAND_DEVELOPMENT	GLAND_DEVELOPMENT	0.0723518	0.571443	320	13	1	TBX3
GLUTAMINE_FAMILY_AMINO_ACID_METABOLIC_PROCESS	GLUTAMINE_FAMILY_AMINO_ACID_METABOLIC_PROCESS	0.0776961	0.571443	320	14	1	GCLM
INSOLUBLE_FRACTION	INSOLUBLE_FRACTION	0.0830098	0.571443	320	15	1	PDE4B
KEGG_CARDIAC_MUSCLE_CONTRACTION	KEGG_CARDIAC_MUSCLE_CONTRACTION	0.0681491	0.571443	320	74	2	CACNA1C	CACNA2D3
KEGG_HYPERTROPHIC_CARDIOMYOPATHY_HCM	KEGG_HYPERTROPHIC_CARDIOMYOPATHY_HCM	0.0830613	0.571443	320	83	2	CACNA1C	CACNA2D3
KEGG_SULFUR_METABOLISM	KEGG_SULFUR_METABOLISM	0.0723518	0.571443	320	13	1	SULT1E1
KERATINOCYTE_DIFFERENTIATION	KERATINOCYTE_DIFFERENTIATION	0.0830098	0.571443	320	15	1	TGM3
LEUKOCYTE_MIGRATION	LEUKOCYTE_MIGRATION	0.0830098	0.571443	320	15	1	DOCK2
MONOVALENT_INORGANIC_CATION_HOMEOSTASIS	MONOVALENT_INORGANIC_CATION_HOMEOSTASIS	0.0776961	0.571443	320	14	1	BCL2
NEUROTRANSMITTER_SECRETION	NEUROTRANSMITTER_SECRETION	0.0723518	0.571443	320	13	1	HRH3
PDZ_DOMAIN_BINDING	PDZ_DOMAIN_BINDING	0.0776961	0.571443	320	14	1	SSTR2
PHOSPHATE_TRANSMEMBRANE_TRANSPORTER_ACTIVITY	PHOSPHATE_TRANSMEMBRANE_TRANSPORTER_ACTIVITY	0.0723518	0.571443	320	13	1	ANKH
PHOSPHOPROTEIN_PHOSPHATASE_ACTIVITY	PHOSPHOPROTEIN_PHOSPHATASE_ACTIVITY	0.0746592	0.571443	320	78	2	PTPRN2	PTPRT
PROTEIN_DIMERIZATION_ACTIVITY	PROTEIN_DIMERIZATION_ACTIVITY	0.0809501	0.571443	320	175	3	AMBP	BCL2	TFAP2B
PROTEIN_TETRAMERIZATION	PROTEIN_TETRAMERIZATION	0.0723518	0.571443	320	13	1	TGM3
PROTEOGLYCAN_BIOSYNTHETIC_PROCESS	PROTEOGLYCAN_BIOSYNTHETIC_PROCESS	0.0830098	0.571443	320	15	1	CHST8
REACTOME_ACETYLCHOLINE_BINDING_AND_DOWNSTREAM_EVENTS	REACTOME_ACETYLCHOLINE_BINDING_AND_DOWNSTREAM_EVENTS	0.0830098	0.571443	320	15	1	CHRNB2
REACTOME_ACYL_CHAIN_REMODELLING_OF_PS	REACTOME_ACYL_CHAIN_REMODELLING_OF_PS	0.0830098	0.571443	320	15	1	LPCAT3
REACTOME_AMINE_DERIVED_HORMONES	REACTOME_AMINE_DERIVED_HORMONES	0.0830098	0.571443	320	15	1	DDC
REACTOME_CELL_EXTRACELLULAR_MATRIX_INTERACTIONS	REACTOME_CELL_EXTRACELLULAR_MATRIX_INTERACTIONS	0.0776961	0.571443	320	14	1	LIMS3
REACTOME_CRMPS_IN_SEMA3A_SIGNALING	REACTOME_CRMPS_IN_SEMA3A_SIGNALING	0.0776961	0.571443	320	14	1	CRMP1
REACTOME_CYTOSOLIC_SULFONATION_OF_SMALL_MOLECULES	REACTOME_CYTOSOLIC_SULFONATION_OF_SMALL_MOLECULES	0.0776961	0.571443	320	14	1	SULT1E1
REACTOME_DCC_MEDIATED_ATTRACTIVE_SIGNALING	REACTOME_DCC_MEDIATED_ATTRACTIVE_SIGNALING	0.0723518	0.571443	320	13	1	ABLIM3
REACTOME_FGFR1_LIGAND_BINDING_AND_ACTIVATION	REACTOME_FGFR1_LIGAND_BINDING_AND_ACTIVATION	0.0776961	0.571443	320	14	1	FGFR1
REACTOME_GLUTAMATE_NEUROTRANSMITTER_RELEASE_CYCLE	REACTOME_GLUTAMATE_NEUROTRANSMITTER_RELEASE_CYCLE	0.0830098	0.571443	320	15	1	SNAP25
REACTOME_METABOLISM_OF_PORPHYRINS	REACTOME_METABOLISM_OF_PORPHYRINS	0.0776961	0.571443	320	14	1	HMOX1
REACTOME_MRNA_DECAY_BY_5_TO_3_EXORIBONUCLEASE	REACTOME_MRNA_DECAY_BY_5_TO_3_EXORIBONUCLEASE	0.0776961	0.571443	320	14	1	LSM1
REACTOME_OPIOID_SIGNALLING	REACTOME_OPIOID_SIGNALLING	0.0713797	0.571443	320	76	2	PDE4B	PRKAR2B
REACTOME_ORGANIC_CATION_ANION_ZWITTERION_TRANSPORT	REACTOME_ORGANIC_CATION_ANION_ZWITTERION_TRANSPORT	0.0723518	0.571443	320	13	1	SLC22A4
REACTOME_PHOSPHORYLATION_OF_CD3_AND_TCR_ZETA_CHAINS	REACTOME_PHOSPHORYLATION_OF_CD3_AND_TCR_ZETA_CHAINS	0.0830098	0.571443	320	15	1	HLA-DQA2
REACTOME_PLATELET_HOMEOSTASIS	REACTOME_PLATELET_HOMEOSTASIS	0.0681491	0.571443	320	74	2	ATP2B2	PDE10A
REACTOME_SHC_MEDIATED_SIGNALLING	REACTOME_SHC_MEDIATED_SIGNALLING	0.0830098	0.571443	320	15	1	SHC3
REACTOME_SIGNAL_ATTENUATION	REACTOME_SIGNAL_ATTENUATION	0.0723518	0.571443	320	13	1	SHC3
REACTOME_TRAFFICKING_OF_GLUR2_CONTAINING_AMPA_RECEPTORS	REACTOME_TRAFFICKING_OF_GLUR2_CONTAINING_AMPA_RECEPTORS	0.0830098	0.571443	320	15	1	GRIA3
REACTOME_TRANSLOCATION_OF_ZAP_70_TO_IMMUNOLOGICAL_SYNAPSE	REACTOME_TRANSLOCATION_OF_ZAP_70_TO_IMMUNOLOGICAL_SYNAPSE	0.0723518	0.571443	320	13	1	HLA-DQA2
REACTOME_UNBLOCKING_OF_NMDA_RECEPTOR_GLUTAMATE_BINDING_AND_ACTIVATION	REACTOME_UNBLOCKING_OF_NMDA_RECEPTOR_GLUTAMATE_BINDING_AND_ACTIVATION	0.0830098	0.571443	320	15	1	GRIA3
REACTOME_ZINC_TRANSPORTERS	REACTOME_ZINC_TRANSPORTERS	0.0830098	0.571443	320	15	1	SLC30A8
RECEPTOR_SIGNALING_PROTEIN_ACTIVITY	RECEPTOR_SIGNALING_PROTEIN_ACTIVITY	0.0796665	0.571443	320	81	2	BAG4	IL1RN
REGIONALIZATION	REGIONALIZATION	0.0776961	0.571443	320	14	1	TBX3
REGULATED_SECRETORY_PATHWAY	REGULATED_SECRETORY_PATHWAY	0.0830098	0.571443	320	15	1	HRH3
REGULATION_OF_HORMONE_SECRETION	REGULATION_OF_HORMONE_SECRETION	0.0776961	0.571443	320	14	1	SNAP25
REGULATION_OF_MEMBRANE_POTENTIAL	REGULATION_OF_MEMBRANE_POTENTIAL	0.0830098	0.571443	320	15	1	BCL2
REGULATION_OF_PH	REGULATION_OF_PH	0.0723518	0.571443	320	13	1	BCL2
RESPONSE_TO_OTHER_ORGANISM	RESPONSE_TO_OTHER_ORGANISM	0.0763167	0.571443	320	79	2	BCL2	CAMP
SH3_DOMAIN_BINDING	SH3_DOMAIN_BINDING	0.0830098	0.571443	320	15	1	GPX1
STEROID_HORMONE_RECEPTOR_ACTIVITY	STEROID_HORMONE_RECEPTOR_ACTIVITY	0.0723518	0.571443	320	13	1	NR3C2
SYNAPSE_PART	SYNAPSE_PART	0.0723518	0.571443	320	13	1	CACNA1C
SYNAPTIC_VESICLE	SYNAPTIC_VESICLE	0.0830098	0.571443	320	15	1	SVOP
TUBE_MORPHOGENESIS	TUBE_MORPHOGENESIS	0.0830098	0.571443	320	15	1	GCLM
VITAMIN_TRANSPORT	VITAMIN_TRANSPORT	0.0723518	0.571443	320	13	1	SLC22A4
VOLTAGE_GATED_CALCIUM_CHANNEL_COMPLEX	VOLTAGE_GATED_CALCIUM_CHANNEL_COMPLEX	0.0830098	0.571443	320	15	1	CACNA1C
ACETYLCHOLINE_BINDING	ACETYLCHOLINE_BINDING	0.0935458	0.574498	320	17	1	CHRNB2
ALCOHOL_METABOLIC_PROCESS	ALCOHOL_METABOLIC_PROCESS	0.0899802	0.574498	320	87	2	ALDH3B2	NPC1L1
ANTIOXIDANT_ACTIVITY	ANTIOXIDANT_ACTIVITY	0.0935458	0.574498	320	17	1	GPX2
BIOCARTA_CK1_PATHWAY	BIOCARTA_CK1_PATHWAY	0.0935458	0.574498	320	17	1	PRKAR2B
BIOCARTA_GATA3_PATHWAY	BIOCARTA_GATA3_PATHWAY	0.0882929	0.574498	320	16	1	PRKAR2B
BIOCARTA_IL10_PATHWAY	BIOCARTA_IL10_PATHWAY	0.0935458	0.574498	320	17	1	HMOX1
BIOCARTA_IL7_PATHWAY	BIOCARTA_IL7_PATHWAY	0.0935458	0.574498	320	17	1	BCL2
BIOCARTA_P53_PATHWAY	BIOCARTA_P53_PATHWAY	0.0882929	0.574498	320	16	1	BCL2
BIOCARTA_SHH_PATHWAY	BIOCARTA_SHH_PATHWAY	0.0882929	0.574498	320	16	1	PRKAR2B
BIOGENIC_AMINE_METABOLIC_PROCESS	BIOGENIC_AMINE_METABOLIC_PROCESS	0.0935458	0.574498	320	17	1	BBOX1
CHROMATIN_ASSEMBLY	CHROMATIN_ASSEMBLY	0.0882929	0.574498	320	16	1	RSF1
CHROMATIN_REMODELING_COMPLEX	CHROMATIN_REMODELING_COMPLEX	0.0935458	0.574498	320	17	1	RSF1
EARLY_ENDOSOME	EARLY_ENDOSOME	0.0935458	0.574498	320	17	1	DNER
EMBRYONIC_MORPHOGENESIS	EMBRYONIC_MORPHOGENESIS	0.0935458	0.574498	320	17	1	TBX3
GLUTAMATE_SIGNALING_PATHWAY	GLUTAMATE_SIGNALING_PATHWAY	0.0935458	0.574498	320	17	1	GRIA3
GLYCOPROTEIN_METABOLIC_PROCESS	GLYCOPROTEIN_METABOLIC_PROCESS	0.0935013	0.574498	320	89	2	LRP2	TSPAN7
ICOSANOID_METABOLIC_PROCESS	ICOSANOID_METABOLIC_PROCESS	0.0935458	0.574498	320	17	1	CYP4F3
KEGG_HEMATOPOIETIC_CELL_LINEAGE	KEGG_HEMATOPOIETIC_CELL_LINEAGE	0.0864997	0.574498	320	85	2	FLT3	IL1R1
KEGG_PROSTATE_CANCER	KEGG_PROSTATE_CANCER	0.0935013	0.574498	320	89	2	BCL2	FGFR1
MITOCHONDRIAL_ENVELOPE	MITOCHONDRIAL_ENVELOPE	0.0864997	0.574498	320	85	2	BCL2	MAOB
MONOCARBOXYLIC_ACID_METABOLIC_PROCESS	MONOCARBOXYLIC_ACID_METABOLIC_PROCESS	0.0899802	0.574498	320	87	2	BBOX1	CYP4F3
MYOBLAST_DIFFERENTIATION	MYOBLAST_DIFFERENTIATION	0.0935458	0.574498	320	17	1	TBX3
NEGATIVE_REGULATION_OF_DNA_BINDING	NEGATIVE_REGULATION_OF_DNA_BINDING	0.0935458	0.574498	320	17	1	RSF1
NEGATIVE_REGULATION_OF_TRANSCRIPTION	NEGATIVE_REGULATION_OF_TRANSCRIPTION	0.0919136	0.574498	320	185	3	RSF1	TBX3	ZNF177
OXIDOREDUCTASE_ACTIVITY_ACTING_ON_THE_ALDEHYDE_OR_OXO_GROUP_OF_DONORSNAD_OR_NADP_AS_ACCEPTOR	OXIDOREDUCTASE_ACTIVITY_ACTING_ON_THE_ALDEHYDE_OR_OXO_GROUP_OF_DONORSNAD_OR_NADP_AS_ACCEPTOR	0.0882929	0.574498	320	16	1	ALDH3B2
POSITIVE_REGULATION_OF_CELL_CYCLE	POSITIVE_REGULATION_OF_CELL_CYCLE	0.0882929	0.574498	320	16	1	TBX3
POSITIVE_REGULATION_OF_I_KAPPAB_KINASE_NF_KAPPAB_CASCADE	POSITIVE_REGULATION_OF_I_KAPPAB_KINASE_NF_KAPPAB_CASCADE	0.0899802	0.574498	320	87	2	ECM1	HMOX1
REACTOME_ACTIVATION_OF_BH3_ONLY_PROTEINS	REACTOME_ACTIVATION_OF_BH3_ONLY_PROTEINS	0.0882929	0.574498	320	16	1	BCL2
REACTOME_GABA_SYNTHESIS_RELEASE_REUPTAKE_AND_DEGRADATION	REACTOME_GABA_SYNTHESIS_RELEASE_REUPTAKE_AND_DEGRADATION	0.0935458	0.574498	320	17	1	SNAP25
REACTOME_PD1_SIGNALING	REACTOME_PD1_SIGNALING	0.0935458	0.574498	320	17	1	HLA-DQA2
REACTOME_PKA_MEDIATED_PHOSPHORYLATION_OF_CREB	REACTOME_PKA_MEDIATED_PHOSPHORYLATION_OF_CREB	0.0935458	0.574498	320	17	1	PRKAR2B
REACTOME_PLATELET_CALCIUM_HOMEOSTASIS	REACTOME_PLATELET_CALCIUM_HOMEOSTASIS	0.0882929	0.574498	320	16	1	ATP2B2
REACTOME_POST_TRANSLATIONAL_PROTEIN_MODIFICATION	REACTOME_POST_TRANSLATIONAL_PROTEIN_MODIFICATION	0.0841763	0.574498	320	178	3	ARSH	GALNT13	MUCL1
REACTOME_PROTEOLYTIC_CLEAVAGE_OF_SNARE_COMPLEX_PROTEINS	REACTOME_PROTEOLYTIC_CLEAVAGE_OF_SNARE_COMPLEX_PROTEINS	0.0882929	0.574498	320	16	1	SNAP25
REACTOME_SHC_RELATED_EVENTS	REACTOME_SHC_RELATED_EVENTS	0.0935458	0.574498	320	17	1	SHC3
REACTOME_SYNTHESIS_OF_PIPS_AT_THE_GOLGI_MEMBRANE	REACTOME_SYNTHESIS_OF_PIPS_AT_THE_GOLGI_MEMBRANE	0.0935458	0.574498	320	17	1	PIK3C2G
RESPONSE_TO_ABIOTIC_STIMULUS	RESPONSE_TO_ABIOTIC_STIMULUS	0.0847752	0.574498	320	84	2	GPX1	XRRA1
RESPONSE_TO_NUTRIENT	RESPONSE_TO_NUTRIENT	0.0935458	0.574498	320	17	1	SSTR2
SECRETORY_PATHWAY	SECRETORY_PATHWAY	0.0847752	0.574498	320	84	2	CPLX2	HRH3
SULFURIC_ESTER_HYDROLASE_ACTIVITY	SULFURIC_ESTER_HYDROLASE_ACTIVITY	0.0882929	0.574498	320	16	1	ARSH
VITAMIN_METABOLIC_PROCESS	VITAMIN_METABOLIC_PROCESS	0.0935458	0.574498	320	17	1	BBOX1
KEGG_DILATED_CARDIOMYOPATHY	KEGG_DILATED_CARDIOMYOPATHY	0.0952768	0.583601	320	90	2	CACNA1C	CACNA2D3
BIOCARTA_TEL_PATHWAY	BIOCARTA_TEL_PATHWAY	0.0987684	0.589595	320	18	1	BCL2
MITOCHONDRIAL_OUTER_MEMBRANE	MITOCHONDRIAL_OUTER_MEMBRANE	0.0987684	0.589595	320	18	1	BCL2
NEGATIVE_REGULATION_OF_BINDING	NEGATIVE_REGULATION_OF_BINDING	0.0987684	0.589595	320	18	1	RSF1
REACTOME_BOTULINUM_NEUROTOXICITY	REACTOME_BOTULINUM_NEUROTOXICITY	0.0987684	0.589595	320	18	1	SNAP25
REACTOME_GLUCURONIDATION	REACTOME_GLUCURONIDATION	0.0987684	0.589595	320	18	1	UGT1A4
REACTOME_SYNTHESIS_OF_PC	REACTOME_SYNTHESIS_OF_PC	0.0987684	0.589595	320	18	1	SLC44A4
RNA_SPLICING	RNA_SPLICING	0.0970618	0.589595	320	91	2	LSM1	NOVA1
SULFUR_COMPOUND_BIOSYNTHETIC_PROCESS	SULFUR_COMPOUND_BIOSYNTHETIC_PROCESS	0.0987684	0.589595	320	18	1	GCLM
TUBE_DEVELOPMENT	TUBE_DEVELOPMENT	0.0987684	0.589595	320	18	1	GCLM
VOLTAGE_GATED_CALCIUM_CHANNEL_ACTIVITY	VOLTAGE_GATED_CALCIUM_CHANNEL_ACTIVITY	0.0987684	0.589595	320	18	1	CACNA1C
KEGG_FC_GAMMA_R_MEDIATED_PHAGOCYTOSIS	KEGG_FC_GAMMA_R_MEDIATED_PHAGOCYTOSIS	0.10066	0.597845	320	93	2	DOCK2	MARCKS
REGULATION_OF_I_KAPPAB_KINASE_NF_KAPPAB_CASCADE	REGULATION_OF_I_KAPPAB_KINASE_NF_KAPPAB_CASCADE	0.10066	0.597845	320	93	2	ECM1	HMOX1
BIOCARTA_CALCINEURIN_PATHWAY	BIOCARTA_CALCINEURIN_PATHWAY	0.103961	0.602204	320	19	1	MARCKS
BIOCARTA_STATHMIN_PATHWAY	BIOCARTA_STATHMIN_PATHWAY	0.103961	0.602204	320	19	1	PRKAR2B
CELL_RECOGNITION	CELL_RECOGNITION	0.103961	0.602204	320	19	1	CNTN4
CHLORIDE_CHANNEL_ACTIVITY	CHLORIDE_CHANNEL_ACTIVITY	0.103961	0.602204	320	19	1	CLCA2
INORGANIC_ANION_TRANSMEMBRANE_TRANSPORTER_ACTIVITY	INORGANIC_ANION_TRANSMEMBRANE_TRANSPORTER_ACTIVITY	0.103961	0.602204	320	19	1	ANKH
INTRAMOLECULAR_OXIDOREDUCTASE_ACTIVITY	INTRAMOLECULAR_OXIDOREDUCTASE_ACTIVITY	0.103961	0.602204	320	19	1	PTGIS
RAS_GUANYL_NUCLEOTIDE_EXCHANGE_FACTOR_ACTIVITY	RAS_GUANYL_NUCLEOTIDE_EXCHANGE_FACTOR_ACTIVITY	0.103961	0.602204	320	19	1	DOCK2
REACTOME_CGMP_EFFECTS	REACTOME_CGMP_EFFECTS	0.103961	0.602204	320	19	1	PDE10A
REACTOME_INSULIN_SYNTHESIS_AND_PROCESSING	REACTOME_INSULIN_SYNTHESIS_AND_PROCESSING	0.103961	0.602204	320	19	1	SNAP25
RNA_SPLICING_FACTOR_ACTIVITYTRANSESTERIFICATION_MECHANISM	RNA_SPLICING_FACTOR_ACTIVITYTRANSESTERIFICATION_MECHANISM	0.103961	0.602204	320	19	1	LSM1
LIPID_BIOSYNTHETIC_PROCESS	LIPID_BIOSYNTHETIC_PROCESS	0.104295	0.602652	320	95	2	AGPS	NPC1L1
KEGG_FOCAL_ADHESION	KEGG_FOCAL_ADHESION	0.105829	0.610009	320	197	3	BCL2	PAK6	SHC3
PROTEINACEOUS_EXTRACELLULAR_MATRIX	PROTEINACEOUS_EXTRACELLULAR_MATRIX	0.106126	0.610225	320	96	2	ECM1	SSPN
ANION_CHANNEL_ACTIVITY	ANION_CHANNEL_ACTIVITY	0.109124	0.618368	320	20	1	CLCA2
BIOCARTA_IGF1MTOR_PATHWAY	BIOCARTA_IGF1MTOR_PATHWAY	0.109124	0.618368	320	20	1	EIF4EBP1
CYTOSOL	CYTOSOL	0.108224	0.618368	320	199	3	AKR7A3	CIDEB	LCP1
INTERLEUKIN_RECEPTOR_ACTIVITY	INTERLEUKIN_RECEPTOR_ACTIVITY	0.109124	0.618368	320	20	1	IL1R1
PROTEOGLYCAN_METABOLIC_PROCESS	PROTEOGLYCAN_METABOLIC_PROCESS	0.109124	0.618368	320	20	1	CHST8
REGULATION_OF_MAPKKK_CASCADE	REGULATION_OF_MAPKKK_CASCADE	0.109124	0.618368	320	20	1	AMBP
EXTRACELLULAR_MATRIX	EXTRACELLULAR_MATRIX	0.109814	0.620778	320	98	2	ECM1	SSPN
BASAL_LAMINA	BASAL_LAMINA	0.114257	0.626278	320	21	1	SSPN
BIOCARTA_MITOCHONDRIA_PATHWAY	BIOCARTA_MITOCHONDRIA_PATHWAY	0.114257	0.626278	320	21	1	BCL2
COFACTOR_BIOSYNTHETIC_PROCESS	COFACTOR_BIOSYNTHETIC_PROCESS	0.114257	0.626278	320	21	1	GCLM
EPIDERMAL_GROWTH_FACTOR_RECEPTOR_SIGNALING_PATHWAY	EPIDERMAL_GROWTH_FACTOR_RECEPTOR_SIGNALING_PATHWAY	0.114257	0.626278	320	21	1	SHC3
EXCITATORY_EXTRACELLULAR_LIGAND_GATED_ION_CHANNEL_ACTIVITY	EXCITATORY_EXTRACELLULAR_LIGAND_GATED_ION_CHANNEL_ACTIVITY	0.114257	0.626278	320	21	1	CHRNB2
MESODERM_DEVELOPMENT	MESODERM_DEVELOPMENT	0.114257	0.626278	320	21	1	TBX3
MITOCHONDRIAL_TRANSPORT	MITOCHONDRIAL_TRANSPORT	0.114257	0.626278	320	21	1	BCL2
REACTOME_ACYL_CHAIN_REMODELLING_OF_PE	REACTOME_ACYL_CHAIN_REMODELLING_OF_PE	0.114257	0.626278	320	21	1	LPCAT3
REACTOME_INTERACTION_BETWEEN_L1_AND_ANKYRINS	REACTOME_INTERACTION_BETWEEN_L1_AND_ANKYRINS	0.114257	0.626278	320	21	1	KCNQ3
REACTOME_LIGAND_GATED_ION_CHANNEL_TRANSPORT	REACTOME_LIGAND_GATED_ION_CHANNEL_TRANSPORT	0.114257	0.626278	320	21	1	GABRB3
REACTOME_PEROXISOMAL_LIPID_METABOLISM	REACTOME_PEROXISOMAL_LIPID_METABOLISM	0.114257	0.626278	320	21	1	AGPS
REACTOME_TERMINATION_OF_O_GLYCAN_BIOSYNTHESIS	REACTOME_TERMINATION_OF_O_GLYCAN_BIOSYNTHESIS	0.114257	0.626278	320	21	1	MUCL1
RESPONSE_TO_DRUG	RESPONSE_TO_DRUG	0.114257	0.626278	320	21	1	GCLM
MAPKKK_CASCADE_GO_0000165	MAPKKK_CASCADE_GO_0000165	0.115407	0.631107	320	101	2	AMBP	FGFR1
BIOCARTA_CERAMIDE_PATHWAY	BIOCARTA_CERAMIDE_PATHWAY	0.119361	0.637859	320	22	1	BCL2
BIOCARTA_CHEMICAL_PATHWAY	BIOCARTA_CHEMICAL_PATHWAY	0.119361	0.637859	320	22	1	BCL2
BIOCARTA_CSK_PATHWAY	BIOCARTA_CSK_PATHWAY	0.119361	0.637859	320	22	1	PRKAR2B
BIOCARTA_NOS1_PATHWAY	BIOCARTA_NOS1_PATHWAY	0.119361	0.637859	320	22	1	PRKAR2B
CYTOKINE_AND_CHEMOKINE_MEDIATED_SIGNALING_PATHWAY	CYTOKINE_AND_CHEMOKINE_MEDIATED_SIGNALING_PATHWAY	0.119361	0.637859	320	22	1	CCR2
EXTRACELLULAR_LIGAND_GATED_ION_CHANNEL_ACTIVITY	EXTRACELLULAR_LIGAND_GATED_ION_CHANNEL_ACTIVITY	0.119361	0.637859	320	22	1	CHRNB2
MUSCLE_CELL_DIFFERENTIATION	MUSCLE_CELL_DIFFERENTIATION	0.119361	0.637859	320	22	1	TBX3
NEUROPEPTIDE_RECEPTOR_ACTIVITY	NEUROPEPTIDE_RECEPTOR_ACTIVITY	0.119361	0.637859	320	22	1	SSTR2
OXIDOREDUCTASE_ACTIVITY_ACTING_ON_THE_ALDEHYDE_OR_OXO_GROUP_OF_DONORS	OXIDOREDUCTASE_ACTIVITY_ACTING_ON_THE_ALDEHYDE_OR_OXO_GROUP_OF_DONORS	0.119361	0.637859	320	22	1	ALDH3B2
REACTOME_PPARA_ACTIVATES_GENE_EXPRESSION	REACTOME_PPARA_ACTIVATES_GENE_EXPRESSION	0.119176	0.637859	320	103	2	ARNTL	RORA
AMINE_BINDING	AMINE_BINDING	0.124435	0.644425	320	23	1	CHRNB2
AMINO_ACID_DERIVATIVE_METABOLIC_PROCESS	AMINO_ACID_DERIVATIVE_METABOLIC_PROCESS	0.124435	0.644425	320	23	1	BBOX1
BIOCARTA_CCR3_PATHWAY	BIOCARTA_CCR3_PATHWAY	0.124435	0.644425	320	23	1	PIK3C2G
BIOCARTA_IGF1R_PATHWAY	BIOCARTA_IGF1R_PATHWAY	0.124435	0.644425	320	23	1	PRKAR2B
BIOCARTA_MTOR_PATHWAY	BIOCARTA_MTOR_PATHWAY	0.124435	0.644425	320	23	1	EIF4EBP1
BIOCARTA_NFKB_PATHWAY	BIOCARTA_NFKB_PATHWAY	0.124435	0.644425	320	23	1	IL1R1
INDUCTION_OF_APOPTOSIS_BY_INTRACELLULAR_SIGNALS	INDUCTION_OF_APOPTOSIS_BY_INTRACELLULAR_SIGNALS	0.124435	0.644425	320	23	1	CIDEB
INTEGRAL_TO_ENDOPLASMIC_RETICULUM_MEMBRANE	INTEGRAL_TO_ENDOPLASMIC_RETICULUM_MEMBRANE	0.124435	0.644425	320	23	1	RTN1
INTRINSIC_TO_ENDOPLASMIC_RETICULUM_MEMBRANE	INTRINSIC_TO_ENDOPLASMIC_RETICULUM_MEMBRANE	0.124435	0.644425	320	23	1	RTN1
NEUROPEPTIDE_BINDING	NEUROPEPTIDE_BINDING	0.124435	0.644425	320	23	1	SSTR2
REACTOME_ADHERENS_JUNCTIONS_INTERACTIONS	REACTOME_ADHERENS_JUNCTIONS_INTERACTIONS	0.124435	0.644425	320	23	1	CDH2
REACTOME_NITRIC_OXIDE_STIMULATES_GUANYLATE_CYCLASE	REACTOME_NITRIC_OXIDE_STIMULATES_GUANYLATE_CYCLASE	0.124435	0.644425	320	23	1	PDE10A
REACTOME_SULFUR_AMINO_ACID_METABOLISM	REACTOME_SULFUR_AMINO_ACID_METABOLISM	0.124435	0.644425	320	23	1	GCLM
STEROID_BIOSYNTHETIC_PROCESS	STEROID_BIOSYNTHETIC_PROCESS	0.124435	0.644425	320	23	1	NPC1L1
REACTOME_SIGNALING_BY_ILS	REACTOME_SIGNALING_BY_ILS	0.124885	0.645331	320	106	2	IL1R1	IL1RN
PHOSPHORIC_MONOESTER_HYDROLASE_ACTIVITY	PHOSPHORIC_MONOESTER_HYDROLASE_ACTIVITY	0.126803	0.6538	320	107	2	PTPRN2	PTPRT
BIOCARTA_CXCR4_PATHWAY	BIOCARTA_CXCR4_PATHWAY	0.12948	0.660349	320	24	1	PIK3C2G
BIOCARTA_EIF4_PATHWAY	BIOCARTA_EIF4_PATHWAY	0.12948	0.660349	320	24	1	EIF4EBP1
KEGG_DORSO_VENTRAL_AXIS_FORMATION	KEGG_DORSO_VENTRAL_AXIS_FORMATION	0.12948	0.660349	320	24	1	CPEB1
ORGANELLE_OUTER_MEMBRANE	ORGANELLE_OUTER_MEMBRANE	0.12948	0.660349	320	24	1	BCL2
REGULATION_OF_NEUROTRANSMITTER_LEVELS	REGULATION_OF_NEUROTRANSMITTER_LEVELS	0.12948	0.660349	320	24	1	HRH3
GAMETE_GENERATION	GAMETE_GENERATION	0.130659	0.664914	320	109	2	MOV10L1	SPAG6
ACTIN_FILAMENT_BINDING	ACTIN_FILAMENT_BINDING	0.134496	0.665672	320	25	1	MARCKS
AMINO_ACID_CATABOLIC_PROCESS	AMINO_ACID_CATABOLIC_PROCESS	0.134496	0.665672	320	25	1	HGD
BIOCARTA_MCALPAIN_PATHWAY	BIOCARTA_MCALPAIN_PATHWAY	0.134496	0.665672	320	25	1	PRKAR2B
CHROMATIN_REMODELING	CHROMATIN_REMODELING	0.134496	0.665672	320	25	1	RSF1
DEFENSE_RESPONSE_TO_BACTERIUM	DEFENSE_RESPONSE_TO_BACTERIUM	0.134496	0.665672	320	25	1	CAMP
EXOCYTOSIS	EXOCYTOSIS	0.134496	0.665672	320	25	1	CPLX2
EXTRINSIC_TO_MEMBRANE	EXTRINSIC_TO_MEMBRANE	0.134496	0.665672	320	25	1	TGM3
INTERLEUKIN_BINDING	INTERLEUKIN_BINDING	0.134496	0.665672	320	25	1	IL1R1
KEGG_ASCORBATE_AND_ALDARATE_METABOLISM	KEGG_ASCORBATE_AND_ALDARATE_METABOLISM	0.134496	0.665672	320	25	1	UGT1A4
KEGG_GLYCOSPHINGOLIPID_BIOSYNTHESIS_LACTO_AND_NEOLACTO_SERIES	KEGG_GLYCOSPHINGOLIPID_BIOSYNTHESIS_LACTO_AND_NEOLACTO_SERIES	0.134496	0.665672	320	25	1	GCNT2
NITROGEN_COMPOUND_BIOSYNTHETIC_PROCESS	NITROGEN_COMPOUND_BIOSYNTHETIC_PROCESS	0.134496	0.665672	320	25	1	BBOX1
REACTOME_GENERATION_OF_SECOND_MESSENGER_MOLECULES	REACTOME_GENERATION_OF_SECOND_MESSENGER_MOLECULES	0.134496	0.665672	320	25	1	HLA-DQA2
SERINE_TYPE_ENDOPEPTIDASE_INHIBITOR_ACTIVITY	SERINE_TYPE_ENDOPEPTIDASE_INHIBITOR_ACTIVITY	0.134496	0.665672	320	25	1	AMBP
REACTOME_CELL_CELL_COMMUNICATION	REACTOME_CELL_CELL_COMMUNICATION	0.136493	0.67413	320	112	2	CDH2	LIMS3
CHROMATIN_ASSEMBLY_OR_DISASSEMBLY	CHROMATIN_ASSEMBLY_OR_DISASSEMBLY	0.139484	0.677493	320	26	1	RSF1
I_KAPPAB_KINASE_NF_KAPPAB_CASCADE	I_KAPPAB_KINASE_NF_KAPPAB_CASCADE	0.13845	0.677493	320	113	2	ECM1	HMOX1
KEGG_O_GLYCAN_BIOSYNTHESIS	KEGG_O_GLYCAN_BIOSYNTHESIS	0.139484	0.677493	320	26	1	GALNT13
REACTOME_ACTIVATED_NOTCH1_TRANSMITS_SIGNAL_TO_THE_NUCLEUS	REACTOME_ACTIVATED_NOTCH1_TRANSMITS_SIGNAL_TO_THE_NUCLEUS	0.139484	0.677493	320	26	1	DNER
REACTOME_MYOGENESIS	REACTOME_MYOGENESIS	0.139484	0.677493	320	26	1	CDH2
REACTOME_PTM_GAMMA_CARBOXYLATION_HYPUSINE_FORMATION_AND_ARYLSULFATASE_ACTIVATION	REACTOME_PTM_GAMMA_CARBOXYLATION_HYPUSINE_FORMATION_AND_ARYLSULFATASE_ACTIVATION	0.139484	0.677493	320	26	1	ARSH
REACTOME_RECYCLING_PATHWAY_OF_L1	REACTOME_RECYCLING_PATHWAY_OF_L1	0.139484	0.677493	320	26	1	RPS6KA6
RESPONSE_TO_UV	RESPONSE_TO_UV	0.139484	0.677493	320	26	1	GPX1
PROTEIN_HOMODIMERIZATION_ACTIVITY	PROTEIN_HOMODIMERIZATION_ACTIVITY	0.140414	0.6806	320	114	2	AMBP	BCL2
AMINE_CATABOLIC_PROCESS	AMINE_CATABOLIC_PROCESS	0.144443	0.683191	320	27	1	HGD
AROMATIC_COMPOUND_METABOLIC_PROCESS	AROMATIC_COMPOUND_METABOLIC_PROCESS	0.144443	0.683191	320	27	1	HGD
BIOCARTA_CREB_PATHWAY	BIOCARTA_CREB_PATHWAY	0.144443	0.683191	320	27	1	PRKAR2B
BIOCARTA_VIP_PATHWAY	BIOCARTA_VIP_PATHWAY	0.144443	0.683191	320	27	1	PRKAR2B
KEGG_PENTOSE_AND_GLUCURONATE_INTERCONVERSIONS	KEGG_PENTOSE_AND_GLUCURONATE_INTERCONVERSIONS	0.144443	0.683191	320	27	1	UGT1A4
REACTOME_AMINE_COMPOUND_SLC_TRANSPORTERS	REACTOME_AMINE_COMPOUND_SLC_TRANSPORTERS	0.144443	0.683191	320	27	1	SLC44A4
REACTOME_CREB_PHOSPHORYLATION_THROUGH_THE_ACTIVATION_OF_RAS	REACTOME_CREB_PHOSPHORYLATION_THROUGH_THE_ACTIVATION_OF_RAS	0.144443	0.683191	320	27	1	RPS6KA6
REACTOME_SIGNALLING_TO_RAS	REACTOME_SIGNALLING_TO_RAS	0.144443	0.683191	320	27	1	SHC3
REACTOME_TRAFFICKING_OF_AMPA_RECEPTORS	REACTOME_TRAFFICKING_OF_AMPA_RECEPTORS	0.144443	0.683191	320	27	1	GRIA3
RESPONSE_TO_BIOTIC_STIMULUS	RESPONSE_TO_BIOTIC_STIMULUS	0.142383	0.683191	320	115	2	BCL2	CAMP
SECRETION_BY_CELL	SECRETION_BY_CELL	0.144359	0.683191	320	116	2	CPLX2	HRH3
SYNAPSE	SYNAPSE	0.144443	0.683191	320	27	1	CACNA1C
KEGG_ASTHMA	KEGG_ASTHMA	0.149373	0.696678	320	28	1	HLA-DQA2
LIPID_TRANSPORT	LIPID_TRANSPORT	0.149373	0.696678	320	28	1	NPC1L1
REACTOME_CA_DEPENDENT_EVENTS	REACTOME_CA_DEPENDENT_EVENTS	0.149373	0.696678	320	28	1	PRKAR2B
REACTOME_PKB_MEDIATED_EVENTS	REACTOME_PKB_MEDIATED_EVENTS	0.149373	0.696678	320	28	1	EIF4EBP1
REACTOME_SIGNALING_BY_ROBO_RECEPTOR	REACTOME_SIGNALING_BY_ROBO_RECEPTOR	0.149373	0.696678	320	28	1	PAK6
REACTOME_THE_ROLE_OF_NEF_IN_HIV1_REPLICATION_AND_DISEASE_PATHOGENESIS	REACTOME_THE_ROLE_OF_NEF_IN_HIV1_REPLICATION_AND_DISEASE_PATHOGENESIS	0.149373	0.696678	320	28	1	DOCK2
RESPONSE_TO_HYPOXIA	RESPONSE_TO_HYPOXIA	0.149373	0.696678	320	28	1	CHRNB2
BIOCARTA_NKT_PATHWAY	BIOCARTA_NKT_PATHWAY	0.154275	0.706892	320	29	1	CCR2
BIOCARTA_TNFR1_PATHWAY	BIOCARTA_TNFR1_PATHWAY	0.154275	0.706892	320	29	1	BAG4
BONE_REMODELING	BONE_REMODELING	0.154275	0.706892	320	29	1	ANKH
NITROGEN_COMPOUND_CATABOLIC_PROCESS	NITROGEN_COMPOUND_CATABOLIC_PROCESS	0.154275	0.706892	320	29	1	HGD
REACTOME_INTRINSIC_PATHWAY_FOR_APOPTOSIS	REACTOME_INTRINSIC_PATHWAY_FOR_APOPTOSIS	0.154275	0.706892	320	29	1	BCL2
REACTOME_SIGNALING_BY_FGFR1_MUTANTS	REACTOME_SIGNALING_BY_FGFR1_MUTANTS	0.154275	0.706892	320	29	1	FGFR1
REACTOME_STEROID_HORMONES	REACTOME_STEROID_HORMONES	0.154275	0.706892	320	29	1	LRP2
RESPONSE_TO_NUTRIENT_LEVELS	RESPONSE_TO_NUTRIENT_LEVELS	0.154275	0.706892	320	29	1	SSTR2
RHYTHMIC_PROCESS	RHYTHMIC_PROCESS	0.154275	0.706892	320	29	1	ARNTL
ACTIVE_TRANSMEMBRANE_TRANSPORTER_ACTIVITY	ACTIVE_TRANSMEMBRANE_TRANSPORTER_ACTIVITY	0.156328	0.711167	320	122	2	ANKH	SLC22A4
CELLULAR_CARBOHYDRATE_METABOLIC_PROCESS	CELLULAR_CARBOHYDRATE_METABOLIC_PROCESS	0.158341	0.711167	320	123	2	CHST8	GCNT2
JAK_STAT_CASCADE	JAK_STAT_CASCADE	0.159149	0.711167	320	30	1	CCR2
MONOOXYGENASE_ACTIVITY	MONOOXYGENASE_ACTIVITY	0.159149	0.711167	320	30	1	CYP4F3
PATTERN_SPECIFICATION_PROCESS	PATTERN_SPECIFICATION_PROCESS	0.159149	0.711167	320	30	1	TBX3
PROTEIN_AMINO_ACID_N_LINKED_GLYCOSYLATION	PROTEIN_AMINO_ACID_N_LINKED_GLYCOSYLATION	0.159149	0.711167	320	30	1	TSPAN7
REACTOME_DAG_AND_IP3_SIGNALING	REACTOME_DAG_AND_IP3_SIGNALING	0.159149	0.711167	320	30	1	PRKAR2B
REACTOME_REGULATION_OF_BETA_CELL_DEVELOPMENT	REACTOME_REGULATION_OF_BETA_CELL_DEVELOPMENT	0.159149	0.711167	320	30	1	INSM1
REACTOME_SYNTHESIS_OF_PIPS_AT_THE_PLASMA_MEMBRANE	REACTOME_SYNTHESIS_OF_PIPS_AT_THE_PLASMA_MEMBRANE	0.159149	0.711167	320	30	1	PIK3C2G
REGULATION_OF_GENE_EXPRESSION_EPIGENETIC	REGULATION_OF_GENE_EXPRESSION_EPIGENETIC	0.159149	0.711167	320	30	1	GPX1
SKELETAL_MUSCLE_DEVELOPMENT	SKELETAL_MUSCLE_DEVELOPMENT	0.159149	0.711167	320	30	1	TBX3
TISSUE_REMODELING	TISSUE_REMODELING	0.159149	0.711167	320	30	1	ANKH
VIRAL_INFECTIOUS_CYCLE	VIRAL_INFECTIOUS_CYCLE	0.159149	0.711167	320	30	1	RSF1
GTPASE_REGULATOR_ACTIVITY	GTPASE_REGULATOR_ACTIVITY	0.160359	0.715211	320	124	2	DOCK2	IQGAP2
POSITIVE_REGULATION_OF_SIGNAL_TRANSDUCTION	POSITIVE_REGULATION_OF_SIGNAL_TRANSDUCTION	0.162381	0.722858	320	125	2	ECM1	HMOX1
BIOCARTA_NO1_PATHWAY	BIOCARTA_NO1_PATHWAY	0.163994	0.723179	320	31	1	PRKAR2B
GROWTH_FACTOR_BINDING	GROWTH_FACTOR_BINDING	0.163994	0.723179	320	31	1	IL1R1
KEGG_GLYCINE_SERINE_AND_THREONINE_METABOLISM	KEGG_GLYCINE_SERINE_AND_THREONINE_METABOLISM	0.163994	0.723179	320	31	1	MAOB
REACTOME_LATENT_INFECTION_OF_HOMO_SAPIENS_WITH_MYCOBACTERIUM_TUBERCULOSIS	REACTOME_LATENT_INFECTION_OF_HOMO_SAPIENS_WITH_MYCOBACTERIUM_TUBERCULOSIS	0.163994	0.723179	320	31	1	CAMP
RESPONSE_TO_BACTERIUM	RESPONSE_TO_BACTERIUM	0.163994	0.723179	320	31	1	CAMP
HORMONE_METABOLIC_PROCESS	HORMONE_METABOLIC_PROCESS	0.168812	0.738869	320	32	1	CHST8
HUMORAL_IMMUNE_RESPONSE	HUMORAL_IMMUNE_RESPONSE	0.168812	0.738869	320	32	1	BCL2
MITOCHONDRIAL_PART	MITOCHONDRIAL_PART	0.168476	0.738869	320	128	2	BCL2	MAOB
REACTOME_FACTORS_INVOLVED_IN_MEGAKARYOCYTE_DEVELOPMENT_AND_PLATELET_PRODUCTION	REACTOME_FACTORS_INVOLVED_IN_MEGAKARYOCYTE_DEVELOPMENT_AND_PLATELET_PRODUCTION	0.168476	0.738869	320	128	2	DOCK2	PRKAR2B
BIOCARTA_DEATH_PATHWAY	BIOCARTA_DEATH_PATHWAY	0.173603	0.741843	320	33	1	BCL2
CALCIUM_CHANNEL_ACTIVITY	CALCIUM_CHANNEL_ACTIVITY	0.173603	0.741843	320	33	1	CACNA1C
DNA_DAMAGE_RESPONSESIGNAL_TRANSDUCTION	DNA_DAMAGE_RESPONSESIGNAL_TRANSDUCTION	0.173603	0.741843	320	33	1	CIDEB
HEMATOPOIETIN_INTERFERON_CLASSD200_DOMAIN_CYTOKINE_RECEPTOR_ACTIVITY	HEMATOPOIETIN_INTERFERON_CLASSD200_DOMAIN_CYTOKINE_RECEPTOR_ACTIVITY	0.173603	0.741843	320	33	1	IL1R1
LIPOPROTEIN_METABOLIC_PROCESS	LIPOPROTEIN_METABOLIC_PROCESS	0.173603	0.741843	320	33	1	NPC1L1
MICROTUBULE_BINDING	MICROTUBULE_BINDING	0.173603	0.741843	320	33	1	DCX
MONOVALENT_INORGANIC_CATION_TRANSMEMBRANE_TRANSPORTER_ACTIVITY	MONOVALENT_INORGANIC_CATION_TRANSMEMBRANE_TRANSPORTER_ACTIVITY	0.173603	0.741843	320	33	1	ABCC8
REACTOME_GLUCAGON_SIGNALING_IN_METABOLIC_REGULATION	REACTOME_GLUCAGON_SIGNALING_IN_METABOLIC_REGULATION	0.173603	0.741843	320	33	1	PRKAR2B
REACTOME_ION_TRANSPORT_BY_P_TYPE_ATPASES	REACTOME_ION_TRANSPORT_BY_P_TYPE_ATPASES	0.173603	0.741843	320	33	1	ATP2B2
REACTOME_POST_NMDA_RECEPTOR_ACTIVATION_EVENTS	REACTOME_POST_NMDA_RECEPTOR_ACTIVATION_EVENTS	0.173603	0.741843	320	33	1	RPS6KA6
REACTOME_PURINE_METABOLISM	REACTOME_PURINE_METABOLISM	0.173603	0.741843	320	33	1	GPX1
RECEPTOR_MEDIATED_ENDOCYTOSIS	RECEPTOR_MEDIATED_ENDOCYTOSIS	0.173603	0.741843	320	33	1	LRP2
RESPONSE_TO_EXTRACELLULAR_STIMULUS	RESPONSE_TO_EXTRACELLULAR_STIMULUS	0.173603	0.741843	320	33	1	SSTR2
AMINE_RECEPTOR_ACTIVITY	AMINE_RECEPTOR_ACTIVITY	0.178365	0.751248	320	34	1	HRH3
KEGG_CYSTEINE_AND_METHIONINE_METABOLISM	KEGG_CYSTEINE_AND_METHIONINE_METABOLISM	0.178365	0.751248	320	34	1	TAT
REACTOME_ABC_FAMILY_PROTEINS_MEDIATED_TRANSPORT	REACTOME_ABC_FAMILY_PROTEINS_MEDIATED_TRANSPORT	0.178365	0.751248	320	34	1	ABCC8
REACTOME_DOWNSTREAM_TCR_SIGNALING	REACTOME_DOWNSTREAM_TCR_SIGNALING	0.178365	0.751248	320	34	1	HLA-DQA2
REACTOME_METABOLISM_OF_STEROID_HORMONES_AND_VITAMINS_A_AND_D	REACTOME_METABOLISM_OF_STEROID_HORMONES_AND_VITAMINS_A_AND_D	0.178365	0.751248	320	34	1	LRP2
REACTOME_NEUROTRANSMITTER_RELEASE_CYCLE	REACTOME_NEUROTRANSMITTER_RELEASE_CYCLE	0.178365	0.751248	320	34	1	SNAP25
TRANSCRIPTION_INITIATION	TRANSCRIPTION_INITIATION	0.178365	0.751248	320	34	1	RSF1
VIRAL_REPRODUCTIVE_PROCESS	VIRAL_REPRODUCTIVE_PROCESS	0.178365	0.751248	320	34	1	RSF1
REACTOME_NGF_SIGNALLING_VIA_TRKA_FROM_THE_PLASMA_MEMBRANE	REACTOME_NGF_SIGNALLING_VIA_TRKA_FROM_THE_PLASMA_MEMBRANE	0.178718	0.751384	320	133	2	PRKAR2B	SHC3
RHODOPSIN_LIKE_RECEPTOR_ACTIVITY	RHODOPSIN_LIKE_RECEPTOR_ACTIVITY	0.180778	0.75733	320	134	2	HRH3	SSTR2
SEXUAL_REPRODUCTION	SEXUAL_REPRODUCTION	0.180778	0.75733	320	134	2	MOV10L1	SPAG6
BIOCARTA_AGR_PATHWAY	BIOCARTA_AGR_PATHWAY	0.183101	0.75893	320	35	1	PAK6
BIOCARTA_GPCR_PATHWAY	BIOCARTA_GPCR_PATHWAY	0.183101	0.75893	320	35	1	PRKAR2B
DNA_PACKAGING	DNA_PACKAGING	0.183101	0.75893	320	35	1	RSF1
ISOMERASE_ACTIVITY	ISOMERASE_ACTIVITY	0.183101	0.75893	320	35	1	PTGIS
KEGG_ALLOGRAFT_REJECTION	KEGG_ALLOGRAFT_REJECTION	0.183101	0.75893	320	35	1	HLA-DQA2
REGULATION_OF_CELL_ADHESION	REGULATION_OF_CELL_ADHESION	0.183101	0.75893	320	35	1	CYTIP
BASEMENT_MEMBRANE	BASEMENT_MEMBRANE	0.187809	0.772982	320	36	1	SSPN
EXCRETION	EXCRETION	0.187809	0.772982	320	36	1	KCNJ1
IMMUNE_EFFECTOR_PROCESS	IMMUNE_EFFECTOR_PROCESS	0.187809	0.772982	320	36	1	BCL2
REACTOME_SIGNALLING_TO_ERKS	REACTOME_SIGNALLING_TO_ERKS	0.187809	0.772982	320	36	1	SHC3
BIOCARTA_FMLP_PATHWAY	BIOCARTA_FMLP_PATHWAY	0.19249	0.783996	320	37	1	PIK3C2G
CLATHRIN_COATED_VESICLE	CLATHRIN_COATED_VESICLE	0.19249	0.783996	320	37	1	SVOP
KEGG_GRAFT_VERSUS_HOST_DISEASE	KEGG_GRAFT_VERSUS_HOST_DISEASE	0.19249	0.783996	320	37	1	HLA-DQA2
NEGATIVE_REGULATION_OF_SIGNAL_TRANSDUCTION	NEGATIVE_REGULATION_OF_SIGNAL_TRANSDUCTION	0.19249	0.783996	320	37	1	AMBP
REACTOME_AMINE_LIGAND_BINDING_RECEPTORS	REACTOME_AMINE_LIGAND_BINDING_RECEPTORS	0.19249	0.783996	320	37	1	HRH3
REACTOME_GLYCOSPHINGOLIPID_METABOLISM	REACTOME_GLYCOSPHINGOLIPID_METABOLISM	0.19249	0.783996	320	37	1	ARSH
BIOCARTA_IL2RB_PATHWAY	BIOCARTA_IL2RB_PATHWAY	0.197144	0.796982	320	38	1	BCL2
KEGG_SNARE_INTERACTIONS_IN_VESICULAR_TRANSPORT	KEGG_SNARE_INTERACTIONS_IN_VESICULAR_TRANSPORT	0.197144	0.796982	320	38	1	SNAP25
ORGAN_MORPHOGENESIS	ORGAN_MORPHOGENESIS	0.197377	0.796982	320	142	2	TBX3	TMEM176B
PROTEIN_KINASE_REGULATOR_ACTIVITY	PROTEIN_KINASE_REGULATOR_ACTIVITY	0.197144	0.796982	320	38	1	PRKAR2B
REACTOME_BETA_DEFENSINS	REACTOME_BETA_DEFENSINS	0.197144	0.796982	320	38	1	CCR2
REACTOME_APOPTOSIS	REACTOME_APOPTOSIS	0.199465	0.80403	320	143	2	BCL2	UNC5B
CELL_CORTEX	CELL_CORTEX	0.201772	0.805029	320	39	1	CYTIP
KEGG_LYSINE_DEGRADATION	KEGG_LYSINE_DEGRADATION	0.201772	0.805029	320	39	1	BBOX1
LIGAND_GATED_CHANNEL_ACTIVITY	LIGAND_GATED_CHANNEL_ACTIVITY	0.201772	0.805029	320	39	1	CHRNB2
PROTEIN_OLIGOMERIZATION	PROTEIN_OLIGOMERIZATION	0.201772	0.805029	320	39	1	TGM3
STRIATED_MUSCLE_DEVELOPMENT	STRIATED_MUSCLE_DEVELOPMENT	0.201772	0.805029	320	39	1	TBX3
VIRAL_REPRODUCTION	VIRAL_REPRODUCTION	0.201772	0.805029	320	39	1	RSF1
KEGG_ALZHEIMERS_DISEASE	KEGG_ALZHEIMERS_DISEASE	0.20365	0.811141	320	145	2	CACNA1C	NDUFC2
NUCLEOTIDE_METABOLIC_PROCESS	NUCLEOTIDE_METABOLIC_PROCESS	0.206373	0.819206	320	40	1	FHIT
REGULATION_OF_SECRETION	REGULATION_OF_SECRETION	0.206373	0.819206	320	40	1	SNAP25
MICROTUBULE_CYTOSKELETON	MICROTUBULE_CYTOSKELETON	0.207844	0.823652	320	147	2	DCX	MARK1
BIOCARTA_CHREBP2_PATHWAY	BIOCARTA_CHREBP2_PATHWAY	0.210947	0.828949	320	41	1	PRKAR2B
POSITIVE_REGULATION_OF_CELL_PROLIFERATION	POSITIVE_REGULATION_OF_CELL_PROLIFERATION	0.209944	0.828949	320	148	2	FLT3	TBX3
PROTEASE_INHIBITOR_ACTIVITY	PROTEASE_INHIBITOR_ACTIVITY	0.210947	0.828949	320	41	1	AMBP
REACTOME_PLC_BETA_MEDIATED_EVENTS	REACTOME_PLC_BETA_MEDIATED_EVENTS	0.210947	0.828949	320	41	1	PRKAR2B
UDP_GLYCOSYLTRANSFERASE_ACTIVITY	UDP_GLYCOSYLTRANSFERASE_ACTIVITY	0.210947	0.828949	320	41	1	GCNT2
KEGG_WNT_SIGNALING_PATHWAY	KEGG_WNT_SIGNALING_PATHWAY	0.212047	0.831877	320	149	2	CXXC4	WNT11
TRANSCRIPTION_REPRESSOR_ACTIVITY	TRANSCRIPTION_REPRESSOR_ACTIVITY	0.214152	0.838731	320	150	2	RSF1	TBX3
CHEMOKINE_RECEPTOR_BINDING	CHEMOKINE_RECEPTOR_BINDING	0.215495	0.841185	320	42	1	CCR2
REACTOME_DEADENYLATION_DEPENDENT_MRNA_DECAY	REACTOME_DEADENYLATION_DEPENDENT_MRNA_DECAY	0.215495	0.841185	320	42	1	LSM1
KEGG_GLYCEROLIPID_METABOLISM	KEGG_GLYCEROLIPID_METABOLISM	0.220018	0.854571	320	43	1	AWAT2
REACTOME_REGULATION_OF_WATER_BALANCE_BY_RENAL_AQUAPORINS	REACTOME_REGULATION_OF_WATER_BALANCE_BY_RENAL_AQUAPORINS	0.220018	0.854571	320	43	1	PRKAR2B
SH3_SH2_ADAPTOR_ACTIVITY	SH3_SH2_ADAPTOR_ACTIVITY	0.220018	0.854571	320	43	1	IRS4
JNK_CASCADE	JNK_CASCADE	0.224514	0.867725	320	44	1	AMBP
KEGG_ABC_TRANSPORTERS	KEGG_ABC_TRANSPORTERS	0.224514	0.867725	320	44	1	ABCC8
RESPONSE_TO_OXIDATIVE_STRESS	RESPONSE_TO_OXIDATIVE_STRESS	0.224514	0.867725	320	44	1	GCLM
ENVELOPE	ENVELOPE	0.226818	0.873753	320	156	2	BCL2	MAOB
ORGANELLE_ENVELOPE	ORGANELLE_ENVELOPE	0.226818	0.873753	320	156	2	BCL2	MAOB
COATED_VESICLE	COATED_VESICLE	0.228984	0.879208	320	45	1	SVOP
KINASE_REGULATOR_ACTIVITY	KINASE_REGULATOR_ACTIVITY	0.228984	0.879208	320	45	1	PRKAR2B
BIOCARTA_KERATINOCYTE_PATHWAY	BIOCARTA_KERATINOCYTE_PATHWAY	0.233428	0.88469	320	46	1	BCL2
GTP_BINDING	GTP_BINDING	0.233428	0.88469	320	46	1	TGM3
GUANYL_NUCLEOTIDE_EXCHANGE_FACTOR_ACTIVITY	GUANYL_NUCLEOTIDE_EXCHANGE_FACTOR_ACTIVITY	0.233428	0.88469	320	46	1	DOCK2
HYDROLASE_ACTIVITY_ACTING_ON_CARBON_NITROGEN_NOT_PEPTIDEBONDS	HYDROLASE_ACTIVITY_ACTING_ON_CARBON_NITROGEN_NOT_PEPTIDEBONDS	0.233428	0.88469	320	46	1	CRMP1
KEGG_INTESTINAL_IMMUNE_NETWORK_FOR_IGA_PRODUCTION	KEGG_INTESTINAL_IMMUNE_NETWORK_FOR_IGA_PRODUCTION	0.233428	0.88469	320	46	1	HLA-DQA2
RESPONSE_TO_LIGHT_STIMULUS	RESPONSE_TO_LIGHT_STIMULUS	0.233428	0.88469	320	46	1	GPX1
RESPONSE_TO_VIRUS	RESPONSE_TO_VIRUS	0.233428	0.88469	320	46	1	BCL2
STRESS_ACTIVATED_PROTEIN_KINASE_SIGNALING_PATHWAY	STRESS_ACTIVATED_PROTEIN_KINASE_SIGNALING_PATHWAY	0.233428	0.88469	320	46	1	AMBP
GUANYL_NUCLEOTIDE_BINDING	GUANYL_NUCLEOTIDE_BINDING	0.237847	0.885698	320	47	1	TGM3
KEGG_HUNTINGTONS_DISEASE	KEGG_HUNTINGTONS_DISEASE	0.237414	0.885698	320	161	2	GPX1	NDUFC2
KEGG_NOTCH_SIGNALING_PATHWAY	KEGG_NOTCH_SIGNALING_PATHWAY	0.237847	0.885698	320	47	1	DLL3
MICROBODY	MICROBODY	0.237847	0.885698	320	47	1	AGPS
MICROTUBULE_ASSOCIATED_COMPLEX	MICROTUBULE_ASSOCIATED_COMPLEX	0.237847	0.885698	320	47	1	DCX
MULTI_ORGANISM_PROCESS	MULTI_ORGANISM_PROCESS	0.235292	0.885698	320	160	2	BCL2	CAMP
PEROXISOME	PEROXISOME	0.237847	0.885698	320	47	1	AGPS
REACTOME_DEFENSINS	REACTOME_DEFENSINS	0.237847	0.885698	320	47	1	CCR2
REACTOME_PI_METABOLISM	REACTOME_PI_METABOLISM	0.237847	0.885698	320	47	1	PIK3C2G
REGULATION_OF_DNA_BINDING	REGULATION_OF_DNA_BINDING	0.237847	0.885698	320	47	1	RSF1
TUBULIN_BINDING	TUBULIN_BINDING	0.237847	0.885698	320	47	1	DCX
CYTOKINE_BINDING	CYTOKINE_BINDING	0.242241	0.896368	320	48	1	IL1R1
G_PROTEIN_COUPLED_RECEPTOR_ACTIVITY	G_PROTEIN_COUPLED_RECEPTOR_ACTIVITY	0.241659	0.896368	320	163	2	HRH3	SSTR2
INTEGRAL_TO_ORGANELLE_MEMBRANE	INTEGRAL_TO_ORGANELLE_MEMBRANE	0.242241	0.896368	320	48	1	RTN1
PROTEIN_DNA_COMPLEX_ASSEMBLY	PROTEIN_DNA_COMPLEX_ASSEMBLY	0.242241	0.896368	320	48	1	RSF1
MOLECULAR_ADAPTOR_ACTIVITY	MOLECULAR_ADAPTOR_ACTIVITY	0.246609	0.906811	320	49	1	IRS4
NUCLEAR_MEMBRANE	NUCLEAR_MEMBRANE	0.246609	0.906811	320	49	1	BCL2
REACTOME_AMINO_ACID_AND_OLIGOPEPTIDE_SLC_TRANSPORTERS	REACTOME_AMINO_ACID_AND_OLIGOPEPTIDE_SLC_TRANSPORTERS	0.246609	0.906811	320	49	1	SLC5A8
REACTOME_FATTY_ACID_TRIACYLGLYCEROL_AND_KETONE_BODY_METABOLISM	REACTOME_FATTY_ACID_TRIACYLGLYCEROL_AND_KETONE_BODY_METABOLISM	0.245908	0.906811	320	165	2	ARNTL	RORA
BRAIN_DEVELOPMENT	BRAIN_DEVELOPMENT	0.250953	0.914184	320	50	1	CNTN4
INTRINSIC_TO_ORGANELLE_MEMBRANE	INTRINSIC_TO_ORGANELLE_MEMBRANE	0.250953	0.914184	320	50	1	RTN1
KEGG_AUTOIMMUNE_THYROID_DISEASE	KEGG_AUTOIMMUNE_THYROID_DISEASE	0.250953	0.914184	320	50	1	HLA-DQA2
NUCLEOBASENUCLEOSIDE_AND_NUCLEOTIDE_METABOLIC_PROCESS	NUCLEOBASENUCLEOSIDE_AND_NUCLEOTIDE_METABOLIC_PROCESS	0.250953	0.914184	320	50	1	FHIT
REACTOME_AQUAPORIN_MEDIATED_TRANSPORT	REACTOME_AQUAPORIN_MEDIATED_TRANSPORT	0.250953	0.914184	320	50	1	PRKAR2B
REACTOME_TCR_SIGNALING	REACTOME_TCR_SIGNALING	0.250953	0.914184	320	50	1	HLA-DQA2
KEGG_ARGININE_AND_PROLINE_METABOLISM	KEGG_ARGININE_AND_PROLINE_METABOLISM	0.255271	0.925603	320	51	1	MAOB
KEGG_DRUG_METABOLISM_OTHER_ENZYMES	KEGG_DRUG_METABOLISM_OTHER_ENZYMES	0.255271	0.925603	320	51	1	UGT1A4
REACTOME_CELL_CELL_JUNCTION_ORGANIZATION	REACTOME_CELL_CELL_JUNCTION_ORGANIZATION	0.255271	0.925603	320	51	1	CDH2
RNA_PROCESSING	RNA_PROCESSING	0.25867	0.93648	320	171	2	LSM1	NOVA1
KEGG_STARCH_AND_SUCROSE_METABOLISM	KEGG_STARCH_AND_SUCROSE_METABOLISM	0.259564	0.936827	320	52	1	UGT1A4
REACTOME_GABA_RECEPTOR_ACTIVATION	REACTOME_GABA_RECEPTOR_ACTIVATION	0.259564	0.936827	320	52	1	GABRB3
TRANSCRIPTION_ACTIVATOR_ACTIVITY	TRANSCRIPTION_ACTIVATOR_ACTIVITY	0.262926	0.947504	320	173	2	RSF1	TFAP2B
PEPTIDE_RECEPTOR_ACTIVITY	PEPTIDE_RECEPTOR_ACTIVITY	0.263833	0.94786	320	53	1	SSTR2
RECEPTOR_COMPLEX	RECEPTOR_COMPLEX	0.263833	0.94786	320	53	1	CHRNB2
BIOCARTA_NFAT_PATHWAY	BIOCARTA_NFAT_PATHWAY	0.268077	0.958703	320	54	1	PRKAR2B
CHROMATIN_MODIFICATION	CHROMATIN_MODIFICATION	0.268077	0.958703	320	54	1	RSF1
KEGG_INOSITOL_PHOSPHATE_METABOLISM	KEGG_INOSITOL_PHOSPHATE_METABOLISM	0.268077	0.958703	320	54	1	PIK3C2G
KEGG_CALCIUM_SIGNALING_PATHWAY	KEGG_CALCIUM_SIGNALING_PATHWAY	0.269311	0.960189	320	176	2	ATP2B2	CACNA1C
KEGG_ENDOCYTOSIS	KEGG_ENDOCYTOSIS	0.269311	0.960189	320	176	2	FGFR4	RAB11FIP1
CARBOHYDRATE_METABOLIC_PROCESS	CARBOHYDRATE_METABOLIC_PROCESS	0.271439	0.964969	320	177	2	CHST8	GCNT2
GROWTH_FACTOR_ACTIVITY	GROWTH_FACTOR_ACTIVITY	0.272297	0.964969	320	55	1	IL1RN
KEGG_BASAL_CELL_CARCINOMA	KEGG_BASAL_CELL_CARCINOMA	0.272297	0.964969	320	55	1	WNT11
PROTEIN_FOLDING	PROTEIN_FOLDING	0.272297	0.964969	320	55	1	BAG4
ACID_AMINO_ACID_LIGASE_ACTIVITY	ACID_AMINO_ACID_LIGASE_ACTIVITY	0.276493	0.972492	320	56	1	GCLM
EMBRYONIC_DEVELOPMENT	EMBRYONIC_DEVELOPMENT	0.276493	0.972492	320	56	1	TBX3
EXTRACELLULAR_MATRIX_PART	EXTRACELLULAR_MATRIX_PART	0.276493	0.972492	320	56	1	SSPN
REACTOME_LOSS_OF_NLP_FROM_MITOTIC_CENTROSOMES	REACTOME_LOSS_OF_NLP_FROM_MITOTIC_CENTROSOMES	0.276493	0.972492	320	56	1	PRKAR2B
REGULATION_OF_BODY_FLUID_LEVELS	REGULATION_OF_BODY_FLUID_LEVELS	0.276493	0.972492	320	56	1	SLC22A4
RNA_POLYMERASE_II_TRANSCRIPTION_FACTOR_ACTIVITY	RNA_POLYMERASE_II_TRANSCRIPTION_FACTOR_ACTIVITY	0.277823	0.975706	320	180	2	SOX15	TBX3
BIOCARTA_PPARA_PATHWAY	BIOCARTA_PPARA_PATHWAY	0.280664	0.978363	320	57	1	PRKAR2B
INORGANIC_CATION_TRANSMEMBRANE_TRANSPORTER_ACTIVITY	INORGANIC_CATION_TRANSMEMBRANE_TRANSPORTER_ACTIVITY	0.280664	0.978363	320	57	1	ABCC8
KEGG_RNA_DEGRADATION	KEGG_RNA_DEGRADATION	0.280664	0.978363	320	57	1	LSM1
OXIDOREDUCTASE_ACTIVITY_GO_0016616	OXIDOREDUCTASE_ACTIVITY_GO_0016616	0.280664	0.978363	320	57	1	AKR7A3
REACTOME_REGULATION_OF_APOPTOSIS	REACTOME_REGULATION_OF_APOPTOSIS	0.280664	0.978363	320	57	1	UNC5B
3_5_EXONUCLEASE_ACTIVITY	3_5_EXONUCLEASE_ACTIVITY	1	1	320	12	0
ACETYLGALACTOSAMINYLTRANSFERASE_ACTIVITY	ACETYLGALACTOSAMINYLTRANSFERASE_ACTIVITY	1	1	320	12	0
ACETYLTRANSFERASE_ACTIVITY	ACETYLTRANSFERASE_ACTIVITY	1	1	320	25	0
ACTIN_CYTOSKELETON_ORGANIZATION_AND_BIOGENESIS	ACTIN_CYTOSKELETON_ORGANIZATION_AND_BIOGENESIS	0.45191	1	320	104	1	DOCK2
ACTIN_FILAMENT	ACTIN_FILAMENT	1	1	320	18	0
ACTIN_FILAMENT_BASED_MOVEMENT	ACTIN_FILAMENT_BASED_MOVEMENT	1	1	320	10	0
ACTIN_FILAMENT_BASED_PROCESS	ACTIN_FILAMENT_BASED_PROCESS	0.482732	1	320	114	1	DOCK2
ACTIN_FILAMENT_BUNDLE_FORMATION	ACTIN_FILAMENT_BUNDLE_FORMATION	1	1	320	12	0
ACTIN_FILAMENT_ORGANIZATION	ACTIN_FILAMENT_ORGANIZATION	1	1	320	23	0
ACTIN_FILAMENT_POLYMERIZATION	ACTIN_FILAMENT_POLYMERIZATION	1	1	320	14	0
ACTIN_POLYMERIZATION_AND_OR_DEPOLYMERIZATION	ACTIN_POLYMERIZATION_AND_OR_DEPOLYMERIZATION	1	1	320	23	0
ACTIVATION_OF_IMMUNE_RESPONSE	ACTIVATION_OF_IMMUNE_RESPONSE	1	1	320	17	0
ACTIVATION_OF_JNK_ACTIVITY	ACTIVATION_OF_JNK_ACTIVITY	1	1	320	13	0
ACTIVATION_OF_MAPK_ACTIVITY	ACTIVATION_OF_MAPK_ACTIVITY	1	1	320	38	0
ACTIVATION_OF_NF_KAPPAB_TRANSCRIPTION_FACTOR	ACTIVATION_OF_NF_KAPPAB_TRANSCRIPTION_FACTOR	1	1	320	18	0
ACTIVATION_OF_PROTEIN_KINASE_ACTIVITY	ACTIVATION_OF_PROTEIN_KINASE_ACTIVITY	1	1	320	26	0
ACUTE_INFLAMMATORY_RESPONSE	ACUTE_INFLAMMATORY_RESPONSE	1	1	320	11	0
ADAPTIVE_IMMUNE_RESPONSE	ADAPTIVE_IMMUNE_RESPONSE	1	1	320	25	0
ADAPTIVE_IMMUNE_RESPONSE_GO_0002460	ADAPTIVE_IMMUNE_RESPONSE_GO_0002460	1	1	320	24	0
ADENYLATE_CYCLASE_ACTIVATION	ADENYLATE_CYCLASE_ACTIVATION	1	1	320	19	0
ADHERENS_JUNCTION	ADHERENS_JUNCTION	1	1	320	23	0
ADP_BINDING	ADP_BINDING	1	1	320	11	0
AEROBIC_RESPIRATION	AEROBIC_RESPIRATION	1	1	320	15	0
AMINE_TRANSMEMBRANE_TRANSPORTER_ACTIVITY	AMINE_TRANSMEMBRANE_TRANSPORTER_ACTIVITY	1	1	320	41	0
AMINE_TRANSPORT	AMINE_TRANSPORT	1	1	320	38	0
AMINO_ACID_TRANSMEMBRANE_TRANSPORTER_ACTIVITY	AMINO_ACID_TRANSMEMBRANE_TRANSPORTER_ACTIVITY	1	1	320	29	0
AMINO_ACID_TRANSPORT	AMINO_ACID_TRANSPORT	1	1	320	26	0
AMINO_SUGAR_METABOLIC_PROCESS	AMINO_SUGAR_METABOLIC_PROCESS	1	1	320	18	0
AMINOPEPTIDASE_ACTIVITY	AMINOPEPTIDASE_ACTIVITY	1	1	320	14	0
AMYLOID_PRECURSOR_PROTEIN_METABOLIC_PROCESS	AMYLOID_PRECURSOR_PROTEIN_METABOLIC_PROCESS	1	1	320	10	0
ANATOMICAL_STRUCTURE_FORMATION	ANATOMICAL_STRUCTURE_FORMATION	1	1	320	54	0
ANCHORED_TO_MEMBRANE	ANCHORED_TO_MEMBRANE	1	1	320	13	0
ANCHORED_TO_PLASMA_MEMBRANE	ANCHORED_TO_PLASMA_MEMBRANE	1	1	320	13	0
ANDROGEN_RECEPTOR_SIGNALING_PATHWAY	ANDROGEN_RECEPTOR_SIGNALING_PATHWAY	1	1	320	12	0
ANGIOGENESIS	ANGIOGENESIS	1	1	320	46	0
ANION_CATION_SYMPORTER_ACTIVITY	ANION_CATION_SYMPORTER_ACTIVITY	1	1	320	16	0
ANION_TRANSPORT	ANION_TRANSPORT	1	1	320	31	0
ANTIGEN_BINDING	ANTIGEN_BINDING	1	1	320	27	0
ANTIPORTER_ACTIVITY	ANTIPORTER_ACTIVITY	1	1	320	10	0
APICAL_JUNCTION_COMPLEX	APICAL_JUNCTION_COMPLEX	1	1	320	34	0
APICAL_PART_OF_CELL	APICAL_PART_OF_CELL	1	1	320	17	0
APICAL_PLASMA_MEMBRANE	APICAL_PLASMA_MEMBRANE	1	1	320	14	0
APICOLATERAL_PLASMA_MEMBRANE	APICOLATERAL_PLASMA_MEMBRANE	1	1	320	34	0
APOPTOTIC_NUCLEAR_CHANGES	APOPTOTIC_NUCLEAR_CHANGES	1	1	320	19	0
APOPTOTIC_PROGRAM	APOPTOTIC_PROGRAM	0.288936	1	320	59	1	GPX1
ATP_DEPENDENT_DNA_HELICASE_ACTIVITY	ATP_DEPENDENT_DNA_HELICASE_ACTIVITY	1	1	320	11	0
ATP_DEPENDENT_HELICASE_ACTIVITY	ATP_DEPENDENT_HELICASE_ACTIVITY	1	1	320	27	0
ATP_DEPENDENT_RNA_HELICASE_ACTIVITY	ATP_DEPENDENT_RNA_HELICASE_ACTIVITY	1	1	320	17	0
ATPASE_ACTIVITY	ATPASE_ACTIVITY	0.473671	1	320	111	1	RSF1
ATPASE_ACTIVITY_COUPLED	ATPASE_ACTIVITY_COUPLED	1	1	320	93	0
ATPASE_ACTIVITY_COUPLED_TO_MOVEMENT_OF_SUBSTANCES	ATPASE_ACTIVITY_COUPLED_TO_MOVEMENT_OF_SUBSTANCES	1	1	320	40	0
ATPASE_ACTIVITY_COUPLED_TO_TRANSMEMBRANE_MOVEMENT_OF_IONS	ATPASE_ACTIVITY_COUPLED_TO_TRANSMEMBRANE_MOVEMENT_OF_IONS	1	1	320	24	0
ATPASE_ACTIVITY_COUPLED_TO_TRANSMEMBRANE_MOVEMENT_OF_IONS_PHOSPHORYLATIVE_MECHANISM	ATPASE_ACTIVITY_COUPLED_TO_TRANSMEMBRANE_MOVEMENT_OF_IONS_PHOSPHORYLATIVE_MECHANISM	1	1	320	20	0
AUXILIARY_TRANSPORT_PROTEIN_ACTIVITY	AUXILIARY_TRANSPORT_PROTEIN_ACTIVITY	1	1	320	25	0
B_CELL_ACTIVATION	B_CELL_ACTIVATION	1	1	320	20	0
B_CELL_DIFFERENTIATION	B_CELL_DIFFERENTIATION	1	1	320	12	0
BASE_EXCISION_REPAIR	BASE_EXCISION_REPAIR	1	1	320	17	0
BASOLATERAL_PLASMA_MEMBRANE	BASOLATERAL_PLASMA_MEMBRANE	1	1	320	34	0
BETA_TUBULIN_BINDING	BETA_TUBULIN_BINDING	1	1	320	10	0
BILE_ACID_METABOLIC_PROCESS	BILE_ACID_METABOLIC_PROCESS	1	1	320	11	0
BIOCARTA_41BB_PATHWAY	BIOCARTA_41BB_PATHWAY	1	1	320	17	0
BIOCARTA_ACE2_PATHWAY	BIOCARTA_ACE2_PATHWAY	1	1	320	13	0
BIOCARTA_ACH_PATHWAY	BIOCARTA_ACH_PATHWAY	1	1	320	16	0
BIOCARTA_ACTINY_PATHWAY	BIOCARTA_ACTINY_PATHWAY	1	1	320	20	0
BIOCARTA_AHSP_PATHWAY	BIOCARTA_AHSP_PATHWAY	1	1	320	13	0
BIOCARTA_AKT_PATHWAY	BIOCARTA_AKT_PATHWAY	1	1	320	22	0
BIOCARTA_ALK_PATHWAY	BIOCARTA_ALK_PATHWAY	1	1	320	37	0
BIOCARTA_AMI_PATHWAY	BIOCARTA_AMI_PATHWAY	1	1	320	20	0
BIOCARTA_ARAP_PATHWAY	BIOCARTA_ARAP_PATHWAY	1	1	320	17	0
BIOCARTA_ARENRF2_PATHWAY	BIOCARTA_ARENRF2_PATHWAY	1	1	320	13	0
BIOCARTA_ARF_PATHWAY	BIOCARTA_ARF_PATHWAY	1	1	320	17	0
BIOCARTA_ASBCELL_PATHWAY	BIOCARTA_ASBCELL_PATHWAY	1	1	320	12	0
BIOCARTA_AT1R_PATHWAY	BIOCARTA_AT1R_PATHWAY	1	1	320	33	0
BIOCARTA_ATM_PATHWAY	BIOCARTA_ATM_PATHWAY	1	1	320	19	0
BIOCARTA_ATRBRCA_PATHWAY	BIOCARTA_ATRBRCA_PATHWAY	1	1	320	20	0
BIOCARTA_BARR_MAPK_PATHWAY	BIOCARTA_BARR_MAPK_PATHWAY	1	1	320	12	0
BIOCARTA_BARRESTIN_PATHWAY	BIOCARTA_BARRESTIN_PATHWAY	1	1	320	10	0
BIOCARTA_BARRESTIN_SRC_PATHWAY	BIOCARTA_BARRESTIN_SRC_PATHWAY	1	1	320	15	0
BIOCARTA_BCELLSURVIVAL_PATHWAY	BIOCARTA_BCELLSURVIVAL_PATHWAY	1	1	320	16	0
BIOCARTA_BCR_PATHWAY	BIOCARTA_BCR_PATHWAY	1	1	320	35	0
BIOCARTA_BIOPEPTIDES_PATHWAY	BIOCARTA_BIOPEPTIDES_PATHWAY	1	1	320	43	0
BIOCARTA_BLYMPHOCYTE_PATHWAY	BIOCARTA_BLYMPHOCYTE_PATHWAY	1	1	320	11	0
BIOCARTA_CACAM_PATHWAY	BIOCARTA_CACAM_PATHWAY	1	1	320	14	0
BIOCARTA_CARDIACEGF_PATHWAY	BIOCARTA_CARDIACEGF_PATHWAY	1	1	320	18	0
BIOCARTA_CARM_ER_PATHWAY	BIOCARTA_CARM_ER_PATHWAY	1	1	320	35	0
BIOCARTA_CASPASE_PATHWAY	BIOCARTA_CASPASE_PATHWAY	1	1	320	23	0
BIOCARTA_CBL_PATHWAY	BIOCARTA_CBL_PATHWAY	1	1	320	13	0
BIOCARTA_CCR5_PATHWAY	BIOCARTA_CCR5_PATHWAY	1	1	320	18	0
BIOCARTA_CD40_PATHWAY	BIOCARTA_CD40_PATHWAY	1	1	320	14	0
BIOCARTA_CDC42RAC_PATHWAY	BIOCARTA_CDC42RAC_PATHWAY	1	1	320	16	0
BIOCARTA_CDK5_PATHWAY	BIOCARTA_CDK5_PATHWAY	1	1	320	11	0
BIOCARTA_CDMAC_PATHWAY	BIOCARTA_CDMAC_PATHWAY	1	1	320	16	0
BIOCARTA_CELL2CELL_PATHWAY	BIOCARTA_CELL2CELL_PATHWAY	1	1	320	14	0
BIOCARTA_CELLCYCLE_PATHWAY	BIOCARTA_CELLCYCLE_PATHWAY	1	1	320	23	0
BIOCARTA_CLASSIC_PATHWAY	BIOCARTA_CLASSIC_PATHWAY	1	1	320	14	0
BIOCARTA_COMP_PATHWAY	BIOCARTA_COMP_PATHWAY	1	1	320	19	0
BIOCARTA_CTCF_PATHWAY	BIOCARTA_CTCF_PATHWAY	1	1	320	23	0
BIOCARTA_CTL_PATHWAY	BIOCARTA_CTL_PATHWAY	1	1	320	13	0
BIOCARTA_CTLA4_PATHWAY	BIOCARTA_CTLA4_PATHWAY	1	1	320	19	0
BIOCARTA_CYTOKINE_PATHWAY	BIOCARTA_CYTOKINE_PATHWAY	1	1	320	20	0
BIOCARTA_D4GDI_PATHWAY	BIOCARTA_D4GDI_PATHWAY	1	1	320	13	0
BIOCARTA_DC_PATHWAY	BIOCARTA_DC_PATHWAY	1	1	320	22	0
BIOCARTA_DNAFRAGMENT_PATHWAY	BIOCARTA_DNAFRAGMENT_PATHWAY	1	1	320	10	0
BIOCARTA_ECM_PATHWAY	BIOCARTA_ECM_PATHWAY	1	1	320	24	0
BIOCARTA_EDG1_PATHWAY	BIOCARTA_EDG1_PATHWAY	1	1	320	27	0
BIOCARTA_EGF_PATHWAY	BIOCARTA_EGF_PATHWAY	1	1	320	31	0
BIOCARTA_EGFR_SMRTE_PATHWAY	BIOCARTA_EGFR_SMRTE_PATHWAY	1	1	320	11	0
BIOCARTA_EIF2_PATHWAY	BIOCARTA_EIF2_PATHWAY	1	1	320	11	0
BIOCARTA_EIF_PATHWAY	BIOCARTA_EIF_PATHWAY	1	1	320	16	0
BIOCARTA_EPHA4_PATHWAY	BIOCARTA_EPHA4_PATHWAY	1	1	320	10	0
BIOCARTA_EPO_PATHWAY	BIOCARTA_EPO_PATHWAY	1	1	320	19	0
BIOCARTA_EPONFKB_PATHWAY	BIOCARTA_EPONFKB_PATHWAY	1	1	320	11	0
BIOCARTA_ERK5_PATHWAY	BIOCARTA_ERK5_PATHWAY	1	1	320	17	0
BIOCARTA_ERK_PATHWAY	BIOCARTA_ERK_PATHWAY	1	1	320	28	0
BIOCARTA_ETC_PATHWAY	BIOCARTA_ETC_PATHWAY	1	1	320	10	0
BIOCARTA_ETS_PATHWAY	BIOCARTA_ETS_PATHWAY	1	1	320	18	0
BIOCARTA_EXTRINSIC_PATHWAY	BIOCARTA_EXTRINSIC_PATHWAY	1	1	320	13	0
BIOCARTA_FAS_PATHWAY	BIOCARTA_FAS_PATHWAY	1	1	320	30	0
BIOCARTA_FCER1_PATHWAY	BIOCARTA_FCER1_PATHWAY	1	1	320	39	0
BIOCARTA_FEEDER_PATHWAY	BIOCARTA_FEEDER_PATHWAY	1	1	320	9	0
BIOCARTA_FIBRINOLYSIS_PATHWAY	BIOCARTA_FIBRINOLYSIS_PATHWAY	1	1	320	12	0
BIOCARTA_G1_PATHWAY	BIOCARTA_G1_PATHWAY	1	1	320	28	0
BIOCARTA_G2_PATHWAY	BIOCARTA_G2_PATHWAY	1	1	320	24	0
BIOCARTA_GABA_PATHWAY	BIOCARTA_GABA_PATHWAY	1	1	320	10	0
BIOCARTA_GCR_PATHWAY	BIOCARTA_GCR_PATHWAY	1	1	320	20	0
BIOCARTA_GH_PATHWAY	BIOCARTA_GH_PATHWAY	1	1	320	28	0
BIOCARTA_GLEEVEC_PATHWAY	BIOCARTA_GLEEVEC_PATHWAY	1	1	320	23	0
BIOCARTA_GLYCOLYSIS_PATHWAY	BIOCARTA_GLYCOLYSIS_PATHWAY	1	1	320	10	0
BIOCARTA_GRANULOCYTES_PATHWAY	BIOCARTA_GRANULOCYTES_PATHWAY	1	1	320	13	0
BIOCARTA_GSK3_PATHWAY	BIOCARTA_GSK3_PATHWAY	1	1	320	27	0
BIOCARTA_HCMV_PATHWAY	BIOCARTA_HCMV_PATHWAY	1	1	320	17	0
BIOCARTA_HDAC_PATHWAY	BIOCARTA_HDAC_PATHWAY	1	1	320	29	0
BIOCARTA_HER2_PATHWAY	BIOCARTA_HER2_PATHWAY	1	1	320	22	0
BIOCARTA_HIF_PATHWAY	BIOCARTA_HIF_PATHWAY	1	1	320	15	0
BIOCARTA_IGF1_PATHWAY	BIOCARTA_IGF1_PATHWAY	1	1	320	21	0
BIOCARTA_IL12_PATHWAY	BIOCARTA_IL12_PATHWAY	1	1	320	21	0
BIOCARTA_IL17_PATHWAY	BIOCARTA_IL17_PATHWAY	1	1	320	14	0
BIOCARTA_IL22BP_PATHWAY	BIOCARTA_IL22BP_PATHWAY	1	1	320	16	0
BIOCARTA_IL2_PATHWAY	BIOCARTA_IL2_PATHWAY	1	1	320	22	0
BIOCARTA_IL3_PATHWAY	BIOCARTA_IL3_PATHWAY	1	1	320	15	0
BIOCARTA_IL4_PATHWAY	BIOCARTA_IL4_PATHWAY	1	1	320	11	0
BIOCARTA_IL5_PATHWAY	BIOCARTA_IL5_PATHWAY	1	1	320	10	0
BIOCARTA_IL6_PATHWAY	BIOCARTA_IL6_PATHWAY	1	1	320	22	0
BIOCARTA_INFLAM_PATHWAY	BIOCARTA_INFLAM_PATHWAY	1	1	320	28	0
BIOCARTA_INSULIN_PATHWAY	BIOCARTA_INSULIN_PATHWAY	1	1	320	22	0
BIOCARTA_INTEGRIN_PATHWAY	BIOCARTA_INTEGRIN_PATHWAY	1	1	320	38	0
BIOCARTA_INTRINSIC_PATHWAY	BIOCARTA_INTRINSIC_PATHWAY	1	1	320	23	0
BIOCARTA_KREB_PATHWAY	BIOCARTA_KREB_PATHWAY	1	1	320	8	0
BIOCARTA_LAIR_PATHWAY	BIOCARTA_LAIR_PATHWAY	1	1	320	16	0
BIOCARTA_LECTIN_PATHWAY	BIOCARTA_LECTIN_PATHWAY	1	1	320	12	0
BIOCARTA_LEPTIN_PATHWAY	BIOCARTA_LEPTIN_PATHWAY	1	1	320	11	0
BIOCARTA_LONGEVITY_PATHWAY	BIOCARTA_LONGEVITY_PATHWAY	1	1	320	15	0
BIOCARTA_LYM_PATHWAY	BIOCARTA_LYM_PATHWAY	1	1	320	10	0
BIOCARTA_MAL_PATHWAY	BIOCARTA_MAL_PATHWAY	1	1	320	19	0
BIOCARTA_MAPK_PATHWAY	BIOCARTA_MAPK_PATHWAY	1	1	320	86	0
BIOCARTA_MCM_PATHWAY	BIOCARTA_MCM_PATHWAY	1	1	320	18	0
BIOCARTA_MEF2D_PATHWAY	BIOCARTA_MEF2D_PATHWAY	1	1	320	19	0
BIOCARTA_MET_PATHWAY	BIOCARTA_MET_PATHWAY	1	1	320	37	0
BIOCARTA_MONOCYTE_PATHWAY	BIOCARTA_MONOCYTE_PATHWAY	1	1	320	11	0
BIOCARTA_MTA3_PATHWAY	BIOCARTA_MTA3_PATHWAY	1	1	320	19	0
BIOCARTA_MYOSIN_PATHWAY	BIOCARTA_MYOSIN_PATHWAY	1	1	320	31	0
BIOCARTA_NDKDYNAMIN_PATHWAY	BIOCARTA_NDKDYNAMIN_PATHWAY	1	1	320	19	0
BIOCARTA_NEUROTRANSMITTERS_PATHWAY	BIOCARTA_NEUROTRANSMITTERS_PATHWAY	1	1	320	6	0
BIOCARTA_NGF_PATHWAY	BIOCARTA_NGF_PATHWAY	1	1	320	18	0
BIOCARTA_NKCELLS_PATHWAY	BIOCARTA_NKCELLS_PATHWAY	1	1	320	20	0
BIOCARTA_NO2IL12_PATHWAY	BIOCARTA_NO2IL12_PATHWAY	1	1	320	17	0
BIOCARTA_NTHI_PATHWAY	BIOCARTA_NTHI_PATHWAY	1	1	320	23	0
BIOCARTA_NUCLEARRS_PATHWAY	BIOCARTA_NUCLEARRS_PATHWAY	1	1	320	14	0
BIOCARTA_P27_PATHWAY	BIOCARTA_P27_PATHWAY	1	1	320	13	0
BIOCARTA_P35ALZHEIMERS_PATHWAY	BIOCARTA_P35ALZHEIMERS_PATHWAY	1	1	320	11	0
BIOCARTA_P38MAPK_PATHWAY	BIOCARTA_P38MAPK_PATHWAY	1	1	320	39	0
BIOCARTA_P53HYPOXIA_PATHWAY	BIOCARTA_P53HYPOXIA_PATHWAY	1	1	320	23	0
BIOCARTA_PAR1_PATHWAY	BIOCARTA_PAR1_PATHWAY	1	1	320	37	0
BIOCARTA_PARKIN_PATHWAY	BIOCARTA_PARKIN_PATHWAY	1	1	320	11	0
BIOCARTA_PDGF_PATHWAY	BIOCARTA_PDGF_PATHWAY	1	1	320	32	0
BIOCARTA_PGC1A_PATHWAY	BIOCARTA_PGC1A_PATHWAY	1	1	320	23	0
BIOCARTA_PITX2_PATHWAY	BIOCARTA_PITX2_PATHWAY	1	1	320	15	0
BIOCARTA_PLATELETAPP_PATHWAY	BIOCARTA_PLATELETAPP_PATHWAY	1	1	320	14	0
BIOCARTA_PML_PATHWAY	BIOCARTA_PML_PATHWAY	1	1	320	17	0
BIOCARTA_PROTEASOME_PATHWAY	BIOCARTA_PROTEASOME_PATHWAY	1	1	320	28	0
BIOCARTA_PS1_PATHWAY	BIOCARTA_PS1_PATHWAY	1	1	320	14	0
BIOCARTA_PTC1_PATHWAY	BIOCARTA_PTC1_PATHWAY	1	1	320	11	0
BIOCARTA_PTDINS_PATHWAY	BIOCARTA_PTDINS_PATHWAY	1	1	320	23	0
BIOCARTA_PTEN_PATHWAY	BIOCARTA_PTEN_PATHWAY	1	1	320	18	0
BIOCARTA_PYK2_PATHWAY	BIOCARTA_PYK2_PATHWAY	1	1	320	29	0
BIOCARTA_RAB_PATHWAY	BIOCARTA_RAB_PATHWAY	1	1	320	12	0
BIOCARTA_RAC1_PATHWAY	BIOCARTA_RAC1_PATHWAY	1	1	320	23	0
BIOCARTA_RACCYCD_PATHWAY	BIOCARTA_RACCYCD_PATHWAY	1	1	320	26	0
BIOCARTA_RANKL_PATHWAY	BIOCARTA_RANKL_PATHWAY	1	1	320	14	0
BIOCARTA_RANMS_PATHWAY	BIOCARTA_RANMS_PATHWAY	1	1	320	10	0
BIOCARTA_RARRXR_PATHWAY	BIOCARTA_RARRXR_PATHWAY	1	1	320	15	0
BIOCARTA_RAS_PATHWAY	BIOCARTA_RAS_PATHWAY	1	1	320	23	0
BIOCARTA_RB_PATHWAY	BIOCARTA_RB_PATHWAY	1	1	320	13	0
BIOCARTA_RELA_PATHWAY	BIOCARTA_RELA_PATHWAY	1	1	320	16	0
BIOCARTA_RHO_PATHWAY	BIOCARTA_RHO_PATHWAY	1	1	320	32	0
BIOCARTA_RNA_PATHWAY	BIOCARTA_RNA_PATHWAY	1	1	320	10	0
BIOCARTA_SALMONELLA_PATHWAY	BIOCARTA_SALMONELLA_PATHWAY	1	1	320	13	0
BIOCARTA_SARS_PATHWAY	BIOCARTA_SARS_PATHWAY	1	1	320	10	0
BIOCARTA_SET_PATHWAY	BIOCARTA_SET_PATHWAY	1	1	320	11	0
BIOCARTA_SKP2E2F_PATHWAY	BIOCARTA_SKP2E2F_PATHWAY	1	1	320	10	0
BIOCARTA_SPPA_PATHWAY	BIOCARTA_SPPA_PATHWAY	1	1	320	22	0
BIOCARTA_SPRY_PATHWAY	BIOCARTA_SPRY_PATHWAY	1	1	320	18	0
BIOCARTA_SRCRPTP_PATHWAY	BIOCARTA_SRCRPTP_PATHWAY	1	1	320	11	0
BIOCARTA_STEM_PATHWAY	BIOCARTA_STEM_PATHWAY	1	1	320	14	0
BIOCARTA_STRESS_PATHWAY	BIOCARTA_STRESS_PATHWAY	1	1	320	25	0
BIOCARTA_TALL1_PATHWAY	BIOCARTA_TALL1_PATHWAY	1	1	320	15	0
BIOCARTA_TCAPOPTOSIS_PATHWAY	BIOCARTA_TCAPOPTOSIS_PATHWAY	1	1	320	9	0
BIOCARTA_TCR_PATHWAY	BIOCARTA_TCR_PATHWAY	1	1	320	45	0
BIOCARTA_TCRA_PATHWAY	BIOCARTA_TCRA_PATHWAY	1	1	320	11	0
BIOCARTA_TCYTOTOXIC_PATHWAY	BIOCARTA_TCYTOTOXIC_PATHWAY	1	1	320	12	0
BIOCARTA_TFF_PATHWAY	BIOCARTA_TFF_PATHWAY	1	1	320	21	0
BIOCARTA_TGFB_PATHWAY	BIOCARTA_TGFB_PATHWAY	1	1	320	19	0
BIOCARTA_TH1TH2_PATHWAY	BIOCARTA_TH1TH2_PATHWAY	1	1	320	19	0
BIOCARTA_THELPER_PATHWAY	BIOCARTA_THELPER_PATHWAY	1	1	320	12	0
BIOCARTA_TID_PATHWAY	BIOCARTA_TID_PATHWAY	1	1	320	19	0
BIOCARTA_TNFR2_PATHWAY	BIOCARTA_TNFR2_PATHWAY	1	1	320	17	0
BIOCARTA_TOB1_PATHWAY	BIOCARTA_TOB1_PATHWAY	1	1	320	19	0
BIOCARTA_TOLL_PATHWAY	BIOCARTA_TOLL_PATHWAY	1	1	320	37	0
BIOCARTA_TPO_PATHWAY	BIOCARTA_TPO_PATHWAY	1	1	320	24	0
BIOCARTA_TRKA_PATHWAY	BIOCARTA_TRKA_PATHWAY	1	1	320	12	0
BIOCARTA_UCALPAIN_PATHWAY	BIOCARTA_UCALPAIN_PATHWAY	1	1	320	18	0
BIOCARTA_VDR_PATHWAY	BIOCARTA_VDR_PATHWAY	1	1	320	12	0
BIOCARTA_VEGF_PATHWAY	BIOCARTA_VEGF_PATHWAY	1	1	320	29	0
BIOCARTA_VITCB_PATHWAY	BIOCARTA_VITCB_PATHWAY	1	1	320	11	0
BIOCARTA_WNT_PATHWAY	BIOCARTA_WNT_PATHWAY	1	1	320	26	0
BIOPOLYMER_BIOSYNTHETIC_PROCESS	BIOPOLYMER_BIOSYNTHETIC_PROCESS	1	1	320	14	0
BIOPOLYMER_CATABOLIC_PROCESS	BIOPOLYMER_CATABOLIC_PROCESS	1	1	320	113	0
BLOOD_COAGULATION	BLOOD_COAGULATION	1	1	320	42	0
BRUSH_BORDER	BRUSH_BORDER	1	1	320	10	0
CALCIUM_INDEPENDENT_CELL_CELL_ADHESION	CALCIUM_INDEPENDENT_CELL_CELL_ADHESION	1	1	320	22	0
CALCIUM_ION_BINDING	CALCIUM_ION_BINDING	0.448729	1	320	103	1	TGM3
CALCIUM_ION_TRANSMEMBRANE_TRANSPORTER_ACTIVITY	CALCIUM_ION_TRANSMEMBRANE_TRANSPORTER_ACTIVITY	1	1	320	11	0
CALCIUM_ION_TRANSPORT	CALCIUM_ION_TRANSPORT	1	1	320	27	0
CALCIUM_MEDIATED_SIGNALING	CALCIUM_MEDIATED_SIGNALING	1	1	320	15	0
CAMP_MEDIATED_SIGNALING	CAMP_MEDIATED_SIGNALING	0.313185	1	320	65	1	CCR2
CARBOHYDRATE_BINDING	CARBOHYDRATE_BINDING	1	1	320	70	0
CARBOHYDRATE_CATABOLIC_PROCESS	CARBOHYDRATE_CATABOLIC_PROCESS	1	1	320	24	0
CARBOHYDRATE_KINASE_ACTIVITY	CARBOHYDRATE_KINASE_ACTIVITY	1	1	320	15	0
CARBOHYDRATE_TRANSMEMBRANE_TRANSPORTER_ACTIVITY	CARBOHYDRATE_TRANSMEMBRANE_TRANSPORTER_ACTIVITY	1	1	320	16	0
CARBOHYDRATE_TRANSPORT	CARBOHYDRATE_TRANSPORT	1	1	320	19	0
CARBON_OXYGEN_LYASE_ACTIVITY	CARBON_OXYGEN_LYASE_ACTIVITY	1	1	320	31	0
CARBONATE_DEHYDRATASE_ACTIVITY	CARBONATE_DEHYDRATASE_ACTIVITY	1	1	320	13	0
CARBOXYLESTERASE_ACTIVITY	CARBOXYLESTERASE_ACTIVITY	1	1	320	33	0
CARBOXYLIC_ACID_TRANSMEMBRANE_TRANSPORTER_ACTIVITY	CARBOXYLIC_ACID_TRANSMEMBRANE_TRANSPORTER_ACTIVITY	1	1	320	44	0
CARBOXYLIC_ACID_TRANSPORT	CARBOXYLIC_ACID_TRANSPORT	1	1	320	41	0
CARBOXYPEPTIDASE_ACTIVITY	CARBOXYPEPTIDASE_ACTIVITY	1	1	320	11	0
CASPASE_ACTIVATION	CASPASE_ACTIVATION	1	1	320	26	0
CASPASE_REGULATOR_ACTIVITY	CASPASE_REGULATOR_ACTIVITY	1	1	320	14	0
CATION_TRANSPORTING_ATPASE_ACTIVITY	CATION_TRANSPORTING_ATPASE_ACTIVITY	1	1	320	11	0
CDC42_PROTEIN_SIGNAL_TRANSDUCTION	CDC42_PROTEIN_SIGNAL_TRANSDUCTION	1	1	320	12	0
CELL_ACTIVATION	CELL_ACTIVATION	1	1	320	75	0
CELL_CELL_ADHESION	CELL_CELL_ADHESION	0.381096	1	320	83	1	CNTN4
CELL_CORTEX_PART	CELL_CORTEX_PART	1	1	320	24	0
CELL_CYCLE_ARREST_GO_0007050	CELL_CYCLE_ARREST_GO_0007050	1	1	320	55	0
CELL_CYCLE_CHECKPOINT_GO_0000075	CELL_CYCLE_CHECKPOINT_GO_0000075	1	1	320	47	0
CELL_CYCLE_PHASE	CELL_CYCLE_PHASE	1	1	320	168	0
CELL_CYCLE_PROCESS	CELL_CYCLE_PROCESS	1	1	320	191	0
CELL_DIVISION	CELL_DIVISION	1	1	320	21	0
CELL_FATE_COMMITMENT	CELL_FATE_COMMITMENT	1	1	320	13	0
CELL_JUNCTION	CELL_JUNCTION	1	1	320	79	0
CELL_MATRIX_ADHESION	CELL_MATRIX_ADHESION	1	1	320	37	0
CELL_MATRIX_JUNCTION	CELL_MATRIX_JUNCTION	1	1	320	17	0
CELL_MATURATION	CELL_MATURATION	1	1	320	16	0
CELL_PROJECTION_BIOGENESIS	CELL_PROJECTION_BIOGENESIS	1	1	320	25	0
CELL_SOMA	CELL_SOMA	1	1	320	10	0
CELL_STRUCTURE_DISASSEMBLY_DURING_APOPTOSIS	CELL_STRUCTURE_DISASSEMBLY_DURING_APOPTOSIS	1	1	320	18	0
CELL_SUBSTRATE_ADHERENS_JUNCTION	CELL_SUBSTRATE_ADHERENS_JUNCTION	1	1	320	16	0
CELL_SUBSTRATE_ADHESION	CELL_SUBSTRATE_ADHESION	1	1	320	38	0
CELL_SURFACE	CELL_SURFACE	1	1	320	75	0
CELLULAR_CARBOHYDRATE_CATABOLIC_PROCESS	CELLULAR_CARBOHYDRATE_CATABOLIC_PROCESS	1	1	320	23	0
CELLULAR_COMPONENT_DISASSEMBLY	CELLULAR_COMPONENT_DISASSEMBLY	1	1	320	31	0
CELLULAR_LIPID_CATABOLIC_PROCESS	CELLULAR_LIPID_CATABOLIC_PROCESS	1	1	320	35	0
CELLULAR_MACROMOLECULE_CATABOLIC_PROCESS	CELLULAR_MACROMOLECULE_CATABOLIC_PROCESS	1	1	320	100	0
CELLULAR_POLYSACCHARIDE_METABOLIC_PROCESS	CELLULAR_POLYSACCHARIDE_METABOLIC_PROCESS	1	1	320	16	0
CELLULAR_PROTEIN_CATABOLIC_PROCESS	CELLULAR_PROTEIN_CATABOLIC_PROCESS	1	1	320	54	0
CELLULAR_PROTEIN_COMPLEX_ASSEMBLY	CELLULAR_PROTEIN_COMPLEX_ASSEMBLY	1	1	320	32	0
CELLULAR_PROTEIN_COMPLEX_DISASSEMBLY	CELLULAR_PROTEIN_COMPLEX_DISASSEMBLY	1	1	320	11	0
CELLULAR_RESPIRATION	CELLULAR_RESPIRATION	1	1	320	19	0
CELLULAR_RESPONSE_TO_EXTRACELLULAR_STIMULUS	CELLULAR_RESPONSE_TO_EXTRACELLULAR_STIMULUS	1	1	320	12	0
CELLULAR_RESPONSE_TO_NUTRIENT_LEVELS	CELLULAR_RESPONSE_TO_NUTRIENT_LEVELS	1	1	320	10	0
CELLULAR_RESPONSE_TO_STIMULUS	CELLULAR_RESPONSE_TO_STIMULUS	1	1	320	19	0
CELLULAR_RESPONSE_TO_STRESS	CELLULAR_RESPONSE_TO_STRESS	1	1	320	10	0
CENTROSOME	CENTROSOME	1	1	320	56	0
CENTROSOME_CYCLE	CENTROSOME_CYCLE	1	1	320	11	0
CENTROSOME_ORGANIZATION_AND_BIOGENESIS	CENTROSOME_ORGANIZATION_AND_BIOGENESIS	1	1	320	15	0
CERAMIDE_METABOLIC_PROCESS	CERAMIDE_METABOLIC_PROCESS	1	1	320	11	0
CHANNEL_REGULATOR_ACTIVITY	CHANNEL_REGULATOR_ACTIVITY	1	1	320	23	0
CHAPERONE_BINDING	CHAPERONE_BINDING	1	1	320	11	0
CHEMOKINE_ACTIVITY	CHEMOKINE_ACTIVITY	1	1	320	41	0
CHROMATIN	CHROMATIN	1	1	320	35	0
CHROMATIN_BINDING	CHROMATIN_BINDING	1	1	320	32	0
CHROMOSOMAL_PART	CHROMOSOMAL_PART	1	1	320	94	0
CHROMOSOME	CHROMOSOME	1	1	320	120	0
CHROMOSOME_CONDENSATION	CHROMOSOME_CONDENSATION	1	1	320	10	0
CHROMOSOME_ORGANIZATION_AND_BIOGENESIS	CHROMOSOME_ORGANIZATION_AND_BIOGENESIS	0.503273	1	320	121	1	RSF1
CHROMOSOME_SEGREGATION	CHROMOSOME_SEGREGATION	1	1	320	32	0
CHROMOSOMEPERICENTRIC_REGION	CHROMOSOMEPERICENTRIC_REGION	1	1	320	30	0
COAGULATION	COAGULATION	1	1	320	43	0
COATED_MEMBRANE	COATED_MEMBRANE	1	1	320	16	0
COATED_VESICLE_MEMBRANE	COATED_VESICLE_MEMBRANE	1	1	320	16	0
COENZYME_BINDING	COENZYME_BINDING	1	1	320	16	0
COFACTOR_BINDING	COFACTOR_BINDING	1	1	320	22	0
COFACTOR_CATABOLIC_PROCESS	COFACTOR_CATABOLIC_PROCESS	1	1	320	10	0
COLLAGEN	COLLAGEN	1	1	320	23	0
COLLAGEN_BINDING	COLLAGEN_BINDING	1	1	320	13	0
CONDENSED_CHROMOSOME	CONDENSED_CHROMOSOME	1	1	320	32	0
CONDENSED_NUCLEAR_CHROMOSOME	CONDENSED_NUCLEAR_CHROMOSOME	1	1	320	16	0
CONTRACTILE_FIBER	CONTRACTILE_FIBER	1	1	320	25	0
CONTRACTILE_FIBER_PART	CONTRACTILE_FIBER_PART	1	1	320	23	0
COPPER_ION_BINDING	COPPER_ION_BINDING	1	1	320	15	0
CORNIFIED_ENVELOPE	CORNIFIED_ENVELOPE	1	1	320	13	0
CORTICAL_ACTIN_CYTOSKELETON	CORTICAL_ACTIN_CYTOSKELETON	1	1	320	13	0
CORTICAL_CYTOSKELETON	CORTICAL_CYTOSKELETON	1	1	320	20	0
COVALENT_CHROMATIN_MODIFICATION	COVALENT_CHROMATIN_MODIFICATION	1	1	320	24	0
CYCLASE_ACTIVITY	CYCLASE_ACTIVITY	1	1	320	8	0
CYCLIC_NUCLEOTIDE_METABOLIC_PROCESS	CYCLIC_NUCLEOTIDE_METABOLIC_PROCESS	1	1	320	11	0
CYSTEINE_TYPE_ENDOPEPTIDASE_ACTIVITY	CYSTEINE_TYPE_ENDOPEPTIDASE_ACTIVITY	1	1	320	37	0
CYSTEINE_TYPE_PEPTIDASE_ACTIVITY	CYSTEINE_TYPE_PEPTIDASE_ACTIVITY	1	1	320	50	0
CYTOCHROME_C_OXIDASE_ACTIVITY	CYTOCHROME_C_OXIDASE_ACTIVITY	1	1	320	13	0
CYTOKINE_ACTIVITY	CYTOKINE_ACTIVITY	0.464452	1	320	108	1	IL1RN
CYTOKINE_BIOSYNTHETIC_PROCESS	CYTOKINE_BIOSYNTHETIC_PROCESS	1	1	320	41	0
CYTOKINE_METABOLIC_PROCESS	CYTOKINE_METABOLIC_PROCESS	1	1	320	42	0
CYTOKINE_PRODUCTION	CYTOKINE_PRODUCTION	1	1	320	73	0
CYTOKINE_SECRETION	CYTOKINE_SECRETION	1	1	320	18	0
CYTOKINESIS	CYTOKINESIS	1	1	320	19	0
CYTOPLASM_ORGANIZATION_AND_BIOGENESIS	CYTOPLASM_ORGANIZATION_AND_BIOGENESIS	1	1	320	15	0
CYTOPLASMIC_VESICLE_MEMBRANE	CYTOPLASMIC_VESICLE_MEMBRANE	1	1	320	27	0
CYTOPLASMIC_VESICLE_PART	CYTOPLASMIC_VESICLE_PART	1	1	320	27	0
CYTOSKELETON_DEPENDENT_INTRACELLULAR_TRANSPORT	CYTOSKELETON_DEPENDENT_INTRACELLULAR_TRANSPORT	1	1	320	26	0
CYTOSOLIC_PART	CYTOSOLIC_PART	1	1	320	21	0
DAMAGED_DNA_BINDING	DAMAGED_DNA_BINDING	1	1	320	21	0
DEACETYLASE_ACTIVITY	DEACETYLASE_ACTIVITY	1	1	320	11	0
DEAMINASE_ACTIVITY	DEAMINASE_ACTIVITY	1	1	320	14	0
DELAYED_RECTIFIER_POTASSIUM_CHANNEL_ACTIVITY	DELAYED_RECTIFIER_POTASSIUM_CHANNEL_ACTIVITY	1	1	320	12	0
DEOXYRIBONUCLEASE_ACTIVITY	DEOXYRIBONUCLEASE_ACTIVITY	1	1	320	21	0
DETECTION_OF_ABIOTIC_STIMULUS	DETECTION_OF_ABIOTIC_STIMULUS	1	1	320	19	0
DETECTION_OF_BIOTIC_STIMULUS	DETECTION_OF_BIOTIC_STIMULUS	1	1	320	10	0
DETECTION_OF_CHEMICAL_STIMULUS	DETECTION_OF_CHEMICAL_STIMULUS	1	1	320	18	0
DETECTION_OF_EXTERNAL_STIMULUS	DETECTION_OF_EXTERNAL_STIMULUS	1	1	320	23	0
DETECTION_OF_STIMULUS	DETECTION_OF_STIMULUS	1	1	320	47	0
DETECTION_OF_STIMULUS_INVOLVED_IN_SENSORY_PERCEPTION	DETECTION_OF_STIMULUS_INVOLVED_IN_SENSORY_PERCEPTION	1	1	320	21	0
DEVELOPMENTAL_GROWTH	DEVELOPMENTAL_GROWTH	1	1	320	11	0
DEVELOPMENTAL_MATURATION	DEVELOPMENTAL_MATURATION	1	1	320	18	0
DI___TRI_VALENT_INORGANIC_CATION_TRANSMEMBRANE_TRANSPORTER_ACTIVITY	DI___TRI_VALENT_INORGANIC_CATION_TRANSMEMBRANE_TRANSPORTER_ACTIVITY	1	1	320	22	0
DI___TRI_VALENT_INORGANIC_CATION_TRANSPORT	DI___TRI_VALENT_INORGANIC_CATION_TRANSPORT	1	1	320	32	0
DNA_CATABOLIC_PROCESS	DNA_CATABOLIC_PROCESS	1	1	320	23	0
DNA_DAMAGE_CHECKPOINT	DNA_DAMAGE_CHECKPOINT	1	1	320	19	0
DNA_DAMAGE_RESPONSESIGNAL_TRANSDUCTION_BY_P53_CLASS_MEDIATOR	DNA_DAMAGE_RESPONSESIGNAL_TRANSDUCTION_BY_P53_CLASS_MEDIATOR	1	1	320	12	0
DNA_DEPENDENT_ATPASE_ACTIVITY	DNA_DEPENDENT_ATPASE_ACTIVITY	1	1	320	22	0
DNA_DEPENDENT_DNA_REPLICATION	DNA_DEPENDENT_DNA_REPLICATION	1	1	320	56	0
DNA_DIRECTED_DNA_POLYMERASE_ACTIVITY	DNA_DIRECTED_DNA_POLYMERASE_ACTIVITY	1	1	320	14	0
DNA_DIRECTED_RNA_POLYMERASE_COMPLEX	DNA_DIRECTED_RNA_POLYMERASE_COMPLEX	1	1	320	17	0
DNA_DIRECTED_RNA_POLYMERASEII_CORE_COMPLEX	DNA_DIRECTED_RNA_POLYMERASEII_CORE_COMPLEX	1	1	320	12	0
DNA_DIRECTED_RNA_POLYMERASEII_HOLOENZYME	DNA_DIRECTED_RNA_POLYMERASEII_HOLOENZYME	1	1	320	63	0
DNA_FRAGMENTATION_DURING_APOPTOSIS	DNA_FRAGMENTATION_DURING_APOPTOSIS	1	1	320	13	0
DNA_HELICASE_ACTIVITY	DNA_HELICASE_ACTIVITY	1	1	320	25	0
DNA_INTEGRITY_CHECKPOINT	DNA_INTEGRITY_CHECKPOINT	1	1	320	23	0
DNA_MODIFICATION	DNA_MODIFICATION	1	1	320	11	0
DNA_POLYMERASE_ACTIVITY	DNA_POLYMERASE_ACTIVITY	1	1	320	18	0
DNA_RECOMBINATION	DNA_RECOMBINATION	1	1	320	46	0
DNA_REPAIR	DNA_REPAIR	1	1	320	123	0
DNA_REPLICATION	DNA_REPLICATION	1	1	320	101	0
DNA_REPLICATION_INITIATION	DNA_REPLICATION_INITIATION	1	1	320	16	0
DOUBLE_STRAND_BREAK_REPAIR	DOUBLE_STRAND_BREAK_REPAIR	1	1	320	21	0
DOUBLE_STRANDED_DNA_BINDING	DOUBLE_STRANDED_DNA_BINDING	1	1	320	28	0
DOUBLE_STRANDED_RNA_BINDING	DOUBLE_STRANDED_RNA_BINDING	1	1	320	17	0
DRUG_BINDING	DRUG_BINDING	1	1	320	16	0
ECTODERM_DEVELOPMENT	ECTODERM_DEVELOPMENT	0.370261	1	320	80	1	TGM3
ELECTRON_TRANSPORT_GO_0006118	ELECTRON_TRANSPORT_GO_0006118	1	1	320	51	0
EMBRYO_IMPLANTATION	EMBRYO_IMPLANTATION	1	1	320	14	0
ENDOCYTIC_VESICLE	ENDOCYTIC_VESICLE	1	1	320	14	0
ENDODEOXYRIBONUCLEASE_ACTIVITY	ENDODEOXYRIBONUCLEASE_ACTIVITY	1	1	320	10	0
ENDONUCLEASE_ACTIVITY	ENDONUCLEASE_ACTIVITY	1	1	320	24	0
ENDONUCLEASE_ACTIVITY_GO_0016893	ENDONUCLEASE_ACTIVITY_GO_0016893	1	1	320	11	0
ENDOPEPTIDASE_ACTIVITY	ENDOPEPTIDASE_ACTIVITY	1	1	320	114	0
ENDOPLASMIC_RETICULUM_LUMEN	ENDOPLASMIC_RETICULUM_LUMEN	1	1	320	13	0
ENDOPLASMIC_RETICULUM_MEMBRANE	ENDOPLASMIC_RETICULUM_MEMBRANE	0.381096	1	320	83	1	RTN1
ENDOPLASMIC_RETICULUM_PART	ENDOPLASMIC_RETICULUM_PART	0.419257	1	320	94	1	RTN1
ENDORIBONUCLEASE_ACTIVITY	ENDORIBONUCLEASE_ACTIVITY	1	1	320	13	0
ENDOSOME	ENDOSOME	0.317145	1	320	66	1	DNER
ENDOSOME_TRANSPORT	ENDOSOME_TRANSPORT	1	1	320	23	0
ENDOTHELIAL_CELL_MIGRATION	ENDOTHELIAL_CELL_MIGRATION	1	1	320	11	0
ENDOTHELIAL_CELL_PROLIFERATION	ENDOTHELIAL_CELL_PROLIFERATION	1	1	320	11	0
ENERGY_DERIVATION_BY_OXIDATION_OF_ORGANIC_COMPOUNDS	ENERGY_DERIVATION_BY_OXIDATION_OF_ORGANIC_COMPOUNDS	1	1	320	37	0
ENERGY_RESERVE_METABOLIC_PROCESS	ENERGY_RESERVE_METABOLIC_PROCESS	1	1	320	15	0
ENZYME_ACTIVATOR_ACTIVITY	ENZYME_ACTIVATOR_ACTIVITY	1	1	320	123	0
EPIDERMIS_DEVELOPMENT	EPIDERMIS_DEVELOPMENT	0.336609	1	320	71	1	TGM3
EPITHELIAL_CELL_DIFFERENTIATION	EPITHELIAL_CELL_DIFFERENTIATION	1	1	320	10	0
EPITHELIAL_TO_MESENCHYMAL_TRANSITION	EPITHELIAL_TO_MESENCHYMAL_TRANSITION	1	1	320	10	0
ER_GOLGI_INTERMEDIATE_COMPARTMENT	ER_GOLGI_INTERMEDIATE_COMPARTMENT	1	1	320	24	0
ER_NUCLEAR_SIGNALING_PATHWAY	ER_NUCLEAR_SIGNALING_PATHWAY	1	1	320	14	0
ER_TO_GOLGI_VESICLE_MEDIATED_TRANSPORT	ER_TO_GOLGI_VESICLE_MEDIATED_TRANSPORT	1	1	320	18	0
ESTABLISHMENT_AND_OR_MAINTENANCE_OF_CELL_POLARITY	ESTABLISHMENT_AND_OR_MAINTENANCE_OF_CELL_POLARITY	1	1	320	19	0
ESTABLISHMENT_AND_OR_MAINTENANCE_OF_CHROMATIN_ARCHITECTURE	ESTABLISHMENT_AND_OR_MAINTENANCE_OF_CHROMATIN_ARCHITECTURE	0.35552	1	320	76	1	RSF1
ESTABLISHMENT_OF_ORGANELLE_LOCALIZATION	ESTABLISHMENT_OF_ORGANELLE_LOCALIZATION	1	1	320	18	0
ESTABLISHMENT_OF_PROTEIN_LOCALIZATION	ESTABLISHMENT_OF_PROTEIN_LOCALIZATION	0.661091	1	320	187	1	REEP1
ESTABLISHMENT_OF_VESICLE_LOCALIZATION	ESTABLISHMENT_OF_VESICLE_LOCALIZATION	1	1	320	10	0
EUKARYOTIC_TRANSLATION_INITIATION_FACTOR_3_COMPLEX	EUKARYOTIC_TRANSLATION_INITIATION_FACTOR_3_COMPLEX	1	1	320	10	0
EXONUCLEASE_ACTIVITY	EXONUCLEASE_ACTIVITY	1	1	320	18	0
EXOPEPTIDASE_ACTIVITY	EXOPEPTIDASE_ACTIVITY	1	1	320	31	0
EXTERNAL_SIDE_OF_PLASMA_MEMBRANE	EXTERNAL_SIDE_OF_PLASMA_MEMBRANE	1	1	320	16	0
EXTRACELLULAR_MATRIX_STRUCTURAL_CONSTITUENT	EXTRACELLULAR_MATRIX_STRUCTURAL_CONSTITUENT	1	1	320	26	0
EXTRACELLULAR_STRUCTURE_ORGANIZATION_AND_BIOGENESIS	EXTRACELLULAR_STRUCTURE_ORGANIZATION_AND_BIOGENESIS	1	1	320	31	0
FATTY_ACID_BETA_OXIDATION	FATTY_ACID_BETA_OXIDATION	1	1	320	11	0
FATTY_ACID_BIOSYNTHETIC_PROCESS	FATTY_ACID_BIOSYNTHETIC_PROCESS	1	1	320	14	0
FATTY_ACID_METABOLIC_PROCESS	FATTY_ACID_METABOLIC_PROCESS	0.305195	1	320	63	1	CYP4F3
FATTY_ACID_OXIDATION	FATTY_ACID_OXIDATION	1	1	320	18	0
FEEDING_BEHAVIOR	FEEDING_BEHAVIOR	1	1	320	23	0
FEMALE_GAMETE_GENERATION	FEMALE_GAMETE_GENERATION	1	1	320	16	0
FEMALE_PREGNANCY	FEMALE_PREGNANCY	1	1	320	53	0
FOCAL_ADHESION	FOCAL_ADHESION	1	1	320	13	0
FOCAL_ADHESION_FORMATION	FOCAL_ADHESION_FORMATION	1	1	320	10	0
FUCOSYLTRANSFERASE_ACTIVITY	FUCOSYLTRANSFERASE_ACTIVITY	1	1	320	10	0
G1_PHASE	G1_PHASE	1	1	320	15	0
G1_PHASE_OF_MITOTIC_CELL_CYCLE	G1_PHASE_OF_MITOTIC_CELL_CYCLE	1	1	320	13	0
G1_S_TRANSITION_OF_MITOTIC_CELL_CYCLE	G1_S_TRANSITION_OF_MITOTIC_CELL_CYCLE	1	1	320	27	0
G2_M_TRANSITION_OF_MITOTIC_CELL_CYCLE	G2_M_TRANSITION_OF_MITOTIC_CELL_CYCLE	1	1	320	13	0
G_PROTEIN_SIGNALING_ADENYLATE_CYCLASE_ACTIVATING_PATHWAY	G_PROTEIN_SIGNALING_ADENYLATE_CYCLASE_ACTIVATING_PATHWAY	1	1	320	25	0
G_PROTEIN_SIGNALING_ADENYLATE_CYCLASE_INHIBITING_PATHWAY	G_PROTEIN_SIGNALING_ADENYLATE_CYCLASE_INHIBITING_PATHWAY	1	1	320	10	0
G_PROTEIN_SIGNALING_COUPLED_TO_CAMP_NUCLEOTIDE_SECOND_MESSENGER	G_PROTEIN_SIGNALING_COUPLED_TO_CAMP_NUCLEOTIDE_SECOND_MESSENGER	0.309201	1	320	64	1	CCR2
G_PROTEIN_SIGNALING_COUPLED_TO_IP3_SECOND_MESSENGERPHOSPHOLIPASE_C_ACTIVATING	G_PROTEIN_SIGNALING_COUPLED_TO_IP3_SECOND_MESSENGERPHOSPHOLIPASE_C_ACTIVATING	1	1	320	44	0
GALACTOSYLTRANSFERASE_ACTIVITY	GALACTOSYLTRANSFERASE_ACTIVITY	1	1	320	16	0
GENE_SILENCING	GENE_SILENCING	1	1	320	10	0
GENERAL_RNA_POLYMERASE_II_TRANSCRIPTION_FACTOR_ACTIVITY	GENERAL_RNA_POLYMERASE_II_TRANSCRIPTION_FACTOR_ACTIVITY	1	1	320	32	0
GENERATION_OF_PRECURSOR_METABOLITES_AND_ENERGY	GENERATION_OF_PRECURSOR_METABOLITES_AND_ENERGY	1	1	320	121	0
GLIOGENESIS	GLIOGENESIS	1	1	320	11	0
GLUCAN_METABOLIC_PROCESS	GLUCAN_METABOLIC_PROCESS	1	1	320	10	0
GLUCOSAMINE_METABOLIC_PROCESS	GLUCOSAMINE_METABOLIC_PROCESS	1	1	320	12	0
GLUCOSE_CATABOLIC_PROCESS	GLUCOSE_CATABOLIC_PROCESS	1	1	320	11	0
GLUCOSE_METABOLIC_PROCESS	GLUCOSE_METABOLIC_PROCESS	1	1	320	27	0
GLUTAMATE_RECEPTOR_ACTIVITY	GLUTAMATE_RECEPTOR_ACTIVITY	1	1	320	20	0
GLYCEROPHOSPHOLIPID_BIOSYNTHETIC_PROCESS	GLYCEROPHOSPHOLIPID_BIOSYNTHETIC_PROCESS	1	1	320	30	0
GLYCEROPHOSPHOLIPID_METABOLIC_PROCESS	GLYCEROPHOSPHOLIPID_METABOLIC_PROCESS	1	1	320	46	0
GLYCOLIPID_METABOLIC_PROCESS	GLYCOLIPID_METABOLIC_PROCESS	1	1	320	15	0
GLYCOPROTEIN_CATABOLIC_PROCESS	GLYCOPROTEIN_CATABOLIC_PROCESS	1	1	320	12	0
GLYCOSAMINOGLYCAN_BINDING	GLYCOSAMINOGLYCAN_BINDING	1	1	320	33	0
GLYCOSPHINGOLIPID_METABOLIC_PROCESS	GLYCOSPHINGOLIPID_METABOLIC_PROCESS	1	1	320	11	0
GOLGI_APPARATUS_PART	GOLGI_APPARATUS_PART	1	1	320	97	0
GOLGI_ASSOCIATED_VESICLE	GOLGI_ASSOCIATED_VESICLE	1	1	320	27	0
GOLGI_MEMBRANE	GOLGI_MEMBRANE	1	1	320	44	0
GOLGI_STACK	GOLGI_STACK	1	1	320	13	0
GOLGI_VESICLE_TRANSPORT	GOLGI_VESICLE_TRANSPORT	1	1	320	48	0
GROWTH	GROWTH	1	1	320	77	0
GROWTH_CONE	GROWTH_CONE	1	1	320	10	0
GTPASE_ACTIVATOR_ACTIVITY	GTPASE_ACTIVATOR_ACTIVITY	1	1	320	59	0
GTPASE_ACTIVITY	GTPASE_ACTIVITY	0.432545	1	320	98	1	TGM3
GTPASE_BINDING	GTPASE_BINDING	1	1	320	34	0
HEART_DEVELOPMENT	HEART_DEVELOPMENT	1	1	320	37	0
HELICASE_ACTIVITY	HELICASE_ACTIVITY	1	1	320	51	0
HEMATOPOIETIN_INTERFERON_CLASSD200_DOMAIN_CYTOKINE_RECEPTOR_BINDING	HEMATOPOIETIN_INTERFERON_CLASSD200_DOMAIN_CYTOKINE_RECEPTOR_BINDING	1	1	320	29	0
HEME_BIOSYNTHETIC_PROCESS	HEME_BIOSYNTHETIC_PROCESS	1	1	320	10	0
HEME_METABOLIC_PROCESS	HEME_METABOLIC_PROCESS	1	1	320	11	0
HEMOPOIESIS	HEMOPOIESIS	1	1	320	73	0
HEMOPOIETIC_OR_LYMPHOID_ORGAN_DEVELOPMENT	HEMOPOIETIC_OR_LYMPHOID_ORGAN_DEVELOPMENT	1	1	320	75	0
HEMOSTASIS	HEMOSTASIS	1	1	320	47	0
HEPARIN_BINDING	HEPARIN_BINDING	1	1	320	22	0
HETEROCYCLE_METABOLIC_PROCESS	HETEROCYCLE_METABOLIC_PROCESS	1	1	320	27	0
HETEROGENEOUS_NUCLEAR_RIBONUCLEOPROTEIN_COMPLEX	HETEROGENEOUS_NUCLEAR_RIBONUCLEOPROTEIN_COMPLEX	1	1	320	13	0
HETEROPHILIC_CELL_ADHESION	HETEROPHILIC_CELL_ADHESION	1	1	320	9	0
HISTONE_ACETYLTRANSFERASE_ACTIVITY	HISTONE_ACETYLTRANSFERASE_ACTIVITY	1	1	320	16	0
HISTONE_DEACETYLASE_BINDING	HISTONE_DEACETYLASE_BINDING	1	1	320	10	0
HISTONE_DEACETYLASE_COMPLEX	HISTONE_DEACETYLASE_COMPLEX	1	1	320	20	0
HISTONE_METHYLTRANSFERASE_ACTIVITY	HISTONE_METHYLTRANSFERASE_ACTIVITY	1	1	320	10	0
HISTONE_MODIFICATION	HISTONE_MODIFICATION	1	1	320	23	0
HOMEOSTASIS_OF_NUMBER_OF_CELLS	HOMEOSTASIS_OF_NUMBER_OF_CELLS	1	1	320	20	0
HOMOPHILIC_CELL_ADHESION	HOMOPHILIC_CELL_ADHESION	1	1	320	13	0
HORMONE_ACTIVITY	HORMONE_ACTIVITY	1	1	320	43	0
HORMONE_BINDING	HORMONE_BINDING	1	1	320	12	0
HORMONE_RECEPTOR_BINDING	HORMONE_RECEPTOR_BINDING	1	1	320	29	0
HYDRO_LYASE_ACTIVITY	HYDRO_LYASE_ACTIVITY	1	1	320	27	0
HYDROGEN_ION_TRANSMEMBRANE_TRANSPORTER_ACTIVITY	HYDROGEN_ION_TRANSMEMBRANE_TRANSPORTER_ACTIVITY	1	1	320	27	0
HYDROLASE_ACTIVITY_ACTING_ON_ACID_ANHYDRIDESCATALYZING_TRANSMEMBRANE_MOVEMENT_OF_SUBSTANCES	HYDROLASE_ACTIVITY_ACTING_ON_ACID_ANHYDRIDESCATALYZING_TRANSMEMBRANE_MOVEMENT_OF_SUBSTANCES	1	1	320	39	0
HYDROLASE_ACTIVITY_ACTING_ON_CARBON_NITROGEN_NOT_PEPTIDEBONDSIN_CYCLIC_AMIDINES	HYDROLASE_ACTIVITY_ACTING_ON_CARBON_NITROGEN_NOT_PEPTIDEBONDSIN_CYCLIC_AMIDINES	1	1	320	16	0
HYDROLASE_ACTIVITY_ACTING_ON_CARBON_NITROGEN_NOT_PEPTIDEBONDSIN_LINEAR_AMIDES	HYDROLASE_ACTIVITY_ACTING_ON_CARBON_NITROGEN_NOT_PEPTIDEBONDSIN_LINEAR_AMIDES	1	1	320	21	0
HYDROLASE_ACTIVITY_ACTING_ON_GLYCOSYL_BONDS	HYDROLASE_ACTIVITY_ACTING_ON_GLYCOSYL_BONDS	1	1	320	47	0
HYDROLASE_ACTIVITY_HYDROLYZING_N_GLYCOSYL_COMPOUNDS	HYDROLASE_ACTIVITY_HYDROLYZING_N_GLYCOSYL_COMPOUNDS	1	1	320	10	0
HYDROLASE_ACTIVITY_HYDROLYZING_O_GLYCOSYL_COMPOUNDS	HYDROLASE_ACTIVITY_HYDROLYZING_O_GLYCOSYL_COMPOUNDS	1	1	320	37	0
IMMUNE_SYSTEM_DEVELOPMENT	IMMUNE_SYSTEM_DEVELOPMENT	1	1	320	79	0
IMMUNOLOGICAL_SYNAPSE	IMMUNOLOGICAL_SYNAPSE	1	1	320	11	0
INACTIVATION_OF_MAPK_ACTIVITY	INACTIVATION_OF_MAPK_ACTIVITY	1	1	320	14	0
INDUCTION_OF_APOPTOSIS_BY_EXTRACELLULAR_SIGNALS	INDUCTION_OF_APOPTOSIS_BY_EXTRACELLULAR_SIGNALS	1	1	320	27	0
INFLAMMATORY_RESPONSE	INFLAMMATORY_RESPONSE	0.517446	1	320	126	1	CCR2
INNATE_IMMUNE_RESPONSE	INNATE_IMMUNE_RESPONSE	1	1	320	23	0
INORGANIC_ANION_TRANSPORT	INORGANIC_ANION_TRANSPORT	1	1	320	18	0
INOSITOL_OR_PHOSPHATIDYLINOSITOL_KINASE_ACTIVITY	INOSITOL_OR_PHOSPHATIDYLINOSITOL_KINASE_ACTIVITY	1	1	320	18	0
INOSITOL_OR_PHOSPHATIDYLINOSITOL_PHOSPHATASE_ACTIVITY	INOSITOL_OR_PHOSPHATIDYLINOSITOL_PHOSPHATASE_ACTIVITY	1	1	320	12	0
INOSITOL_OR_PHOSPHATIDYLINOSITOL_PHOSPHODIESTERASE_ACTIVITY	INOSITOL_OR_PHOSPHATIDYLINOSITOL_PHOSPHODIESTERASE_ACTIVITY	1	1	320	13	0
INSULIN_LIKE_GROWTH_FACTOR_RECEPTOR_BINDING	INSULIN_LIKE_GROWTH_FACTOR_RECEPTOR_BINDING	1	1	320	10	0
INSULIN_RECEPTOR_SIGNALING_PATHWAY	INSULIN_RECEPTOR_SIGNALING_PATHWAY	1	1	320	19	0
INTEGRAL_TO_GOLGI_MEMBRANE	INTEGRAL_TO_GOLGI_MEMBRANE	1	1	320	9	0
INTEGRATOR_COMPLEX	INTEGRATOR_COMPLEX	1	1	320	11	0
INTEGRIN_BINDING	INTEGRIN_BINDING	1	1	320	29	0
INTEGRIN_COMPLEX	INTEGRIN_COMPLEX	1	1	320	19	0
INTERACTION_WITH_HOST	INTERACTION_WITH_HOST	1	1	320	17	0
INTERCALATED_DISC	INTERCALATED_DISC	1	1	320	9	0
INTERCELLULAR_JUNCTION	INTERCELLULAR_JUNCTION	1	1	320	63	0
INTERCELLULAR_JUNCTION_ASSEMBLY	INTERCELLULAR_JUNCTION_ASSEMBLY	1	1	320	11	0
INTERCELLULAR_JUNCTION_ASSEMBLY_AND_MAINTENANCE	INTERCELLULAR_JUNCTION_ASSEMBLY_AND_MAINTENANCE	1	1	320	13	0
INTERFERON_GAMMA_BIOSYNTHETIC_PROCESS	INTERFERON_GAMMA_BIOSYNTHETIC_PROCESS	1	1	320	12	0
INTERFERON_GAMMA_PRODUCTION	INTERFERON_GAMMA_PRODUCTION	1	1	320	14	0
INTERLEUKIN_1_SECRETION	INTERLEUKIN_1_SECRETION	1	1	320	10	0
INTERLEUKIN_2_PRODUCTION	INTERLEUKIN_2_PRODUCTION	1	1	320	11	0
INTERLEUKIN_8_BIOSYNTHETIC_PROCESS	INTERLEUKIN_8_BIOSYNTHETIC_PROCESS	1	1	320	10	0
INTERLEUKIN_8_PRODUCTION	INTERLEUKIN_8_PRODUCTION	1	1	320	12	0
INTERMEDIATE_FILAMENT	INTERMEDIATE_FILAMENT	1	1	320	24	0
INTERMEDIATE_FILAMENT_CYTOSKELETON	INTERMEDIATE_FILAMENT_CYTOSKELETON	1	1	320	24	0
INTERPHASE	INTERPHASE	1	1	320	68	0
INTERPHASE_OF_MITOTIC_CELL_CYCLE	INTERPHASE_OF_MITOTIC_CELL_CYCLE	1	1	320	62	0
INTRA_GOLGI_VESICLE_MEDIATED_TRANSPORT	INTRA_GOLGI_VESICLE_MEDIATED_TRANSPORT	1	1	320	12	0
INTRACELLULAR_PROTEIN_TRANSPORT	INTRACELLULAR_PROTEIN_TRANSPORT	1	1	320	142	0
INTRACELLULAR_RECEPTOR_MEDIATED_SIGNALING_PATHWAY	INTRACELLULAR_RECEPTOR_MEDIATED_SIGNALING_PATHWAY	1	1	320	21	0
INTRINSIC_TO_GOLGI_MEMBRANE	INTRINSIC_TO_GOLGI_MEMBRANE	1	1	320	14	0
IONOTROPIC_GLUTAMATE_RECEPTOR_ACTIVITY	IONOTROPIC_GLUTAMATE_RECEPTOR_ACTIVITY	1	1	320	10	0
ISOPRENOID_METABOLIC_PROCESS	ISOPRENOID_METABOLIC_PROCESS	1	1	320	12	0
KEGG_ADHERENS_JUNCTION	KEGG_ADHERENS_JUNCTION	0.324998	1	320	68	1	FGFR1
KEGG_ADIPOCYTOKINE_SIGNALING_PATHWAY	KEGG_ADIPOCYTOKINE_SIGNALING_PATHWAY	0.321083	1	320	67	1	IRS4
KEGG_ALANINE_ASPARTATE_AND_GLUTAMATE_METABOLISM	KEGG_ALANINE_ASPARTATE_AND_GLUTAMATE_METABOLISM	1	1	320	32	0
KEGG_ALPHA_LINOLENIC_ACID_METABOLISM	KEGG_ALPHA_LINOLENIC_ACID_METABOLISM	1	1	320	19	0
KEGG_AMINO_SUGAR_AND_NUCLEOTIDE_SUGAR_METABOLISM	KEGG_AMINO_SUGAR_AND_NUCLEOTIDE_SUGAR_METABOLISM	1	1	320	44	0
KEGG_AMINOACYL_TRNA_BIOSYNTHESIS	KEGG_AMINOACYL_TRNA_BIOSYNTHESIS	1	1	320	41	0
KEGG_ANTIGEN_PROCESSING_AND_PRESENTATION	KEGG_ANTIGEN_PROCESSING_AND_PRESENTATION	0.370261	1	320	80	1	HLA-DQA2
KEGG_B_CELL_RECEPTOR_SIGNALING_PATHWAY	KEGG_B_CELL_RECEPTOR_SIGNALING_PATHWAY	1	1	320	74	0
KEGG_BASAL_TRANSCRIPTION_FACTORS	KEGG_BASAL_TRANSCRIPTION_FACTORS	1	1	320	35	0
KEGG_BASE_EXCISION_REPAIR	KEGG_BASE_EXCISION_REPAIR	1	1	320	35	0
KEGG_BETA_ALANINE_METABOLISM	KEGG_BETA_ALANINE_METABOLISM	1	1	320	22	0
KEGG_BIOSYNTHESIS_OF_UNSATURATED_FATTY_ACIDS	KEGG_BIOSYNTHESIS_OF_UNSATURATED_FATTY_ACIDS	1	1	320	20	0
KEGG_BLADDER_CANCER	KEGG_BLADDER_CANCER	1	1	320	40	0
KEGG_BUTANOATE_METABOLISM	KEGG_BUTANOATE_METABOLISM	1	1	320	34	0
KEGG_CELL_CYCLE	KEGG_CELL_CYCLE	1	1	320	124	0
KEGG_CHRONIC_MYELOID_LEUKEMIA	KEGG_CHRONIC_MYELOID_LEUKEMIA	0.344239	1	320	73	1	SHC3
KEGG_CITRATE_CYCLE_TCA_CYCLE	KEGG_CITRATE_CYCLE_TCA_CYCLE	1	1	320	30	0
KEGG_COLORECTAL_CANCER	KEGG_COLORECTAL_CANCER	0.301165	1	320	62	1	BCL2
KEGG_COMPLEMENT_AND_COAGULATION_CASCADES	KEGG_COMPLEMENT_AND_COAGULATION_CASCADES	1	1	320	69	0
KEGG_CYTOSOLIC_DNA_SENSING_PATHWAY	KEGG_CYTOSOLIC_DNA_SENSING_PATHWAY	1	1	320	55	0
KEGG_DNA_REPLICATION	KEGG_DNA_REPLICATION	1	1	320	36	0
KEGG_ECM_RECEPTOR_INTERACTION	KEGG_ECM_RECEPTOR_INTERACTION	1	1	320	84	0
KEGG_ENDOMETRIAL_CANCER	KEGG_ENDOMETRIAL_CANCER	1	1	320	52	0
KEGG_EPITHELIAL_CELL_SIGNALING_IN_HELICOBACTER_PYLORI_INFECTION	KEGG_EPITHELIAL_CELL_SIGNALING_IN_HELICOBACTER_PYLORI_INFECTION	1	1	320	67	0
KEGG_FATTY_ACID_METABOLISM	KEGG_FATTY_ACID_METABOLISM	1	1	320	42	0
KEGG_FC_EPSILON_RI_SIGNALING_PATHWAY	KEGG_FC_EPSILON_RI_SIGNALING_PATHWAY	1	1	320	79	0
KEGG_FRUCTOSE_AND_MANNOSE_METABOLISM	KEGG_FRUCTOSE_AND_MANNOSE_METABOLISM	1	1	320	34	0
KEGG_GALACTOSE_METABOLISM	KEGG_GALACTOSE_METABOLISM	1	1	320	26	0
KEGG_GAP_JUNCTION	KEGG_GAP_JUNCTION	1	1	320	88	0
KEGG_GLIOMA	KEGG_GLIOMA	0.313185	1	320	65	1	SHC3
KEGG_GLYCOLYSIS_GLUCONEOGENESIS	KEGG_GLYCOLYSIS_GLUCONEOGENESIS	0.297112	1	320	61	1	ALDH3B2
KEGG_GLYCOSAMINOGLYCAN_BIOSYNTHESIS_CHONDROITIN_SULFATE	KEGG_GLYCOSAMINOGLYCAN_BIOSYNTHESIS_CHONDROITIN_SULFATE	1	1	320	22	0
KEGG_GLYCOSAMINOGLYCAN_BIOSYNTHESIS_HEPARAN_SULFATE	KEGG_GLYCOSAMINOGLYCAN_BIOSYNTHESIS_HEPARAN_SULFATE	1	1	320	26	0
KEGG_GLYCOSAMINOGLYCAN_BIOSYNTHESIS_KERATAN_SULFATE	KEGG_GLYCOSAMINOGLYCAN_BIOSYNTHESIS_KERATAN_SULFATE	1	1	320	14	0
KEGG_GLYCOSAMINOGLYCAN_DEGRADATION	KEGG_GLYCOSAMINOGLYCAN_DEGRADATION	1	1	320	21	0
KEGG_GLYCOSPHINGOLIPID_BIOSYNTHESIS_GANGLIO_SERIES	KEGG_GLYCOSPHINGOLIPID_BIOSYNTHESIS_GANGLIO_SERIES	1	1	320	15	0
KEGG_GLYCOSPHINGOLIPID_BIOSYNTHESIS_GLOBO_SERIES	KEGG_GLYCOSPHINGOLIPID_BIOSYNTHESIS_GLOBO_SERIES	1	1	320	14	0
KEGG_GLYCOSYLPHOSPHATIDYLINOSITOL_GPI_ANCHOR_BIOSYNTHESIS	KEGG_GLYCOSYLPHOSPHATIDYLINOSITOL_GPI_ANCHOR_BIOSYNTHESIS	1	1	320	25	0
KEGG_GLYOXYLATE_AND_DICARBOXYLATE_METABOLISM	KEGG_GLYOXYLATE_AND_DICARBOXYLATE_METABOLISM	1	1	320	16	0
KEGG_GNRH_SIGNALING_PATHWAY	KEGG_GNRH_SIGNALING_PATHWAY	0.442311	1	320	101	1	CACNA1C
KEGG_HOMOLOGOUS_RECOMBINATION	KEGG_HOMOLOGOUS_RECOMBINATION	1	1	320	26	0
KEGG_JAK_STAT_SIGNALING_PATHWAY	KEGG_JAK_STAT_SIGNALING_PATHWAY	1	1	320	151	0
KEGG_LEISHMANIA_INFECTION	KEGG_LEISHMANIA_INFECTION	0.332761	1	320	70	1	HLA-DQA2
KEGG_LEUKOCYTE_TRANSENDOTHELIAL_MIGRATION	KEGG_LEUKOCYTE_TRANSENDOTHELIAL_MIGRATION	1	1	320	115	0
KEGG_LIMONENE_AND_PINENE_DEGRADATION	KEGG_LIMONENE_AND_PINENE_DEGRADATION	1	1	320	10	0
KEGG_LINOLEIC_ACID_METABOLISM	KEGG_LINOLEIC_ACID_METABOLISM	1	1	320	29	0
KEGG_LONG_TERM_DEPRESSION	KEGG_LONG_TERM_DEPRESSION	0.324998	1	320	68	1	GRIA3
KEGG_LYSOSOME	KEGG_LYSOSOME	1	1	320	119	0
KEGG_MATURITY_ONSET_DIABETES_OF_THE_YOUNG	KEGG_MATURITY_ONSET_DIABETES_OF_THE_YOUNG	1	1	320	25	0
KEGG_MELANOGENESIS	KEGG_MELANOGENESIS	0.442311	1	320	101	1	WNT11
KEGG_MELANOMA	KEGG_MELANOMA	0.336609	1	320	71	1	FGFR1
KEGG_MISMATCH_REPAIR	KEGG_MISMATCH_REPAIR	1	1	320	23	0
KEGG_N_GLYCAN_BIOSYNTHESIS	KEGG_N_GLYCAN_BIOSYNTHESIS	1	1	320	46	0
KEGG_NATURAL_KILLER_CELL_MEDIATED_CYTOTOXICITY	KEGG_NATURAL_KILLER_CELL_MEDIATED_CYTOTOXICITY	0.531215	1	320	131	1	SHC3
KEGG_NICOTINATE_AND_NICOTINAMIDE_METABOLISM	KEGG_NICOTINATE_AND_NICOTINAMIDE_METABOLISM	1	1	320	22	0
KEGG_NITROGEN_METABOLISM	KEGG_NITROGEN_METABOLISM	1	1	320	23	0
KEGG_NOD_LIKE_RECEPTOR_SIGNALING_PATHWAY	KEGG_NOD_LIKE_RECEPTOR_SIGNALING_PATHWAY	0.293036	1	320	60	1	NLRP1
KEGG_NON_HOMOLOGOUS_END_JOINING	KEGG_NON_HOMOLOGOUS_END_JOINING	1	1	320	12	0
KEGG_NUCLEOTIDE_EXCISION_REPAIR	KEGG_NUCLEOTIDE_EXCISION_REPAIR	1	1	320	44	0
KEGG_ONE_CARBON_POOL_BY_FOLATE	KEGG_ONE_CARBON_POOL_BY_FOLATE	1	1	320	17	0
KEGG_OTHER_GLYCAN_DEGRADATION	KEGG_OTHER_GLYCAN_DEGRADATION	1	1	320	16	0
KEGG_OXIDATIVE_PHOSPHORYLATION	KEGG_OXIDATIVE_PHOSPHORYLATION	0.445529	1	320	102	1	NDUFC2
KEGG_P53_SIGNALING_PATHWAY	KEGG_P53_SIGNALING_PATHWAY	1	1	320	65	0
KEGG_PANCREATIC_CANCER	KEGG_PANCREATIC_CANCER	1	1	320	69	0
KEGG_PANTOTHENATE_AND_COA_BIOSYNTHESIS	KEGG_PANTOTHENATE_AND_COA_BIOSYNTHESIS	1	1	320	16	0
KEGG_PARKINSONS_DISEASE	KEGG_PARKINSONS_DISEASE	0.442311	1	320	101	1	NDUFC2
KEGG_PATHOGENIC_ESCHERICHIA_COLI_INFECTION	KEGG_PATHOGENIC_ESCHERICHIA_COLI_INFECTION	1	1	320	56	0
KEGG_PENTOSE_PHOSPHATE_PATHWAY	KEGG_PENTOSE_PHOSPHATE_PATHWAY	1	1	320	26	0
KEGG_PEROXISOME	KEGG_PEROXISOME	0.362933	1	320	78	1	AGPS
KEGG_PHOSPHATIDYLINOSITOL_SIGNALING_SYSTEM	KEGG_PHOSPHATIDYLINOSITOL_SIGNALING_SYSTEM	0.35552	1	320	76	1	PIK3C2G
KEGG_PPAR_SIGNALING_PATHWAY	KEGG_PPAR_SIGNALING_PATHWAY	1	1	320	69	0
KEGG_PRIMARY_BILE_ACID_BIOSYNTHESIS	KEGG_PRIMARY_BILE_ACID_BIOSYNTHESIS	1	1	320	16	0
KEGG_PRIMARY_IMMUNODEFICIENCY	KEGG_PRIMARY_IMMUNODEFICIENCY	1	1	320	35	0
KEGG_PRION_DISEASES	KEGG_PRION_DISEASES	1	1	320	35	0
KEGG_PROPANOATE_METABOLISM	KEGG_PROPANOATE_METABOLISM	1	1	320	32	0
KEGG_PROTEASOME	KEGG_PROTEASOME	1	1	320	45	0
KEGG_PROTEIN_EXPORT	KEGG_PROTEIN_EXPORT	1	1	320	23	0
KEGG_PROXIMAL_TUBULE_BICARBONATE_RECLAMATION	KEGG_PROXIMAL_TUBULE_BICARBONATE_RECLAMATION	1	1	320	23	0
KEGG_PYRIMIDINE_METABOLISM	KEGG_PYRIMIDINE_METABOLISM	1	1	320	96	0
KEGG_PYRUVATE_METABOLISM	KEGG_PYRUVATE_METABOLISM	1	1	320	39	0
KEGG_REGULATION_OF_AUTOPHAGY	KEGG_REGULATION_OF_AUTOPHAGY	1	1	320	34	0
KEGG_RENAL_CELL_CARCINOMA	KEGG_RENAL_CELL_CARCINOMA	0.317145	1	320	66	1	PAK6
KEGG_RENIN_ANGIOTENSIN_SYSTEM	KEGG_RENIN_ANGIOTENSIN_SYSTEM	1	1	320	17	0
KEGG_RIBOFLAVIN_METABOLISM	KEGG_RIBOFLAVIN_METABOLISM	1	1	320	15	0
KEGG_RIBOSOME	KEGG_RIBOSOME	1	1	320	88	0
KEGG_RIG_I_LIKE_RECEPTOR_SIGNALING_PATHWAY	KEGG_RIG_I_LIKE_RECEPTOR_SIGNALING_PATHWAY	1	1	320	69	0
KEGG_RNA_POLYMERASE	KEGG_RNA_POLYMERASE	1	1	320	29	0
KEGG_SELENOAMINO_ACID_METABOLISM	KEGG_SELENOAMINO_ACID_METABOLISM	1	1	320	25	0
KEGG_SPHINGOLIPID_METABOLISM	KEGG_SPHINGOLIPID_METABOLISM	1	1	320	36	0
KEGG_SPLICEOSOME	KEGG_SPLICEOSOME	1	1	320	123	0
KEGG_STEROID_BIOSYNTHESIS	KEGG_STEROID_BIOSYNTHESIS	1	1	320	16	0
KEGG_SYSTEMIC_LUPUS_ERYTHEMATOSUS	KEGG_SYSTEMIC_LUPUS_ERYTHEMATOSUS	0.544593	1	320	136	1	HLA-DQA2
KEGG_T_CELL_RECEPTOR_SIGNALING_PATHWAY	KEGG_T_CELL_RECEPTOR_SIGNALING_PATHWAY	0.458217	1	320	106	1	PAK6
KEGG_TASTE_TRANSDUCTION	KEGG_TASTE_TRANSDUCTION	1	1	320	50	0
KEGG_TAURINE_AND_HYPOTAURINE_METABOLISM	KEGG_TAURINE_AND_HYPOTAURINE_METABOLISM	1	1	320	10	0
KEGG_TERPENOID_BACKBONE_BIOSYNTHESIS	KEGG_TERPENOID_BACKBONE_BIOSYNTHESIS	1	1	320	15	0
KEGG_TGF_BETA_SIGNALING_PATHWAY	KEGG_TGF_BETA_SIGNALING_PATHWAY	1	1	320	85	0
KEGG_THYROID_CANCER	KEGG_THYROID_CANCER	1	1	320	29	0
KEGG_TIGHT_JUNCTION	KEGG_TIGHT_JUNCTION	1	1	320	128	0
KEGG_TOLL_LIKE_RECEPTOR_SIGNALING_PATHWAY	KEGG_TOLL_LIKE_RECEPTOR_SIGNALING_PATHWAY	1	1	320	101	0
KEGG_UBIQUITIN_MEDIATED_PROTEOLYSIS	KEGG_UBIQUITIN_MEDIATED_PROTEOLYSIS	1	1	320	130	0
KEGG_VALINE_LEUCINE_AND_ISOLEUCINE_BIOSYNTHESIS	KEGG_VALINE_LEUCINE_AND_ISOLEUCINE_BIOSYNTHESIS	1	1	320	11	0
KEGG_VALINE_LEUCINE_AND_ISOLEUCINE_DEGRADATION	KEGG_VALINE_LEUCINE_AND_ISOLEUCINE_DEGRADATION	1	1	320	44	0
KEGG_VASCULAR_SMOOTH_MUSCLE_CONTRACTION	KEGG_VASCULAR_SMOOTH_MUSCLE_CONTRACTION	0.479729	1	320	113	1	CACNA1C
KEGG_VASOPRESSIN_REGULATED_WATER_REABSORPTION	KEGG_VASOPRESSIN_REGULATED_WATER_REABSORPTION	1	1	320	44	0
KEGG_VEGF_SIGNALING_PATHWAY	KEGG_VEGF_SIGNALING_PATHWAY	1	1	320	75	0
KEGG_VIBRIO_CHOLERAE_INFECTION	KEGG_VIBRIO_CHOLERAE_INFECTION	1	1	320	53	0
KEGG_VIRAL_MYOCARDITIS	KEGG_VIRAL_MYOCARDITIS	0.324998	1	320	68	1	HLA-DQA2
KINASE_ACTIVATOR_ACTIVITY	KINASE_ACTIVATOR_ACTIVITY	1	1	320	12	0
KINASE_BINDING	KINASE_BINDING	0.332761	1	320	70	1	SPDYC
KINASE_INHIBITOR_ACTIVITY	KINASE_INHIBITOR_ACTIVITY	1	1	320	25	0
KINESIN_COMPLEX	KINESIN_COMPLEX	1	1	320	14	0
KINETOCHORE	KINETOCHORE	1	1	320	24	0
L_AMINO_ACID_TRANSMEMBRANE_TRANSPORTER_ACTIVITY	L_AMINO_ACID_TRANSMEMBRANE_TRANSPORTER_ACTIVITY	1	1	320	17	0
LAMELLIPODIUM	LAMELLIPODIUM	1	1	320	25	0
LATE_ENDOSOME	LATE_ENDOSOME	1	1	320	11	0
LEADING_EDGE	LEADING_EDGE	1	1	320	47	0
LEARNING_AND_OR_MEMORY	LEARNING_AND_OR_MEMORY	1	1	320	14	0
LEUKOCYTE_ACTIVATION	LEUKOCYTE_ACTIVATION	1	1	320	68	0
LEUKOCYTE_DIFFERENTIATION	LEUKOCYTE_DIFFERENTIATION	1	1	320	37	0
LIGASE_ACTIVITY	LIGASE_ACTIVITY	0.419257	1	320	94	1	GCLM
LIGASE_ACTIVITY_FORMING_CARBON_NITROGEN_BONDS	LIGASE_ACTIVITY_FORMING_CARBON_NITROGEN_BONDS	0.317145	1	320	66	1	GCLM
LIGASE_ACTIVITY_FORMING_CARBON_OXYGEN_BONDS	LIGASE_ACTIVITY_FORMING_CARBON_OXYGEN_BONDS	1	1	320	14	0
LIPASE_ACTIVITY	LIPASE_ACTIVITY	1	1	320	50	0
LIPID_BINDING	LIPID_BINDING	1	1	320	86	0
LIPID_CATABOLIC_PROCESS	LIPID_CATABOLIC_PROCESS	1	1	320	38	0
LIPID_HOMEOSTASIS	LIPID_HOMEOSTASIS	1	1	320	16	0
LIPID_KINASE_ACTIVITY	LIPID_KINASE_ACTIVITY	1	1	320	12	0
LIPID_RAFT	LIPID_RAFT	1	1	320	29	0
LIPID_TRANSPORTER_ACTIVITY	LIPID_TRANSPORTER_ACTIVITY	1	1	320	28	0
LIPOPROTEIN_BINDING	LIPOPROTEIN_BINDING	1	1	320	18	0
LIPOPROTEIN_BIOSYNTHETIC_PROCESS	LIPOPROTEIN_BIOSYNTHETIC_PROCESS	1	1	320	26	0
LOW_DENSITY_LIPOPROTEIN_BINDING	LOW_DENSITY_LIPOPROTEIN_BINDING	1	1	320	12	0
LYMPHOCYTE_ACTIVATION	LYMPHOCYTE_ACTIVATION	1	1	320	61	0
LYMPHOCYTE_DIFFERENTIATION	LYMPHOCYTE_DIFFERENTIATION	1	1	320	26	0
LYSOSOMAL_MEMBRANE	LYSOSOMAL_MEMBRANE	1	1	320	10	0
LYSOSOMAL_TRANSPORT	LYSOSOMAL_TRANSPORT	1	1	320	10	0
LYSOSOME	LYSOSOME	0.293036	1	320	60	1	LRP2
LYSOSOME_ORGANIZATION_AND_BIOGENESIS	LYSOSOME_ORGANIZATION_AND_BIOGENESIS	1	1	320	11	0
LYTIC_VACUOLE	LYTIC_VACUOLE	0.293036	1	320	60	1	LRP2
M_PHASE	M_PHASE	1	1	320	112	0
M_PHASE_OF_MITOTIC_CELL_CYCLE	M_PHASE_OF_MITOTIC_CELL_CYCLE	1	1	320	85	0
MACROMOLECULAR_COMPLEX_DISASSEMBLY	MACROMOLECULAR_COMPLEX_DISASSEMBLY	1	1	320	13	0
MACROMOLECULE_CATABOLIC_PROCESS	MACROMOLECULE_CATABOLIC_PROCESS	1	1	320	133	0
MAINTENANCE_OF_CELLULAR_LOCALIZATION	MAINTENANCE_OF_CELLULAR_LOCALIZATION	1	1	320	12	0
MAINTENANCE_OF_CELLULAR_PROTEIN_LOCALIZATION	MAINTENANCE_OF_CELLULAR_PROTEIN_LOCALIZATION	1	1	320	11	0
MAINTENANCE_OF_LOCALIZATION	MAINTENANCE_OF_LOCALIZATION	1	1	320	22	0
MAINTENANCE_OF_PROTEIN_LOCALIZATION	MAINTENANCE_OF_PROTEIN_LOCALIZATION	1	1	320	13	0
MANNOSYLTRANSFERASE_ACTIVITY	MANNOSYLTRANSFERASE_ACTIVITY	1	1	320	10	0
MAP_KINASE_ACTIVITY	MAP_KINASE_ACTIVITY	1	1	320	12	0
MAP_KINASE_KINASE_KINASE_ACTIVITY	MAP_KINASE_KINASE_KINASE_ACTIVITY	1	1	320	9	0
MEDIATOR_COMPLEX	MEDIATOR_COMPLEX	1	1	320	18	0
MEIOSIS_I	MEIOSIS_I	1	1	320	18	0
MEIOTIC_CELL_CYCLE	MEIOTIC_CELL_CYCLE	1	1	320	33	0
MEIOTIC_RECOMBINATION	MEIOTIC_RECOMBINATION	1	1	320	16	0
MEMBRANE_COAT	MEMBRANE_COAT	1	1	320	16	0
MEMBRANE_FUSION	MEMBRANE_FUSION	1	1	320	28	0
MEMBRANE_LIPID_BIOSYNTHETIC_PROCESS	MEMBRANE_LIPID_BIOSYNTHETIC_PROCESS	1	1	320	48	0
MEMBRANE_LIPID_METABOLIC_PROCESS	MEMBRANE_LIPID_METABOLIC_PROCESS	1	1	320	100	0
METABOTROPIC_GLUTAMATEGABA_B_LIKE_RECEPTOR_ACTIVITY	METABOTROPIC_GLUTAMATEGABA_B_LIKE_RECEPTOR_ACTIVITY	1	1	320	10	0
METALLOENDOPEPTIDASE_ACTIVITY	METALLOENDOPEPTIDASE_ACTIVITY	1	1	320	27	0
METALLOEXOPEPTIDASE_ACTIVITY	METALLOEXOPEPTIDASE_ACTIVITY	1	1	320	12	0
METALLOPEPTIDASE_ACTIVITY	METALLOPEPTIDASE_ACTIVITY	1	1	320	49	0
METHYLTRANSFERASE_ACTIVITY	METHYLTRANSFERASE_ACTIVITY	1	1	320	35	0
MICROBODY_MEMBRANE	MICROBODY_MEMBRANE	1	1	320	13	0
MICROBODY_PART	MICROBODY_PART	1	1	320	14	0
MICROSOME	MICROSOME	1	1	320	41	0
MICROTUBULE	MICROTUBULE	1	1	320	31	0
MICROTUBULE_BASED_MOVEMENT	MICROTUBULE_BASED_MOVEMENT	1	1	320	16	0
MICROTUBULE_BASED_PROCESS	MICROTUBULE_BASED_PROCESS	1	1	320	82	0
MICROTUBULE_CYTOSKELETON_ORGANIZATION_AND_BIOGENESIS	MICROTUBULE_CYTOSKELETON_ORGANIZATION_AND_BIOGENESIS	1	1	320	35	0
MICROTUBULE_MOTOR_ACTIVITY	MICROTUBULE_MOTOR_ACTIVITY	1	1	320	16	0
MICROTUBULE_ORGANIZING_CENTER	MICROTUBULE_ORGANIZING_CENTER	1	1	320	65	0
MICROTUBULE_ORGANIZING_CENTER_ORGANIZATION_AND_BIOGENESIS	MICROTUBULE_ORGANIZING_CENTER_ORGANIZATION_AND_BIOGENESIS	1	1	320	16	0
MICROTUBULE_ORGANIZING_CENTER_PART	MICROTUBULE_ORGANIZING_CENTER_PART	1	1	320	19	0
MICROTUBULE_POLYMERIZATION_OR_DEPOLYMERIZATION	MICROTUBULE_POLYMERIZATION_OR_DEPOLYMERIZATION	1	1	320	11	0
MICROVILLUS	MICROVILLUS	1	1	320	10	0
MITOCHONDRIAL_INNER_MEMBRANE	MITOCHONDRIAL_INNER_MEMBRANE	1	1	320	56	0
MITOCHONDRIAL_LUMEN	MITOCHONDRIAL_LUMEN	1	1	320	44	0
MITOCHONDRIAL_MATRIX	MITOCHONDRIAL_MATRIX	1	1	320	44	0
MITOCHONDRIAL_MEMBRANE	MITOCHONDRIAL_MEMBRANE	0.351781	1	320	75	1	BCL2
MITOCHONDRIAL_MEMBRANE_PART	MITOCHONDRIAL_MEMBRANE_PART	1	1	320	43	0
MITOCHONDRIAL_RESPIRATORY_CHAIN	MITOCHONDRIAL_RESPIRATORY_CHAIN	1	1	320	23	0
MITOCHONDRIAL_RESPIRATORY_CHAIN_COMPLEX_I	MITOCHONDRIAL_RESPIRATORY_CHAIN_COMPLEX_I	1	1	320	14	0
MITOCHONDRIAL_RIBOSOME	MITOCHONDRIAL_RIBOSOME	1	1	320	22	0
MITOCHONDRIAL_SMALL_RIBOSOMAL_SUBUNIT	MITOCHONDRIAL_SMALL_RIBOSOMAL_SUBUNIT	1	1	320	11	0
MITOSIS	MITOSIS	1	1	320	82	0
MITOTIC_CELL_CYCLE	MITOTIC_CELL_CYCLE	1	1	320	153	0
MITOTIC_CELL_CYCLE_CHECKPOINT	MITOTIC_CELL_CYCLE_CHECKPOINT	1	1	320	21	0
MITOTIC_SISTER_CHROMATID_SEGREGATION	MITOTIC_SISTER_CHROMATID_SEGREGATION	1	1	320	16	0
MITOTIC_SPINDLE_ORGANIZATION_AND_BIOGENESIS	MITOTIC_SPINDLE_ORGANIZATION_AND_BIOGENESIS	1	1	320	10	0
MONOCARBOXYLIC_ACID_TRANSMEMBRANE_TRANSPORTER_ACTIVITY	MONOCARBOXYLIC_ACID_TRANSMEMBRANE_TRANSPORTER_ACTIVITY	1	1	320	11	0
MONOCARBOXYLIC_ACID_TRANSPORT	MONOCARBOXYLIC_ACID_TRANSPORT	1	1	320	10	0
MONOSACCHARIDE_BINDING	MONOSACCHARIDE_BINDING	1	1	320	11	0
MONOSACCHARIDE_TRANSMEMBRANE_TRANSPORTER_ACTIVITY	MONOSACCHARIDE_TRANSMEMBRANE_TRANSPORTER_ACTIVITY	1	1	320	10	0
MORPHOGENESIS_OF_AN_EPITHELIUM	MORPHOGENESIS_OF_AN_EPITHELIUM	1	1	320	16	0
MOTOR_ACTIVITY	MOTOR_ACTIVITY	1	1	320	28	0
MRNA_BINDING	MRNA_BINDING	1	1	320	22	0
MRNA_METABOLIC_PROCESS	MRNA_METABOLIC_PROCESS	0.384666	1	320	84	1	LSM1
MRNA_PROCESSING_GO_0006397	MRNA_PROCESSING_GO_0006397	0.344239	1	320	73	1	LSM1
MRNA_SPLICE_SITE_SELECTION	MRNA_SPLICE_SITE_SELECTION	1	1	320	13	0
MUSCLE_DEVELOPMENT	MUSCLE_DEVELOPMENT	0.40566	1	320	90	1	TBX3
MYELOID_CELL_DIFFERENTIATION	MYELOID_CELL_DIFFERENTIATION	1	1	320	36	0
MYELOID_LEUKOCYTE_DIFFERENTIATION	MYELOID_LEUKOCYTE_DIFFERENTIATION	1	1	320	14	0
MYOFIBRIL	MYOFIBRIL	1	1	320	19	0
MYOSIN_COMPLEX	MYOSIN_COMPLEX	1	1	320	16	0
N_ACETYLGLUCOSAMINE_METABOLIC_PROCESS	N_ACETYLGLUCOSAMINE_METABOLIC_PROCESS	1	1	320	11	0
N_ACETYLTRANSFERASE_ACTIVITY	N_ACETYLTRANSFERASE_ACTIVITY	1	1	320	21	0
N_ACYLTRANSFERASE_ACTIVITY	N_ACYLTRANSFERASE_ACTIVITY	1	1	320	24	0
N_METHYLTRANSFERASE_ACTIVITY	N_METHYLTRANSFERASE_ACTIVITY	1	1	320	12	0
N_TERMINAL_PROTEIN_AMINO_ACID_MODIFICATION	N_TERMINAL_PROTEIN_AMINO_ACID_MODIFICATION	1	1	320	11	0
NADH_DEHYDROGENASE_COMPLEX	NADH_DEHYDROGENASE_COMPLEX	1	1	320	14	0
NEGATIVE_REGULATION_OF_ANGIOGENESIS	NEGATIVE_REGULATION_OF_ANGIOGENESIS	1	1	320	13	0
NEGATIVE_REGULATION_OF_BIOSYNTHETIC_PROCESS	NEGATIVE_REGULATION_OF_BIOSYNTHETIC_PROCESS	1	1	320	30	0
NEGATIVE_REGULATION_OF_CELL_ADHESION	NEGATIVE_REGULATION_OF_CELL_ADHESION	1	1	320	17	0
NEGATIVE_REGULATION_OF_CELL_CYCLE	NEGATIVE_REGULATION_OF_CELL_CYCLE	1	1	320	77	0
NEGATIVE_REGULATION_OF_CELL_MIGRATION	NEGATIVE_REGULATION_OF_CELL_MIGRATION	1	1	320	15	0
NEGATIVE_REGULATION_OF_CELL_PROLIFERATION	NEGATIVE_REGULATION_OF_CELL_PROLIFERATION	0.57762	1	320	149	1	SSTR2
NEGATIVE_REGULATION_OF_CELLULAR_BIOSYNTHETIC_PROCESS	NEGATIVE_REGULATION_OF_CELLULAR_BIOSYNTHETIC_PROCESS	1	1	320	29	0
NEGATIVE_REGULATION_OF_CELLULAR_COMPONENT_ORGANIZATION_AND_BIOGENESIS	NEGATIVE_REGULATION_OF_CELLULAR_COMPONENT_ORGANIZATION_AND_BIOGENESIS	1	1	320	29	0
NEGATIVE_REGULATION_OF_CELLULAR_PROTEIN_METABOLIC_PROCESS	NEGATIVE_REGULATION_OF_CELLULAR_PROTEIN_METABOLIC_PROCESS	1	1	320	44	0
NEGATIVE_REGULATION_OF_CYTOKINE_BIOSYNTHETIC_PROCESS	NEGATIVE_REGULATION_OF_CYTOKINE_BIOSYNTHETIC_PROCESS	1	1	320	12	0
NEGATIVE_REGULATION_OF_CYTOSKELETON_ORGANIZATION_AND_BIOGENESIS	NEGATIVE_REGULATION_OF_CYTOSKELETON_ORGANIZATION_AND_BIOGENESIS	1	1	320	11	0
NEGATIVE_REGULATION_OF_DNA_METABOLIC_PROCESS	NEGATIVE_REGULATION_OF_DNA_METABOLIC_PROCESS	1	1	320	18	0
NEGATIVE_REGULATION_OF_DNA_REPLICATION	NEGATIVE_REGULATION_OF_DNA_REPLICATION	1	1	320	13	0
NEGATIVE_REGULATION_OF_GROWTH	NEGATIVE_REGULATION_OF_GROWTH	1	1	320	40	0
NEGATIVE_REGULATION_OF_IMMUNE_SYSTEM_PROCESS	NEGATIVE_REGULATION_OF_IMMUNE_SYSTEM_PROCESS	1	1	320	14	0
NEGATIVE_REGULATION_OF_INTRACELLULAR_TRANSPORT	NEGATIVE_REGULATION_OF_INTRACELLULAR_TRANSPORT	1	1	320	11	0
NEGATIVE_REGULATION_OF_MAP_KINASE_ACTIVITY	NEGATIVE_REGULATION_OF_MAP_KINASE_ACTIVITY	1	1	320	17	0
NEGATIVE_REGULATION_OF_MULTICELLULAR_ORGANISMAL_PROCESS	NEGATIVE_REGULATION_OF_MULTICELLULAR_ORGANISMAL_PROCESS	1	1	320	31	0
NEGATIVE_REGULATION_OF_MYELOID_CELL_DIFFERENTIATION	NEGATIVE_REGULATION_OF_MYELOID_CELL_DIFFERENTIATION	1	1	320	10	0
NEGATIVE_REGULATION_OF_PHOSPHATE_METABOLIC_PROCESS	NEGATIVE_REGULATION_OF_PHOSPHATE_METABOLIC_PROCESS	1	1	320	12	0
NEGATIVE_REGULATION_OF_PHOSPHORYLATION	NEGATIVE_REGULATION_OF_PHOSPHORYLATION	1	1	320	12	0
NEGATIVE_REGULATION_OF_PROTEIN_METABOLIC_PROCESS	NEGATIVE_REGULATION_OF_PROTEIN_METABOLIC_PROCESS	1	1	320	47	0
NEGATIVE_REGULATION_OF_RESPONSE_TO_STIMULUS	NEGATIVE_REGULATION_OF_RESPONSE_TO_STIMULUS	1	1	320	11	0
NEGATIVE_REGULATION_OF_SECRETION	NEGATIVE_REGULATION_OF_SECRETION	1	1	320	13	0
NEGATIVE_REGULATION_OF_TRANSCRIPTION_FACTOR_ACTIVITY	NEGATIVE_REGULATION_OF_TRANSCRIPTION_FACTOR_ACTIVITY	1	1	320	15	0
NEGATIVE_REGULATION_OF_TRANSCRIPTION_FROM_RNA_POLYMERASE_II_PROMOTER	NEGATIVE_REGULATION_OF_TRANSCRIPTION_FROM_RNA_POLYMERASE_II_PROMOTER	0.373894	1	320	81	1	ZNF177
NEGATIVE_REGULATION_OF_TRANSFERASE_ACTIVITY	NEGATIVE_REGULATION_OF_TRANSFERASE_ACTIVITY	1	1	320	34	0
NEGATIVE_REGULATION_OF_TRANSLATION	NEGATIVE_REGULATION_OF_TRANSLATION	1	1	320	23	0
NEGATIVE_REGULATION_OF_TRANSPORT	NEGATIVE_REGULATION_OF_TRANSPORT	1	1	320	20	0
NEUROPEPTIDE_HORMONE_ACTIVITY	NEUROPEPTIDE_HORMONE_ACTIVITY	1	1	320	12	0
NEUROPEPTIDE_SIGNALING_PATHWAY	NEUROPEPTIDE_SIGNALING_PATHWAY	1	1	320	14	0
NEUTRAL_AMINO_ACID_TRANSMEMBRANE_TRANSPORTER_ACTIVITY	NEUTRAL_AMINO_ACID_TRANSMEMBRANE_TRANSPORTER_ACTIVITY	1	1	320	12	0
NEUTRAL_AMINO_ACID_TRANSPORT	NEUTRAL_AMINO_ACID_TRANSPORT	1	1	320	10	0
NF_KAPPAB_BINDING	NF_KAPPAB_BINDING	1	1	320	11	0
NLS_BEARING_SUBSTRATE_IMPORT_INTO_NUCLEUS	NLS_BEARING_SUBSTRATE_IMPORT_INTO_NUCLEUS	1	1	320	12	0
NON_MEMBRANE_SPANNING_PROTEIN_TYROSINE_KINASE_ACTIVITY	NON_MEMBRANE_SPANNING_PROTEIN_TYROSINE_KINASE_ACTIVITY	1	1	320	11	0
NOTCH_SIGNALING_PATHWAY	NOTCH_SIGNALING_PATHWAY	1	1	320	12	0
NUCLEAR_BODY	NUCLEAR_BODY	1	1	320	32	0
NUCLEAR_CHROMATIN	NUCLEAR_CHROMATIN	1	1	320	14	0
NUCLEAR_CHROMOSOME	NUCLEAR_CHROMOSOME	1	1	320	51	0
NUCLEAR_CHROMOSOME_PART	NUCLEAR_CHROMOSOME_PART	1	1	320	33	0
NUCLEAR_DNA_DIRECTED_RNA_POLYMERASE_COMPLEX	NUCLEAR_DNA_DIRECTED_RNA_POLYMERASE_COMPLEX	1	1	320	17	0
NUCLEAR_ENVELOPE	NUCLEAR_ENVELOPE	0.340435	1	320	72	1	BCL2
NUCLEAR_ENVELOPE_ENDOPLASMIC_RETICULUM_NETWORK	NUCLEAR_ENVELOPE_ENDOPLASMIC_RETICULUM_NETWORK	0.412498	1	320	92	1	RTN1
NUCLEAR_EXPORT	NUCLEAR_EXPORT	1	1	320	33	0
NUCLEAR_HORMONE_RECEPTOR_BINDING	NUCLEAR_HORMONE_RECEPTOR_BINDING	1	1	320	28	0
NUCLEAR_IMPORT	NUCLEAR_IMPORT	1	1	320	49	0
NUCLEAR_MATRIX	NUCLEAR_MATRIX	1	1	320	12	0
NUCLEAR_MEMBRANE_PART	NUCLEAR_MEMBRANE_PART	1	1	320	41	0
NUCLEAR_ORGANIZATION_AND_BIOGENESIS	NUCLEAR_ORGANIZATION_AND_BIOGENESIS	1	1	320	29	0
NUCLEAR_PORE	NUCLEAR_PORE	1	1	320	30	0
NUCLEAR_REPLICATION_FORK	NUCLEAR_REPLICATION_FORK	1	1	320	10	0
NUCLEAR_SPECK	NUCLEAR_SPECK	1	1	320	10	0
NUCLEAR_TRANSPORT	NUCLEAR_TRANSPORT	1	1	320	87	0
NUCLEAR_UBIQUITIN_LIGASE_COMPLEX	NUCLEAR_UBIQUITIN_LIGASE_COMPLEX	1	1	320	10	0
NUCLEASE_ACTIVITY	NUCLEASE_ACTIVITY	1	1	320	54	0
NUCLEOBASENUCLEOSIDENUCLEOTIDE_AND_NUCLEIC_ACID_TRANSMEMBRANE_TRANSPORTER_ACTIVITY	NUCLEOBASENUCLEOSIDENUCLEOTIDE_AND_NUCLEIC_ACID_TRANSMEMBRANE_TRANSPORTER_ACTIVITY	1	1	320	10	0
NUCLEOBASENUCLEOSIDENUCLEOTIDE_AND_NUCLEIC_ACID_TRANSPORT	NUCLEOBASENUCLEOSIDENUCLEOTIDE_AND_NUCLEIC_ACID_TRANSPORT	1	1	320	31	0
NUCLEOBASENUCLEOSIDENUCLEOTIDE_KINASE_ACTIVITY	NUCLEOBASENUCLEOSIDENUCLEOTIDE_KINASE_ACTIVITY	1	1	320	25	0
NUCLEOCYTOPLASMIC_TRANSPORT	NUCLEOCYTOPLASMIC_TRANSPORT	1	1	320	86	0
NUCLEOLAR_PART	NUCLEOLAR_PART	1	1	320	18	0
NUCLEOLUS	NUCLEOLUS	1	1	320	118	0
NUCLEOTIDE_BIOSYNTHETIC_PROCESS	NUCLEOTIDE_BIOSYNTHETIC_PROCESS	1	1	320	18	0
NUCLEOTIDE_EXCISION_REPAIR	NUCLEOTIDE_EXCISION_REPAIR	1	1	320	20	0
NUCLEOTIDE_KINASE_ACTIVITY	NUCLEOTIDE_KINASE_ACTIVITY	1	1	320	13	0
NUCLEOTIDE_SUGAR_METABOLIC_PROCESS	NUCLEOTIDE_SUGAR_METABOLIC_PROCESS	1	1	320	10	0
NUCLEOTIDYLTRANSFERASE_ACTIVITY	NUCLEOTIDYLTRANSFERASE_ACTIVITY	1	1	320	47	0
OLIGOSACCHARIDE_METABOLIC_PROCESS	OLIGOSACCHARIDE_METABOLIC_PROCESS	1	1	320	11	0
OLIGOSACCHARYL_TRANSFERASE_COMPLEX	OLIGOSACCHARYL_TRANSFERASE_COMPLEX	1	1	320	10	0
ONE_CARBON_COMPOUND_METABOLIC_PROCESS	ONE_CARBON_COMPOUND_METABOLIC_PROCESS	1	1	320	25	0
ORGANELLAR_RIBOSOME	ORGANELLAR_RIBOSOME	1	1	320	22	0
ORGANELLAR_SMALL_RIBOSOMAL_SUBUNIT	ORGANELLAR_SMALL_RIBOSOMAL_SUBUNIT	1	1	320	11	0
ORGANELLE_INNER_MEMBRANE	ORGANELLE_INNER_MEMBRANE	1	1	320	64	0
ORGANELLE_LOCALIZATION	ORGANELLE_LOCALIZATION	1	1	320	25	0
ORGANIC_ACID_TRANSMEMBRANE_TRANSPORTER_ACTIVITY	ORGANIC_ACID_TRANSMEMBRANE_TRANSPORTER_ACTIVITY	1	1	320	45	0
ORGANIC_ACID_TRANSPORT	ORGANIC_ACID_TRANSPORT	1	1	320	42	0
ORGANIC_ANION_TRANSMEMBRANE_TRANSPORTER_ACTIVITY	ORGANIC_ANION_TRANSMEMBRANE_TRANSPORTER_ACTIVITY	1	1	320	10	0
OVULATION_CYCLE	OVULATION_CYCLE	1	1	320	14	0
OXIDOREDUCTASE_ACTIVITY_ACTING_ON_CH_OH_GROUP_OF_DONORS	OXIDOREDUCTASE_ACTIVITY_ACTING_ON_CH_OH_GROUP_OF_DONORS	0.305195	1	320	63	1	AKR7A3
OXIDOREDUCTASE_ACTIVITY_ACTING_ON_NADH_OR_NADPH	OXIDOREDUCTASE_ACTIVITY_ACTING_ON_NADH_OR_NADPH	1	1	320	25	0
OXIDOREDUCTASE_ACTIVITY_ACTING_ON_SULFUR_GROUP_OF_DONORS	OXIDOREDUCTASE_ACTIVITY_ACTING_ON_SULFUR_GROUP_OF_DONORS	1	1	320	10	0
OXIDOREDUCTASE_ACTIVITY_ACTING_ON_THE_CH_CH_GROUP_OF_DONORS	OXIDOREDUCTASE_ACTIVITY_ACTING_ON_THE_CH_CH_GROUP_OF_DONORS	1	1	320	23	0
OXIDOREDUCTASE_ACTIVITY_ACTING_ON_THE_CH_NH_GROUP_OF_DONORS	OXIDOREDUCTASE_ACTIVITY_ACTING_ON_THE_CH_NH_GROUP_OF_DONORS	1	1	320	10	0
OXYGEN_AND_REACTIVE_OXYGEN_SPECIES_METABOLIC_PROCESS	OXYGEN_AND_REACTIVE_OXYGEN_SPECIES_METABOLIC_PROCESS	1	1	320	20	0
OXYGEN_BINDING	OXYGEN_BINDING	1	1	320	22	0
PATTERN_BINDING	PATTERN_BINDING	1	1	320	44	0
PATTERN_RECOGNITION_RECEPTOR_ACTIVITY	PATTERN_RECOGNITION_RECEPTOR_ACTIVITY	1	1	320	10	0
PEPTIDASE_ACTIVITY	PEPTIDASE_ACTIVITY	1	1	320	170	0
PEPTIDE_BINDING	PEPTIDE_BINDING	0.384666	1	320	84	1	SSTR2
PEPTIDE_METABOLIC_PROCESS	PEPTIDE_METABOLIC_PROCESS	1	1	320	9	0
PEPTIDYL_AMINO_ACID_MODIFICATION	PEPTIDYL_AMINO_ACID_MODIFICATION	1	1	320	62	0
PEPTIDYL_TYROSINE_MODIFICATION	PEPTIDYL_TYROSINE_MODIFICATION	1	1	320	28	0
PEPTIDYL_TYROSINE_PHOSPHORYLATION	PEPTIDYL_TYROSINE_PHOSPHORYLATION	1	1	320	26	0
PERINUCLEAR_REGION_OF_CYTOPLASM	PERINUCLEAR_REGION_OF_CYTOPLASM	1	1	320	53	0
PERIPHERAL_NERVOUS_SYSTEM_DEVELOPMENT	PERIPHERAL_NERVOUS_SYSTEM_DEVELOPMENT	1	1	320	10	0
PEROXISOMAL_MEMBRANE	PEROXISOMAL_MEMBRANE	1	1	320	13	0
PEROXISOMAL_PART	PEROXISOMAL_PART	1	1	320	14	0
PEROXISOME_ORGANIZATION_AND_BIOGENESIS	PEROXISOME_ORGANIZATION_AND_BIOGENESIS	1	1	320	16	0
PHAGOCYTOSIS	PHAGOCYTOSIS	1	1	320	17	0
PHOSPHATASE_BINDING	PHOSPHATASE_BINDING	1	1	320	12	0
PHOSPHATASE_INHIBITOR_ACTIVITY	PHOSPHATASE_INHIBITOR_ACTIVITY	1	1	320	11	0
PHOSPHATASE_REGULATOR_ACTIVITY	PHOSPHATASE_REGULATOR_ACTIVITY	1	1	320	25	0
PHOSPHOINOSITIDE_BINDING	PHOSPHOINOSITIDE_BINDING	1	1	320	20	0
PHOSPHOINOSITIDE_BIOSYNTHETIC_PROCESS	PHOSPHOINOSITIDE_BIOSYNTHETIC_PROCESS	1	1	320	24	0
PHOSPHOINOSITIDE_MEDIATED_SIGNALING	PHOSPHOINOSITIDE_MEDIATED_SIGNALING	1	1	320	47	0
PHOSPHOINOSITIDE_METABOLIC_PROCESS	PHOSPHOINOSITIDE_METABOLIC_PROCESS	1	1	320	31	0
PHOSPHOLIPASE_A2_ACTIVITY	PHOSPHOLIPASE_A2_ACTIVITY	1	1	320	13	0
PHOSPHOLIPASE_ACTIVITY	PHOSPHOLIPASE_ACTIVITY	1	1	320	42	0
PHOSPHOLIPASE_C_ACTIVATION	PHOSPHOLIPASE_C_ACTIVATION	1	1	320	14	0
PHOSPHOLIPASE_C_ACTIVITY	PHOSPHOLIPASE_C_ACTIVITY	1	1	320	15	0
PHOSPHOLIPID_BINDING	PHOSPHOLIPID_BINDING	1	1	320	46	0
PHOSPHOLIPID_BIOSYNTHETIC_PROCESS	PHOSPHOLIPID_BIOSYNTHETIC_PROCESS	1	1	320	39	0
PHOSPHOLIPID_METABOLIC_PROCESS	PHOSPHOLIPID_METABOLIC_PROCESS	1	1	320	74	0
PHOSPHOLIPID_TRANSPORTER_ACTIVITY	PHOSPHOLIPID_TRANSPORTER_ACTIVITY	1	1	320	12	0
PHOSPHORUS_OXYGEN_LYASE_ACTIVITY	PHOSPHORUS_OXYGEN_LYASE_ACTIVITY	1	1	320	8	0
PHOSPHOTRANSFERASE_ACTIVITY_PHOSPHATE_GROUP_AS_ACCEPTOR	PHOSPHOTRANSFERASE_ACTIVITY_PHOSPHATE_GROUP_AS_ACCEPTOR	1	1	320	18	0
PHOTORECEPTOR_CELL_MAINTENANCE	PHOTORECEPTOR_CELL_MAINTENANCE	1	1	320	9	0
PHOTOTRANSDUCTION	PHOTOTRANSDUCTION	1	1	320	13	0
PIGMENT_BIOSYNTHETIC_PROCESS	PIGMENT_BIOSYNTHETIC_PROCESS	1	1	320	17	0
PIGMENT_METABOLIC_PROCESS	PIGMENT_METABOLIC_PROCESS	1	1	320	18	0
PML_BODY	PML_BODY	1	1	320	14	0
POLYSACCHARIDE_BINDING	POLYSACCHARIDE_BINDING	1	1	320	35	0
POLYSACCHARIDE_METABOLIC_PROCESS	POLYSACCHARIDE_METABOLIC_PROCESS	1	1	320	18	0
PORE_COMPLEX	PORE_COMPLEX	1	1	320	35	0
POSITIVE_REGULATION_OF_ANGIOGENESIS	POSITIVE_REGULATION_OF_ANGIOGENESIS	1	1	320	10	0
POSITIVE_REGULATION_OF_BINDING	POSITIVE_REGULATION_OF_BINDING	1	1	320	28	0
POSITIVE_REGULATION_OF_CASPASE_ACTIVITY	POSITIVE_REGULATION_OF_CASPASE_ACTIVITY	1	1	320	30	0
POSITIVE_REGULATION_OF_CATALYTIC_ACTIVITY	POSITIVE_REGULATION_OF_CATALYTIC_ACTIVITY	1	1	320	160	0
POSITIVE_REGULATION_OF_CELL_ADHESION	POSITIVE_REGULATION_OF_CELL_ADHESION	1	1	320	13	0
POSITIVE_REGULATION_OF_CELL_DIFFERENTIATION	POSITIVE_REGULATION_OF_CELL_DIFFERENTIATION	1	1	320	25	0
POSITIVE_REGULATION_OF_CELL_MIGRATION	POSITIVE_REGULATION_OF_CELL_MIGRATION	1	1	320	10	0
POSITIVE_REGULATION_OF_CELLULAR_COMPONENT_ORGANIZATION_AND_BIOGENESIS	POSITIVE_REGULATION_OF_CELLULAR_COMPONENT_ORGANIZATION_AND_BIOGENESIS	1	1	320	36	0
POSITIVE_REGULATION_OF_CELLULAR_PROTEIN_METABOLIC_PROCESS	POSITIVE_REGULATION_OF_CELLULAR_PROTEIN_METABOLIC_PROCESS	1	1	320	71	0
POSITIVE_REGULATION_OF_CYTOKINE_BIOSYNTHETIC_PROCESS	POSITIVE_REGULATION_OF_CYTOKINE_BIOSYNTHETIC_PROCESS	1	1	320	25	0
POSITIVE_REGULATION_OF_CYTOKINE_PRODUCTION	POSITIVE_REGULATION_OF_CYTOKINE_PRODUCTION	1	1	320	15	0
POSITIVE_REGULATION_OF_CYTOKINE_SECRETION	POSITIVE_REGULATION_OF_CYTOKINE_SECRETION	1	1	320	10	0
POSITIVE_REGULATION_OF_CYTOSKELETON_ORGANIZATION_AND_BIOGENESIS	POSITIVE_REGULATION_OF_CYTOSKELETON_ORGANIZATION_AND_BIOGENESIS	1	1	320	10	0
POSITIVE_REGULATION_OF_DEFENSE_RESPONSE	POSITIVE_REGULATION_OF_DEFENSE_RESPONSE	1	1	320	10	0
POSITIVE_REGULATION_OF_DNA_BINDING	POSITIVE_REGULATION_OF_DNA_BINDING	1	1	320	26	0
POSITIVE_REGULATION_OF_DNA_METABOLIC_PROCESS	POSITIVE_REGULATION_OF_DNA_METABOLIC_PROCESS	1	1	320	11	0
POSITIVE_REGULATION_OF_EPITHELIAL_CELL_PROLIFERATION	POSITIVE_REGULATION_OF_EPITHELIAL_CELL_PROLIFERATION	1	1	320	10	0
POSITIVE_REGULATION_OF_HYDROLASE_ACTIVITY	POSITIVE_REGULATION_OF_HYDROLASE_ACTIVITY	1	1	320	54	0
POSITIVE_REGULATION_OF_IMMUNE_RESPONSE	POSITIVE_REGULATION_OF_IMMUNE_RESPONSE	1	1	320	28	0
POSITIVE_REGULATION_OF_IMMUNE_SYSTEM_PROCESS	POSITIVE_REGULATION_OF_IMMUNE_SYSTEM_PROCESS	1	1	320	50	0
POSITIVE_REGULATION_OF_JNK_ACTIVITY	POSITIVE_REGULATION_OF_JNK_ACTIVITY	1	1	320	15	0
POSITIVE_REGULATION_OF_LYMPHOCYTE_ACTIVATION	POSITIVE_REGULATION_OF_LYMPHOCYTE_ACTIVATION	1	1	320	24	0
POSITIVE_REGULATION_OF_MAP_KINASE_ACTIVITY	POSITIVE_REGULATION_OF_MAP_KINASE_ACTIVITY	1	1	320	44	0
POSITIVE_REGULATION_OF_MAPKKK_CASCADE	POSITIVE_REGULATION_OF_MAPKKK_CASCADE	1	1	320	11	0
POSITIVE_REGULATION_OF_MULTICELLULAR_ORGANISMAL_PROCESS	POSITIVE_REGULATION_OF_MULTICELLULAR_ORGANISMAL_PROCESS	1	1	320	65	0
POSITIVE_REGULATION_OF_PEPTIDYL_TYROSINE_PHOSPHORYLATION	POSITIVE_REGULATION_OF_PEPTIDYL_TYROSINE_PHOSPHORYLATION	1	1	320	12	0
POSITIVE_REGULATION_OF_PHOSPHATE_METABOLIC_PROCESS	POSITIVE_REGULATION_OF_PHOSPHATE_METABOLIC_PROCESS	1	1	320	26	0
POSITIVE_REGULATION_OF_PHOSPHORYLATION	POSITIVE_REGULATION_OF_PHOSPHORYLATION	1	1	320	25	0
POSITIVE_REGULATION_OF_PROTEIN_AMINO_ACID_PHOSPHORYLATION	POSITIVE_REGULATION_OF_PROTEIN_AMINO_ACID_PHOSPHORYLATION	1	1	320	19	0
POSITIVE_REGULATION_OF_PROTEIN_METABOLIC_PROCESS	POSITIVE_REGULATION_OF_PROTEIN_METABOLIC_PROCESS	1	1	320	73	0
POSITIVE_REGULATION_OF_PROTEIN_MODIFICATION_PROCESS	POSITIVE_REGULATION_OF_PROTEIN_MODIFICATION_PROCESS	1	1	320	27	0
POSITIVE_REGULATION_OF_PROTEIN_SECRETION	POSITIVE_REGULATION_OF_PROTEIN_SECRETION	1	1	320	12	0
POSITIVE_REGULATION_OF_RESPONSE_TO_STIMULUS	POSITIVE_REGULATION_OF_RESPONSE_TO_STIMULUS	1	1	320	39	0
POSITIVE_REGULATION_OF_SECRETION	POSITIVE_REGULATION_OF_SECRETION	1	1	320	20	0
POSITIVE_REGULATION_OF_T_CELL_ACTIVATION	POSITIVE_REGULATION_OF_T_CELL_ACTIVATION	1	1	320	21	0
POSITIVE_REGULATION_OF_T_CELL_PROLIFERATION	POSITIVE_REGULATION_OF_T_CELL_PROLIFERATION	1	1	320	13	0
POSITIVE_REGULATION_OF_TRANSCRIPTION_FACTOR_ACTIVITY	POSITIVE_REGULATION_OF_TRANSCRIPTION_FACTOR_ACTIVITY	1	1	320	24	0
POSITIVE_REGULATION_OF_TRANSFERASE_ACTIVITY	POSITIVE_REGULATION_OF_TRANSFERASE_ACTIVITY	1	1	320	82	0
POSITIVE_REGULATION_OF_TRANSLATION	POSITIVE_REGULATION_OF_TRANSLATION	1	1	320	34	0
POSITIVE_REGULATION_OF_TRANSPORT	POSITIVE_REGULATION_OF_TRANSPORT	1	1	320	23	0
POST_GOLGI_VESICLE_MEDIATED_TRANSPORT	POST_GOLGI_VESICLE_MEDIATED_TRANSPORT	1	1	320	14	0
POTASSIUM_CHANNEL_REGULATOR_ACTIVITY	POTASSIUM_CHANNEL_REGULATOR_ACTIVITY	1	1	320	13	0
PRIMARY_ACTIVE_TRANSMEMBRANE_TRANSPORTER_ACTIVITY	PRIMARY_ACTIVE_TRANSMEMBRANE_TRANSPORTER_ACTIVITY	1	1	320	40	0
PRODUCTION_OF_MOLECULAR_MEDIATOR_OF_IMMUNE_RESPONSE	PRODUCTION_OF_MOLECULAR_MEDIATOR_OF_IMMUNE_RESPONSE	1	1	320	13	0
PROTEASOME_COMPLEX	PROTEASOME_COMPLEX	1	1	320	21	0
PROTEIN_AMINO_ACID_ADP_RIBOSYLATION	PROTEIN_AMINO_ACID_ADP_RIBOSYLATION	1	1	320	10	0
PROTEIN_AMINO_ACID_AUTOPHOSPHORYLATION	PROTEIN_AMINO_ACID_AUTOPHOSPHORYLATION	1	1	320	30	0
PROTEIN_AMINO_ACID_LIPIDATION	PROTEIN_AMINO_ACID_LIPIDATION	1	1	320	24	0
PROTEIN_AMINO_ACID_O_LINKED_GLYCOSYLATION	PROTEIN_AMINO_ACID_O_LINKED_GLYCOSYLATION	1	1	320	18	0
PROTEIN_AUTOPROCESSING	PROTEIN_AUTOPROCESSING	1	1	320	31	0
PROTEIN_BINDING_BRIDGING	PROTEIN_BINDING_BRIDGING	0.288936	1	320	59	1	IRS4
PROTEIN_C_TERMINUS_BINDING	PROTEIN_C_TERMINUS_BINDING	1	1	320	70	0
PROTEIN_CATABOLIC_PROCESS	PROTEIN_CATABOLIC_PROCESS	1	1	320	65	0
PROTEIN_COMPLEX_ASSEMBLY	PROTEIN_COMPLEX_ASSEMBLY	0.60826	1	320	162	1	TGM3
PROTEIN_COMPLEX_DISASSEMBLY	PROTEIN_COMPLEX_DISASSEMBLY	1	1	320	12	0
PROTEIN_DEACETYLASE_ACTIVITY	PROTEIN_DEACETYLASE_ACTIVITY	1	1	320	10	0
PROTEIN_EXPORT_FROM_NUCLEUS	PROTEIN_EXPORT_FROM_NUCLEUS	1	1	320	12	0
PROTEIN_HETERODIMERIZATION_ACTIVITY	PROTEIN_HETERODIMERIZATION_ACTIVITY	0.35552	1	320	76	1	BCL2
PROTEIN_HOMOOLIGOMERIZATION	PROTEIN_HOMOOLIGOMERIZATION	1	1	320	21	0
PROTEIN_IMPORT	PROTEIN_IMPORT	1	1	320	61	0
PROTEIN_IMPORT_INTO_NUCLEUS	PROTEIN_IMPORT_INTO_NUCLEUS	1	1	320	47	0
PROTEIN_IMPORT_INTO_NUCLEUS_TRANSLOCATION	PROTEIN_IMPORT_INTO_NUCLEUS_TRANSLOCATION	1	1	320	11	0
PROTEIN_KINASE_BINDING	PROTEIN_KINASE_BINDING	0.301165	1	320	62	1	SPDYC
PROTEIN_KINASE_INHIBITOR_ACTIVITY	PROTEIN_KINASE_INHIBITOR_ACTIVITY	1	1	320	24	0
PROTEIN_MATURATION	PROTEIN_MATURATION	1	1	320	11	0
PROTEIN_METHYLTRANSFERASE_ACTIVITY	PROTEIN_METHYLTRANSFERASE_ACTIVITY	1	1	320	13	0
PROTEIN_MODIFICATION_BY_SMALL_PROTEIN_CONJUGATION	PROTEIN_MODIFICATION_BY_SMALL_PROTEIN_CONJUGATION	1	1	320	42	0
PROTEIN_N_TERMINUS_BINDING	PROTEIN_N_TERMINUS_BINDING	1	1	320	38	0
PROTEIN_PHOSPHATASE_BINDING	PROTEIN_PHOSPHATASE_BINDING	1	1	320	9	0
PROTEIN_PHOSPHATASE_TYPE_2A_REGULATOR_ACTIVITY	PROTEIN_PHOSPHATASE_TYPE_2A_REGULATOR_ACTIVITY	1	1	320	13	0
PROTEIN_POLYMERIZATION	PROTEIN_POLYMERIZATION	1	1	320	19	0
PROTEIN_POLYUBIQUITINATION	PROTEIN_POLYUBIQUITINATION	1	1	320	11	0
PROTEIN_PROCESSING	PROTEIN_PROCESSING	1	1	320	48	0
PROTEIN_RNA_COMPLEX_ASSEMBLY	PROTEIN_RNA_COMPLEX_ASSEMBLY	1	1	320	66	0
PROTEIN_SECRETION	PROTEIN_SECRETION	1	1	320	32	0
PROTEIN_SERINE_THREONINE_PHOSPHATASE_ACTIVITY	PROTEIN_SERINE_THREONINE_PHOSPHATASE_ACTIVITY	1	1	320	24	0
PROTEIN_SERINE_THREONINE_PHOSPHATASE_COMPLEX	PROTEIN_SERINE_THREONINE_PHOSPHATASE_COMPLEX	1	1	320	9	0
PROTEIN_SERINE_THREONINE_TYROSINE_KINASE_ACTIVITY	PROTEIN_SERINE_THREONINE_TYROSINE_KINASE_ACTIVITY	1	1	320	10	0
PROTEIN_STABILIZATION	PROTEIN_STABILIZATION	1	1	320	11	0
PROTEIN_TARGETING	PROTEIN_TARGETING	1	1	320	108	0
PROTEIN_TARGETING_TO_MEMBRANE	PROTEIN_TARGETING_TO_MEMBRANE	1	1	320	12	0
PROTEIN_TARGETING_TO_MITOCHONDRION	PROTEIN_TARGETING_TO_MITOCHONDRION	1	1	320	11	0
PROTEIN_TRANSPORT	PROTEIN_TRANSPORT	1	1	320	154	0
PROTEIN_TRANSPORTER_ACTIVITY	PROTEIN_TRANSPORTER_ACTIVITY	1	1	320	14	0
PROTEIN_UBIQUITINATION	PROTEIN_UBIQUITINATION	1	1	320	39	0
PROTEOLYSIS	PROTEOLYSIS	1	1	320	185	0
PROTON_TRANSPORTING_TWO_SECTOR_ATPASE_COMPLEX	PROTON_TRANSPORTING_TWO_SECTOR_ATPASE_COMPLEX	1	1	320	6	0
PURINE_NUCLEOTIDE_METABOLIC_PROCESS	PURINE_NUCLEOTIDE_METABOLIC_PROCESS	1	1	320	11	0
PURINE_RIBONUCLEOTIDE_METABOLIC_PROCESS	PURINE_RIBONUCLEOTIDE_METABOLIC_PROCESS	1	1	320	9	0
PYRIMIDINE_NUCLEOTIDE_METABOLIC_PROCESS	PYRIMIDINE_NUCLEOTIDE_METABOLIC_PROCESS	1	1	320	9	0
RAS_GTPASE_ACTIVATOR_ACTIVITY	RAS_GTPASE_ACTIVATOR_ACTIVITY	1	1	320	29	0
RAS_GTPASE_BINDING	RAS_GTPASE_BINDING	1	1	320	25	0
RAS_PROTEIN_SIGNAL_TRANSDUCTION	RAS_PROTEIN_SIGNAL_TRANSDUCTION	1	1	320	66	0
REACTOME_3_UTR_MEDIATED_TRANSLATIONAL_REGULATION	REACTOME_3_UTR_MEDIATED_TRANSLATIONAL_REGULATION	1	1	320	137	0
REACTOME_A_TETRASACCHARIDE_LINKER_SEQUENCE_IS_REQUIRED_FOR_GAG_SYNTHESIS	REACTOME_A_TETRASACCHARIDE_LINKER_SEQUENCE_IS_REQUIRED_FOR_GAG_SYNTHESIS	1	1	320	25	0
REACTOME_ABACAVIR_TRANSPORT_AND_METABOLISM	REACTOME_ABACAVIR_TRANSPORT_AND_METABOLISM	1	1	320	10	0
REACTOME_ABCA_TRANSPORTERS_IN_LIPID_HOMEOSTASIS	REACTOME_ABCA_TRANSPORTERS_IN_LIPID_HOMEOSTASIS	1	1	320	18	0
REACTOME_ABORTIVE_ELONGATION_OF_HIV1_TRANSCRIPT_IN_THE_ABSENCE_OF_TAT	REACTOME_ABORTIVE_ELONGATION_OF_HIV1_TRANSCRIPT_IN_THE_ABSENCE_OF_TAT	1	1	320	19	0
REACTOME_ACTIVATED_AMPK_STIMULATES_FATTY_ACID_OXIDATION_IN_MUSCLE	REACTOME_ACTIVATED_AMPK_STIMULATES_FATTY_ACID_OXIDATION_IN_MUSCLE	1	1	320	18	0
REACTOME_ACTIVATED_POINT_MUTANTS_OF_FGFR2	REACTOME_ACTIVATED_POINT_MUTANTS_OF_FGFR2	1	1	320	16	0
REACTOME_ACTIVATED_TAK1_MEDIATES_P38_MAPK_ACTIVATION	REACTOME_ACTIVATED_TAK1_MEDIATES_P38_MAPK_ACTIVATION	1	1	320	17	0
REACTOME_ACTIVATED_TLR4_SIGNALLING	REACTOME_ACTIVATED_TLR4_SIGNALLING	1	1	320	92	0
REACTOME_ACTIVATION_OF_ATR_IN_RESPONSE_TO_REPLICATION_STRESS	REACTOME_ACTIVATION_OF_ATR_IN_RESPONSE_TO_REPLICATION_STRESS	1	1	320	35	0
REACTOME_ACTIVATION_OF_CHAPERONE_GENES_BY_ATF6_ALPHA	REACTOME_ACTIVATION_OF_CHAPERONE_GENES_BY_ATF6_ALPHA	1	1	320	10	0
REACTOME_ACTIVATION_OF_CHAPERONE_GENES_BY_XBP1S	REACTOME_ACTIVATION_OF_CHAPERONE_GENES_BY_XBP1S	1	1	320	44	0
REACTOME_ACTIVATION_OF_CHAPERONES_BY_ATF6_ALPHA	REACTOME_ACTIVATION_OF_CHAPERONES_BY_ATF6_ALPHA	1	1	320	12	0
REACTOME_ACTIVATION_OF_GENES_BY_ATF4	REACTOME_ACTIVATION_OF_GENES_BY_ATF4	1	1	320	24	0
REACTOME_ACTIVATION_OF_IRF3_IRF7_MEDIATED_BY_TBK1_IKK_EPSILON	REACTOME_ACTIVATION_OF_IRF3_IRF7_MEDIATED_BY_TBK1_IKK_EPSILON	1	1	320	14	0
REACTOME_ACTIVATION_OF_KAINATE_RECEPTORS_UPON_GLUTAMATE_BINDING	REACTOME_ACTIVATION_OF_KAINATE_RECEPTORS_UPON_GLUTAMATE_BINDING	1	1	320	31	0
REACTOME_ACTIVATION_OF_NF_KAPPAB_IN_B_CELLS	REACTOME_ACTIVATION_OF_NF_KAPPAB_IN_B_CELLS	1	1	320	62	0
REACTOME_ACTIVATION_OF_THE_AP1_FAMILY_OF_TRANSCRIPTION_FACTORS	REACTOME_ACTIVATION_OF_THE_AP1_FAMILY_OF_TRANSCRIPTION_FACTORS	1	1	320	10	0
REACTOME_ACTIVATION_OF_THE_MRNA_UPON_BINDING_OF_THE_CAP_BINDING_COMPLEX_AND_EIFS_AND_SUBSEQUENT_BINDING_TO_43S	REACTOME_ACTIVATION_OF_THE_MRNA_UPON_BINDING_OF_THE_CAP_BINDING_COMPLEX_AND_EIFS_AND_SUBSEQUENT_BINDING_TO_43S	0.324998	1	320	68	1	EIF4EBP1
REACTOME_ACTIVATION_OF_THE_PRE_REPLICATIVE_COMPLEX	REACTOME_ACTIVATION_OF_THE_PRE_REPLICATIVE_COMPLEX	1	1	320	30	0
REACTOME_ACYL_CHAIN_REMODELLING_OF_PG	REACTOME_ACYL_CHAIN_REMODELLING_OF_PG	1	1	320	16	0
REACTOME_ACYL_CHAIN_REMODELLING_OF_PI	REACTOME_ACYL_CHAIN_REMODELLING_OF_PI	1	1	320	15	0
REACTOME_ADENYLATE_CYCLASE_ACTIVATING_PATHWAY	REACTOME_ADENYLATE_CYCLASE_ACTIVATING_PATHWAY	1	1	320	10	0
REACTOME_ADENYLATE_CYCLASE_INHIBITORY_PATHWAY	REACTOME_ADENYLATE_CYCLASE_INHIBITORY_PATHWAY	1	1	320	13	0
REACTOME_ADP_SIGNALLING_THROUGH_P2RY1	REACTOME_ADP_SIGNALLING_THROUGH_P2RY1	1	1	320	25	0
REACTOME_ADP_SIGNALLING_THROUGH_P2RY12	REACTOME_ADP_SIGNALLING_THROUGH_P2RY12	1	1	320	21	0
REACTOME_ADVANCED_GLYCOSYLATION_ENDPRODUCT_RECEPTOR_SIGNALING	REACTOME_ADVANCED_GLYCOSYLATION_ENDPRODUCT_RECEPTOR_SIGNALING	1	1	320	13	0
REACTOME_AKT_PHOSPHORYLATES_TARGETS_IN_THE_CYTOSOL	REACTOME_AKT_PHOSPHORYLATES_TARGETS_IN_THE_CYTOSOL	1	1	320	12	0
REACTOME_ALPHA_LINOLENIC_ACID_ALA_METABOLISM	REACTOME_ALPHA_LINOLENIC_ACID_ALA_METABOLISM	1	1	320	12	0
REACTOME_AMINO_ACID_SYNTHESIS_AND_INTERCONVERSION_TRANSAMINATION	REACTOME_AMINO_ACID_SYNTHESIS_AND_INTERCONVERSION_TRANSAMINATION	1	1	320	15	0
REACTOME_AMINO_ACID_TRANSPORT_ACROSS_THE_PLASMA_MEMBRANE	REACTOME_AMINO_ACID_TRANSPORT_ACROSS_THE_PLASMA_MEMBRANE	1	1	320	31	0
REACTOME_AMYLOIDS	REACTOME_AMYLOIDS	1	1	320	81	0
REACTOME_ANDROGEN_BIOSYNTHESIS	REACTOME_ANDROGEN_BIOSYNTHESIS	1	1	320	10	0
REACTOME_ANTIGEN_ACTIVATES_B_CELL_RECEPTOR_LEADING_TO_GENERATION_OF_SECOND_MESSENGERS	REACTOME_ANTIGEN_ACTIVATES_B_CELL_RECEPTOR_LEADING_TO_GENERATION_OF_SECOND_MESSENGERS	1	1	320	29	0
REACTOME_ANTIGEN_PRESENTATION_FOLDING_ASSEMBLY_AND_PEPTIDE_LOADING_OF_CLASS_I_MHC	REACTOME_ANTIGEN_PRESENTATION_FOLDING_ASSEMBLY_AND_PEPTIDE_LOADING_OF_CLASS_I_MHC	1	1	320	21	0
REACTOME_ANTIGEN_PROCESSING_CROSS_PRESENTATION	REACTOME_ANTIGEN_PROCESSING_CROSS_PRESENTATION	1	1	320	74	0
REACTOME_ANTIGEN_PROCESSING_UBIQUITINATION_PROTEASOME_DEGRADATION	REACTOME_ANTIGEN_PROCESSING_UBIQUITINATION_PROTEASOME_DEGRADATION	0.680177	1	320	197	1	RNF182
REACTOME_ANTIVIRAL_MECHANISM_BY_IFN_STIMULATED_GENES	REACTOME_ANTIVIRAL_MECHANISM_BY_IFN_STIMULATED_GENES	1	1	320	65	0
REACTOME_APC_C_CDC20_MEDIATED_DEGRADATION_OF_CYCLIN_B	REACTOME_APC_C_CDC20_MEDIATED_DEGRADATION_OF_CYCLIN_B	1	1	320	20	0
REACTOME_APC_C_CDC20_MEDIATED_DEGRADATION_OF_MITOTIC_PROTEINS	REACTOME_APC_C_CDC20_MEDIATED_DEGRADATION_OF_MITOTIC_PROTEINS	1	1	320	66	0
REACTOME_APC_C_CDH1_MEDIATED_DEGRADATION_OF_CDC20_AND_OTHER_APC_C_CDH1_TARGETED_PROTEINS_IN_LATE_MITOSIS_EARLY_G1	REACTOME_APC_C_CDH1_MEDIATED_DEGRADATION_OF_CDC20_AND_OTHER_APC_C_CDH1_TARGETED_PROTEINS_IN_LATE_MITOSIS_EARLY_G1	1	1	320	65	0
REACTOME_APC_CDC20_MEDIATED_DEGRADATION_OF_NEK2A	REACTOME_APC_CDC20_MEDIATED_DEGRADATION_OF_NEK2A	1	1	320	22	0
REACTOME_APOBEC3G_MEDIATED_RESISTANCE_TO_HIV1_INFECTION	REACTOME_APOBEC3G_MEDIATED_RESISTANCE_TO_HIV1_INFECTION	1	1	320	7	0
REACTOME_APOPTOSIS_INDUCED_DNA_FRAGMENTATION	REACTOME_APOPTOSIS_INDUCED_DNA_FRAGMENTATION	1	1	320	13	0
REACTOME_APOPTOTIC_CLEAVAGE_OF_CELL_ADHESION_PROTEINS	REACTOME_APOPTOTIC_CLEAVAGE_OF_CELL_ADHESION_PROTEINS	1	1	320	11	0
REACTOME_APOPTOTIC_CLEAVAGE_OF_CELLULAR_PROTEINS	REACTOME_APOPTOTIC_CLEAVAGE_OF_CELLULAR_PROTEINS	1	1	320	37	0
REACTOME_APOPTOTIC_EXECUTION_PHASE	REACTOME_APOPTOTIC_EXECUTION_PHASE	1	1	320	51	0
REACTOME_ARMS_MEDIATED_ACTIVATION	REACTOME_ARMS_MEDIATED_ACTIVATION	1	1	320	17	0
REACTOME_ASPARAGINE_N_LINKED_GLYCOSYLATION	REACTOME_ASPARAGINE_N_LINKED_GLYCOSYLATION	1	1	320	80	0
REACTOME_ASSEMBLY_OF_THE_PRE_REPLICATIVE_COMPLEX	REACTOME_ASSEMBLY_OF_THE_PRE_REPLICATIVE_COMPLEX	1	1	320	64	0
REACTOME_ASSOCIATION_OF_LICENSING_FACTORS_WITH_THE_PRE_REPLICATIVE_COMPLEX	REACTOME_ASSOCIATION_OF_LICENSING_FACTORS_WITH_THE_PRE_REPLICATIVE_COMPLEX	1	1	320	14	0
REACTOME_ASSOCIATION_OF_TRIC_CCT_WITH_TARGET_PROTEINS_DURING_BIOSYNTHESIS	REACTOME_ASSOCIATION_OF_TRIC_CCT_WITH_TARGET_PROTEINS_DURING_BIOSYNTHESIS	1	1	320	26	0
REACTOME_AUTODEGRADATION_OF_CDH1_BY_CDH1_APC_C	REACTOME_AUTODEGRADATION_OF_CDH1_BY_CDH1_APC_C	1	1	320	57	0
REACTOME_AUTODEGRADATION_OF_THE_E3_UBIQUITIN_LIGASE_COP1	REACTOME_AUTODEGRADATION_OF_THE_E3_UBIQUITIN_LIGASE_COP1	1	1	320	48	0
REACTOME_BASE_EXCISION_REPAIR	REACTOME_BASE_EXCISION_REPAIR	1	1	320	19	0
REACTOME_BASE_FREE_SUGAR_PHOSPHATE_REMOVAL_VIA_THE_SINGLE_NUCLEOTIDE_REPLACEMENT_PATHWAY	REACTOME_BASE_FREE_SUGAR_PHOSPHATE_REMOVAL_VIA_THE_SINGLE_NUCLEOTIDE_REPLACEMENT_PATHWAY	1	1	320	10	0
REACTOME_BASIGIN_INTERACTIONS	REACTOME_BASIGIN_INTERACTIONS	1	1	320	26	0
REACTOME_BILE_ACID_AND_BILE_SALT_METABOLISM	REACTOME_BILE_ACID_AND_BILE_SALT_METABOLISM	1	1	320	27	0
REACTOME_BILE_SALT_AND_ORGANIC_ANION_SLC_TRANSPORTERS	REACTOME_BILE_SALT_AND_ORGANIC_ANION_SLC_TRANSPORTERS	1	1	320	11	0
REACTOME_BINDING_AND_ENTRY_OF_HIV_VIRION	REACTOME_BINDING_AND_ENTRY_OF_HIV_VIRION	1	1	320	6	0
REACTOME_BIOSYNTHESIS_OF_THE_N_GLYCAN_PRECURSOR_DOLICHOL_LIPID_LINKED_OLIGOSACCHARIDE_LLO_AND_TRANSFER_TO_A_NASCENT_PROTEIN	REACTOME_BIOSYNTHESIS_OF_THE_N_GLYCAN_PRECURSOR_DOLICHOL_LIPID_LINKED_OLIGOSACCHARIDE_LLO_AND_TRANSFER_TO_A_NASCENT_PROTEIN	1	1	320	28	0
REACTOME_BRANCHED_CHAIN_AMINO_ACID_CATABOLISM	REACTOME_BRANCHED_CHAIN_AMINO_ACID_CATABOLISM	1	1	320	17	0
REACTOME_CALNEXIN_CALRETICULIN_CYCLE	REACTOME_CALNEXIN_CALRETICULIN_CYCLE	1	1	320	11	0
REACTOME_CASPASE_MEDIATED_CLEAVAGE_OF_CYTOSKELETAL_PROTEINS	REACTOME_CASPASE_MEDIATED_CLEAVAGE_OF_CYTOSKELETAL_PROTEINS	1	1	320	12	0
REACTOME_CD28_CO_STIMULATION	REACTOME_CD28_CO_STIMULATION	1	1	320	31	0
REACTOME_CD28_DEPENDENT_PI3K_AKT_SIGNALING	REACTOME_CD28_DEPENDENT_PI3K_AKT_SIGNALING	1	1	320	21	0
REACTOME_CD28_DEPENDENT_VAV1_PATHWAY	REACTOME_CD28_DEPENDENT_VAV1_PATHWAY	1	1	320	11	0
REACTOME_CDC6_ASSOCIATION_WITH_THE_ORC_ORIGIN_COMPLEX	REACTOME_CDC6_ASSOCIATION_WITH_THE_ORC_ORIGIN_COMPLEX	1	1	320	11	0
REACTOME_CDK_MEDIATED_PHOSPHORYLATION_AND_REMOVAL_OF_CDC6	REACTOME_CDK_MEDIATED_PHOSPHORYLATION_AND_REMOVAL_OF_CDC6	1	1	320	47	0
REACTOME_CDT1_ASSOCIATION_WITH_THE_CDC6_ORC_ORIGIN_COMPLEX	REACTOME_CDT1_ASSOCIATION_WITH_THE_CDC6_ORC_ORIGIN_COMPLEX	1	1	320	55	0
REACTOME_CELL_CYCLE_CHECKPOINTS	REACTOME_CELL_CYCLE_CHECKPOINTS	1	1	320	112	0
REACTOME_CELL_DEATH_SIGNALLING_VIA_NRAGE_NRIF_AND_NADE	REACTOME_CELL_DEATH_SIGNALLING_VIA_NRAGE_NRIF_AND_NADE	1	1	320	58	0
REACTOME_CELL_SURFACE_INTERACTIONS_AT_THE_VASCULAR_WALL	REACTOME_CELL_SURFACE_INTERACTIONS_AT_THE_VASCULAR_WALL	1	1	320	85	0
REACTOME_CHOLESTEROL_BIOSYNTHESIS	REACTOME_CHOLESTEROL_BIOSYNTHESIS	1	1	320	21	0
REACTOME_CHONDROITIN_SULFATE_BIOSYNTHESIS	REACTOME_CHONDROITIN_SULFATE_BIOSYNTHESIS	1	1	320	19	0
REACTOME_CHONDROITIN_SULFATE_DERMATAN_SULFATE_METABOLISM	REACTOME_CHONDROITIN_SULFATE_DERMATAN_SULFATE_METABOLISM	1	1	320	47	0
REACTOME_CHROMOSOME_MAINTENANCE	REACTOME_CHROMOSOME_MAINTENANCE	0.491637	1	320	117	1	RSF1
REACTOME_CHYLOMICRON_MEDIATED_LIPID_TRANSPORT	REACTOME_CHYLOMICRON_MEDIATED_LIPID_TRANSPORT	1	1	320	16	0
REACTOME_CITRIC_ACID_CYCLE_TCA_CYCLE	REACTOME_CITRIC_ACID_CYCLE_TCA_CYCLE	1	1	320	20	0
REACTOME_CLASS_B_2_SECRETIN_FAMILY_RECEPTORS	REACTOME_CLASS_B_2_SECRETIN_FAMILY_RECEPTORS	0.381096	1	320	83	1	WNT11
REACTOME_CLASS_C_3_METABOTROPIC_GLUTAMATE_PHEROMONE_RECEPTORS	REACTOME_CLASS_C_3_METABOTROPIC_GLUTAMATE_PHEROMONE_RECEPTORS	1	1	320	14	0
REACTOME_CLEAVAGE_OF_GROWING_TRANSCRIPT_IN_THE_TERMINATION_REGION_	REACTOME_CLEAVAGE_OF_GROWING_TRANSCRIPT_IN_THE_TERMINATION_REGION_	1	1	320	42	0
REACTOME_COLLAGEN_FORMATION	REACTOME_COLLAGEN_FORMATION	1	1	320	54	0
REACTOME_COMMON_PATHWAY	REACTOME_COMMON_PATHWAY	1	1	320	14	0
REACTOME_COMPLEMENT_CASCADE	REACTOME_COMPLEMENT_CASCADE	1	1	320	29	0
REACTOME_CONVERSION_FROM_APC_C_CDC20_TO_APC_C_CDH1_IN_LATE_ANAPHASE	REACTOME_CONVERSION_FROM_APC_C_CDC20_TO_APC_C_CDH1_IN_LATE_ANAPHASE	1	1	320	16	0
REACTOME_COPI_MEDIATED_TRANSPORT	REACTOME_COPI_MEDIATED_TRANSPORT	1	1	320	9	0
REACTOME_COSTIMULATION_BY_THE_CD28_FAMILY	REACTOME_COSTIMULATION_BY_THE_CD28_FAMILY	0.297112	1	320	61	1	HLA-DQA2
REACTOME_CREATION_OF_C4_AND_C2_ACTIVATORS	REACTOME_CREATION_OF_C4_AND_C2_ACTIVATORS	1	1	320	8	0
REACTOME_CREB_PHOSPHORYLATION_THROUGH_THE_ACTIVATION_OF_CAMKII	REACTOME_CREB_PHOSPHORYLATION_THROUGH_THE_ACTIVATION_OF_CAMKII	1	1	320	15	0
REACTOME_CROSS_PRESENTATION_OF_SOLUBLE_EXOGENOUS_ANTIGENS_ENDOSOMES	REACTOME_CROSS_PRESENTATION_OF_SOLUBLE_EXOGENOUS_ANTIGENS_ENDOSOMES	1	1	320	47	0
REACTOME_CS_DS_DEGRADATION	REACTOME_CS_DS_DEGRADATION	1	1	320	12	0
REACTOME_CTLA4_INHIBITORY_SIGNALING	REACTOME_CTLA4_INHIBITORY_SIGNALING	1	1	320	21	0
REACTOME_CTNNB1_PHOSPHORYLATION_CASCADE	REACTOME_CTNNB1_PHOSPHORYLATION_CASCADE	1	1	320	15	0
REACTOME_CYCLIN_A_B1_ASSOCIATED_EVENTS_DURING_G2_M_TRANSITION	REACTOME_CYCLIN_A_B1_ASSOCIATED_EVENTS_DURING_G2_M_TRANSITION	1	1	320	15	0
REACTOME_CYCLIN_E_ASSOCIATED_EVENTS_DURING_G1_S_TRANSITION_	REACTOME_CYCLIN_E_ASSOCIATED_EVENTS_DURING_G1_S_TRANSITION_	1	1	320	63	0
REACTOME_CYTOSOLIC_TRNA_AMINOACYLATION	REACTOME_CYTOSOLIC_TRNA_AMINOACYLATION	1	1	320	24	0
REACTOME_DEADENYLATION_OF_MRNA	REACTOME_DEADENYLATION_OF_MRNA	1	1	320	17	0
REACTOME_DEGRADATION_OF_THE_EXTRACELLULAR_MATRIX	REACTOME_DEGRADATION_OF_THE_EXTRACELLULAR_MATRIX	1	1	320	29	0
REACTOME_DEPOSITION_OF_NEW_CENPA_CONTAINING_NUCLEOSOMES_AT_THE_CENTROMERE	REACTOME_DEPOSITION_OF_NEW_CENPA_CONTAINING_NUCLEOSOMES_AT_THE_CENTROMERE	0.297112	1	320	61	1	RSF1
REACTOME_DESTABILIZATION_OF_MRNA_BY_AUF1_HNRNP_D0	REACTOME_DESTABILIZATION_OF_MRNA_BY_AUF1_HNRNP_D0	1	1	320	51	0
REACTOME_DESTABILIZATION_OF_MRNA_BY_BRF1	REACTOME_DESTABILIZATION_OF_MRNA_BY_BRF1	1	1	320	17	0
REACTOME_DESTABILIZATION_OF_MRNA_BY_KSRP	REACTOME_DESTABILIZATION_OF_MRNA_BY_KSRP	1	1	320	17	0
REACTOME_DESTABILIZATION_OF_MRNA_BY_TRISTETRAPROLIN_TTP	REACTOME_DESTABILIZATION_OF_MRNA_BY_TRISTETRAPROLIN_TTP	1	1	320	17	0
REACTOME_DIABETES_PATHWAYS	REACTOME_DIABETES_PATHWAYS	0.517446	1	320	126	1	SNAP25
REACTOME_DIGESTION_OF_DIETARY_CARBOHYDRATE	REACTOME_DIGESTION_OF_DIETARY_CARBOHYDRATE	1	1	320	9	0
REACTOME_DNA_REPAIR	REACTOME_DNA_REPAIR	1	1	320	103	0
REACTOME_DNA_REPLICATION	REACTOME_DNA_REPLICATION	1	1	320	182	0
REACTOME_DNA_STRAND_ELONGATION	REACTOME_DNA_STRAND_ELONGATION	1	1	320	30	0
REACTOME_DOUBLE_STRAND_BREAK_REPAIR	REACTOME_DOUBLE_STRAND_BREAK_REPAIR	1	1	320	21	0
REACTOME_DOWNREGULATION_OF_ERBB2_ERBB3_SIGNALING	REACTOME_DOWNREGULATION_OF_ERBB2_ERBB3_SIGNALING	1	1	320	12	0
REACTOME_DOWNREGULATION_OF_SMAD2_3_SMAD4_TRANSCRIPTIONAL_ACTIVITY	REACTOME_DOWNREGULATION_OF_SMAD2_3_SMAD4_TRANSCRIPTIONAL_ACTIVITY	1	1	320	20	0
REACTOME_DOWNREGULATION_OF_TGF_BETA_RECEPTOR_SIGNALING	REACTOME_DOWNREGULATION_OF_TGF_BETA_RECEPTOR_SIGNALING	1	1	320	22	0
REACTOME_DOWNSTREAM_SIGNAL_TRANSDUCTION	REACTOME_DOWNSTREAM_SIGNAL_TRANSDUCTION	0.40566	1	320	90	1	PRKAR2B
REACTOME_DOWNSTREAM_SIGNALING_EVENTS_OF_B_CELL_RECEPTOR_BCR	REACTOME_DOWNSTREAM_SIGNALING_EVENTS_OF_B_CELL_RECEPTOR_BCR	1	1	320	93	0
REACTOME_DSCAM_INTERACTIONS	REACTOME_DSCAM_INTERACTIONS	1	1	320	11	0
REACTOME_E2F_ENABLED_INHIBITION_OF_PRE_REPLICATION_COMPLEX_FORMATION	REACTOME_E2F_ENABLED_INHIBITION_OF_PRE_REPLICATION_COMPLEX_FORMATION	1	1	320	10	0
REACTOME_E2F_MEDIATED_REGULATION_OF_DNA_REPLICATION	REACTOME_E2F_MEDIATED_REGULATION_OF_DNA_REPLICATION	1	1	320	34	0
REACTOME_EARLY_PHASE_OF_HIV_LIFE_CYCLE	REACTOME_EARLY_PHASE_OF_HIV_LIFE_CYCLE	1	1	320	15	0
REACTOME_EFFECTS_OF_PIP2_HYDROLYSIS	REACTOME_EFFECTS_OF_PIP2_HYDROLYSIS	1	1	320	23	0
REACTOME_EGFR_DOWNREGULATION	REACTOME_EGFR_DOWNREGULATION	1	1	320	25	0
REACTOME_EICOSANOID_LIGAND_BINDING_RECEPTORS	REACTOME_EICOSANOID_LIGAND_BINDING_RECEPTORS	1	1	320	14	0
REACTOME_ELEVATION_OF_CYTOSOLIC_CA2_LEVELS	REACTOME_ELEVATION_OF_CYTOSOLIC_CA2_LEVELS	1	1	320	8	0
REACTOME_ELONGATION_ARREST_AND_RECOVERY	REACTOME_ELONGATION_ARREST_AND_RECOVERY	1	1	320	24	0
REACTOME_ENDOGENOUS_STEROLS	REACTOME_ENDOGENOUS_STEROLS	1	1	320	15	0
REACTOME_ENDOSOMAL_SORTING_COMPLEX_REQUIRED_FOR_TRANSPORT_ESCRT	REACTOME_ENDOSOMAL_SORTING_COMPLEX_REQUIRED_FOR_TRANSPORT_ESCRT	1	1	320	27	0
REACTOME_ENDOSOMAL_VACUOLAR_PATHWAY	REACTOME_ENDOSOMAL_VACUOLAR_PATHWAY	1	1	320	9	0
REACTOME_ENERGY_DEPENDENT_REGULATION_OF_MTOR_BY_LKB1_AMPK	REACTOME_ENERGY_DEPENDENT_REGULATION_OF_MTOR_BY_LKB1_AMPK	1	1	320	17	0
REACTOME_ENOS_ACTIVATION_AND_REGULATION	REACTOME_ENOS_ACTIVATION_AND_REGULATION	1	1	320	20	0
REACTOME_ER_PHAGOSOME_PATHWAY	REACTOME_ER_PHAGOSOME_PATHWAY	1	1	320	60	0
REACTOME_ERK_MAPK_TARGETS	REACTOME_ERK_MAPK_TARGETS	1	1	320	21	0
REACTOME_ERKS_ARE_INACTIVATED	REACTOME_ERKS_ARE_INACTIVATED	1	1	320	12	0
REACTOME_ETHANOL_OXIDATION	REACTOME_ETHANOL_OXIDATION	1	1	320	10	0
REACTOME_EXTENSION_OF_TELOMERES	REACTOME_EXTENSION_OF_TELOMERES	1	1	320	27	0
REACTOME_EXTRACELLULAR_MATRIX_ORGANIZATION	REACTOME_EXTRACELLULAR_MATRIX_ORGANIZATION	1	1	320	83	0
REACTOME_EXTRINSIC_PATHWAY_FOR_APOPTOSIS	REACTOME_EXTRINSIC_PATHWAY_FOR_APOPTOSIS	1	1	320	13	0
REACTOME_FACILITATIVE_NA_INDEPENDENT_GLUCOSE_TRANSPORTERS	REACTOME_FACILITATIVE_NA_INDEPENDENT_GLUCOSE_TRANSPORTERS	1	1	320	12	0
REACTOME_FANCONI_ANEMIA_PATHWAY	REACTOME_FANCONI_ANEMIA_PATHWAY	1	1	320	20	0
REACTOME_FATTY_ACYL_COA_BIOSYNTHESIS	REACTOME_FATTY_ACYL_COA_BIOSYNTHESIS	1	1	320	18	0
REACTOME_FGFR2C_LIGAND_BINDING_AND_ACTIVATION	REACTOME_FGFR2C_LIGAND_BINDING_AND_ACTIVATION	1	1	320	12	0
REACTOME_FORMATION_OF_FIBRIN_CLOT_CLOTTING_CASCADE	REACTOME_FORMATION_OF_FIBRIN_CLOT_CLOTTING_CASCADE	1	1	320	32	0
REACTOME_FORMATION_OF_INCISION_COMPLEX_IN_GG_NER	REACTOME_FORMATION_OF_INCISION_COMPLEX_IN_GG_NER	1	1	320	21	0
REACTOME_FORMATION_OF_RNA_POL_II_ELONGATION_COMPLEX_	REACTOME_FORMATION_OF_RNA_POL_II_ELONGATION_COMPLEX_	1	1	320	36	0
REACTOME_FORMATION_OF_THE_HIV1_EARLY_ELONGATION_COMPLEX	REACTOME_FORMATION_OF_THE_HIV1_EARLY_ELONGATION_COMPLEX	1	1	320	29	0
REACTOME_FORMATION_OF_THE_TERNARY_COMPLEX_AND_SUBSEQUENTLY_THE_43S_COMPLEX	REACTOME_FORMATION_OF_THE_TERNARY_COMPLEX_AND_SUBSEQUENTLY_THE_43S_COMPLEX	1	1	320	60	0
REACTOME_FORMATION_OF_TRANSCRIPTION_COUPLED_NER_TC_NER_REPAIR_COMPLEX	REACTOME_FORMATION_OF_TRANSCRIPTION_COUPLED_NER_TC_NER_REPAIR_COMPLEX	1	1	320	29	0
REACTOME_FORMATION_OF_TUBULIN_FOLDING_INTERMEDIATES_BY_CCT_TRIC	REACTOME_FORMATION_OF_TUBULIN_FOLDING_INTERMEDIATES_BY_CCT_TRIC	1	1	320	21	0
REACTOME_G0_AND_EARLY_G1	REACTOME_G0_AND_EARLY_G1	1	1	320	24	0
REACTOME_G1_PHASE	REACTOME_G1_PHASE	1	1	320	36	0
REACTOME_G1_S_SPECIFIC_TRANSCRIPTION	REACTOME_G1_S_SPECIFIC_TRANSCRIPTION	1	1	320	18	0
REACTOME_G1_S_TRANSITION	REACTOME_G1_S_TRANSITION	1	1	320	108	0
REACTOME_G2_M_CHECKPOINTS	REACTOME_G2_M_CHECKPOINTS	1	1	320	41	0
REACTOME_G2_M_DNA_DAMAGE_CHECKPOINT	REACTOME_G2_M_DNA_DAMAGE_CHECKPOINT	1	1	320	9	0
REACTOME_G_ALPHA1213_SIGNALLING_EVENTS	REACTOME_G_ALPHA1213_SIGNALLING_EVENTS	1	1	320	74	0
REACTOME_G_ALPHA_Q_SIGNALLING_EVENTS	REACTOME_G_ALPHA_Q_SIGNALLING_EVENTS	0.642944	1	320	178	1	FFAR2
REACTOME_G_ALPHA_Z_SIGNALLING_EVENTS	REACTOME_G_ALPHA_Z_SIGNALLING_EVENTS	1	1	320	44	0
REACTOME_G_BETA_GAMMA_SIGNALLING_THROUGH_PI3KGAMMA	REACTOME_G_BETA_GAMMA_SIGNALLING_THROUGH_PI3KGAMMA	1	1	320	25	0
REACTOME_G_BETA_GAMMA_SIGNALLING_THROUGH_PLC_BETA	REACTOME_G_BETA_GAMMA_SIGNALLING_THROUGH_PLC_BETA	1	1	320	20	0
REACTOME_G_PROTEIN_ACTIVATION	REACTOME_G_PROTEIN_ACTIVATION	1	1	320	27	0
REACTOME_G_PROTEIN_BETA_GAMMA_SIGNALLING	REACTOME_G_PROTEIN_BETA_GAMMA_SIGNALLING	1	1	320	28	0
REACTOME_GAB1_SIGNALOSOME	REACTOME_GAB1_SIGNALOSOME	1	1	320	36	0
REACTOME_GABA_B_RECEPTOR_ACTIVATION	REACTOME_GABA_B_RECEPTOR_ACTIVATION	1	1	320	38	0
REACTOME_GAMMA_CARBOXYLATION_TRANSPORT_AND_AMINO_TERMINAL_CLEAVAGE_OF_PROTEINS	REACTOME_GAMMA_CARBOXYLATION_TRANSPORT_AND_AMINO_TERMINAL_CLEAVAGE_OF_PROTEINS	1	1	320	10	0
REACTOME_GAP_JUNCTION_ASSEMBLY	REACTOME_GAP_JUNCTION_ASSEMBLY	1	1	320	18	0
REACTOME_GAP_JUNCTION_DEGRADATION	REACTOME_GAP_JUNCTION_DEGRADATION	1	1	320	10	0
REACTOME_GAP_JUNCTION_TRAFFICKING	REACTOME_GAP_JUNCTION_TRAFFICKING	1	1	320	27	0
REACTOME_GASTRIN_CREB_SIGNALLING_PATHWAY_VIA_PKC_AND_MAPK	REACTOME_GASTRIN_CREB_SIGNALLING_PATHWAY_VIA_PKC_AND_MAPK	0.683864	1	320	199	1	FFAR2
REACTOME_GLOBAL_GENOMIC_NER_GG_NER	REACTOME_GLOBAL_GENOMIC_NER_GG_NER	1	1	320	33	0
REACTOME_GLUCAGON_TYPE_LIGAND_RECEPTORS	REACTOME_GLUCAGON_TYPE_LIGAND_RECEPTORS	1	1	320	33	0
REACTOME_GLUCONEOGENESIS	REACTOME_GLUCONEOGENESIS	1	1	320	32	0
REACTOME_GLUCOSE_METABOLISM	REACTOME_GLUCOSE_METABOLISM	1	1	320	65	0
REACTOME_GLUCOSE_TRANSPORT	REACTOME_GLUCOSE_TRANSPORT	1	1	320	37	0
REACTOME_GLYCOGEN_BREAKDOWN_GLYCOGENOLYSIS	REACTOME_GLYCOGEN_BREAKDOWN_GLYCOGENOLYSIS	1	1	320	17	0
REACTOME_GLYCOLYSIS	REACTOME_GLYCOLYSIS	1	1	320	27	0
REACTOME_GLYCOPROTEIN_HORMONES	REACTOME_GLYCOPROTEIN_HORMONES	1	1	320	11	0
REACTOME_GLYCOSAMINOGLYCAN_METABOLISM	REACTOME_GLYCOSAMINOGLYCAN_METABOLISM	1	1	320	108	0
REACTOME_GOLGI_ASSOCIATED_VESICLE_BIOGENESIS	REACTOME_GOLGI_ASSOCIATED_VESICLE_BIOGENESIS	1	1	320	50	0
REACTOME_GPVI_MEDIATED_ACTIVATION_CASCADE	REACTOME_GPVI_MEDIATED_ACTIVATION_CASCADE	1	1	320	31	0
REACTOME_GRB2_EVENTS_IN_ERBB2_SIGNALING	REACTOME_GRB2_EVENTS_IN_ERBB2_SIGNALING	1	1	320	22	0
REACTOME_GRB2_SOS_PROVIDES_LINKAGE_TO_MAPK_SIGNALING_FOR_INTERGRINS_	REACTOME_GRB2_SOS_PROVIDES_LINKAGE_TO_MAPK_SIGNALING_FOR_INTERGRINS_	1	1	320	15	0
REACTOME_GROWTH_HORMONE_RECEPTOR_SIGNALING	REACTOME_GROWTH_HORMONE_RECEPTOR_SIGNALING	1	1	320	24	0
REACTOME_HDL_MEDIATED_LIPID_TRANSPORT	REACTOME_HDL_MEDIATED_LIPID_TRANSPORT	1	1	320	15	0
REACTOME_HEPARAN_SULFATE_HEPARIN_HS_GAG_METABOLISM	REACTOME_HEPARAN_SULFATE_HEPARIN_HS_GAG_METABOLISM	1	1	320	52	0
REACTOME_HIV_INFECTION	REACTOME_HIV_INFECTION	0.664997	1	320	189	1	DOCK2
REACTOME_HIV_LIFE_CYCLE	REACTOME_HIV_LIFE_CYCLE	1	1	320	109	0
REACTOME_HOMOLOGOUS_RECOMBINATION_REPAIR_OF_REPLICATION_INDEPENDENT_DOUBLE_STRAND_BREAKS	REACTOME_HOMOLOGOUS_RECOMBINATION_REPAIR_OF_REPLICATION_INDEPENDENT_DOUBLE_STRAND_BREAKS	1	1	320	15	0
REACTOME_HORMONE_LIGAND_BINDING_RECEPTORS	REACTOME_HORMONE_LIGAND_BINDING_RECEPTORS	1	1	320	10	0
REACTOME_HORMONE_SENSITIVE_LIPASE_HSL_MEDIATED_TRIACYLGLYCEROL_HYDROLYSIS	REACTOME_HORMONE_SENSITIVE_LIPASE_HSL_MEDIATED_TRIACYLGLYCEROL_HYDROLYSIS	1	1	320	12	0
REACTOME_HOST_INTERACTIONS_OF_HIV_FACTORS	REACTOME_HOST_INTERACTIONS_OF_HIV_FACTORS	0.503273	1	320	121	1	DOCK2
REACTOME_HS_GAG_BIOSYNTHESIS	REACTOME_HS_GAG_BIOSYNTHESIS	1	1	320	31	0
REACTOME_HS_GAG_DEGRADATION	REACTOME_HS_GAG_DEGRADATION	1	1	320	20	0
REACTOME_HYALURONAN_METABOLISM	REACTOME_HYALURONAN_METABOLISM	1	1	320	14	0
REACTOME_HYALURONAN_UPTAKE_AND_DEGRADATION	REACTOME_HYALURONAN_UPTAKE_AND_DEGRADATION	1	1	320	10	0
REACTOME_IKK_COMPLEX_RECRUITMENT_MEDIATED_BY_RIP1	REACTOME_IKK_COMPLEX_RECRUITMENT_MEDIATED_BY_RIP1	1	1	320	10	0
REACTOME_IL_2_SIGNALING	REACTOME_IL_2_SIGNALING	1	1	320	41	0
REACTOME_IL_3_5_AND_GM_CSF_SIGNALING	REACTOME_IL_3_5_AND_GM_CSF_SIGNALING	1	1	320	43	0
REACTOME_IL_6_SIGNALING	REACTOME_IL_6_SIGNALING	1	1	320	10	0
REACTOME_IL_7_SIGNALING	REACTOME_IL_7_SIGNALING	1	1	320	11	0
REACTOME_IL_RECEPTOR_SHC_SIGNALING	REACTOME_IL_RECEPTOR_SHC_SIGNALING	1	1	320	27	0
REACTOME_IMMUNOREGULATORY_INTERACTIONS_BETWEEN_A_LYMPHOID_AND_A_NON_LYMPHOID_CELL	REACTOME_IMMUNOREGULATORY_INTERACTIONS_BETWEEN_A_LYMPHOID_AND_A_NON_LYMPHOID_CELL	1	1	320	60	0
REACTOME_INCRETIN_SYNTHESIS_SECRETION_AND_INACTIVATION	REACTOME_INCRETIN_SYNTHESIS_SECRETION_AND_INACTIVATION	1	1	320	20	0
REACTOME_INFLUENZA_LIFE_CYCLE	REACTOME_INFLUENZA_LIFE_CYCLE	1	1	320	165	0
REACTOME_INFLUENZA_VIRAL_RNA_TRANSCRIPTION_AND_REPLICATION	REACTOME_INFLUENZA_VIRAL_RNA_TRANSCRIPTION_AND_REPLICATION	1	1	320	132	0
REACTOME_INHIBITION_OF_INSULIN_SECRETION_BY_ADRENALINE_NORADRENALINE	REACTOME_INHIBITION_OF_INSULIN_SECRETION_BY_ADRENALINE_NORADRENALINE	1	1	320	25	0
REACTOME_INHIBITION_OF_REPLICATION_INITIATION_OF_DAMAGED_DNA_BY_RB1_E2F1	REACTOME_INHIBITION_OF_REPLICATION_INITIATION_OF_DAMAGED_DNA_BY_RB1_E2F1	1	1	320	12	0
REACTOME_INHIBITION_OF_THE_PROTEOLYTIC_ACTIVITY_OF_APC_C_REQUIRED_FOR_THE_ONSET_OF_ANAPHASE_BY_MITOTIC_SPINDLE_CHECKPOINT_COMPONENTS	REACTOME_INHIBITION_OF_THE_PROTEOLYTIC_ACTIVITY_OF_APC_C_REQUIRED_FOR_THE_ONSET_OF_ANAPHASE_BY_MITOTIC_SPINDLE_CHECKPOINT_COMPONENTS	1	1	320	18	0
REACTOME_INHIBITION_OF_VOLTAGE_GATED_CA2_CHANNELS_VIA_GBETA_GAMMA_SUBUNITS	REACTOME_INHIBITION_OF_VOLTAGE_GATED_CA2_CHANNELS_VIA_GBETA_GAMMA_SUBUNITS	1	1	320	25	0
REACTOME_INITIAL_TRIGGERING_OF_COMPLEMENT	REACTOME_INITIAL_TRIGGERING_OF_COMPLEMENT	1	1	320	13	0
REACTOME_INSULIN_RECEPTOR_RECYCLING	REACTOME_INSULIN_RECEPTOR_RECYCLING	1	1	320	23	0
REACTOME_INTEGRATION_OF_PROVIRUS	REACTOME_INTEGRATION_OF_PROVIRUS	1	1	320	10	0
REACTOME_INTEGRIN_ALPHAIIB_BETA3_SIGNALING	REACTOME_INTEGRIN_ALPHAIIB_BETA3_SIGNALING	1	1	320	27	0
REACTOME_INTEGRIN_CELL_SURFACE_INTERACTIONS	REACTOME_INTEGRIN_CELL_SURFACE_INTERACTIONS	1	1	320	78	0
REACTOME_INTERACTIONS_OF_VPR_WITH_HOST_CELLULAR_PROTEINS	REACTOME_INTERACTIONS_OF_VPR_WITH_HOST_CELLULAR_PROTEINS	1	1	320	31	0
REACTOME_INTERFERON_ALPHA_BETA_SIGNALING	REACTOME_INTERFERON_ALPHA_BETA_SIGNALING	1	1	320	63	0
REACTOME_INTERFERON_GAMMA_SIGNALING	REACTOME_INTERFERON_GAMMA_SIGNALING	0.293036	1	320	60	1	HLA-DQA2
REACTOME_INTERFERON_SIGNALING	REACTOME_INTERFERON_SIGNALING	0.589678	1	320	154	1	HLA-DQA2
REACTOME_INTRINSIC_PATHWAY	REACTOME_INTRINSIC_PATHWAY	1	1	320	17	0
REACTOME_IONOTROPIC_ACTIVITY_OF_KAINATE_RECEPTORS	REACTOME_IONOTROPIC_ACTIVITY_OF_KAINATE_RECEPTORS	1	1	320	11	0
REACTOME_IRAK1_RECRUITS_IKK_COMPLEX	REACTOME_IRAK1_RECRUITS_IKK_COMPLEX	1	1	320	10	0
REACTOME_IRAK2_MEDIATED_ACTIVATION_OF_TAK1_COMPLEX_UPON_TLR7_8_OR_9_STIMULATION	REACTOME_IRAK2_MEDIATED_ACTIVATION_OF_TAK1_COMPLEX_UPON_TLR7_8_OR_9_STIMULATION	1	1	320	9	0
REACTOME_JNK_C_JUN_KINASES_PHOSPHORYLATION_AND_ACTIVATION_MEDIATED_BY_ACTIVATED_HUMAN_TAK1	REACTOME_JNK_C_JUN_KINASES_PHOSPHORYLATION_AND_ACTIVATION_MEDIATED_BY_ACTIVATED_HUMAN_TAK1	1	1	320	16	0
REACTOME_KERATAN_SULFATE_BIOSYNTHESIS	REACTOME_KERATAN_SULFATE_BIOSYNTHESIS	1	1	320	25	0
REACTOME_KERATAN_SULFATE_DEGRADATION	REACTOME_KERATAN_SULFATE_DEGRADATION	1	1	320	11	0
REACTOME_KERATAN_SULFATE_KERATIN_METABOLISM	REACTOME_KERATAN_SULFATE_KERATIN_METABOLISM	1	1	320	29	0
REACTOME_KINESINS	REACTOME_KINESINS	1	1	320	24	0
REACTOME_LAGGING_STRAND_SYNTHESIS	REACTOME_LAGGING_STRAND_SYNTHESIS	1	1	320	19	0
REACTOME_LATE_PHASE_OF_HIV_LIFE_CYCLE	REACTOME_LATE_PHASE_OF_HIV_LIFE_CYCLE	1	1	320	94	0
REACTOME_LIPID_DIGESTION_MOBILIZATION_AND_TRANSPORT	REACTOME_LIPID_DIGESTION_MOBILIZATION_AND_TRANSPORT	1	1	320	45	0
REACTOME_LIPOPROTEIN_METABOLISM	REACTOME_LIPOPROTEIN_METABOLISM	1	1	320	28	0
REACTOME_LYSOSOME_VESICLE_BIOGENESIS	REACTOME_LYSOSOME_VESICLE_BIOGENESIS	1	1	320	23	0
REACTOME_M_G1_TRANSITION	REACTOME_M_G1_TRANSITION	1	1	320	79	0
REACTOME_MAP_KINASE_ACTIVATION_IN_TLR_CASCADE	REACTOME_MAP_KINASE_ACTIVATION_IN_TLR_CASCADE	1	1	320	49	0
REACTOME_MAPK_TARGETS_NUCLEAR_EVENTS_MEDIATED_BY_MAP_KINASES	REACTOME_MAPK_TARGETS_NUCLEAR_EVENTS_MEDIATED_BY_MAP_KINASES	1	1	320	30	0
REACTOME_MEIOSIS	REACTOME_MEIOSIS	1	1	320	111	0
REACTOME_MEIOTIC_RECOMBINATION	REACTOME_MEIOTIC_RECOMBINATION	1	1	320	83	0
REACTOME_MEIOTIC_SYNAPSIS	REACTOME_MEIOTIC_SYNAPSIS	1	1	320	71	0
REACTOME_MEMBRANE_BINDING_AND_TARGETTING_OF_GAG_PROTEINS	REACTOME_MEMBRANE_BINDING_AND_TARGETTING_OF_GAG_PROTEINS	1	1	320	10	0
REACTOME_MEMBRANE_TRAFFICKING	REACTOME_MEMBRANE_TRAFFICKING	1	1	320	125	0
REACTOME_METABOLISM_OF_NON_CODING_RNA	REACTOME_METABOLISM_OF_NON_CODING_RNA	1	1	320	48	0
REACTOME_METABOLISM_OF_NUCLEOTIDES	REACTOME_METABOLISM_OF_NUCLEOTIDES	0.332761	1	320	70	1	GPX1
REACTOME_METABOLISM_OF_POLYAMINES	REACTOME_METABOLISM_OF_POLYAMINES	1	1	320	14	0
REACTOME_METABOLISM_OF_VITAMINS_AND_COFACTORS	REACTOME_METABOLISM_OF_VITAMINS_AND_COFACTORS	1	1	320	51	0
REACTOME_MHC_CLASS_II_ANTIGEN_PRESENTATION	REACTOME_MHC_CLASS_II_ANTIGEN_PRESENTATION	0.398742	1	320	88	1	HLA-DQA2
REACTOME_MICRORNA_MIRNA_BIOGENESIS	REACTOME_MICRORNA_MIRNA_BIOGENESIS	1	1	320	18	0
REACTOME_MITOCHONDRIAL_FATTY_ACID_BETA_OXIDATION	REACTOME_MITOCHONDRIAL_FATTY_ACID_BETA_OXIDATION	1	1	320	14	0
REACTOME_MITOCHONDRIAL_PROTEIN_IMPORT	REACTOME_MITOCHONDRIAL_PROTEIN_IMPORT	1	1	320	45	0
REACTOME_MITOCHONDRIAL_TRNA_AMINOACYLATION	REACTOME_MITOCHONDRIAL_TRNA_AMINOACYLATION	1	1	320	21	0
REACTOME_MITOTIC_G1_G1_S_PHASES	REACTOME_MITOTIC_G1_G1_S_PHASES	1	1	320	133	0
REACTOME_MITOTIC_G2_G2_M_PHASES	REACTOME_MITOTIC_G2_G2_M_PHASES	0.362933	1	320	78	1	PRKAR2B
REACTOME_MITOTIC_M_M_G1_PHASES	REACTOME_MITOTIC_M_M_G1_PHASES	1	1	320	162	0
REACTOME_MITOTIC_PROMETAPHASE	REACTOME_MITOTIC_PROMETAPHASE	1	1	320	79	0
REACTOME_MRNA_3_END_PROCESSING	REACTOME_MRNA_3_END_PROCESSING	1	1	320	33	0
REACTOME_MRNA_CAPPING	REACTOME_MRNA_CAPPING	1	1	320	29	0
REACTOME_MRNA_DECAY_BY_3_TO_5_EXORIBONUCLEASE	REACTOME_MRNA_DECAY_BY_3_TO_5_EXORIBONUCLEASE	1	1	320	11	0
REACTOME_MRNA_PROCESSING	REACTOME_MRNA_PROCESSING	1	1	320	153	0
REACTOME_MRNA_SPLICING	REACTOME_MRNA_SPLICING	1	1	320	105	0
REACTOME_MRNA_SPLICING_MINOR_PATHWAY	REACTOME_MRNA_SPLICING_MINOR_PATHWAY	1	1	320	41	0
REACTOME_MUSCLE_CONTRACTION	REACTOME_MUSCLE_CONTRACTION	1	1	320	47	0
REACTOME_MYD88_MAL_CASCADE_INITIATED_ON_PLASMA_MEMBRANE	REACTOME_MYD88_MAL_CASCADE_INITIATED_ON_PLASMA_MEMBRANE	1	1	320	82	0
REACTOME_N_GLYCAN_ANTENNAE_ELONGATION	REACTOME_N_GLYCAN_ANTENNAE_ELONGATION	1	1	320	14	0
REACTOME_N_GLYCAN_ANTENNAE_ELONGATION_IN_THE_MEDIAL_TRANS_GOLGI	REACTOME_N_GLYCAN_ANTENNAE_ELONGATION_IN_THE_MEDIAL_TRANS_GOLGI	1	1	320	18	0
REACTOME_N_GLYCAN_TRIMMING_IN_THE_ER_AND_CALNEXIN_CALRETICULIN_CYCLE	REACTOME_N_GLYCAN_TRIMMING_IN_THE_ER_AND_CALNEXIN_CALRETICULIN_CYCLE	1	1	320	13	0
REACTOME_NA_CL_DEPENDENT_NEUROTRANSMITTER_TRANSPORTERS	REACTOME_NA_CL_DEPENDENT_NEUROTRANSMITTER_TRANSPORTERS	1	1	320	17	0
REACTOME_NCAM1_INTERACTIONS	REACTOME_NCAM1_INTERACTIONS	1	1	320	39	0
REACTOME_NCAM_SIGNALING_FOR_NEURITE_OUT_GROWTH	REACTOME_NCAM_SIGNALING_FOR_NEURITE_OUT_GROWTH	0.309201	1	320	64	1	FGFR1
REACTOME_NEF_MEDIATED_DOWNREGULATION_OF_MHC_CLASS_I_COMPLEX_CELL_SURFACE_EXPRESSION	REACTOME_NEF_MEDIATED_DOWNREGULATION_OF_MHC_CLASS_I_COMPLEX_CELL_SURFACE_EXPRESSION	1	1	320	10	0
REACTOME_NEF_MEDIATES_DOWN_MODULATION_OF_CELL_SURFACE_RECEPTORS_BY_RECRUITING_THEM_TO_CLATHRIN_ADAPTERS	REACTOME_NEF_MEDIATES_DOWN_MODULATION_OF_CELL_SURFACE_RECEPTORS_BY_RECRUITING_THEM_TO_CLATHRIN_ADAPTERS	1	1	320	21	0
REACTOME_NEGATIVE_REGULATION_OF_THE_PI3K_AKT_NETWORK	REACTOME_NEGATIVE_REGULATION_OF_THE_PI3K_AKT_NETWORK	1	1	320	7	0
REACTOME_NEGATIVE_REGULATORS_OF_RIG_I_MDA5_SIGNALING	REACTOME_NEGATIVE_REGULATORS_OF_RIG_I_MDA5_SIGNALING	1	1	320	31	0
REACTOME_NEP_NS2_INTERACTS_WITH_THE_CELLULAR_EXPORT_MACHINERY	REACTOME_NEP_NS2_INTERACTS_WITH_THE_CELLULAR_EXPORT_MACHINERY	1	1	320	26	0
REACTOME_NEPHRIN_INTERACTIONS	REACTOME_NEPHRIN_INTERACTIONS	1	1	320	19	0
REACTOME_NFKB_ACTIVATION_THROUGH_FADD_RIP1_PATHWAY_MEDIATED_BY_CASPASE_8_AND10	REACTOME_NFKB_ACTIVATION_THROUGH_FADD_RIP1_PATHWAY_MEDIATED_BY_CASPASE_8_AND10	1	1	320	12	0
REACTOME_NFKB_AND_MAP_KINASES_ACTIVATION_MEDIATED_BY_TLR4_SIGNALING_REPERTOIRE	REACTOME_NFKB_AND_MAP_KINASES_ACTIVATION_MEDIATED_BY_TLR4_SIGNALING_REPERTOIRE	1	1	320	71	0
REACTOME_NFKB_IS_ACTIVATED_AND_SIGNALS_SURVIVAL	REACTOME_NFKB_IS_ACTIVATED_AND_SIGNALS_SURVIVAL	1	1	320	11	0
REACTOME_NOD1_2_SIGNALING_PATHWAY	REACTOME_NOD1_2_SIGNALING_PATHWAY	1	1	320	30	0
REACTOME_NONSENSE_MEDIATED_DECAY_ENHANCED_BY_THE_EXON_JUNCTION_COMPLEX	REACTOME_NONSENSE_MEDIATED_DECAY_ENHANCED_BY_THE_EXON_JUNCTION_COMPLEX	1	1	320	137	0
REACTOME_NOTCH1_INTRACELLULAR_DOMAIN_REGULATES_TRANSCRIPTION	REACTOME_NOTCH1_INTRACELLULAR_DOMAIN_REGULATES_TRANSCRIPTION	1	1	320	45	0
REACTOME_NOTCH_HLH_TRANSCRIPTION_PATHWAY	REACTOME_NOTCH_HLH_TRANSCRIPTION_PATHWAY	1	1	320	12	0
REACTOME_NRAGE_SIGNALS_DEATH_THROUGH_JNK	REACTOME_NRAGE_SIGNALS_DEATH_THROUGH_JNK	1	1	320	43	0
REACTOME_NRIF_SIGNALS_CELL_DEATH_FROM_THE_NUCLEUS	REACTOME_NRIF_SIGNALS_CELL_DEATH_FROM_THE_NUCLEUS	1	1	320	15	0
REACTOME_NUCLEAR_EVENTS_KINASE_AND_TRANSCRIPTION_FACTOR_ACTIVATION	REACTOME_NUCLEAR_EVENTS_KINASE_AND_TRANSCRIPTION_FACTOR_ACTIVATION	1	1	320	24	0
REACTOME_NUCLEAR_SIGNALING_BY_ERBB4	REACTOME_NUCLEAR_SIGNALING_BY_ERBB4	1	1	320	38	0
REACTOME_NUCLEOTIDE_EXCISION_REPAIR	REACTOME_NUCLEOTIDE_EXCISION_REPAIR	1	1	320	49	0
REACTOME_NUCLEOTIDE_LIKE_PURINERGIC_RECEPTORS	REACTOME_NUCLEOTIDE_LIKE_PURINERGIC_RECEPTORS	1	1	320	16	0
REACTOME_OPSINS	REACTOME_OPSINS	1	1	320	10	0
REACTOME_ORC1_REMOVAL_FROM_CHROMATIN	REACTOME_ORC1_REMOVAL_FROM_CHROMATIN	1	1	320	66	0
REACTOME_OTHER_SEMAPHORIN_INTERACTIONS	REACTOME_OTHER_SEMAPHORIN_INTERACTIONS	1	1	320	15	0
REACTOME_OXYGEN_DEPENDENT_PROLINE_HYDROXYLATION_OF_HYPOXIA_INDUCIBLE_FACTOR_ALPHA	REACTOME_OXYGEN_DEPENDENT_PROLINE_HYDROXYLATION_OF_HYPOXIA_INDUCIBLE_FACTOR_ALPHA	1	1	320	15	0
REACTOME_P130CAS_LINKAGE_TO_MAPK_SIGNALING_FOR_INTEGRINS	REACTOME_P130CAS_LINKAGE_TO_MAPK_SIGNALING_FOR_INTEGRINS	1	1	320	15	0
REACTOME_P2Y_RECEPTORS	REACTOME_P2Y_RECEPTORS	1	1	320	12	0
REACTOME_P38MAPK_EVENTS	REACTOME_P38MAPK_EVENTS	1	1	320	13	0
REACTOME_P53_DEPENDENT_G1_DNA_DAMAGE_RESPONSE	REACTOME_P53_DEPENDENT_G1_DNA_DAMAGE_RESPONSE	1	1	320	54	0
REACTOME_P53_INDEPENDENT_G1_S_DNA_DAMAGE_CHECKPOINT	REACTOME_P53_INDEPENDENT_G1_S_DNA_DAMAGE_CHECKPOINT	1	1	320	49	0
REACTOME_P75_NTR_RECEPTOR_MEDIATED_SIGNALLING	REACTOME_P75_NTR_RECEPTOR_MEDIATED_SIGNALLING	0.366608	1	320	79	1	LINGO1
REACTOME_P75NTR_RECRUITS_SIGNALLING_COMPLEXES	REACTOME_P75NTR_RECRUITS_SIGNALLING_COMPLEXES	1	1	320	12	0
REACTOME_P75NTR_SIGNALS_VIA_NFKB	REACTOME_P75NTR_SIGNALS_VIA_NFKB	1	1	320	14	0
REACTOME_PACKAGING_OF_TELOMERE_ENDS	REACTOME_PACKAGING_OF_TELOMERE_ENDS	1	1	320	48	0
REACTOME_PASSIVE_TRANSPORT_BY_AQUAPORINS	REACTOME_PASSIVE_TRANSPORT_BY_AQUAPORINS	1	1	320	11	0
REACTOME_PECAM1_INTERACTIONS	REACTOME_PECAM1_INTERACTIONS	1	1	320	10	0
REACTOME_PEPTIDE_CHAIN_ELONGATION	REACTOME_PEPTIDE_CHAIN_ELONGATION	1	1	320	116	0
REACTOME_PEPTIDE_HORMONE_BIOSYNTHESIS	REACTOME_PEPTIDE_HORMONE_BIOSYNTHESIS	1	1	320	13	0
REACTOME_PERK_REGULATED_GENE_EXPRESSION	REACTOME_PERK_REGULATED_GENE_EXPRESSION	1	1	320	27	0
REACTOME_PHOSPHORYLATION_OF_THE_APC_C	REACTOME_PHOSPHORYLATION_OF_THE_APC_C	1	1	320	17	0
REACTOME_PI3K_AKT_ACTIVATION	REACTOME_PI3K_AKT_ACTIVATION	1	1	320	36	0
REACTOME_PI3K_EVENTS_IN_ERBB2_SIGNALING	REACTOME_PI3K_EVENTS_IN_ERBB2_SIGNALING	1	1	320	42	0
REACTOME_PI3K_EVENTS_IN_ERBB4_SIGNALING	REACTOME_PI3K_EVENTS_IN_ERBB4_SIGNALING	1	1	320	36	0
REACTOME_PIP3_ACTIVATES_AKT_SIGNALING	REACTOME_PIP3_ACTIVATES_AKT_SIGNALING	1	1	320	27	0
REACTOME_PLATELET_ACTIVATION_SIGNALING_AND_AGGREGATION	REACTOME_PLATELET_ACTIVATION_SIGNALING_AND_AGGREGATION	1	1	320	199	0
REACTOME_PLATELET_ADHESION_TO_EXPOSED_COLLAGEN	REACTOME_PLATELET_ADHESION_TO_EXPOSED_COLLAGEN	1	1	320	12	0
REACTOME_PLATELET_AGGREGATION_PLUG_FORMATION	REACTOME_PLATELET_AGGREGATION_PLUG_FORMATION	1	1	320	36	0
REACTOME_PLATELET_SENSITIZATION_BY_LDL	REACTOME_PLATELET_SENSITIZATION_BY_LDL	1	1	320	16	0
REACTOME_POL_SWITCHING	REACTOME_POL_SWITCHING	1	1	320	13	0
REACTOME_POST_CHAPERONIN_TUBULIN_FOLDING_PATHWAY	REACTOME_POST_CHAPERONIN_TUBULIN_FOLDING_PATHWAY	1	1	320	17	0
REACTOME_POST_TRANSLATIONAL_MODIFICATION_SYNTHESIS_OF_GPI_ANCHORED_PROTEINS	REACTOME_POST_TRANSLATIONAL_MODIFICATION_SYNTHESIS_OF_GPI_ANCHORED_PROTEINS	1	1	320	26	0
REACTOME_PRE_NOTCH_EXPRESSION_AND_PROCESSING	REACTOME_PRE_NOTCH_EXPRESSION_AND_PROCESSING	1	1	320	38	0
REACTOME_PRE_NOTCH_PROCESSING_IN_GOLGI	REACTOME_PRE_NOTCH_PROCESSING_IN_GOLGI	1	1	320	16	0
REACTOME_PRE_NOTCH_TRANSCRIPTION_AND_TRANSLATION	REACTOME_PRE_NOTCH_TRANSCRIPTION_AND_TRANSLATION	1	1	320	23	0
REACTOME_PREFOLDIN_MEDIATED_TRANSFER_OF_SUBSTRATE_TO_CCT_TRIC	REACTOME_PREFOLDIN_MEDIATED_TRANSFER_OF_SUBSTRATE_TO_CCT_TRIC	1	1	320	27	0
REACTOME_PROCESSING_OF_CAPPED_INTRON_CONTAINING_PRE_MRNA	REACTOME_PROCESSING_OF_CAPPED_INTRON_CONTAINING_PRE_MRNA	1	1	320	133	0
REACTOME_PROCESSING_OF_CAPPED_INTRONLESS_PRE_MRNA	REACTOME_PROCESSING_OF_CAPPED_INTRONLESS_PRE_MRNA	1	1	320	23	0
REACTOME_PROCESSING_OF_INTRONLESS_PRE_MRNAS	REACTOME_PROCESSING_OF_INTRONLESS_PRE_MRNAS	1	1	320	14	0
REACTOME_PROCESSIVE_SYNTHESIS_ON_THE_LAGGING_STRAND	REACTOME_PROCESSIVE_SYNTHESIS_ON_THE_LAGGING_STRAND	1	1	320	15	0
REACTOME_PROLACTIN_RECEPTOR_SIGNALING	REACTOME_PROLACTIN_RECEPTOR_SIGNALING	1	1	320	14	0
REACTOME_PROLONGED_ERK_ACTIVATION_EVENTS	REACTOME_PROLONGED_ERK_ACTIVATION_EVENTS	1	1	320	19	0
REACTOME_PROSTACYCLIN_SIGNALLING_THROUGH_PROSTACYCLIN_RECEPTOR	REACTOME_PROSTACYCLIN_SIGNALLING_THROUGH_PROSTACYCLIN_RECEPTOR	1	1	320	19	0
REACTOME_PROSTANOID_LIGAND_RECEPTORS	REACTOME_PROSTANOID_LIGAND_RECEPTORS	1	1	320	8	0
REACTOME_PROTEIN_FOLDING	REACTOME_PROTEIN_FOLDING	1	1	320	50	0
REACTOME_PURINE_RIBONUCLEOSIDE_MONOPHOSPHATE_BIOSYNTHESIS	REACTOME_PURINE_RIBONUCLEOSIDE_MONOPHOSPHATE_BIOSYNTHESIS	1	1	320	11	0
REACTOME_PURINE_SALVAGE	REACTOME_PURINE_SALVAGE	1	1	320	13	0
REACTOME_PYRIMIDINE_CATABOLISM	REACTOME_PYRIMIDINE_CATABOLISM	1	1	320	11	0
REACTOME_PYRIMIDINE_METABOLISM	REACTOME_PYRIMIDINE_METABOLISM	1	1	320	23	0
REACTOME_PYRUVATE_METABOLISM	REACTOME_PYRUVATE_METABOLISM	1	1	320	18	0
REACTOME_PYRUVATE_METABOLISM_AND_CITRIC_ACID_TCA_CYCLE	REACTOME_PYRUVATE_METABOLISM_AND_CITRIC_ACID_TCA_CYCLE	1	1	320	41	0
REACTOME_RAF_MAP_KINASE_CASCADE	REACTOME_RAF_MAP_KINASE_CASCADE	1	1	320	10	0
REACTOME_RAP1_SIGNALLING	REACTOME_RAP1_SIGNALLING	1	1	320	16	0
REACTOME_RAS_ACTIVATION_UOPN_CA2_INFUX_THROUGH_NMDA_RECEPTOR	REACTOME_RAS_ACTIVATION_UOPN_CA2_INFUX_THROUGH_NMDA_RECEPTOR	1	1	320	17	0
REACTOME_RECEPTOR_LIGAND_BINDING_INITIATES_THE_SECOND_PROTEOLYTIC_CLEAVAGE_OF_NOTCH_RECEPTOR	REACTOME_RECEPTOR_LIGAND_BINDING_INITIATES_THE_SECOND_PROTEOLYTIC_CLEAVAGE_OF_NOTCH_RECEPTOR	1	1	320	12	0
REACTOME_RECRUITMENT_OF_MITOTIC_CENTROSOME_PROTEINS_AND_COMPLEXES	REACTOME_RECRUITMENT_OF_MITOTIC_CENTROSOME_PROTEINS_AND_COMPLEXES	0.305195	1	320	63	1	PRKAR2B
REACTOME_RECRUITMENT_OF_NUMA_TO_MITOTIC_CENTROSOMES	REACTOME_RECRUITMENT_OF_NUMA_TO_MITOTIC_CENTROSOMES	1	1	320	10	0
REACTOME_RECYCLING_OF_BILE_ACIDS_AND_SALTS	REACTOME_RECYCLING_OF_BILE_ACIDS_AND_SALTS	1	1	320	11	0
REACTOME_REGULATED_PROTEOLYSIS_OF_P75NTR	REACTOME_REGULATED_PROTEOLYSIS_OF_P75NTR	1	1	320	10	0
REACTOME_REGULATION_OF_AMPK_ACTIVITY_VIA_LKB1	REACTOME_REGULATION_OF_AMPK_ACTIVITY_VIA_LKB1	1	1	320	14	0
REACTOME_REGULATION_OF_COMPLEMENT_CASCADE	REACTOME_REGULATION_OF_COMPLEMENT_CASCADE	1	1	320	13	0
REACTOME_REGULATION_OF_GENE_EXPRESSION_IN_BETA_CELLS	REACTOME_REGULATION_OF_GENE_EXPRESSION_IN_BETA_CELLS	1	1	320	20	0
REACTOME_REGULATION_OF_GLUCOKINASE_BY_GLUCOKINASE_REGULATORY_PROTEIN	REACTOME_REGULATION_OF_GLUCOKINASE_BY_GLUCOKINASE_REGULATORY_PROTEIN	1	1	320	26	0
REACTOME_REGULATION_OF_HYPOXIA_INDUCIBLE_FACTOR_HIF_BY_OXYGEN	REACTOME_REGULATION_OF_HYPOXIA_INDUCIBLE_FACTOR_HIF_BY_OXYGEN	1	1	320	22	0
REACTOME_REGULATION_OF_IFNA_SIGNALING	REACTOME_REGULATION_OF_IFNA_SIGNALING	1	1	320	24	0
REACTOME_REGULATION_OF_IFNG_SIGNALING	REACTOME_REGULATION_OF_IFNG_SIGNALING	1	1	320	13	0
REACTOME_REGULATION_OF_INSULIN_LIKE_GROWTH_FACTOR_IGF_ACTIVITY_BY_INSULIN_LIKE_GROWTH_FACTOR_BINDING_PROTEINS_IGFBPS	REACTOME_REGULATION_OF_INSULIN_LIKE_GROWTH_FACTOR_IGF_ACTIVITY_BY_INSULIN_LIKE_GROWTH_FACTOR_BINDING_PROTEINS_IGFBPS	1	1	320	16	0
REACTOME_REGULATION_OF_KIT_SIGNALING	REACTOME_REGULATION_OF_KIT_SIGNALING	1	1	320	16	0
REACTOME_REGULATION_OF_MITOTIC_CELL_CYCLE	REACTOME_REGULATION_OF_MITOTIC_CELL_CYCLE	1	1	320	78	0
REACTOME_REGULATION_OF_MRNA_STABILITY_BY_PROTEINS_THAT_BIND_AU_RICH_ELEMENTS	REACTOME_REGULATION_OF_MRNA_STABILITY_BY_PROTEINS_THAT_BIND_AU_RICH_ELEMENTS	1	1	320	82	0
REACTOME_REGULATION_OF_ORNITHINE_DECARBOXYLASE_ODC	REACTOME_REGULATION_OF_ORNITHINE_DECARBOXYLASE_ODC	1	1	320	48	0
REACTOME_REGULATION_OF_PYRUVATE_DEHYDROGENASE_PDH_COMPLEX	REACTOME_REGULATION_OF_PYRUVATE_DEHYDROGENASE_PDH_COMPLEX	1	1	320	12	0
REACTOME_REGULATION_OF_RHEB_GTPASE_ACTIVITY_BY_AMPK	REACTOME_REGULATION_OF_RHEB_GTPASE_ACTIVITY_BY_AMPK	1	1	320	10	0
REACTOME_REGULATION_OF_SIGNALING_BY_CBL	REACTOME_REGULATION_OF_SIGNALING_BY_CBL	1	1	320	18	0
REACTOME_REGULATION_OF_THE_FANCONI_ANEMIA_PATHWAY	REACTOME_REGULATION_OF_THE_FANCONI_ANEMIA_PATHWAY	1	1	320	8	0
REACTOME_REGULATORY_RNA_PATHWAYS	REACTOME_REGULATORY_RNA_PATHWAYS	1	1	320	21	0
REACTOME_REMOVAL_OF_THE_FLAP_INTERMEDIATE_FROM_THE_C_STRAND	REACTOME_REMOVAL_OF_THE_FLAP_INTERMEDIATE_FROM_THE_C_STRAND	1	1	320	10	0
REACTOME_REPAIR_SYNTHESIS_FOR_GAP_FILLING_BY_DNA_POL_IN_TC_NER	REACTOME_REPAIR_SYNTHESIS_FOR_GAP_FILLING_BY_DNA_POL_IN_TC_NER	1	1	320	14	0
REACTOME_RESOLUTION_OF_AP_SITES_VIA_THE_MULTIPLE_NUCLEOTIDE_PATCH_REPLACEMENT_PATHWAY	REACTOME_RESOLUTION_OF_AP_SITES_VIA_THE_MULTIPLE_NUCLEOTIDE_PATCH_REPLACEMENT_PATHWAY	1	1	320	17	0
REACTOME_RESOLUTION_OF_AP_SITES_VIA_THE_SINGLE_NUCLEOTIDE_REPLACEMENT_PATHWAY	REACTOME_RESOLUTION_OF_AP_SITES_VIA_THE_SINGLE_NUCLEOTIDE_REPLACEMENT_PATHWAY	1	1	320	12	0
REACTOME_RESPIRATORY_ELECTRON_TRANSPORT	REACTOME_RESPIRATORY_ELECTRON_TRANSPORT	0.317145	1	320	66	1	NDUFC2
REACTOME_RESPIRATORY_ELECTRON_TRANSPORT_ATP_SYNTHESIS_BY_CHEMIOSMOTIC_COUPLING_AND_HEAT_PRODUCTION_BY_UNCOUPLING_PROTEINS_	REACTOME_RESPIRATORY_ELECTRON_TRANSPORT_ATP_SYNTHESIS_BY_CHEMIOSMOTIC_COUPLING_AND_HEAT_PRODUCTION_BY_UNCOUPLING_PROTEINS_	0.328891	1	320	69	1	NDUFC2
REACTOME_RESPONSE_TO_ELEVATED_PLATELET_CYTOSOLIC_CA2_	REACTOME_RESPONSE_TO_ELEVATED_PLATELET_CYTOSOLIC_CA2_	1	1	320	82	0
REACTOME_RETROGRADE_NEUROTROPHIN_SIGNALLING	REACTOME_RETROGRADE_NEUROTROPHIN_SIGNALLING	1	1	320	13	0
REACTOME_REVERSIBLE_HYDRATION_OF_CARBON_DIOXIDE	REACTOME_REVERSIBLE_HYDRATION_OF_CARBON_DIOXIDE	1	1	320	12	0
REACTOME_RIG_I_MDA5_MEDIATED_INDUCTION_OF_IFN_ALPHA_BETA_PATHWAYS	REACTOME_RIG_I_MDA5_MEDIATED_INDUCTION_OF_IFN_ALPHA_BETA_PATHWAYS	1	1	320	72	0
REACTOME_RIP_MEDIATED_NFKB_ACTIVATION_VIA_DAI	REACTOME_RIP_MEDIATED_NFKB_ACTIVATION_VIA_DAI	1	1	320	18	0
REACTOME_RNA_POL_I_PROMOTER_OPENING	REACTOME_RNA_POL_I_PROMOTER_OPENING	1	1	320	61	0
REACTOME_RNA_POL_I_RNA_POL_III_AND_MITOCHONDRIAL_TRANSCRIPTION	REACTOME_RNA_POL_I_RNA_POL_III_AND_MITOCHONDRIAL_TRANSCRIPTION	1	1	320	117	0
REACTOME_RNA_POL_I_TRANSCRIPTION	REACTOME_RNA_POL_I_TRANSCRIPTION	1	1	320	85	0
REACTOME_RNA_POL_I_TRANSCRIPTION_INITIATION	REACTOME_RNA_POL_I_TRANSCRIPTION_INITIATION	1	1	320	24	0
REACTOME_RNA_POL_I_TRANSCRIPTION_TERMINATION	REACTOME_RNA_POL_I_TRANSCRIPTION_TERMINATION	1	1	320	20	0
REACTOME_RNA_POL_II_PRE_TRANSCRIPTION_EVENTS	REACTOME_RNA_POL_II_PRE_TRANSCRIPTION_EVENTS	1	1	320	52	0
REACTOME_RNA_POL_II_TRANSCRIPTION	REACTOME_RNA_POL_II_TRANSCRIPTION	1	1	320	94	0
REACTOME_RNA_POL_II_TRANSCRIPTION_PRE_INITIATION_AND_PROMOTER_OPENING	REACTOME_RNA_POL_II_TRANSCRIPTION_PRE_INITIATION_AND_PROMOTER_OPENING	1	1	320	40	0
REACTOME_RNA_POL_III_CHAIN_ELONGATION	REACTOME_RNA_POL_III_CHAIN_ELONGATION	1	1	320	17	0
REACTOME_RNA_POL_III_TRANSCRIPTION	REACTOME_RNA_POL_III_TRANSCRIPTION	1	1	320	33	0
REACTOME_RNA_POL_III_TRANSCRIPTION_INITIATION_FROM_TYPE_2_PROMOTER	REACTOME_RNA_POL_III_TRANSCRIPTION_INITIATION_FROM_TYPE_2_PROMOTER	1	1	320	23	0
REACTOME_RNA_POL_III_TRANSCRIPTION_INITIATION_FROM_TYPE_3_PROMOTER	REACTOME_RNA_POL_III_TRANSCRIPTION_INITIATION_FROM_TYPE_3_PROMOTER	1	1	320	26	0
[truncated: 349 more rows]

## Sheet: Pathways down in ILC vs IDC
Supplementary Table 3.
List of significantly downregulated pathways in ILC vs IDC cell lines
	Pathway	Path_pval	Path_qval	TotalNumOfDEGenes	NumOfGenesInPath	NumOfDEGenesInPath	DEgenes
REACTOME_INTERFERON_SIGNALING	REACTOME_INTERFERON_SIGNALING	8.02512e-11	1.88269e-07	387	154	13	HERC5	HLA-DRB1	HLA-DRB5	ICAM1	IFI27	IFI6	IFIT1	IFIT3	IFITM2	IFITM3	ISG15	MX1	OAS3
REACTOME_INTERFERON_ALPHA_BETA_SIGNALING	REACTOME_INTERFERON_ALPHA_BETA_SIGNALING	5.97857e-10	7.01286e-07	387	63	9	IFI27	IFI6	IFIT1	IFIT3	IFITM2	IFITM3	ISG15	MX1	OAS3
KEGG_SYSTEMIC_LUPUS_ERYTHEMATOSUS	KEGG_SYSTEMIC_LUPUS_ERYTHEMATOSUS	3.63892e-09	2.84564e-06	387	136	11	C3	HIST1H2AI	HIST1H2BC	HIST1H2BK	HIST1H3H	HIST2H2AA4	HIST2H3A	HIST2H3C	HIST2H4A	HLA-DRB1	HLA-DRB5
REACTOME_AMYLOIDS	REACTOME_AMYLOIDS	5.90222e-09	3.46165e-06	387	81	9	GSN	HIST1H2BC	HIST1H2BK	HIST1H3H	HIST2H2AA4	HIST2H3A	HIST2H3C	HIST2H4A	TGFBI
REACTOME_RNA_POL_I_TRANSCRIPTION	REACTOME_RNA_POL_I_TRANSCRIPTION	1.55522e-07	7.29709e-05	387	85	8	HIST1H2BC	HIST1H2BK	HIST1H3H	HIST2H2AA4	HIST2H3A	HIST2H3C	HIST2H4A	TAF1C
REACTOME_RNA_POL_I_PROMOTER_OPENING	REACTOME_RNA_POL_I_PROMOTER_OPENING	2.37977e-07	9.30491e-05	387	61	7	HIST1H2BC	HIST1H2BK	HIST1H3H	HIST2H2AA4	HIST2H3A	HIST2H3C	HIST2H4A
ENZYME_INHIBITOR_ACTIVITY	ENZYME_INHIBITOR_ACTIVITY	1.93638e-06	0.000517679	387	118	8	ANGPTL4	PKIA	PROS1	SERPINA6	SFN	SPINK5	TIMP1	TIMP2
REACTOME_MEIOTIC_RECOMBINATION	REACTOME_MEIOTIC_RECOMBINATION	1.98598e-06	0.000517679	387	83	7	HIST1H2BC	HIST1H2BK	HIST1H3H	HIST2H2AA4	HIST2H3A	HIST2H3C	HIST2H4A
REACTOME_RNA_POL_I_RNA_POL_III_AND_MITOCHONDRIAL_TRANSCRIPTION	REACTOME_RNA_POL_I_RNA_POL_III_AND_MITOCHONDRIAL_TRANSCRIPTION	1.81604e-06	0.000517679	387	117	8	HIST1H2BC	HIST1H2BK	HIST1H3H	HIST2H2AA4	HIST2H3A	HIST2H3C	HIST2H4A	TAF1C
EXTRACELLULAR_STRUCTURE_ORGANIZATION_AND_BIOGENESIS	EXTRACELLULAR_STRUCTURE_ORGANIZATION_AND_BIOGENESIS	2.33952e-06	0.00054885	387	31	5	AGRN	PCDHB11	PCDHB5	PCDHB9	SPINK5
PROTEIN_DIMERIZATION_ACTIVITY	PROTEIN_DIMERIZATION_ACTIVITY	4.38546e-06	0.000935298	387	175	9	ABCG2	APOE	CAV2	EGFR	IGSF1	MAP3K11	NR6A1	TP53	TYRP1
POSITIVE_REGULATION_OF_CELL_PROLIFERATION	POSITIVE_REGULATION_OF_CELL_PROLIFERATION	1.04025e-05	0.00187725	387	148	8	EGFR	FLT4	LIF	LYN	PDF	SPHK1	TBX2	TIMP1
PROTEASE_INHIBITOR_ACTIVITY	PROTEASE_INHIBITOR_ACTIVITY	9.74485e-06	0.00187725	387	41	5	PROS1	SERPINA6	SPINK5	TIMP1	TIMP2
REACTOME_CELL_CELL_COMMUNICATION	REACTOME_CELL_CELL_COMMUNICATION	1.45792e-05	0.00225138	387	112	7	CDH1	CLDN1	CLDN3	DSCAM	FBLIM1	ITGB4	SIRPA
REACTOME_MEIOSIS	REACTOME_MEIOSIS	1.37496e-05	0.00225138	387	111	7	HIST1H2BC	HIST1H2BK	HIST1H3H	HIST2H2AA4	HIST2H3A	HIST2H3C	HIST2H4A
SYNAPSE_ORGANIZATION_AND_BIOGENESIS	SYNAPSE_ORGANIZATION_AND_BIOGENESIS	1.53547e-05	0.00225138	387	22	4	AGRN	PCDHB11	PCDHB5	PCDHB9
PROTEIN_HOMODIMERIZATION_ACTIVITY	PROTEIN_HOMODIMERIZATION_ACTIVITY	1.63629e-05	0.00225808	387	114	7	ABCG2	APOE	CAV2	IGSF1	MAP3K11	NR6A1	TYRP1
KEGG_CELL_ADHESION_MOLECULES_CAMS	KEGG_CELL_ADHESION_MOLECULES_CAMS	3.45882e-05	0.004508	387	128	7	CDH1	CLDN1	CLDN3	HLA-DRB1	HLA-DRB5	ICAM1	NCAM2
KEGG_NATURAL_KILLER_CELL_MEDIATED_CYTOTOXICITY	KEGG_NATURAL_KILLER_CELL_MEDIATED_CYTOTOXICITY	4.0115e-05	0.00495314	387	131	7	FAS	ICAM1	MICB	NFATC2	TNFRSF10C	ULBP2	ULBP3
NEGATIVE_REGULATION_OF_HYDROLASE_ACTIVITY	NEGATIVE_REGULATION_OF_HYDROLASE_ACTIVITY	5.309e-05	0.00622746	387	11	3	ANGPTL4	IFI6	SFN
REACTOME_IMMUNOREGULATORY_INTERACTIONS_BETWEEN_A_LYMPHOID_AND_A_NON_LYMPHOID_CELL	REACTOME_IMMUNOREGULATORY_INTERACTIONS_BETWEEN_A_LYMPHOID_AND_A_NON_LYMPHOID_CELL	6.37212e-05	0.00711857	387	60	5	C3	CDH1	ICAM1	ULBP2	ULBP3
INTERCELLULAR_JUNCTION	INTERCELLULAR_JUNCTION	8.06182e-05	0.00756521	387	63	5	AMOTL1	CDH1	CLDN1	CLDN3	GJB2
KEGG_FOCAL_ADHESION	KEGG_FOCAL_ADHESION	8.01332e-05	0.00756521	387	197	8	CAV1	CAV2	COL5A1	COL6A2	EGFR	FLT4	ITGB4	MYL9
PROTEIN_TYROSINE_KINASE_ACTIVITY	PROTEIN_TYROSINE_KINASE_ACTIVITY	8.06182e-05	0.00756521	387	63	5	EGFR	FLT4	KIT	LYN	PTK7
REACTOME_TRANSCRIPTION	REACTOME_TRANSCRIPTION	7.46322e-05	0.00756521	387	195	8	HIST1H2BC	HIST1H2BK	HIST1H3H	HIST2H2AA4	HIST2H3A	HIST2H3C	HIST2H4A	TAF1C
NEGATIVE_REGULATION_OF_CATALYTIC_ACTIVITY	NEGATIVE_REGULATION_OF_CATALYTIC_ACTIVITY	9.36649e-05	0.00813844	387	65	5	ANGPTL4	IFI6	LATS2	SFN	TP53
REACTOME_REGULATION_OF_COMPLEMENT_CASCADE	REACTOME_REGULATION_OF_COMPLEMENT_CASCADE	9.10737e-05	0.00813844	387	13	3	C3	CFB	PROS1
PROTEIN_COMPLEX_ASSEMBLY	PROTEIN_COMPLEX_ASSEMBLY	0.000152372	0.0122963	387	162	7	AGRN	APOE	FAS	GJC1	MAP3K11	MUC20	TP53
PROTEIN_OLIGOMERIZATION	PROTEIN_OLIGOMERIZATION	0.000157242	0.0122963	387	39	4	APOE	MAP3K11	MUC20	TP53
REACTOME_CELL_JUNCTION_ORGANIZATION	REACTOME_CELL_JUNCTION_ORGANIZATION	0.000152465	0.0122963	387	72	5	CDH1	CLDN1	CLDN3	FBLIM1	ITGB4
KEGG_BLADDER_CANCER	KEGG_BLADDER_CANCER	0.000173757	0.0124819	387	40	4	CDH1	EGFR	FGFR3	TP53
KEGG_STEROID_BIOSYNTHESIS	KEGG_STEROID_BIOSYNTHESIS	0.000175577	0.0124819	387	16	3	CYP27B1	LSS	TM7SF2
NEURON_DIFFERENTIATION	NEURON_DIFFERENTIATION	0.000173551	0.0124819	387	74	5	AGRN	APOE	DTX1	FEZ1	SMARCA1
REGULATION_OF_HYDROLASE_ACTIVITY	REGULATION_OF_HYDROLASE_ACTIVITY	0.000196792	0.0135787	387	76	5	ANGPTL4	EGFR	IFI6	SFN	TP53
CELL_JUNCTION	CELL_JUNCTION	0.00023601	0.0158194	387	79	5	AMOTL1	CDH1	CLDN1	CLDN3	GJB2
GENERATION_OF_NEURONS	GENERATION_OF_NEURONS	0.000265276	0.0159574	387	81	5	AGRN	APOE	DTX1	FEZ1	SMARCA1
KEGG_CALCIUM_SIGNALING_PATHWAY	KEGG_CALCIUM_SIGNALING_PATHWAY	0.000253225	0.0159574	387	176	7	EGFR	GNA14	GRPR	PLCB3	PLCD3	PTGER3	SPHK1
SYNAPTOGENESIS	SYNAPTOGENESIS	0.000253207	0.0159574	387	18	3	PCDHB11	PCDHB5	PCDHB9
TRANSMEMBRANE_RECEPTOR_PROTEIN_TYROSINE_KINASE_SIGNALING_PATHWAY	TRANSMEMBRANE_RECEPTOR_PROTEIN_TYROSINE_KINASE_SIGNALING_PATHWAY	0.000265276	0.0159574	387	81	5	AGRN	EGFR	FGFR3	FLT4	IGF2
CELL_CELL_ADHESION	CELL_CELL_ADHESION	0.000297216	0.0170066	387	83	5	AMIGO2	CLDN1	CLDN3	EGFR	NCAM2
REACTOME_EXTRACELLULAR_MATRIX_ORGANIZATION	REACTOME_EXTRACELLULAR_MATRIX_ORGANIZATION	0.000297216	0.0170066	387	83	5	COL5A1	COL6A2	PLOD2	TIMP1	TIMP2
KEGG_ECM_RECEPTOR_INTERACTION	KEGG_ECM_RECEPTOR_INTERACTION	0.000314239	0.0175525	387	84	5	AGRN	CD36	COL5A1	COL6A2	ITGB4
KEGG_HEMATOPOIETIC_CELL_LINEAGE	KEGG_HEMATOPOIETIC_CELL_LINEAGE	0.000331989	0.0177011	387	85	5	CD36	CD37	HLA-DRB1	HLA-DRB5	KIT
REACTOME_CELL_SURFACE_INTERACTIONS_AT_THE_VASCULAR_WALL	REACTOME_CELL_SURFACE_INTERACTIONS_AT_THE_VASCULAR_WALL	0.000331989	0.0177011	387	85	5	CAV1	GRB14	LYN	PROS1	SIRPA
REACTOME_PACKAGING_OF_TELOMERE_ENDS	REACTOME_PACKAGING_OF_TELOMERE_ENDS	0.000354075	0.0184591	387	48	4	HIST1H2BC	HIST1H2BK	HIST2H2AA4	HIST2H4A
REACTOME_CHOLESTEROL_BIOSYNTHESIS	REACTOME_CHOLESTEROL_BIOSYNTHESIS	0.000406352	0.020724	387	21	3	LSS	MVD	TM7SF2
NEGATIVE_REGULATION_OF_DEVELOPMENTAL_PROCESS	NEGATIVE_REGULATION_OF_DEVELOPMENTAL_PROCESS	0.000441443	0.0220346	387	193	7	AMIGO2	ANGPTL4	DTX1	FAS	IFI6	SPHK1	SPINK5
NEUROGENESIS	NEUROGENESIS	0.000454931	0.0222347	387	91	5	AGRN	APOE	DTX1	FEZ1	SMARCA1
KEGG_ENDOMETRIAL_CANCER	KEGG_ENDOMETRIAL_CANCER	0.000481965	0.0230753	387	52	4	CDH1	EGFR	TCF7L1	TP53
KEGG_FC_GAMMA_R_MEDIATED_PHAGOCYTOSIS	KEGG_FC_GAMMA_R_MEDIATED_PHAGOCYTOSIS	0.000502679	0.0235857	387	93	5	GSN	LYN	PLD1	SCIN	SPHK1
BIOCARTA_PTDINS_PATHWAY	BIOCARTA_PTDINS_PATHWAY	0.000535529	0.0246343	387	23	3	AP2M1	LYN	PFKP
CELLULAR_DEFENSE_RESPONSE	CELLULAR_DEFENSE_RESPONSE	0.000597289	0.0269469	387	55	4	DCDC2	GAGE1	MICB	NCF2
KEGG_MELANOGENESIS	KEGG_MELANOGENESIS	0.000732192	0.0324098	387	101	5	KIT	MC1R	PLCB3	TCF7L1	TYRP1
APOPTOTIC_PROGRAM	APOPTOTIC_PROGRAM	0.000779825	0.0332631	387	59	4	IFI6	PDIA2	SFN	TP53
REGULATION_OF_ANGIOGENESIS	REGULATION_OF_ANGIOGENESIS	0.00077413	0.0332631	387	26	3	ANGPTL4	SPHK1	SPINK5
REACTOME_INTERFERON_GAMMA_SIGNALING	REACTOME_INTERFERON_GAMMA_SIGNALING	0.000830976	0.0348119	387	60	4	HLA-DRB1	HLA-DRB5	ICAM1	OAS3
REACTOME_DEPOSITION_OF_NEW_CENPA_CONTAINING_NUCLEOSOMES_AT_THE_CENTROMERE	REACTOME_DEPOSITION_OF_NEW_CENPA_CONTAINING_NUCLEOSOMES_AT_THE_CENTROMERE	0.000884446	0.0352839	387	61	4	HIST1H2BC	HIST1H2BK	HIST2H2AA4	HIST2H4A
REACTOME_GAP_JUNCTION_TRAFFICKING	REACTOME_GAP_JUNCTION_TRAFFICKING	0.000866416	0.0352839	387	27	3	AP2M1	GJB2	GJC1
REGULATION_OF_CELLULAR_PROTEIN_METABOLIC_PROCESS	REGULATION_OF_CELLULAR_PROTEIN_METABOLIC_PROCESS	0.000887361	0.0352839	387	158	6	EGFR	GSN	IGF2BP2	LYN	SAMD4A	TIMP1
PEPTIDYL_AMINO_ACID_MODIFICATION	PEPTIDYL_AMINO_ACID_MODIFICATION	0.000940295	0.0367655	387	62	4	EGFR	IVL	LYN	PDF
RESPONSE_TO_HYPOXIA	RESPONSE_TO_HYPOXIA	0.000965397	0.0371282	387	28	3	CLDN3	PDIA2	PLOD2
KEGG_THYROID_CANCER	KEGG_THYROID_CANCER	0.00107125	0.0392681	387	29	3	CDH1	TCF7L1	TP53
LIPID_RAFT	LIPID_RAFT	0.00107125	0.0392681	387	29	3	CAV1	CAV2	LYN
REACTOME_COMPLEMENT_CASCADE	REACTOME_COMPLEMENT_CASCADE	0.00107125	0.0392681	387	29	3	C3	CFB	PROS1
CYTOPLASMIC_MEMBRANE_BOUND_VESICLE	CYTOPLASMIC_MEMBRANE_BOUND_VESICLE	0.0011196	0.0399061	387	111	5	CAV2	CRISP3	CRISPLD2	EGFR	SPINK5
REACTOME_ANTIVIRAL_MECHANISM_BY_IFN_STIMULATED_GENES	REACTOME_ANTIVIRAL_MECHANISM_BY_IFN_STIMULATED_GENES	0.00112268	0.0399061	387	65	4	HERC5	IFIT1	ISG15	MX1
JAK_STAT_CASCADE	JAK_STAT_CASCADE	0.00118417	0.0414635	387	30	3	FGFR3	LYN	STAT5A
MEMBRANE_BOUND_VESICLE	MEMBRANE_BOUND_VESICLE	0.0012124	0.0418278	387	113	5	CAV2	CRISP3	CRISPLD2	EGFR	SPINK5
REGULATION_OF_PROTEIN_METABOLIC_PROCESS	REGULATION_OF_PROTEIN_METABOLIC_PROCESS	0.00125483	0.0426643	387	169	6	EGFR	GSN	IGF2BP2	LYN	SAMD4A	TIMP1
CYTOPLASMIC_VESICLE	CYTOPLASMIC_VESICLE	0.00131077	0.0426943	387	115	5	CAV2	CRISP3	CRISPLD2	EGFR	SPINK5
KEGG_LEUKOCYTE_TRANSENDOTHELIAL_MIGRATION	KEGG_LEUKOCYTE_TRANSENDOTHELIAL_MIGRATION	0.00131077	0.0426943	387	115	5	CLDN1	CLDN3	ICAM1	MYL9	NCF2
KEGG_VIRAL_MYOCARDITIS	KEGG_VIRAL_MYOCARDITIS	0.00132851	0.0426943	387	68	4	CAV1	HLA-DRB1	HLA-DRB5	ICAM1
TIGHT_JUNCTION	TIGHT_JUNCTION	0.00130431	0.0426943	387	31	3	AMOTL1	CLDN1	CLDN3
RESPONSE_TO_HORMONE_STIMULUS	RESPONSE_TO_HORMONE_STIMULUS	0.00143184	0.0453933	387	32	3	CALCR	LATS2	LYN
KEGG_LEISHMANIA_INFECTION	KEGG_LEISHMANIA_INFECTION	0.00147952	0.0462794	387	70	4	C3	HLA-DRB1	HLA-DRB5	NCF2
EPIDERMIS_DEVELOPMENT	EPIDERMIS_DEVELOPMENT	0.00155933	0.047509	387	71	4	KRT13	KRT15	KRT16	SPINK5
REACTOME_MEIOTIC_SYNAPSIS	REACTOME_MEIOTIC_SYNAPSIS	0.00155933	0.047509	387	71	4	HIST1H2BC	HIST1H2BK	HIST2H2AA4	HIST2H4A
VESICLE	VESICLE	0.00158235	0.0475924	387	120	5	CAV2	CRISP3	CRISPLD2	EGFR	SPINK5
APICAL_JUNCTION_COMPLEX	APICAL_JUNCTION_COMPLEX	0.00170976	0.0501388	387	34	3	AMOTL1	CLDN1	CLDN3
APICOLATERAL_PLASMA_MEMBRANE	APICOLATERAL_PLASMA_MEMBRANE	0.00170976	0.0501388	387	34	3	AMOTL1	CLDN1	CLDN3
KEGG_ALLOGRAFT_REJECTION	KEGG_ALLOGRAFT_REJECTION	0.00186046	0.0538845	387	35	3	FAS	HLA-DRB1	HLA-DRB5
REACTOME_TELOMERE_MAINTENANCE	REACTOME_TELOMERE_MAINTENANCE	0.0019086	0.0546045	387	75	4	HIST1H2BC	HIST1H2BK	HIST2H2AA4	HIST2H4A
GROWTH	GROWTH	0.00210202	0.056038	387	77	4	DCBLD2	SPHK1	SPINK5	TP53
POSITIVE_REGULATION_OF_ANGIOGENESIS	POSITIVE_REGULATION_OF_ANGIOGENESIS	0.00209886	0.056038	387	10	2	ANGPTL4	SPHK1
POSITIVE_REGULATION_OF_CELL_MIGRATION	POSITIVE_REGULATION_OF_CELL_MIGRATION	0.00209886	0.056038	387	10	2	EGFR	SPHK1
PROTEIN_HETERODIMERIZATION_ACTIVITY	PROTEIN_HETERODIMERIZATION_ACTIVITY	0.0020037	0.056038	387	76	4	APOE	EGFR	TP53	TYRP1
REACTOME_FACTORS_INVOLVED_IN_MEGAKARYOCYTE_DEVELOPMENT_AND_PLATELET_PRODUCTION	REACTOME_FACTORS_INVOLVED_IN_MEGAKARYOCYTE_DEVELOPMENT_AND_PLATELET_PRODUCTION	0.00209982	0.056038	387	128	5	HIST1H3H	HIST2H3A	HIST2H3C	TP53	ZFPM2
REACTOME_REGULATION_OF_INSULIN_SECRETION_BY_ACETYLCHOLINE	REACTOME_REGULATION_OF_INSULIN_SECRETION_BY_ACETYLCHOLINE	0.00209886	0.056038	387	10	2	GNA14	PLCB3
KEGG_GRAFT_VERSUS_HOST_DISEASE	KEGG_GRAFT_VERSUS_HOST_DISEASE	0.00218609	0.056984	387	37	3	FAS	HLA-DRB1	HLA-DRB5
REACTOME_APOPTOTIC_CLEAVAGE_OF_CELLULAR_PROTEINS	REACTOME_APOPTOTIC_CLEAVAGE_OF_CELLULAR_PROTEINS	0.00218609	0.056984	387	37	3	CDH1	GSN	PKP1
ECTODERM_DEVELOPMENT	ECTODERM_DEVELOPMENT	0.00241689	0.0623081	387	80	4	KRT13	KRT15	KRT16	SPINK5
APOPTOTIC_MITOCHONDRIAL_CHANGES	APOPTOTIC_MITOCHONDRIAL_CHANGES	0.00255348	0.0630575	387	11	2	IFI6	SFN
BIOCARTA_BLYMPHOCYTE_PATHWAY	BIOCARTA_BLYMPHOCYTE_PATHWAY	0.00255348	0.0630575	387	11	2	HLA-DRB1	ICAM1
REACTOME_APOPTOTIC_CLEAVAGE_OF_CELL_ADHESION_PROTEINS	REACTOME_APOPTOTIC_CLEAVAGE_OF_CELL_ADHESION_PROTEINS	0.00255348	0.0630575	387	11	2	CDH1	PKP1
REACTOME_NCAM1_INTERACTIONS	REACTOME_NCAM1_INTERACTIONS	0.00254498	0.0630575	387	39	3	AGRN	COL5A1	COL6A2
TISSUE_DEVELOPMENT	TISSUE_DEVELOPMENT	0.00281851	0.0688772	387	137	5	KRT13	KRT15	KRT16	RUNX2	SPINK5
ENZYME_LINKED_RECEPTOR_PROTEIN_SIGNALING_PATHWAY	ENZYME_LINKED_RECEPTOR_PROTEIN_SIGNALING_PATHWAY	0.00290807	0.0703333	387	138	5	AGRN	EGFR	FGFR3	FLT4	IGF2
KEGG_TYPE_I_DIABETES_MELLITUS	KEGG_TYPE_I_DIABETES_MELLITUS	0.00293822	0.0703373	387	41	3	FAS	HLA-DRB1	HLA-DRB5
BIOCARTA_ASBCELL_PATHWAY	BIOCARTA_ASBCELL_PATHWAY	0.00305009	0.0722779	387	12	2	FAS	HLA-DRB1
LIPID_BINDING	LIPID_BINDING	0.00314106	0.0736893	387	86	4	APOE	CAV1	RASAL1	SCIN
REACTOME_APOPTOSIS	REACTOME_APOPTOSIS	0.00338696	0.0779002	387	143	5	CDH1	FAS	GSN	PKP1	TP53
TRANSMEMBRANE_RECEPTOR_PROTEIN_TYROSINE_KINASE_ACTIVITY	TRANSMEMBRANE_RECEPTOR_PROTEIN_TYROSINE_KINASE_ACTIVITY	0.00336683	0.0779002	387	43	3	EGFR	FLT4	PTK7
AGING	AGING	0.00358809	0.0786698	387	13	2	TBX2	TP53
BIOCARTA_CTL_PATHWAY	BIOCARTA_CTL_PATHWAY	0.00358809	0.0786698	387	13	2	FAS	ICAM1
PROTEIN_TETRAMERIZATION	PROTEIN_TETRAMERIZATION	0.00358809	0.0786698	387	13	2	APOE	TP53
REACTOME_INITIAL_TRIGGERING_OF_COMPLEMENT	REACTOME_INITIAL_TRIGGERING_OF_COMPLEMENT	0.00358809	0.0786698	387	13	2	C3	CFB
REACTOME_TRANSLOCATION_OF_ZAP_70_TO_IMMUNOLOGICAL_SYNAPSE	REACTOME_TRANSLOCATION_OF_ZAP_70_TO_IMMUNOLOGICAL_SYNAPSE	0.00358809	0.0786698	387	13	2	HLA-DRB1	HLA-DRB5
ANGIOGENESIS	ANGIOGENESIS	0.00407818	0.0831949	387	46	3	ANGPTL4	SPHK1	SPINK5
CELL_MIGRATION	CELL_MIGRATION	0.00384751	0.0831949	387	91	4	EGFR	ENPEP	FEZ1	SPHK1
KEGG_INTESTINAL_IMMUNE_NETWORK_FOR_IGA_PRODUCTION	KEGG_INTESTINAL_IMMUNE_NETWORK_FOR_IGA_PRODUCTION	0.00407818	0.0831949	387	46	3	CCL28	HLA-DRB1	HLA-DRB5
KEGG_WNT_SIGNALING_PATHWAY	KEGG_WNT_SIGNALING_PATHWAY	0.0040335	0.0831949	387	149	5	DKK1	NFATC2	PLCB3	TCF7L1	TP53
NEGATIVE_REGULATION_OF_PROGRAMMED_CELL_DEATH	NEGATIVE_REGULATION_OF_PROGRAMMED_CELL_DEATH	0.00392008	0.0831949	387	148	5	AMIGO2	ANGPTL4	FAS	IFI6	SPHK1
PHOSPHOLIPID_BINDING	PHOSPHOLIPID_BINDING	0.00407818	0.0831949	387	46	3	APOE	RASAL1	SCIN
REGULATION_OF_CELL_GROWTH	REGULATION_OF_CELL_GROWTH	0.00407818	0.0831949	387	46	3	DCBLD2	SPHK1	TP53
REGULATION_OF_PROTEIN_KINASE_ACTIVITY	REGULATION_OF_PROTEIN_KINASE_ACTIVITY	0.0040335	0.0831949	387	149	5	EGFR	HERC5	LATS2	MAP3K11	SFN
DNA_DAMAGE_RESPONSESIGNAL_TRANSDUCTION_RESULTING_IN_INDUCTION_OF_APOPTOSIS	DNA_DAMAGE_RESPONSESIGNAL_TRANSDUCTION_RESULTING_IN_INDUCTION_OF_APOPTOSIS	0.00416689	0.0835515	387	14	2	SFN	TP53
REACTOME_SYNTHESIS_OF_VERY_LONG_CHAIN_FATTY_ACYL_COAS	REACTOME_SYNTHESIS_OF_VERY_LONG_CHAIN_FATTY_ACYL_COAS	0.00416689	0.0835515	387	14	2	ELOVL3	HSD17B12
MITOCHONDRION_ORGANIZATION_AND_BIOGENESIS	MITOCHONDRION_ORGANIZATION_AND_BIOGENESIS	0.00433399	0.0840292	387	47	3	IFI6	SFN	TP53
REACTOME_CHONDROITIN_SULFATE_DERMATAN_SULFATE_METABOLISM	REACTOME_CHONDROITIN_SULFATE_DERMATAN_SULFATE_METABOLISM	0.00433399	0.0840292	387	47	3	AGRN	CHST11	CHST3
REACTOME_MUSCLE_CONTRACTION	REACTOME_MUSCLE_CONTRACTION	0.00433399	0.0840292	387	47	3	ACTA2	MYL9	TNNI2
REGULATION_OF_KINASE_ACTIVITY	REGULATION_OF_KINASE_ACTIVITY	0.00426733	0.0840292	387	151	5	EGFR	HERC5	LATS2	MAP3K11	SFN
NITROGEN_COMPOUND_METABOLIC_PROCESS	NITROGEN_COMPOUND_METABOLIC_PROCESS	0.00451067	0.0867381	387	153	5	CHST11	CHST3	EGFR	SLC6A14	SPHK1
CALCIUM_MEDIATED_SIGNALING	CALCIUM_MEDIATED_SIGNALING	0.00478589	0.0884071	387	15	2	EGFR	SPHK1
PROTEOGLYCAN_BIOSYNTHETIC_PROCESS	PROTEOGLYCAN_BIOSYNTHETIC_PROCESS	0.00478589	0.0884071	387	15	2	CHST11	CHST3
REACTOME_OTHER_SEMAPHORIN_INTERACTIONS	REACTOME_OTHER_SEMAPHORIN_INTERACTIONS	0.00478589	0.0884071	387	15	2	SEMA6A	SEMA7A
REACTOME_PHOSPHORYLATION_OF_CD3_AND_TCR_ZETA_CHAINS	REACTOME_PHOSPHORYLATION_OF_CD3_AND_TCR_ZETA_CHAINS	0.00478589	0.0884071	387	15	2	HLA-DRB1	HLA-DRB5
REGULATION_OF_TRANSFERASE_ACTIVITY	REGULATION_OF_TRANSFERASE_ACTIVITY	0.00476373	0.0884071	387	155	5	EGFR	HERC5	LATS2	MAP3K11	SFN
ADENYL_RIBONUCLEOTIDE_BINDING	ADENYL_RIBONUCLEOTIDE_BINDING	0.00529981	0.0933845	387	159	5	ABCG2	APRT	LATS2	SPHK1	TP53
BIOCARTA_LAIR_PATHWAY	BIOCARTA_LAIR_PATHWAY	0.00544451	0.0933845	387	16	2	C3	ICAM1
BRAIN_DEVELOPMENT	BRAIN_DEVELOPMENT	0.00515893	0.0933845	387	50	3	PBX3	SMARCA1	ZIC1
CYTOSKELETAL_PROTEIN_BINDING	CYTOSKELETAL_PROTEIN_BINDING	0.00529981	0.0933845	387	159	5	APOE	COTL1	EGFR	RHCG	SCIN
KEGG_AUTOIMMUNE_THYROID_DISEASE	KEGG_AUTOIMMUNE_THYROID_DISEASE	0.00515893	0.0933845	387	50	3	FAS	HLA-DRB1	HLA-DRB5
LIPID_HOMEOSTASIS	LIPID_HOMEOSTASIS	0.00544451	0.0933845	387	16	2	APOE	CAV1
REACTOME_APOPTOTIC_EXECUTION_PHASE	REACTOME_APOPTOTIC_EXECUTION_PHASE	0.0054534	0.0933845	387	51	3	CDH1	GSN	PKP1
REACTOME_CELL_CELL_JUNCTION_ORGANIZATION	REACTOME_CELL_CELL_JUNCTION_ORGANIZATION	0.0054534	0.0933845	387	51	3	CDH1	CLDN1	CLDN3
REACTOME_REGULATION_OF_KIT_SIGNALING	REACTOME_REGULATION_OF_KIT_SIGNALING	0.00544451	0.0933845	387	16	2	KIT	LYN
TRANSMEMBRANE_RECEPTOR_PROTEIN_KINASE_ACTIVITY	TRANSMEMBRANE_RECEPTOR_PROTEIN_KINASE_ACTIVITY	0.0054534	0.0933845	387	51	3	EGFR	FLT4	PTK7
SKELETAL_DEVELOPMENT	SKELETAL_DEVELOPMENT	0.00556791	0.0946544	387	101	4	FGFR3	IGF2	RUNX2	TNFRSF11B
ADENYL_NUCLEOTIDE_BINDING	ADENYL_NUCLEOTIDE_BINDING	0.00618189	0.0986579	387	165	5	ABCG2	APRT	LATS2	SPHK1	TP53
BIOCARTA_ARF_PATHWAY	BIOCARTA_ARF_PATHWAY	0.00614216	0.0986579	387	17	2	TBX2	TP53
BIOCARTA_PML_PATHWAY	BIOCARTA_PML_PATHWAY	0.00614216	0.0986579	387	17	2	FAS	TP53
CALCIUM_ION_BINDING	CALCIUM_ION_BINDING	0.00596448	0.0986579	387	103	4	GSN	S100A9	SCIN	TCHH
PERINUCLEAR_REGION_OF_CYTOPLASM	PERINUCLEAR_REGION_OF_CYTOPLASM	0.00607213	0.0986579	387	53	3	CAV2	CDH1	SPINK5
REACTOME_PD1_SIGNALING	REACTOME_PD1_SIGNALING	0.00614216	0.0986579	387	17	2	HLA-DRB1	HLA-DRB5
REGULATION_OF_PEPTIDYL_TYROSINE_PHOSPHORYLATION	REGULATION_OF_PEPTIDYL_TYROSINE_PHOSPHORYLATION	0.00614216	0.0986579	387	17	2	EGFR	LYN
VASCULATURE_DEVELOPMENT	VASCULATURE_DEVELOPMENT	0.00607213	0.0986579	387	53	3	ANGPTL4	SPHK1	SPINK5
WOUND_HEALING	WOUND_HEALING	0.00607213	0.0986579	387	53	3	CD36	DCBLD2	PROS1
ANATOMICAL_STRUCTURE_FORMATION	ANATOMICAL_STRUCTURE_FORMATION	0.00639656	0.100714	387	54	3	ANGPTL4	SPHK1	SPINK5
REACTOME_COLLAGEN_FORMATION	REACTOME_COLLAGEN_FORMATION	0.00639656	0.100714	387	54	3	COL5A1	COL6A2	PLOD2
BIOCARTA_TEL_PATHWAY	BIOCARTA_TEL_PATHWAY	0.00687828	0.103439	387	18	2	EGFR	TP53
DEVELOPMENTAL_MATURATION	DEVELOPMENTAL_MATURATION	0.00687828	0.103439	387	18	2	AGRN	SPINK5
KEGG_BASAL_CELL_CARCINOMA	KEGG_BASAL_CELL_CARCINOMA	0.00673113	0.103439	387	55	3	SMO	TCF7L1	TP53
REACTOME_FATTY_ACYL_COA_BIOSYNTHESIS	REACTOME_FATTY_ACYL_COA_BIOSYNTHESIS	0.00687828	0.103439	387	18	2	ELOVL3	HSD17B12
REACTOME_GAP_JUNCTION_ASSEMBLY	REACTOME_GAP_JUNCTION_ASSEMBLY	0.00687828	0.103439	387	18	2	GJB2	GJC1
SECRETORY_GRANULE	SECRETORY_GRANULE	0.00687828	0.103439	387	18	2	CRISP3	SPINK5
SULFUR_COMPOUND_BIOSYNTHETIC_PROCESS	SULFUR_COMPOUND_BIOSYNTHETIC_PROCESS	0.00687828	0.103439	387	18	2	CHST11	CHST3
KEGG_ACUTE_MYELOID_LEUKEMIA	KEGG_ACUTE_MYELOID_LEUKEMIA	0.00743102	0.111039	387	57	3	KIT	STAT5A	TCF7L1
BIOCARTA_COMP_PATHWAY	BIOCARTA_COMP_PATHWAY	0.0076523	0.111505	387	19	2	C3	CFB
BIOCARTA_TID_PATHWAY	BIOCARTA_TID_PATHWAY	0.0076523	0.111505	387	19	2	TAX1BP3	TP53
REACTOME_CHONDROITIN_SULFATE_BIOSYNTHESIS	REACTOME_CHONDROITIN_SULFATE_BIOSYNTHESIS	0.0076523	0.111505	387	19	2	CHST11	CHST3
REGULATION_OF_MUSCLE_CONTRACTION	REGULATION_OF_MUSCLE_CONTRACTION	0.0076523	0.111505	387	19	2	MYL9	SPHK1
REGULATION_OF_GROWTH	REGULATION_OF_GROWTH	0.00779648	0.112905	387	58	3	DCBLD2	SPHK1	TP53
REACTOME_PEPTIDE_LIGAND_BINDING_RECEPTORS	REACTOME_PEPTIDE_LIGAND_BINDING_RECEPTORS	0.0078732	0.113316	387	175	5	C3	CCL28	CXCL16	GRPR	MC1R
KEGG_ENDOCYTOSIS	KEGG_ENDOCYTOSIS	0.0080583	0.115273	387	176	5	AP2M1	EGFR	FGFR3	KIT	PLD1
NEURON_DEVELOPMENT	NEURON_DEVELOPMENT	0.00817237	0.115496	387	59	3	AGRN	APOE	FEZ1
REGULATION_OF_CELL_DIFFERENTIATION	REGULATION_OF_CELL_DIFFERENTIATION	0.00817237	0.115496	387	59	3	DTX1	SCIN	SPINK5
PROTEOGLYCAN_METABOLIC_PROCESS	PROTEOGLYCAN_METABOLIC_PROCESS	0.00846365	0.118189	387	20	2	CHST11	CHST3
REACTOME_SIGNALING_BY_HIPPO	REACTOME_SIGNALING_BY_HIPPO	0.00846365	0.118189	387	20	2	AMOTL1	LATS2
REACTOME_COSTIMULATION_BY_THE_CD28_FAMILY	REACTOME_COSTIMULATION_BY_THE_CD28_FAMILY	0.00895571	0.12432	387	61	3	HLA-DRB1	HLA-DRB5	LYN
REACTOME_CHROMOSOME_MAINTENANCE	REACTOME_CHROMOSOME_MAINTENANCE	0.00927379	0.127978	387	117	4	HIST1H2BC	HIST1H2BK	HIST2H2AA4	HIST2H4A
CENTRAL_NERVOUS_SYSTEM_DEVELOPMENT	CENTRAL_NERVOUS_SYSTEM_DEVELOPMENT	0.00982668	0.134815	387	119	4	PBX3	PCP4	SMARCA1	ZIC1
CALCIUM_INDEPENDENT_CELL_CELL_ADHESION	CALCIUM_INDEPENDENT_CELL_CELL_ADHESION	0.0101962	0.136879	387	22	2	CLDN1	CLDN3
KEGG_GLYCOSAMINOGLYCAN_BIOSYNTHESIS_CHONDROITIN_SULFATE	KEGG_GLYCOSAMINOGLYCAN_BIOSYNTHESIS_CHONDROITIN_SULFATE	0.0101962	0.136879	387	22	2	CHST11	CHST3
REACTOME_NCAM_SIGNALING_FOR_NEURITE_OUT_GROWTH	REACTOME_NCAM_SIGNALING_FOR_NEURITE_OUT_GROWTH	0.0102105	0.136879	387	64	3	AGRN	COL5A1	COL6A2
SENSORY_PERCEPTION	SENSORY_PERCEPTION	0.010078	0.136879	387	186	5	EFEMP1	GJB2	KCNQ4	KIFC3	TGFBI
KEGG_P53_SIGNALING_PATHWAY	KEGG_P53_SIGNALING_PATHWAY	0.0106502	0.141962	387	65	3	FAS	SFN	TP53
BIOCARTA_RAC1_PATHWAY	BIOCARTA_RAC1_PATHWAY	0.0111162	0.144881	387	23	2	NCF2	PLD1
INDUCTION_OF_APOPTOSIS_BY_INTRACELLULAR_SIGNALS	INDUCTION_OF_APOPTOSIS_BY_INTRACELLULAR_SIGNALS	0.0111162	0.144881	387	23	2	SFN	TP53
RAS_PROTEIN_SIGNAL_TRANSDUCTION	RAS_PROTEIN_SIGNAL_TRANSDUCTION	0.0111008	0.144881	387	66	3	APOE	PLD1	TAX1BP3
REACTOME_SEMAPHORIN_INTERACTIONS	REACTOME_SEMAPHORIN_INTERACTIONS	0.0111008	0.144881	387	66	3	MYL9	SEMA6A	SEMA7A
CALMODULIN_BINDING	CALMODULIN_BINDING	0.0120714	0.14905	387	24	2	NRGN	SPHK1
INTERMEDIATE_FILAMENT	INTERMEDIATE_FILAMENT	0.0120714	0.14905	387	24	2	KRT15	PKP1
INTERMEDIATE_FILAMENT_CYTOSKELETON	INTERMEDIATE_FILAMENT_CYTOSKELETON	0.0120714	0.14905	387	24	2	KRT15	PKP1
KEGG_ADHERENS_JUNCTION	KEGG_ADHERENS_JUNCTION	0.0120345	0.14905	387	68	3	CDH1	EGFR	TCF7L1
LYASE_ACTIVITY	LYASE_ACTIVITY	0.0115622	0.14905	387	67	3	ACCS	CBS	MVD
PROTEIN_KINASE_INHIBITOR_ACTIVITY	PROTEIN_KINASE_INHIBITOR_ACTIVITY	0.0120714	0.14905	387	24	2	PKIA	SFN
REACTOME_DIABETES_PATHWAYS	REACTOME_DIABETES_PATHWAYS	0.0119287	0.14905	387	126	4	BCHE	IGF2	IGF2BP2	MBTPS1
REACTOME_GROWTH_HORMONE_RECEPTOR_SIGNALING	REACTOME_GROWTH_HORMONE_RECEPTOR_SIGNALING	0.0120714	0.14905	387	24	2	LYN	STAT5A
REACTOME_SMOOTH_MUSCLE_CONTRACTION	REACTOME_SMOOTH_MUSCLE_CONTRACTION	0.0120714	0.14905	387	24	2	ACTA2	MYL9
RESPONSE_TO_ENDOGENOUS_STIMULUS	RESPONSE_TO_ENDOGENOUS_STIMULUS	0.0116823	0.14905	387	193	5	CALCR	LATS2	LYN	SFN	TP53
KEGG_COMPLEMENT_AND_COAGULATION_CASCADES	KEGG_COMPLEMENT_AND_COAGULATION_CASCADES	0.0125178	0.152892	387	69	3	C3	CFB	PROS1
KEGG_PANCREATIC_CANCER	KEGG_PANCREATIC_CANCER	0.0125178	0.152892	387	69	3	EGFR	PLD1	TP53
KEGG_TIGHT_JUNCTION	KEGG_TIGHT_JUNCTION	0.0125781	0.152892	387	128	4	AMOTL1	CLDN1	CLDN3	MYL9
ACTIN_FILAMENT_BINDING	ACTIN_FILAMENT_BINDING	0.0130613	0.153209	387	25	2	EGFR	SCIN
KINASE_INHIBITOR_ACTIVITY	KINASE_INHIBITOR_ACTIVITY	0.0130613	0.153209	387	25	2	PKIA	SFN
LIGAND_DEPENDENT_NUCLEAR_RECEPTOR_ACTIVITY	LIGAND_DEPENDENT_NUCLEAR_RECEPTOR_ACTIVITY	0.0130613	0.153209	387	25	2	PGR	PTGER3
POSITIVE_REGULATION_OF_PHOSPHORYLATION	POSITIVE_REGULATION_OF_PHOSPHORYLATION	0.0130613	0.153209	387	25	2	EGFR	LYN
REACTOME_EGFR_DOWNREGULATION	REACTOME_EGFR_DOWNREGULATION	0.0130613	0.153209	387	25	2	AP2M1	EGFR
REACTOME_GENERATION_OF_SECOND_MESSENGER_MOLECULES	REACTOME_GENERATION_OF_SECOND_MESSENGER_MOLECULES	0.0130613	0.153209	387	25	2	HLA-DRB1	HLA-DRB5
SERINE_TYPE_ENDOPEPTIDASE_INHIBITOR_ACTIVITY	SERINE_TYPE_ENDOPEPTIDASE_INHIBITOR_ACTIVITY	0.0130613	0.153209	387	25	2	SERPINA6	SPINK5
REACTOME_PLATELET_ACTIVATION_SIGNALING_AND_AGGREGATION	REACTOME_PLATELET_ACTIVATION_SIGNALING_AND_AGGREGATION	0.0131889	0.153936	387	199	5	CD36	GNA14	LYN	PROS1	TIMP1
KEGG_MELANOMA	KEGG_MELANOMA	0.0135173	0.156988	387	71	3	CDH1	EGFR	TP53
PEPTIDYL_TYROSINE_PHOSPHORYLATION	PEPTIDYL_TYROSINE_PHOSPHORYLATION	0.0140852	0.159632	387	26	2	EGFR	LYN
POSITIVE_REGULATION_OF_PHOSPHATE_METABOLIC_PROCESS	POSITIVE_REGULATION_OF_PHOSPHATE_METABOLIC_PROCESS	0.0140852	0.159632	387	26	2	EGFR	LYN
REACTOME_ASSOCIATION_OF_TRIC_CCT_WITH_TARGET_PROTEINS_DURING_BIOSYNTHESIS	REACTOME_ASSOCIATION_OF_TRIC_CCT_WITH_TARGET_PROTEINS_DURING_BIOSYNTHESIS	0.0140852	0.159632	387	26	2	KIFC3	SPHK1
REACTOME_PTM_GAMMA_CARBOXYLATION_HYPUSINE_FORMATION_AND_ARYLSULFATASE_ACTIVATION	REACTOME_PTM_GAMMA_CARBOXYLATION_HYPUSINE_FORMATION_AND_ARYLSULFATASE_ACTIVATION	0.0140852	0.159632	387	26	2	EIF5A2	PROS1
RESPONSE_TO_UV	RESPONSE_TO_UV	0.0140852	0.159632	387	26	2	IVL	MC1R
HEMOPOIESIS	HEMOPOIESIS	0.014561	0.164231	387	73	3	LYN	SCIN	SPINK5
MEMBRANE_ORGANIZATION_AND_BIOGENESIS	MEMBRANE_ORGANIZATION_AND_BIOGENESIS	0.015027	0.168677	387	135	4	AGRN	EGFR	FOLR1	TP53
REACTOME_AMINE_COMPOUND_SLC_TRANSPORTERS	REACTOME_AMINE_COMPOUND_SLC_TRANSPORTERS	0.0151427	0.169166	387	27	2	RHCG	SLC6A14
ACTIN_BINDING	ACTIN_BINDING	0.0162099	0.173106	387	76	3	COTL1	EGFR	SCIN
BIOCARTA_ERK_PATHWAY	BIOCARTA_ERK_PATHWAY	0.0162333	0.173106	387	28	2	EGFR	NGFR
HEMOPOIETIC_OR_LYMPHOID_ORGAN_DEVELOPMENT	HEMOPOIETIC_OR_LYMPHOID_ORGAN_DEVELOPMENT	0.0156491	0.173106	387	75	3	LYN	SCIN	SPINK5
KEGG_ASTHMA	KEGG_ASTHMA	0.0162333	0.173106	387	28	2	HLA-DRB1	HLA-DRB5
LIPID_TRANSPORT	LIPID_TRANSPORT	0.0162333	0.173106	387	28	2	APOE	CAV1
PEPTIDYL_TYROSINE_MODIFICATION	PEPTIDYL_TYROSINE_MODIFICATION	0.0162333	0.173106	387	28	2	EGFR	LYN
REACTOME_SIGNALING_BY_SCF_KIT	REACTOME_SIGNALING_BY_SCF_KIT	0.0156491	0.173106	387	75	3	KIT	LYN	STAT5A
REACTOME_TIGHT_JUNCTION_INTERACTIONS	REACTOME_TIGHT_JUNCTION_INTERACTIONS	0.0162333	0.173106	387	28	2	CLDN1	CLDN3
REGULATION_OF_CELL_MIGRATION	REGULATION_OF_CELL_MIGRATION	0.0162333	0.173106	387	28	2	EGFR	SPHK1
SULFOTRANSFERASE_ACTIVITY	SULFOTRANSFERASE_ACTIVITY	0.0162333	0.173106	387	28	2	CHST11	CHST3
AMINE_METABOLIC_PROCESS	AMINE_METABOLIC_PROCESS	0.016948	0.17991	387	140	4	CHST11	CHST3	SLC6A14	SPHK1
REACTOME_DEGRADATION_OF_THE_EXTRACELLULAR_MATRIX	REACTOME_DEGRADATION_OF_THE_EXTRACELLULAR_MATRIX	0.0173564	0.181867	387	29	2	TIMP1	TIMP2
REACTOME_INTEGRIN_CELL_SURFACE_INTERACTIONS	REACTOME_INTEGRIN_CELL_SURFACE_INTERACTIONS	0.0173649	0.181867	387	78	3	CDH1	ICAM1	ITGB4
REGULATION_OF_PROTEIN_AMINO_ACID_PHOSPHORYLATION	REGULATION_OF_PROTEIN_AMINO_ACID_PHOSPHORYLATION	0.0173564	0.181867	387	29	2	EGFR	LYN
ORGAN_MORPHOGENESIS	ORGAN_MORPHOGENESIS	0.0177574	0.18515	387	142	4	ANGPTL4	SPHK1	SPINK5	ZIC1
IMMUNE_SYSTEM_DEVELOPMENT	IMMUNE_SYSTEM_DEVELOPMENT	0.0179593	0.186427	387	79	3	LYN	SCIN	SPINK5
PATTERN_SPECIFICATION_PROCESS	PATTERN_SPECIFICATION_PROCESS	0.0185115	0.190474	387	30	2	PBX3	ZIC1
TRANSPORT_VESICLE	TRANSPORT_VESICLE	0.0185115	0.190474	387	30	2	CAV2	CRISPLD2
RECEPTOR_SIGNALING_PROTEIN_ACTIVITY	RECEPTOR_SIGNALING_PROTEIN_ACTIVITY	0.0191816	0.196506	387	81	3	KIT	LYN	MAP3K11
BIOCARTA_EGF_PATHWAY	BIOCARTA_EGF_PATHWAY	0.0196982	0.198335	387	31	2	EGFR	STAT5A
BIOCARTA_NO1_PATHWAY	BIOCARTA_NO1_PATHWAY	0.0196982	0.198335	387	31	2	CAV1	FLT4
KEGG_GLYCINE_SERINE_AND_THREONINE_METABOLISM	KEGG_GLYCINE_SERINE_AND_THREONINE_METABOLISM	0.0196982	0.198335	387	31	2	CBS	PSAT1
REACTOME_NEGATIVE_REGULATORS_OF_RIG_I_MDA5_SIGNALING	REACTOME_NEGATIVE_REGULATORS_OF_RIG_I_MDA5_SIGNALING	0.0196982	0.198335	387	31	2	HERC5	ISG15
NEGATIVE_REGULATION_OF_APOPTOSIS	NEGATIVE_REGULATION_OF_APOPTOSIS	0.0198847	0.198509	387	147	4	ANGPTL4	FAS	IFI6	SPHK1
REACTOME_RESPONSE_TO_ELEVATED_PLATELET_CYTOSOLIC_CA2_	REACTOME_RESPONSE_TO_ELEVATED_PLATELET_CYTOSOLIC_CA2_	0.0198096	0.198509	387	82	3	CD36	PROS1	TIMP1
BEHAVIOR	BEHAVIOR	0.0203282	0.202076	387	148	4	APOE	CCL28	PLD1	ZIC1
TRANSFERASE_ACTIVITY_TRANSFERRING_SULFUR_CONTAINING_GROUPS	TRANSFERASE_ACTIVITY_TRANSFERRING_SULFUR_CONTAINING_GROUPS	0.020916	0.207042	387	32	2	CHST11	CHST3
SECOND_MESSENGER_MEDIATED_SIGNALING	SECOND_MESSENGER_MEDIATED_SIGNALING	0.0216949	0.21385	387	151	4	CALCR	EGFR	MC1R	SPHK1
ATP_BINDING	ATP_BINDING	0.0221627	0.216656	387	152	4	ABCG2	LATS2	SPHK1	TP53
DNA_DAMAGE_RESPONSESIGNAL_TRANSDUCTION	DNA_DAMAGE_RESPONSESIGNAL_TRANSDUCTION	0.0221643	0.216656	387	33	2	SFN	TP53
KEGG_APOPTOSIS	KEGG_APOPTOSIS	0.0224341	0.218384	387	86	3	FAS	TNFRSF10C	TP53
ALCOHOL_METABOLIC_PROCESS	ALCOHOL_METABOLIC_PROCESS	0.0231184	0.222278	387	87	3	ALDH1A3	GFPT2	SPHK1
CHEMICAL_HOMEOSTASIS	CHEMICAL_HOMEOSTASIS	0.0231166	0.222278	387	154	4	APOE	CAV1	IFI6	RHCG
SMALL_GTPASE_MEDIATED_SIGNAL_TRANSDUCTION	SMALL_GTPASE_MEDIATED_SIGNAL_TRANSDUCTION	0.0231184	0.222278	387	87	3	APOE	PLD1	TAX1BP3
NEGATIVE_REGULATION_OF_TRANSFERASE_ACTIVITY	NEGATIVE_REGULATION_OF_TRANSFERASE_ACTIVITY	0.0234427	0.222658	387	34	2	LATS2	SFN
REACTOME_DOWNSTREAM_TCR_SIGNALING	REACTOME_DOWNSTREAM_TCR_SIGNALING	0.0234427	0.222658	387	34	2	HLA-DRB1	HLA-DRB5
REACTOME_SIGNAL_TRANSDUCTION_BY_L1	REACTOME_SIGNAL_TRANSDUCTION_BY_L1	0.0234427	0.222658	387	34	2	AP2M1	EGFR
REACTOME_MHC_CLASS_II_ANTIGEN_PRESENTATION	REACTOME_MHC_CLASS_II_ANTIGEN_PRESENTATION	0.0238139	0.22347	387	88	3	AP2M1	HLA-DRB1	HLA-DRB5
REACTOME_SIGNALING_BY_ERBB4	REACTOME_SIGNALING_BY_ERBB4	0.0238139	0.22347	387	88	3	EGFR	PGR	STAT5A
ZINC_ION_BINDING	ZINC_ION_BINDING	0.0238139	0.22347	387	88	3	MSRB3	TP53	ZFPM2
KEGG_PROSTATE_CANCER	KEGG_PROSTATE_CANCER	0.0245207	0.228276	387	89	3	EGFR	TCF7L1	TP53
REACTOME_TRANSPORT_OF_GLUCOSE_AND_OTHER_SUGARS_BILE_SALTS_AND_ORGANIC_ACIDS_METAL_IONS_AND_AMINE_COMPOUNDS	REACTOME_TRANSPORT_OF_GLUCOSE_AND_OTHER_SUGARS_BILE_SALTS_AND_ORGANIC_ACIDS_METAL_IONS_AND_AMINE_COMPOUNDS	0.0245207	0.228276	387	89	3	RHCG	SLC47A1	SLC6A14
BIOCARTA_BCR_PATHWAY	BIOCARTA_BCR_PATHWAY	0.0247507	0.228603	387	35	2	LYN	NFATC2
ISOMERASE_ACTIVITY	ISOMERASE_ACTIVITY	0.0247507	0.228603	387	35	2	LSS	PDIA2
MYELOID_CELL_DIFFERENTIATION	MYELOID_CELL_DIFFERENTIATION	0.0260879	0.238492	387	36	2	LYN	SCIN
POSITIVE_REGULATION_OF_CATALYTIC_ACTIVITY	POSITIVE_REGULATION_OF_CATALYTIC_ACTIVITY	0.0261264	0.238492	387	160	4	CALCR	EGFR	MAP3K11	TP53
REACTOME_TRIGLYCERIDE_BIOSYNTHESIS	REACTOME_TRIGLYCERIDE_BIOSYNTHESIS	0.0260879	0.238492	387	36	2	ELOVL3	HSD17B12
BIOCARTA_FMLP_PATHWAY	BIOCARTA_FMLP_PATHWAY	0.0274537	0.248673	387	37	2	NCF2	NFATC2
SULFUR_METABOLIC_PROCESS	SULFUR_METABOLIC_PROCESS	0.0274537	0.248673	387	37	2	CHST11	CHST3
BIOCARTA_IL2RB_PATHWAY	BIOCARTA_IL2RB_PATHWAY	0.0288477	0.255384	387	38	2	FAS	STAT5A
PROTEIN_KINASE_REGULATOR_ACTIVITY	PROTEIN_KINASE_REGULATOR_ACTIVITY	0.0288477	0.255384	387	38	2	PKIA	SFN
PROTEIN_N_TERMINUS_BINDING	PROTEIN_N_TERMINUS_BINDING	0.0288477	0.255384	387	38	2	PGR	TP53
REACTOME_FATTY_ACID_TRIACYLGLYCEROL_AND_KETONE_BODY_METABOLISM	REACTOME_FATTY_ACID_TRIACYLGLYCEROL_AND_KETONE_BODY_METABOLISM	0.028806	0.255384	387	165	4	ANGPTL4	CD36	ELOVL3	HSD17B12
REACTOME_NUCLEAR_SIGNALING_BY_ERBB4	REACTOME_NUCLEAR_SIGNALING_BY_ERBB4	0.0288477	0.255384	387	38	2	PGR	STAT5A
RHO_PROTEIN_SIGNAL_TRANSDUCTION	RHO_PROTEIN_SIGNAL_TRANSDUCTION	0.0288477	0.255384	387	38	2	APOE	TAX1BP3
PROTEINACEOUS_EXTRACELLULAR_MATRIX	PROTEINACEOUS_EXTRACELLULAR_MATRIX	0.0297823	0.262666	387	96	3	AGRN	COL5A1	EFEMP1
BIOCARTA_FCER1_PATHWAY	BIOCARTA_FCER1_PATHWAY	0.0302695	0.264971	387	39	2	LYN	NFATC2
CELL_CORTEX	CELL_CORTEX	0.0302695	0.264971	387	39	2	SCIN	SPINK5
EXTRACELLULAR_MATRIX	EXTRACELLULAR_MATRIX	0.0313862	0.272711	387	98	3	AGRN	COL5A1	EFEMP1
REACTOME_POTASSIUM_CHANNELS	REACTOME_POTASSIUM_CHANNELS	0.0313862	0.272711	387	98	3	KCNF1	KCNK2	KCNQ4
NEGATIVE_REGULATION_OF_GROWTH	NEGATIVE_REGULATION_OF_GROWTH	0.0317186	0.273573	387	40	2	DCBLD2	TP53
REGULATION_OF_SECRETION	REGULATION_OF_SECRETION	0.0317186	0.273573	387	40	2	LIF	SCIN
AXONOGENESIS	AXONOGENESIS	0.0331945	0.283053	387	41	2	APOE	FEZ1
CHEMOKINE_ACTIVITY	CHEMOKINE_ACTIVITY	0.0331945	0.283053	387	41	2	CCL28	CXCL16
KEGG_TYROSINE_METABOLISM	KEGG_TYROSINE_METABOLISM	0.0331945	0.283053	387	41	2	ALDH1A3	TYRP1
SYNAPTIC_TRANSMISSION	SYNAPTIC_TRANSMISSION	0.033421	0.283053	387	173	4	APOE	PCDHB11	PCDHB5	PCDHB9
TRANSCRIPTION_ACTIVATOR_ACTIVITY	TRANSCRIPTION_ACTIVATOR_ACTIVITY	0.033421	0.283053	387	173	4	CDH1	DTX1	NFATC2	RUNX2
KEGG_GNRH_SIGNALING_PATHWAY	KEGG_GNRH_SIGNALING_PATHWAY	0.0338754	0.28587	387	101	3	EGFR	PLCB3	PLD1
BLOOD_COAGULATION	BLOOD_COAGULATION	0.0346968	0.288648	387	42	2	CD36	PROS1
CHEMOKINE_RECEPTOR_BINDING	CHEMOKINE_RECEPTOR_BINDING	0.0346968	0.288648	387	42	2	CCL28	CXCL16
REGULATION_OF_CYCLIN_DEPENDENT_PROTEIN_KINASE_ACTIVITY	REGULATION_OF_CYCLIN_DEPENDENT_PROTEIN_KINASE_ACTIVITY	0.0346968	0.288648	387	42	2	HERC5	LATS2
REGULATION_OF_PROTEIN_MODIFICATION_PROCESS	REGULATION_OF_PROTEIN_MODIFICATION_PROCESS	0.0346968	0.288648	387	42	2	EGFR	LYN
COAGULATION	COAGULATION	0.0362251	0.296112	387	43	2	CD36	PROS1
REACTOME_IL_3_5_AND_GM_CSF_SIGNALING	REACTOME_IL_3_5_AND_GM_CSF_SIGNALING	0.0362251	0.296112	387	43	2	LYN	STAT5A
REACTOME_NRAGE_SIGNALS_DEATH_THROUGH_JNK	REACTOME_NRAGE_SIGNALS_DEATH_THROUGH_JNK	0.0362251	0.296112	387	43	2	ARHGEF4	NGFR
REACTOME_SIGNALING_BY_FGFR_MUTANTS	REACTOME_SIGNALING_BY_FGFR_MUTANTS	0.0362251	0.296112	387	43	2	FGFR3	STAT5A
REACTOME_VOLTAGE_GATED_POTASSIUM_CHANNELS	REACTOME_VOLTAGE_GATED_POTASSIUM_CHANNELS	0.0362251	0.296112	387	43	2	KCNF1	KCNQ4
REACTOME_POST_TRANSLATIONAL_PROTEIN_MODIFICATION	REACTOME_POST_TRANSLATIONAL_PROTEIN_MODIFICATION	0.0365117	0.297418	387	178	4	EIF5A2	GALNT12	GFPT2	PROS1
REGULATION_OF_CELL_CYCLE	REGULATION_OF_CELL_CYCLE	0.037149	0.301562	387	179	4	HERC5	LATS2	SPHK1	TP53
NEGATIVE_REGULATION_OF_CELLULAR_PROTEIN_METABOLIC_PROCESS	NEGATIVE_REGULATION_OF_CELLULAR_PROTEIN_METABOLIC_PROCESS	0.0377789	0.304568	387	44	2	GSN	TIMP1
POSITIVE_REGULATION_OF_MAP_KINASE_ACTIVITY	POSITIVE_REGULATION_OF_MAP_KINASE_ACTIVITY	0.0377789	0.304568	387	44	2	EGFR	MAP3K11
KINASE_REGULATOR_ACTIVITY	KINASE_REGULATOR_ACTIVITY	0.0393579	0.315132	387	45	2	PKIA	SFN
REACTOME_LIPID_DIGESTION_MOBILIZATION_AND_TRANSPORT	REACTOME_LIPID_DIGESTION_MOBILIZATION_AND_TRANSPORT	0.0393579	0.315132	387	45	2	APOE	CAV1
ION_TRANSPORT	ION_TRANSPORT	0.0397618	0.317283	387	183	4	CLIC3	KCNF1	KCNQ4	RHCG
CYTOKINE_ACTIVITY	CYTOKINE_ACTIVITY	0.0400689	0.317573	387	108	3	CCL28	CXCL16	TNFRSF11B
REACTOME_GLYCOSAMINOGLYCAN_METABOLISM	REACTOME_GLYCOSAMINOGLYCAN_METABOLISM	0.0400689	0.317573	387	108	3	AGRN	CHST11	CHST3
BIOCARTA_KERATINOCYTE_PATHWAY	BIOCARTA_KERATINOCYTE_PATHWAY	0.0409615	0.318271	387	46	2	EGFR	FAS
HYDROLASE_ACTIVITY_ACTING_ON_CARBON_NITROGEN_NOT_PEPTIDEBONDS	HYDROLASE_ACTIVITY_ACTING_ON_CARBON_NITROGEN_NOT_PEPTIDEBONDS	0.0409615	0.318271	387	46	2	PADI3	PDF
KEGG_CHEMOKINE_SIGNALING_PATHWAY	KEGG_CHEMOKINE_SIGNALING_PATHWAY	0.040431	0.318271	387	184	4	CCL28	CXCL16	LYN	PLCB3
NEGATIVE_REGULATION_OF_TRANSCRIPTION	NEGATIVE_REGULATION_OF_TRANSCRIPTION	0.0411066	0.318271	387	185	4	ID4	NR6A1	RUNX2	TBX2
PROTEOLYSIS	PROTEOLYSIS	0.0411066	0.318271	387	185	4	DPP3	MBTPS1	ST14	TIMP1
RESPONSE_TO_LIGHT_STIMULUS	RESPONSE_TO_LIGHT_STIMULUS	0.0409615	0.318271	387	46	2	IVL	MC1R
TRANSITION_METAL_ION_BINDING	TRANSITION_METAL_ION_BINDING	0.0409973	0.318271	387	109	3	MSRB3	TP53	ZFPM2
RESPONSE_TO_WOUNDING	RESPONSE_TO_WOUNDING	0.0417885	0.322486	387	186	4	CD36	DCBLD2	PROS1	S100A9
CELLULAR_MORPHOGENESIS_DURING_DIFFERENTIATION	CELLULAR_MORPHOGENESIS_DURING_DIFFERENTIATION	0.0425894	0.324398	387	47	2	APOE	FEZ1
HEMOSTASIS	HEMOSTASIS	0.0425894	0.324398	387	47	2	CD36	PROS1
NEGATIVE_REGULATION_OF_PROTEIN_METABOLIC_PROCESS	NEGATIVE_REGULATION_OF_PROTEIN_METABOLIC_PROCESS	0.0425894	0.324398	387	47	2	GSN	TIMP1
REACTOME_NUCLEAR_RECEPTOR_TRANSCRIPTION_PATHWAY	REACTOME_NUCLEAR_RECEPTOR_TRANSCRIPTION_PATHWAY	0.0425894	0.324398	387	47	2	NR6A1	PGR
REACTOME_G_ALPHA_I_SIGNALLING_EVENTS	REACTOME_G_ALPHA_I_SIGNALLING_EVENTS	0.0431715	0.326711	387	188	4	C3	CCL28	CXCL16	PTGER3
TRANSMISSION_OF_NERVE_IMPULSE	TRANSMISSION_OF_NERVE_IMPULSE	0.0431715	0.326711	387	188	4	APOE	PCDHB11	PCDHB5	PCDHB9
CARBOHYDRATE_BIOSYNTHETIC_PROCESS	CARBOHYDRATE_BIOSYNTHETIC_PROCESS	0.0442411	0.331596	387	48	2	CHST11	CHST3
PROTEIN_DNA_COMPLEX_ASSEMBLY	PROTEIN_DNA_COMPLEX_ASSEMBLY	0.0442411	0.331596	387	48	2	NAP1L2	PBX3
REGULATION_OF_PHOSPHORYLATION	REGULATION_OF_PHOSPHORYLATION	0.0442411	0.331596	387	48	2	EGFR	LYN
KEGG_VASCULAR_SMOOTH_MUSCLE_CONTRACTION	KEGG_VASCULAR_SMOOTH_MUSCLE_CONTRACTION	0.0448186	0.334855	387	113	3	ACTA2	MYL9	PLCB3
ANTI_APOPTOSIS	ANTI_APOPTOSIS	0.0467933	0.348498	387	115	3	FAS	IFI6	SPHK1
REACTOME_PROTEIN_FOLDING	REACTOME_PROTEIN_FOLDING	0.0476145	0.352378	387	50	2	KIFC3	SPHK1
REACTOME_TCR_SIGNALING	REACTOME_TCR_SIGNALING	0.0476145	0.352378	387	50	2	HLA-DRB1	HLA-DRB5
REACTOME_SIGNALING_BY_PDGF	REACTOME_SIGNALING_BY_PDGF	0.0488102	0.360091	387	117	3	COL5A1	COL6A2	STAT5A
NEURITE_DEVELOPMENT	NEURITE_DEVELOPMENT	0.0493354	0.36169	387	51	2	APOE	FEZ1
REACTOME_CHEMOKINE_RECEPTORS_BIND_CHEMOKINES	REACTOME_CHEMOKINE_RECEPTORS_BIND_CHEMOKINES	0.0493354	0.36169	387	51	2	CCL28	CXCL16
REACTOME_GASTRIN_CREB_SIGNALLING_PATHWAY_VIA_PKC_AND_MAPK	REACTOME_GASTRIN_CREB_SIGNALLING_PATHWAY_VIA_PKC_AND_MAPK	0.0512339	0.374439	387	199	4	EGFR	GNA14	GRPR	PLCB3
G_PROTEIN_COUPLED_RECEPTOR_BINDING	G_PROTEIN_COUPLED_RECEPTOR_BINDING	0.0528434	0.385002	387	53	2	CCL28	CXCL16
BIOCARTA_NFAT_PATHWAY	BIOCARTA_NFAT_PATHWAY	0.0546299	0.390737	387	54	2	LIF	NFATC2
KEGG_INOSITOL_PHOSPHATE_METABOLISM	KEGG_INOSITOL_PHOSPHATE_METABOLISM	0.0546299	0.390737	387	54	2	PLCB3	PLCD3
KEGG_NON_SMALL_CELL_LUNG_CANCER	KEGG_NON_SMALL_CELL_LUNG_CANCER	0.0546299	0.390737	387	54	2	EGFR	TP53
POSITIVE_REGULATION_OF_HYDROLASE_ACTIVITY	POSITIVE_REGULATION_OF_HYDROLASE_ACTIVITY	0.0546299	0.390737	387	54	2	EGFR	TP53
REACTOME_PROSTANOID_LIGAND_RECEPTORS	REACTOME_PROSTANOID_LIGAND_RECEPTORS	0.05439	0.390737	387	8	1	PTGER3
REGULATION_OF_CELLULAR_COMPONENT_ORGANIZATION_AND_BIOGENESIS	REGULATION_OF_CELLULAR_COMPONENT_ORGANIZATION_AND_BIOGENESIS	0.0540354	0.390737	387	122	3	APOE	GSN	PBX3
CELLULAR_CARBOHYDRATE_METABOLIC_PROCESS	CELLULAR_CARBOHYDRATE_METABOLIC_PROCESS	0.0551114	0.392983	387	123	3	CHST11	CHST3	GFPT2
GROWTH_FACTOR_ACTIVITY	GROWTH_FACTOR_ACTIVITY	0.0564374	0.401218	387	55	2	DKK1	GRN
REACTOME_MEMBRANE_TRAFFICKING	REACTOME_MEMBRANE_TRAFFICKING	0.057294	0.406078	387	125	3	AP2M1	GJB2	GJC1
EMBRYONIC_DEVELOPMENT	EMBRYONIC_DEVELOPMENT	0.0582656	0.406819	387	56	2	PBX3	ZIC1
EXTRACELLULAR_MATRIX_PART	EXTRACELLULAR_MATRIX_PART	0.0582656	0.406819	387	56	2	AGRN	COL5A1
KEGG_HEDGEHOG_SIGNALING_PATHWAY	KEGG_HEDGEHOG_SIGNALING_PATHWAY	0.0582656	0.406819	387	56	2	BMP8B	SMO
KEGG_PATHOGENIC_ESCHERICHIA_COLI_INFECTION	KEGG_PATHOGENIC_ESCHERICHIA_COLI_INFECTION	0.0582656	0.406819	387	56	2	CDH1	CLDN1
REGULATION_OF_BODY_FLUID_LEVELS	REGULATION_OF_BODY_FLUID_LEVELS	0.0582656	0.406819	387	56	2	CD36	PROS1
ACTIN_CYTOSKELETON	ACTIN_CYTOSKELETON	0.059517	0.41226	387	127	3	CDH1	GSN	MYL9
BIOCARTA_PPARA_PATHWAY	BIOCARTA_PPARA_PATHWAY	0.0601141	0.41226	387	57	2	CD36	STAT5A
BIOCARTA_TCAPOPTOSIS_PATHWAY	BIOCARTA_TCAPOPTOSIS_PATHWAY	0.0609779	0.41226	387	9	1	FAS
HETEROPHILIC_CELL_ADHESION	HETEROPHILIC_CELL_ADHESION	0.0609779	0.41226	387	9	1	AMIGO2
INTERCALATED_DISC	INTERCALATED_DISC	0.0609779	0.41226	387	9	1	GJB2
KEGG_AXON_GUIDANCE	KEGG_AXON_GUIDANCE	0.059517	0.41226	387	127	3	NFATC2	SEMA6A	SEMA7A
MAP_KINASE_KINASE_KINASE_ACTIVITY	MAP_KINASE_KINASE_KINASE_ACTIVITY	0.0609779	0.41226	387	9	1	MAP3K11
POTASSIUM_ION_TRANSPORT	POTASSIUM_ION_TRANSPORT	0.0601141	0.41226	387	57	2	KCNF1	KCNQ4
REACTOME_VEGF_LIGAND_RECEPTOR_INTERACTIONS	REACTOME_VEGF_LIGAND_RECEPTOR_INTERACTIONS	0.0609779	0.41226	387	9	1	FLT4
REGULATION_OF_TYROSINE_PHOSPHORYLATION_OF_STAT_PROTEIN	REGULATION_OF_TYROSINE_PHOSPHORYLATION_OF_STAT_PROTEIN	0.0609779	0.41226	387	9	1	LYN
STRUCTURAL_CONSTITUENT_OF_CYTOSKELETON	STRUCTURAL_CONSTITUENT_OF_CYTOSKELETON	0.0601141	0.41226	387	57	2	AGRN	KRT15
BIOCARTA_HIVNEF_PATHWAY	BIOCARTA_HIVNEF_PATHWAY	0.0619826	0.41546	387	58	2	FAS	GSN
REACTOME_CELL_DEATH_SIGNALLING_VIA_NRAGE_NRIF_AND_NADE	REACTOME_CELL_DEATH_SIGNALLING_VIA_NRAGE_NRIF_AND_NADE	0.0619826	0.41546	387	58	2	ARHGEF4	NGFR
SEQUENCE_SPECIFIC_DNA_BINDING	SEQUENCE_SPECIFIC_DNA_BINDING	0.0619826	0.41546	387	58	2	NR6A1	TBX2
BIOCARTA_BARRESTIN_PATHWAY	BIOCARTA_BARRESTIN_PATHWAY	0.06752	0.423535	387	10	1	AP2M1
BIOCARTA_EPHA4_PATHWAY	BIOCARTA_EPHA4_PATHWAY	0.06752	0.423535	387	10	1	LYN
BIOCARTA_IL5_PATHWAY	BIOCARTA_IL5_PATHWAY	0.06752	0.423535	387	10	1	HLA-DRB1
BIOCARTA_LYM_PATHWAY	BIOCARTA_LYM_PATHWAY	0.06752	0.423535	387	10	1	ICAM1
BIOCARTA_RNA_PATHWAY	BIOCARTA_RNA_PATHWAY	0.06752	0.423535	387	10	1	TP53
CELLULAR_RESPONSE_TO_NUTRIENT_LEVELS	CELLULAR_RESPONSE_TO_NUTRIENT_LEVELS	0.06752	0.423535	387	10	1	TP53
CELLULAR_RESPONSE_TO_STRESS	CELLULAR_RESPONSE_TO_STRESS	0.06752	0.423535	387	10	1	TP53
EPITHELIAL_CELL_DIFFERENTIATION	EPITHELIAL_CELL_DIFFERENTIATION	0.06752	0.423535	387	10	1	SPINK5
HYDROLASE_ACTIVITY_HYDROLYZING_N_GLYCOSYL_COMPOUNDS	HYDROLASE_ACTIVITY_HYDROLYZING_N_GLYCOSYL_COMPOUNDS	0.06752	0.423535	387	10	1	ADPRH
INSULIN_LIKE_GROWTH_FACTOR_RECEPTOR_BINDING	INSULIN_LIKE_GROWTH_FACTOR_RECEPTOR_BINDING	0.06752	0.423535	387	10	1	IGF2
LYSOSOMAL_MEMBRANE	LYSOSOMAL_MEMBRANE	0.06752	0.423535	387	10	1	LAMP3
NUCLEOSOME_ASSEMBLY	NUCLEOSOME_ASSEMBLY	0.06752	0.423535	387	10	1	NAP1L2
OXIDOREDUCTASE_ACTIVITY_ACTING_ON_SULFUR_GROUP_OF_DONORS	OXIDOREDUCTASE_ACTIVITY_ACTING_ON_SULFUR_GROUP_OF_DONORS	0.06752	0.423535	387	10	1	MSRB3
OXIDOREDUCTASE_ACTIVITY_GO_0016706	OXIDOREDUCTASE_ACTIVITY_GO_0016706	0.06752	0.423535	387	10	1	PLOD2
POSITIVE_REGULATION_OF_EPITHELIAL_CELL_PROLIFERATION	POSITIVE_REGULATION_OF_EPITHELIAL_CELL_PROLIFERATION	0.06752	0.423535	387	10	1	EGFR
PROTEIN_BINDING_BRIDGING	PROTEIN_BINDING_BRIDGING	0.0638707	0.423535	387	59	2	GRB14	IVL
REACTOME_ABACAVIR_TRANSPORT_AND_METABOLISM	REACTOME_ABACAVIR_TRANSPORT_AND_METABOLISM	0.06752	0.423535	387	10	1	ABCG2
REACTOME_GAMMA_CARBOXYLATION_TRANSPORT_AND_AMINO_TERMINAL_CLEAVAGE_OF_PROTEINS	REACTOME_GAMMA_CARBOXYLATION_TRANSPORT_AND_AMINO_TERMINAL_CLEAVAGE_OF_PROTEINS	0.06752	0.423535	387	10	1	PROS1
REACTOME_GAP_JUNCTION_DEGRADATION	REACTOME_GAP_JUNCTION_DEGRADATION	0.06752	0.423535	387	10	1	AP2M1
REACTOME_PECAM1_INTERACTIONS	REACTOME_PECAM1_INTERACTIONS	0.06752	0.423535	387	10	1	LYN
REACTOME_REGULATED_PROTEOLYSIS_OF_P75NTR	REACTOME_REGULATED_PROTEOLYSIS_OF_P75NTR	0.06752	0.423535	387	10	1	NGFR
REGULATION_OF_AXONOGENESIS	REGULATION_OF_AXONOGENESIS	0.06752	0.423535	387	10	1	APOE
RESPONSE_TO_RADIATION	RESPONSE_TO_RADIATION	0.0638707	0.423535	387	59	2	IVL	MC1R
RESPONSE_TO_STEROID_HORMONE_STIMULUS	RESPONSE_TO_STEROID_HORMONE_STIMULUS	0.06752	0.423535	387	10	1	CALCR
KEGG_GLYCOLYSIS_GLUCONEOGENESIS	KEGG_GLYCOLYSIS_GLUCONEOGENESIS	0.0677041	0.423557	387	61	2	ALDH1A3	PFKP
BIOCARTA_CDK5_PATHWAY	BIOCARTA_CDK5_PATHWAY	0.0740167	0.430876	387	11	1	NGFR
BIOCARTA_EGFR_SMRTE_PATHWAY	BIOCARTA_EGFR_SMRTE_PATHWAY	0.0740167	0.430876	387	11	1	EGFR
BIOCARTA_MONOCYTE_PATHWAY	BIOCARTA_MONOCYTE_PATHWAY	0.0740167	0.430876	387	11	1	ICAM1
BIOCARTA_TCRA_PATHWAY	BIOCARTA_TCRA_PATHWAY	0.0740167	0.430876	387	11	1	HLA-DRB1
COFACTOR_TRANSPORT	COFACTOR_TRANSPORT	0.0740167	0.430876	387	11	1	FOLR1
DEVELOPMENTAL_GROWTH	DEVELOPMENTAL_GROWTH	0.0740167	0.430876	387	11	1	SPINK5
INTERCELLULAR_JUNCTION_ASSEMBLY	INTERCELLULAR_JUNCTION_ASSEMBLY	0.0740167	0.430876	387	11	1	GJC1
INTERPHASE_OF_MITOTIC_CELL_CYCLE	INTERPHASE_OF_MITOTIC_CELL_CYCLE	0.0696488	0.430876	387	62	2	LATS2	MAP3K11
KEGG_COLORECTAL_CANCER	KEGG_COLORECTAL_CANCER	0.0696488	0.430876	387	62	2	TCF7L1	TP53
MAINTENANCE_OF_CELLULAR_PROTEIN_LOCALIZATION	MAINTENANCE_OF_CELLULAR_PROTEIN_LOCALIZATION	0.0740167	0.430876	387	11	1	PDIA2
MITOCHONDRIAL_MEMBRANE_ORGANIZATION_AND_BIOGENESIS	MITOCHONDRIAL_MEMBRANE_ORGANIZATION_AND_BIOGENESIS	0.0740167	0.430876	387	11	1	TP53
N_TERMINAL_PROTEIN_AMINO_ACID_MODIFICATION	N_TERMINAL_PROTEIN_AMINO_ACID_MODIFICATION	0.0740167	0.430876	387	11	1	PDF
NEGATIVE_REGULATION_OF_CYTOSKELETON_ORGANIZATION_AND_BIOGENESIS	NEGATIVE_REGULATION_OF_CYTOSKELETON_ORGANIZATION_AND_BIOGENESIS	0.0740167	0.430876	387	11	1	GSN
NEGATIVE_REGULATION_OF_RESPONSE_TO_STIMULUS	NEGATIVE_REGULATION_OF_RESPONSE_TO_STIMULUS	0.0740167	0.430876	387	11	1	SPINK5
REACTOME_BILE_SALT_AND_ORGANIC_ANION_SLC_TRANSPORTERS	REACTOME_BILE_SALT_AND_ORGANIC_ANION_SLC_TRANSPORTERS	0.0740167	0.430876	387	11	1	SLC47A1
REACTOME_DSCAM_INTERACTIONS	REACTOME_DSCAM_INTERACTIONS	0.0740167	0.430876	387	11	1	DSCAM
REACTOME_IL_7_SIGNALING	REACTOME_IL_7_SIGNALING	0.0740167	0.430876	387	11	1	STAT5A
REACTOME_NFKB_IS_ACTIVATED_AND_SIGNALS_SURVIVAL	REACTOME_NFKB_IS_ACTIVATED_AND_SIGNALS_SURVIVAL	0.0740167	0.430876	387	11	1	NGFR
REACTOME_PASSIVE_TRANSPORT_BY_AQUAPORINS	REACTOME_PASSIVE_TRANSPORT_BY_AQUAPORINS	0.0740167	0.430876	387	11	1	AQP3
REACTOME_SIGNAL_REGULATORY_PROTEIN_SIRP_FAMILY_INTERACTIONS	REACTOME_SIGNAL_REGULATORY_PROTEIN_SIRP_FAMILY_INTERACTIONS	0.0740167	0.430876	387	11	1	SIRPA
REACTOME_SIGNALING_BY_FGFR3_MUTANTS	REACTOME_SIGNALING_BY_FGFR3_MUTANTS	0.0740167	0.430876	387	11	1	FGFR3
REACTOME_TRANSPORT_OF_ORGANIC_ANIONS	REACTOME_TRANSPORT_OF_ORGANIC_ANIONS	0.0740167	0.430876	387	11	1	SLCO4A1
REGULATION_OF_GENE_SPECIFIC_TRANSCRIPTION	REGULATION_OF_GENE_SPECIFIC_TRANSCRIPTION	0.0740167	0.430876	387	11	1	SMARCA1
REGULATION_OF_JAK_STAT_CASCADE	REGULATION_OF_JAK_STAT_CASCADE	0.0740167	0.430876	387	11	1	LYN
REGULATION_OF_MAP_KINASE_ACTIVITY	REGULATION_OF_MAP_KINASE_ACTIVITY	0.0735924	0.430876	387	64	2	EGFR	MAP3K11
REGULATION_OF_SYNAPSE_STRUCTURE_AND_ACTIVITY	REGULATION_OF_SYNAPSE_STRUCTURE_AND_ACTIVITY	0.0740167	0.430876	387	11	1	APOE
STEROL_BINDING	STEROL_BINDING	0.0740167	0.430876	387	11	1	CAV1
VACUOLAR_MEMBRANE	VACUOLAR_MEMBRANE	0.0740167	0.430876	387	11	1	LAMP3
ARYLSULFATASE_ACTIVITY	ARYLSULFATASE_ACTIVITY	0.0804682	0.436987	387	12	1	SULF1
BIOCARTA_LECTIN_PATHWAY	BIOCARTA_LECTIN_PATHWAY	0.0804682	0.436987	387	12	1	C3
BIOCARTA_TCYTOTOXIC_PATHWAY	BIOCARTA_TCYTOTOXIC_PATHWAY	0.0804682	0.436987	387	12	1	ICAM1
BIOCARTA_THELPER_PATHWAY	BIOCARTA_THELPER_PATHWAY	0.0804682	0.436987	387	12	1	ICAM1
CDC42_PROTEIN_SIGNAL_TRANSDUCTION	CDC42_PROTEIN_SIGNAL_TRANSDUCTION	0.0804682	0.436987	387	12	1	APOE
CELLULAR_RESPONSE_TO_EXTRACELLULAR_STIMULUS	CELLULAR_RESPONSE_TO_EXTRACELLULAR_STIMULUS	0.0804682	0.436987	387	12	1	TP53
DNA_DAMAGE_RESPONSESIGNAL_TRANSDUCTION_BY_P53_CLASS_MEDIATOR	DNA_DAMAGE_RESPONSESIGNAL_TRANSDUCTION_BY_P53_CLASS_MEDIATOR	0.0804682	0.436987	387	12	1	TP53
HORMONE_BINDING	HORMONE_BINDING	0.0804682	0.436987	387	12	1	CALCR
KEGG_EPITHELIAL_CELL_SIGNALING_IN_HELICOBACTER_PYLORI_INFECTION	KEGG_EPITHELIAL_CELL_SIGNALING_IN_HELICOBACTER_PYLORI_INFECTION	0.079638	0.436987	387	67	2	EGFR	LYN
KEGG_GLIOMA	KEGG_GLIOMA	0.0755906	0.436987	387	65	2	EGFR	TP53
LIPID_KINASE_ACTIVITY	LIPID_KINASE_ACTIVITY	0.0804682	0.436987	387	12	1	SPHK1
LOW_DENSITY_LIPOPROTEIN_BINDING	LOW_DENSITY_LIPOPROTEIN_BINDING	0.0804682	0.436987	387	12	1	CXCL16
MAINTENANCE_OF_CELLULAR_LOCALIZATION	MAINTENANCE_OF_CELLULAR_LOCALIZATION	0.0804682	0.436987	387	12	1	PDIA2
METALLOEXOPEPTIDASE_ACTIVITY	METALLOEXOPEPTIDASE_ACTIVITY	0.0804682	0.436987	387	12	1	ENPEP
NOTCH_SIGNALING_PATHWAY	NOTCH_SIGNALING_PATHWAY	0.0804682	0.436987	387	12	1	DTX1
NUCLEAR_MATRIX	NUCLEAR_MATRIX	0.0804682	0.436987	387	12	1	TP53
POSITIVE_REGULATION_OF_PEPTIDYL_TYROSINE_PHOSPHORYLATION	POSITIVE_REGULATION_OF_PEPTIDYL_TYROSINE_PHOSPHORYLATION	0.0804682	0.436987	387	12	1	LYN
POSITIVE_REGULATION_OF_TRANSCRIPTION	POSITIVE_REGULATION_OF_TRANSCRIPTION	0.0787049	0.436987	387	143	3	NFATC2	SMARCA1	TP53
REACTOME_ACTIVATION_OF_CHAPERONES_BY_ATF6_ALPHA	REACTOME_ACTIVATION_OF_CHAPERONES_BY_ATF6_ALPHA	0.0804682	0.436987	387	12	1	MBTPS1
REACTOME_CASPASE_MEDIATED_CLEAVAGE_OF_CYTOSKELETAL_PROTEINS	REACTOME_CASPASE_MEDIATED_CLEAVAGE_OF_CYTOSKELETAL_PROTEINS	0.0804682	0.436987	387	12	1	GSN
REACTOME_HORMONE_SENSITIVE_LIPASE_HSL_MEDIATED_TRIACYLGLYCEROL_HYDROLYSIS	REACTOME_HORMONE_SENSITIVE_LIPASE_HSL_MEDIATED_TRIACYLGLYCEROL_HYDROLYSIS	0.0804682	0.436987	387	12	1	CAV1
REACTOME_P75NTR_RECRUITS_SIGNALLING_COMPLEXES	REACTOME_P75NTR_RECRUITS_SIGNALLING_COMPLEXES	0.0804682	0.436987	387	12	1	NGFR
REACTOME_PLATELET_ADHESION_TO_EXPOSED_COLLAGEN	REACTOME_PLATELET_ADHESION_TO_EXPOSED_COLLAGEN	0.0804682	0.436987	387	12	1	LYN
REACTOME_TANDEM_PORE_DOMAIN_POTASSIUM_CHANNELS	REACTOME_TANDEM_PORE_DOMAIN_POTASSIUM_CHANNELS	0.0804682	0.436987	387	12	1	KCNK2
REGULATION_OF_ACTIN_POLYMERIZATION_AND_OR_DEPOLYMERIZATION	REGULATION_OF_ACTIN_POLYMERIZATION_AND_OR_DEPOLYMERIZATION	0.0804682	0.436987	387	12	1	GSN
SMOOTH_MUSCLE_CONTRACTION_GO_0006939	SMOOTH_MUSCLE_CONTRACTION_GO_0006939	0.0804682	0.436987	387	12	1	SPHK1
SPHINGOID_METABOLIC_PROCESS	SPHINGOID_METABOLIC_PROCESS	0.0804682	0.436987	387	12	1	SPHK1
TYROSINE_PHOSPHORYLATION_OF_STAT_PROTEIN	TYROSINE_PHOSPHORYLATION_OF_STAT_PROTEIN	0.0804682	0.436987	387	12	1	LYN
VITAMIN_BINDING	VITAMIN_BINDING	0.0804682	0.436987	387	12	1	FOLR1
ACTIVATION_OF_JNK_ACTIVITY	ACTIVATION_OF_JNK_ACTIVITY	0.0868749	0.439242	387	13	1	MAP3K11
BIOCARTA_CBL_PATHWAY	BIOCARTA_CBL_PATHWAY	0.0868749	0.439242	387	13	1	EGFR
BIOCARTA_EXTRINSIC_PATHWAY	BIOCARTA_EXTRINSIC_PATHWAY	0.0868749	0.439242	387	13	1	PROS1
BIOCARTA_GRANULOCYTES_PATHWAY	BIOCARTA_GRANULOCYTES_PATHWAY	0.0868749	0.439242	387	13	1	ICAM1
BIOCARTA_RB_PATHWAY	BIOCARTA_RB_PATHWAY	0.0868749	0.439242	387	13	1	TP53
CATION_TRANSPORT	CATION_TRANSPORT	0.081272	0.439242	387	145	3	KCNF1	KCNQ4	RHCG
CORNIFIED_ENVELOPE	CORNIFIED_ENVELOPE	0.0868749	0.439242	387	13	1	IVL
ENDOPLASMIC_RETICULUM_LUMEN	ENDOPLASMIC_RETICULUM_LUMEN	0.0868749	0.439242	387	13	1	MBTPS1
EXTRINSIC_TO_PLASMA_MEMBRANE	EXTRINSIC_TO_PLASMA_MEMBRANE	0.0868749	0.439242	387	13	1	GNA14
G1_PHASE_OF_MITOTIC_CELL_CYCLE	G1_PHASE_OF_MITOTIC_CELL_CYCLE	0.0868749	0.439242	387	13	1	MAP3K11
HOMOPHILIC_CELL_ADHESION	HOMOPHILIC_CELL_ADHESION	0.0868749	0.439242	387	13	1	AMIGO2
INTERCELLULAR_JUNCTION_ASSEMBLY_AND_MAINTENANCE	INTERCELLULAR_JUNCTION_ASSEMBLY_AND_MAINTENANCE	0.0868749	0.439242	387	13	1	GJC1
INTERPHASE	INTERPHASE	0.0816866	0.439242	387	68	2	LATS2	MAP3K11
KEGG_ALZHEIMERS_DISEASE	KEGG_ALZHEIMERS_DISEASE	0.081272	0.439242	387	145	3	APOE	FAS	PLCB3
KEGG_LONG_TERM_DEPRESSION	KEGG_LONG_TERM_DEPRESSION	0.0816866	0.439242	387	68	2	LYN	PLCB3
KEGG_PPAR_SIGNALING_PATHWAY	KEGG_PPAR_SIGNALING_PATHWAY	0.0837513	0.439242	387	69	2	ANGPTL4	CD36
KEGG_RIG_I_LIKE_RECEPTOR_SIGNALING_PATHWAY	KEGG_RIG_I_LIKE_RECEPTOR_SIGNALING_PATHWAY	0.0837513	0.439242	387	69	2	ISG15	TBKBP1
KEGG_SULFUR_METABOLISM	KEGG_SULFUR_METABOLISM	0.0868749	0.439242	387	13	1	CHST11
MAINTENANCE_OF_PROTEIN_LOCALIZATION	MAINTENANCE_OF_PROTEIN_LOCALIZATION	0.0868749	0.439242	387	13	1	PDIA2
MICROTUBULE_CYTOSKELETON	MICROTUBULE_CYTOSKELETON	0.0838749	0.439242	387	147	3	KIFC3	LATS2	MAP3K11
NEGATIVE_REGULATION_OF_ANGIOGENESIS	NEGATIVE_REGULATION_OF_ANGIOGENESIS	0.0868749	0.439242	387	13	1	SPINK5
NEGATIVE_REGULATION_OF_SECRETION	NEGATIVE_REGULATION_OF_SECRETION	0.0868749	0.439242	387	13	1	LIF
REACTOME_EXTRINSIC_PATHWAY_FOR_APOPTOSIS	REACTOME_EXTRINSIC_PATHWAY_FOR_APOPTOSIS	0.0868749	0.439242	387	13	1	FAS
REACTOME_PURINE_SALVAGE	REACTOME_PURINE_SALVAGE	0.0868749	0.439242	387	13	1	APRT
REACTOME_RETROGRADE_NEUROTROPHIN_SIGNALLING	REACTOME_RETROGRADE_NEUROTROPHIN_SIGNALLING	0.0868749	0.439242	387	13	1	AP2M1
REGULATION_OF_ACTIN_FILAMENT_LENGTH	REGULATION_OF_ACTIN_FILAMENT_LENGTH	0.0868749	0.439242	387	13	1	GSN
REGULATION_OF_HOMEOSTATIC_PROCESS	REGULATION_OF_HOMEOSTATIC_PROCESS	0.0868749	0.439242	387	13	1	IFI6
REGULATION_OF_MULTICELLULAR_ORGANISMAL_PROCESS	REGULATION_OF_MULTICELLULAR_ORGANISMAL_PROCESS	0.0838749	0.439242	387	147	3	MYL9	SPHK1	SPINK5
SENSORY_ORGAN_DEVELOPMENT	SENSORY_ORGAN_DEVELOPMENT	0.0868749	0.439242	387	13	1	ZIC1
STEROID_HORMONE_RECEPTOR_ACTIVITY	STEROID_HORMONE_RECEPTOR_ACTIVITY	0.0868749	0.439242	387	13	1	PGR
VACUOLAR_PART	VACUOLAR_PART	0.0868749	0.439242	387	13	1	LAMP3
VITAMIN_TRANSPORT	VITAMIN_TRANSPORT	0.0868749	0.439242	387	13	1	FOLR1
POSITIVE_REGULATION_OF_CELLULAR_PROTEIN_METABOLIC_PROCESS	POSITIVE_REGULATION_OF_CELLULAR_PROTEIN_METABOLIC_PROCESS	0.0879279	0.441711	387	71	2	LYN	SAMD4A
REACTOME_TRANSCRIPTIONAL_REGULATION_OF_WHITE_ADIPOCYTE_DIFFERENTIATION	REACTOME_TRANSCRIPTIONAL_REGULATION_OF_WHITE_ADIPOCYTE_DIFFERENTIATION	0.0879279	0.441711	387	71	2	ANGPTL4	CD36
TRANSCRIPTION_REPRESSOR_ACTIVITY	TRANSCRIPTION_REPRESSOR_ACTIVITY	0.0878454	0.441711	387	150	3	ID4	TBX2	ZFPM2
ACTIN_FILAMENT_POLYMERIZATION	ACTIN_FILAMENT_POLYMERIZATION	0.093237	0.442782	387	14	1	GSN
AMINOPEPTIDASE_ACTIVITY	AMINOPEPTIDASE_ACTIVITY	0.093237	0.442782	387	14	1	ENPEP
APICAL_PLASMA_MEMBRANE	APICAL_PLASMA_MEMBRANE	0.093237	0.442782	387	14	1	RHCG
BIOCARTA_CLASSIC_PATHWAY	BIOCARTA_CLASSIC_PATHWAY	0.093237	0.442782	387	14	1	C3
CARBOXY_LYASE_ACTIVITY	CARBOXY_LYASE_ACTIVITY	0.093237	0.442782	387	14	1	MVD
ENDOCYTIC_VESICLE	ENDOCYTIC_VESICLE	0.093237	0.442782	387	14	1	EGFR
ER_NUCLEAR_SIGNALING_PATHWAY	ER_NUCLEAR_SIGNALING_PATHWAY	0.093237	0.442782	387	14	1	TP53
KEGG_CHRONIC_MYELOID_LEUKEMIA	KEGG_CHRONIC_MYELOID_LEUKEMIA	0.0921654	0.442782	387	73	2	STAT5A	TP53
KINESIN_COMPLEX	KINESIN_COMPLEX	0.093237	0.442782	387	14	1	KIFC3
LEARNING_AND_OR_MEMORY	LEARNING_AND_OR_MEMORY	0.093237	0.442782	387	14	1	APOE
MITOTIC_CELL_CYCLE	MITOTIC_CELL_CYCLE	0.0918938	0.442782	387	153	3	LATS2	MAP3K11	SPHK1
NEGATIVE_REGULATION_OF_IMMUNE_SYSTEM_PROCESS	NEGATIVE_REGULATION_OF_IMMUNE_SYSTEM_PROCESS	0.093237	0.442782	387	14	1	SPINK5
PHOSPHOLIPASE_C_ACTIVATION	PHOSPHOLIPASE_C_ACTIVATION	0.093237	0.442782	387	14	1	EGFR
POSITIVE_REGULATION_OF_NUCLEOBASENUCLEOSIDENUCLEOTIDE_AND_NUCLEIC_ACID_METABOLIC_PROCESS	POSITIVE_REGULATION_OF_NUCLEOBASENUCLEOSIDENUCLEOTIDE_AND_NUCLEIC_ACID_METABOLIC_PROCESS	0.0918938	0.442782	387	153	3	NFATC2	SMARCA1	TP53
POSITIVE_REGULATION_OF_PROTEIN_METABOLIC_PROCESS	POSITIVE_REGULATION_OF_PROTEIN_METABOLIC_PROCESS	0.0921654	0.442782	387	73	2	LYN	SAMD4A
REACTOME_CELL_EXTRACELLULAR_MATRIX_INTERACTIONS	REACTOME_CELL_EXTRACELLULAR_MATRIX_INTERACTIONS	0.093237	0.442782	387	14	1	FBLIM1
REACTOME_COMMON_PATHWAY	REACTOME_COMMON_PATHWAY	0.093237	0.442782	387	14	1	PROS1
REACTOME_EICOSANOID_LIGAND_BINDING_RECEPTORS	REACTOME_EICOSANOID_LIGAND_BINDING_RECEPTORS	0.093237	0.442782	387	14	1	PTGER3
REACTOME_P75NTR_SIGNALS_VIA_NFKB	REACTOME_P75NTR_SIGNALS_VIA_NFKB	0.093237	0.442782	387	14	1	NGFR
REACTOME_PROLACTIN_RECEPTOR_SIGNALING	REACTOME_PROLACTIN_RECEPTOR_SIGNALING	0.093237	0.442782	387	14	1	STAT5A
REACTOME_RIG_I_MDA5_MEDIATED_INDUCTION_OF_IFN_ALPHA_BETA_PATHWAYS	REACTOME_RIG_I_MDA5_MEDIATED_INDUCTION_OF_IFN_ALPHA_BETA_PATHWAYS	0.0900392	0.442782	387	72	2	HERC5	ISG15
REACTOME_SYNTHESIS_OF_SUBSTRATES_IN_N_GLYCAN_BIOSYTHESIS	REACTOME_SYNTHESIS_OF_SUBSTRATES_IN_N_GLYCAN_BIOSYTHESIS	0.093237	0.442782	387	14	1	GFPT2
REGIONALIZATION	REGIONALIZATION	0.093237	0.442782	387	14	1	PBX3
REGULATION_OF_CELLULAR_COMPONENT_SIZE	REGULATION_OF_CELLULAR_COMPONENT_SIZE	0.093237	0.442782	387	14	1	GSN
REGULATION_OF_HORMONE_SECRETION	REGULATION_OF_HORMONE_SECRETION	0.093237	0.442782	387	14	1	LIF
REGULATION_OF_NEUROGENESIS	REGULATION_OF_NEUROGENESIS	0.093237	0.442782	387	14	1	APOE
TISSUE_MORPHOGENESIS	TISSUE_MORPHOGENESIS	0.093237	0.442782	387	14	1	SPINK5
KEGG_ARRHYTHMOGENIC_RIGHT_VENTRICULAR_CARDIOMYOPATHY_ARVC	KEGG_ARRHYTHMOGENIC_RIGHT_VENTRICULAR_CARDIOMYOPATHY_ARVC	0.0943061	0.445155	387	74	2	ITGB4	TCF7L1
KEGG_B_CELL_RECEPTOR_SIGNALING_PATHWAY	KEGG_B_CELL_RECEPTOR_SIGNALING_PATHWAY	0.0943061	0.445155	387	74	2	LYN	NFATC2
REACTOME_ANTIGEN_PROCESSING_CROSS_PRESENTATION	REACTOME_ANTIGEN_PROCESSING_CROSS_PRESENTATION	0.0943061	0.445155	387	74	2	CD36	NCF2
BIOCARTA_HSP27_PATHWAY	BIOCARTA_HSP27_PATHWAY	0.099555	0.449146	387	15	1	FAS
BIOCARTA_IL3_PATHWAY	BIOCARTA_IL3_PATHWAY	0.099555	0.449146	387	15	1	STAT5A
CARBOHYDRATE_KINASE_ACTIVITY	CARBOHYDRATE_KINASE_ACTIVITY	0.099555	0.449146	387	15	1	PFKP
CELL_SURFACE	CELL_SURFACE	0.0964611	0.449146	387	75	2	DCBLD2	SULF1
COPPER_ION_BINDING	COPPER_ION_BINDING	0.099555	0.449146	387	15	1	TP53
CYTOPLASM_ORGANIZATION_AND_BIOGENESIS	CYTOPLASM_ORGANIZATION_AND_BIOGENESIS	0.099555	0.449146	387	15	1	GJC1
ENERGY_RESERVE_METABOLIC_PROCESS	ENERGY_RESERVE_METABOLIC_PROCESS	0.099555	0.449146	387	15	1	GFPT2
G1_PHASE	G1_PHASE	0.099555	0.449146	387	15	1	MAP3K11
INSOLUBLE_FRACTION	INSOLUBLE_FRACTION	0.099555	0.449146	387	15	1	TP53
KEGG_PHOSPHATIDYLINOSITOL_SIGNALING_SYSTEM	KEGG_PHOSPHATIDYLINOSITOL_SIGNALING_SYSTEM	0.09863	0.449146	387	76	2	PLCB3	PLCD3
KEGG_TERPENOID_BACKBONE_BIOSYNTHESIS	KEGG_TERPENOID_BACKBONE_BIOSYNTHESIS	0.099555	0.449146	387	15	1	MVD
KEGG_VEGF_SIGNALING_PATHWAY	KEGG_VEGF_SIGNALING_PATHWAY	0.0964611	0.449146	387	75	2	NFATC2	SPHK1
KERATINOCYTE_DIFFERENTIATION	KERATINOCYTE_DIFFERENTIATION	0.099555	0.449146	387	15	1	IVL
POSITIVE_REGULATION_OF_JNK_ACTIVITY	POSITIVE_REGULATION_OF_JNK_ACTIVITY	0.099555	0.449146	387	15	1	MAP3K11
REACTOME_AMINO_ACID_SYNTHESIS_AND_INTERCONVERSION_TRANSAMINATION	REACTOME_AMINO_ACID_SYNTHESIS_AND_INTERCONVERSION_TRANSAMINATION	0.099555	0.449146	387	15	1	PSAT1
REACTOME_HDL_MEDIATED_LIPID_TRANSPORT	REACTOME_HDL_MEDIATED_LIPID_TRANSPORT	0.099555	0.449146	387	15	1	APOE
REACTOME_NRIF_SIGNALS_CELL_DEATH_FROM_THE_NUCLEUS	REACTOME_NRIF_SIGNALS_CELL_DEATH_FROM_THE_NUCLEUS	0.099555	0.449146	387	15	1	NGFR
REACTOME_SHC1_EVENTS_IN_EGFR_SIGNALING	REACTOME_SHC1_EVENTS_IN_EGFR_SIGNALING	0.099555	0.449146	387	15	1	EGFR
REACTOME_SYNTHESIS_SECRETION_AND_DEACYLATION_OF_GHRELIN	REACTOME_SYNTHESIS_SECRETION_AND_DEACYLATION_OF_GHRELIN	0.099555	0.449146	387	15	1	BCHE
REACTOME_TRAFFICKING_OF_GLUR2_CONTAINING_AMPA_RECEPTORS	REACTOME_TRAFFICKING_OF_GLUR2_CONTAINING_AMPA_RECEPTORS	0.099555	0.449146	387	15	1	AP2M1
REGULATION_OF_MEMBRANE_POTENTIAL	REGULATION_OF_MEMBRANE_POTENTIAL	0.099555	0.449146	387	15	1	IFI6
T_CELL_DIFFERENTIATION	T_CELL_DIFFERENTIATION	0.099555	0.449146	387	15	1	SPINK5
VESICLE_COAT	VESICLE_COAT	0.099555	0.449146	387	15	1	EGFR
NEGATIVE_REGULATION_OF_CELL_CYCLE	NEGATIVE_REGULATION_OF_CELL_CYCLE	0.100813	0.453947	387	77	2	LATS2	TP53
BIOCARTA_GATA3_PATHWAY	BIOCARTA_GATA3_PATHWAY	0.105829	0.458072	387	16	1	NFATC2
BIOCARTA_IL22BP_PATHWAY	BIOCARTA_IL22BP_PATHWAY	0.105829	0.458072	387	16	1	STAT5A
BIOCARTA_P53_PATHWAY	BIOCARTA_P53_PATHWAY	0.105829	0.458072	387	16	1	TP53
BIOCARTA_SHH_PATHWAY	BIOCARTA_SHH_PATHWAY	0.105829	0.458072	387	16	1	SMO
CELL_MATURATION	CELL_MATURATION	0.105829	0.458072	387	16	1	AGRN
CHROMATIN_ASSEMBLY	CHROMATIN_ASSEMBLY	0.105829	0.458072	387	16	1	NAP1L2
COATED_MEMBRANE	COATED_MEMBRANE	0.105829	0.458072	387	16	1	EGFR
COATED_VESICLE_MEMBRANE	COATED_VESICLE_MEMBRANE	0.105829	0.458072	387	16	1	EGFR
KEGG_HUNTINGTONS_DISEASE	KEGG_HUNTINGTONS_DISEASE	0.103056	0.458072	387	161	3	AP2M1	PLCB3	TP53
MEMBRANE_COAT	MEMBRANE_COAT	0.105829	0.458072	387	16	1	EGFR
MICROTUBULE_MOTOR_ACTIVITY	MICROTUBULE_MOTOR_ACTIVITY	0.105829	0.458072	387	16	1	KIFC3
MORPHOGENESIS_OF_AN_EPITHELIUM	MORPHOGENESIS_OF_AN_EPITHELIUM	0.105829	0.458072	387	16	1	SPINK5
MYOSIN_COMPLEX	MYOSIN_COMPLEX	0.105829	0.458072	387	16	1	MYL9
OXIDOREDUCTASE_ACTIVITY_ACTING_ON_THE_ALDEHYDE_OR_OXO_GROUP_OF_DONORSNAD_OR_NADP_AS_ACCEPTOR	OXIDOREDUCTASE_ACTIVITY_ACTING_ON_THE_ALDEHYDE_OR_OXO_GROUP_OF_DONORSNAD_OR_NADP_AS_ACCEPTOR	0.105829	0.458072	387	16	1	ALDH1A3
POSITIVE_REGULATION_OF_CELL_CYCLE	POSITIVE_REGULATION_OF_CELL_CYCLE	0.105829	0.458072	387	16	1	SPHK1
REACTOME_ACTIVATION_OF_BH3_ONLY_PROTEINS	REACTOME_ACTIVATION_OF_BH3_ONLY_PROTEINS	0.105829	0.458072	387	16	1	TP53
REACTOME_CHYLOMICRON_MEDIATED_LIPID_TRANSPORT	REACTOME_CHYLOMICRON_MEDIATED_LIPID_TRANSPORT	0.105829	0.458072	387	16	1	APOE
REACTOME_P75_NTR_RECEPTOR_MEDIATED_SIGNALLING	REACTOME_P75_NTR_RECEPTOR_MEDIATED_SIGNALLING	0.105218	0.458072	387	79	2	ARHGEF4	NGFR
REACTOME_REGULATION_OF_INSULIN_LIKE_GROWTH_FACTOR_IGF_ACTIVITY_BY_INSULIN_LIKE_GROWTH_FACTOR_BINDING_PROTEINS_IGFBPS	REACTOME_REGULATION_OF_INSULIN_LIKE_GROWTH_FACTOR_IGF_ACTIVITY_BY_INSULIN_LIKE_GROWTH_FACTOR_BINDING_PROTEINS_IGFBPS	0.105829	0.458072	387	16	1	IGF2
REGULATION_OF_PROTEIN_IMPORT_INTO_NUCLEUS	REGULATION_OF_PROTEIN_IMPORT_INTO_NUCLEUS	0.105829	0.458072	387	16	1	CDH1
SULFURIC_ESTER_HYDROLASE_ACTIVITY	SULFURIC_ESTER_HYDROLASE_ACTIVITY	0.105829	0.458072	387	16	1	SULF1
KEGG_ANTIGEN_PROCESSING_AND_PRESENTATION	KEGG_ANTIGEN_PROCESSING_AND_PRESENTATION	0.10744	0.464186	387	80	2	HLA-DRB1	HLA-DRB5
APICAL_PART_OF_CELL	APICAL_PART_OF_CELL	0.112059	0.471132	387	17	1	RHCG
BASE_EXCISION_REPAIR	BASE_EXCISION_REPAIR	0.112059	0.471132	387	17	1	TP53
BIOCARTA_IL10_PATHWAY	BIOCARTA_IL10_PATHWAY	0.112059	0.471132	387	17	1	STAT5A
BIOCARTA_IL7_PATHWAY	BIOCARTA_IL7_PATHWAY	0.112059	0.471132	387	17	1	STAT5A
CHROMATIN_REMODELING_COMPLEX	CHROMATIN_REMODELING_COMPLEX	0.112059	0.471132	387	17	1	NAP1L2
EMBRYONIC_MORPHOGENESIS	EMBRYONIC_MORPHOGENESIS	0.112059	0.471132	387	17	1	ZIC1
HORMONE_SECRETION	HORMONE_SECRETION	0.112059	0.471132	387	17	1	LIF
KEGG_RENIN_ANGIOTENSIN_SYSTEM	KEGG_RENIN_ANGIOTENSIN_SYSTEM	0.112059	0.471132	387	17	1	ENPEP
MICROTUBULE_BASED_PROCESS	MICROTUBULE_BASED_PROCESS	0.111921	0.471132	387	82	2	GSN	MAP3K11
NEGATIVE_REGULATION_OF_CELL_ADHESION	NEGATIVE_REGULATION_OF_CELL_ADHESION	0.112059	0.471132	387	17	1	TGFBI
POSITIVE_REGULATION_OF_TRANSFERASE_ACTIVITY	POSITIVE_REGULATION_OF_TRANSFERASE_ACTIVITY	0.111921	0.471132	387	82	2	EGFR	MAP3K11
REACTOME_NA_CL_DEPENDENT_NEUROTRANSMITTER_TRANSPORTERS	REACTOME_NA_CL_DEPENDENT_NEUROTRANSMITTER_TRANSPORTERS	0.112059	0.471132	387	17	1	SLC6A14
REACTOME_TIE2_SIGNALING	REACTOME_TIE2_SIGNALING	0.112059	0.471132	387	17	1	GRB14
REGULATION_OF_JNK_ACTIVITY	REGULATION_OF_JNK_ACTIVITY	0.112059	0.471132	387	17	1	MAP3K11
VITAMIN_METABOLIC_PROCESS	VITAMIN_METABOLIC_PROCESS	0.112059	0.471132	387	17	1	CYP27B1
REACTOME_L1CAM_INTERACTIONS	REACTOME_L1CAM_INTERACTIONS	0.114179	0.479185	387	83	2	AP2M1	EGFR
BIOCARTA_CARDIACEGF_PATHWAY	BIOCARTA_CARDIACEGF_PATHWAY	0.118247	0.483286	387	18	1	EGFR
BIOCARTA_NGF_PATHWAY	BIOCARTA_NGF_PATHWAY	0.118247	0.483286	387	18	1	NGFR
BIOCARTA_SPRY_PATHWAY	BIOCARTA_SPRY_PATHWAY	0.118247	0.483286	387	18	1	EGFR
CARBON_CARBON_LYASE_ACTIVITY	CARBON_CARBON_LYASE_ACTIVITY	0.118247	0.483286	387	18	1	MVD
INORGANIC_ANION_TRANSPORT	INORGANIC_ANION_TRANSPORT	0.118247	0.483286	387	18	1	CLIC3
KEGG_PHENYLALANINE_METABOLISM	KEGG_PHENYLALANINE_METABOLISM	0.118247	0.483286	387	18	1	ALDH1A3
LIPOPROTEIN_BINDING	LIPOPROTEIN_BINDING	0.118247	0.483286	387	18	1	CXCL16
PEPTIDASE_ACTIVITY	PEPTIDASE_ACTIVITY	0.116218	0.483286	387	170	3	ENPEP	HTRA1	USP2
PEPTIDE_BINDING	PEPTIDE_BINDING	0.116449	0.483286	387	84	2	CALCR	GRPR
REACTOME_REGULATION_OF_SIGNALING_BY_CBL	REACTOME_REGULATION_OF_SIGNALING_BY_CBL	0.118247	0.483286	387	18	1	LYN
REACTOME_SIGNALING_BY_CONSTITUTIVELY_ACTIVE_EGFR	REACTOME_SIGNALING_BY_CONSTITUTIVELY_ACTIVE_EGFR	0.118247	0.483286	387	18	1	EGFR
REACTOME_SIGNALING_BY_FGFR1_FUSION_MUTANTS	REACTOME_SIGNALING_BY_FGFR1_FUSION_MUTANTS	0.118247	0.483286	387	18	1	STAT5A
RESPONSE_TO_ABIOTIC_STIMULUS	RESPONSE_TO_ABIOTIC_STIMULUS	0.116449	0.483286	387	84	2	IVL	MC1R
SPINDLE_POLE	SPINDLE_POLE	0.118247	0.483286	387	18	1	LATS2
STEROID_BINDING	STEROID_BINDING	0.118247	0.483286	387	18	1	CAV1
KEGG_TGF_BETA_SIGNALING_PATHWAY	KEGG_TGF_BETA_SIGNALING_PATHWAY	0.118731	0.484423	387	85	2	BMP8B	ID4
BIOCARTA_ATM_PATHWAY	BIOCARTA_ATM_PATHWAY	0.124391	0.492109	387	19	1	TP53
BIOCARTA_CALCINEURIN_PATHWAY	BIOCARTA_CALCINEURIN_PATHWAY	0.124391	0.492109	387	19	1	NFATC2
BIOCARTA_CTLA4_PATHWAY	BIOCARTA_CTLA4_PATHWAY	0.124391	0.492109	387	19	1	HLA-DRB1
BIOCARTA_EPO_PATHWAY	BIOCARTA_EPO_PATHWAY	0.124391	0.492109	387	19	1	STAT5A
BIOCARTA_MEF2D_PATHWAY	BIOCARTA_MEF2D_PATHWAY	0.124391	0.492109	387	19	1	NFATC2
BIOCARTA_MTA3_PATHWAY	BIOCARTA_MTA3_PATHWAY	0.124391	0.492109	387	19	1	CDH1
BIOCARTA_NDKDYNAMIN_PATHWAY	BIOCARTA_NDKDYNAMIN_PATHWAY	0.124391	0.492109	387	19	1	AP2M1
BIOCARTA_TGFB_PATHWAY	BIOCARTA_TGFB_PATHWAY	0.124391	0.492109	387	19	1	CDH1
BIOCARTA_TH1TH2_PATHWAY	BIOCARTA_TH1TH2_PATHWAY	0.124391	0.492109	387	19	1	HLA-DRB1
CELL_RECOGNITION	CELL_RECOGNITION	0.124391	0.492109	387	19	1	MICB
CELLULAR_RESPONSE_TO_STIMULUS	CELLULAR_RESPONSE_TO_STIMULUS	0.124391	0.492109	387	19	1	TP53
INSULIN_RECEPTOR_SIGNALING_PATHWAY	INSULIN_RECEPTOR_SIGNALING_PATHWAY	0.124391	0.492109	387	19	1	IGF2
INTEGRIN_COMPLEX	INTEGRIN_COMPLEX	0.124391	0.492109	387	19	1	ITGB4
INTRAMOLECULAR_OXIDOREDUCTASE_ACTIVITY	INTRAMOLECULAR_OXIDOREDUCTASE_ACTIVITY	0.124391	0.492109	387	19	1	PDIA2
KEGG_ERBB_SIGNALING_PATHWAY	KEGG_ERBB_SIGNALING_PATHWAY	0.121024	0.492109	387	86	2	EGFR	STAT5A
POSITIVE_REGULATION_OF_PROTEIN_AMINO_ACID_PHOSPHORYLATION	POSITIVE_REGULATION_OF_PROTEIN_AMINO_ACID_PHOSPHORYLATION	0.124391	0.492109	387	19	1	LYN
PROTEIN_POLYMERIZATION	PROTEIN_POLYMERIZATION	0.124391	0.492109	387	19	1	GSN
REGULATION_OF_MYELOID_CELL_DIFFERENTIATION	REGULATION_OF_MYELOID_CELL_DIFFERENTIATION	0.124391	0.492109	387	19	1	SCIN
KEGG_GAP_JUNCTION	KEGG_GAP_JUNCTION	0.125642	0.496221	387	88	2	EGFR	PLCB3
CARBOHYDRATE_METABOLIC_PROCESS	CARBOHYDRATE_METABOLIC_PROCESS	0.126866	0.500213	387	177	3	CHST11	CHST3	GFPT2
BIOCARTA_AMI_PATHWAY	BIOCARTA_AMI_PATHWAY	0.130492	0.501038	387	20	1	PROS1
BIOCARTA_ATRBRCA_PATHWAY	BIOCARTA_ATRBRCA_PATHWAY	0.130492	0.501038	387	20	1	TP53
HOMEOSTASIS_OF_NUMBER_OF_CELLS	HOMEOSTASIS_OF_NUMBER_OF_CELLS	0.130492	0.501038	387	20	1	LYN
KEGG_BIOSYNTHESIS_OF_UNSATURATED_FATTY_ACIDS	KEGG_BIOSYNTHESIS_OF_UNSATURATED_FATTY_ACIDS	0.130492	0.501038	387	20	1	HSD17B12
NUCLEOTIDE_EXCISION_REPAIR	NUCLEOTIDE_EXCISION_REPAIR	0.130492	0.501038	387	20	1	TP53
PHOSPHOINOSITIDE_BINDING	PHOSPHOINOSITIDE_BINDING	0.130492	0.501038	387	20	1	SCIN
POSITIVE_REGULATION_OF_SECRETION	POSITIVE_REGULATION_OF_SECRETION	0.130492	0.501038	387	20	1	SCIN
REACTOME_ENOS_ACTIVATION_AND_REGULATION	REACTOME_ENOS_ACTIVATION_AND_REGULATION	0.130492	0.501038	387	20	1	CAV1
REACTOME_G_ALPHA_Q_SIGNALLING_EVENTS	REACTOME_G_ALPHA_Q_SIGNALLING_EVENTS	0.128415	0.501038	387	178	3	GNA14	GRPR	PLCB3
REACTOME_G_BETA_GAMMA_SIGNALLING_THROUGH_PLC_BETA	REACTOME_G_BETA_GAMMA_SIGNALLING_THROUGH_PLC_BETA	0.130492	0.501038	387	20	1	PLCB3
REACTOME_HS_GAG_DEGRADATION	REACTOME_HS_GAG_DEGRADATION	0.130492	0.501038	387	20	1	AGRN
REACTOME_REGULATION_OF_INSULIN_SECRETION	REACTOME_REGULATION_OF_INSULIN_SECRETION	0.127966	0.501038	387	89	2	GNA14	PLCB3
REACTOME_RNA_POL_I_TRANSCRIPTION_TERMINATION	REACTOME_RNA_POL_I_TRANSCRIPTION_TERMINATION	0.130492	0.501038	387	20	1	TAF1C
REGULATION_OF_TRANSLATION	REGULATION_OF_TRANSLATION	0.130301	0.501038	387	90	2	IGF2BP2	SAMD4A
SECRETION	SECRETION	0.128415	0.501038	387	178	3	AQP3	LIF	SCIN
TRANSFERASE_ACTIVITY_TRANSFERRING_PENTOSYL_GROUPS	TRANSFERASE_ACTIVITY_TRANSFERRING_PENTOSYL_GROUPS	0.130492	0.501038	387	20	1	APRT
RNA_POLYMERASE_II_TRANSCRIPTION_FACTOR_ACTIVITY	RNA_POLYMERASE_II_TRANSCRIPTION_FACTOR_ACTIVITY	0.131533	0.504208	387	180	3	RUNX2	TAF1C	ZFPM2
LOCOMOTORY_BEHAVIOR	LOCOMOTORY_BEHAVIOR	0.132646	0.507645	387	91	2	CCL28	PLD1
AXON_GUIDANCE	AXON_GUIDANCE	0.136551	0.512558	387	21	1	FEZ1
BASAL_LAMINA	BASAL_LAMINA	0.136551	0.512558	387	21	1	AGRN
BIOCARTA_TFF_PATHWAY	BIOCARTA_TFF_PATHWAY	0.136551	0.512558	387	21	1	EGFR
EPIDERMAL_GROWTH_FACTOR_RECEPTOR_SIGNALING_PATHWAY	EPIDERMAL_GROWTH_FACTOR_RECEPTOR_SIGNALING_PATHWAY	0.136551	0.512558	387	21	1	EGFR
HYDROLASE_ACTIVITY_ACTING_ON_CARBON_NITROGEN_NOT_PEPTIDEBONDSIN_LINEAR_AMIDES	HYDROLASE_ACTIVITY_ACTING_ON_CARBON_NITROGEN_NOT_PEPTIDEBONDSIN_LINEAR_AMIDES	0.136551	0.512558	387	21	1	PDF
MITOCHONDRIAL_TRANSPORT	MITOCHONDRIAL_TRANSPORT	0.136551	0.512558	387	21	1	TP53
MONOVALENT_INORGANIC_CATION_TRANSPORT	MONOVALENT_INORGANIC_CATION_TRANSPORT	0.135	0.512558	387	92	2	KCNF1	KCNQ4
PROTEIN_HOMOOLIGOMERIZATION	PROTEIN_HOMOOLIGOMERIZATION	0.136551	0.512558	387	21	1	MUC20
REACTOME_CTLA4_INHIBITORY_SIGNALING	REACTOME_CTLA4_INHIBITORY_SIGNALING	0.136551	0.512558	387	21	1	LYN
REACTOME_NEF_MEDIATES_DOWN_MODULATION_OF_CELL_SURFACE_RECEPTORS_BY_RECRUITING_THEM_TO_CLATHRIN_ADAPTERS	REACTOME_NEF_MEDIATES_DOWN_MODULATION_OF_CELL_SURFACE_RECEPTORS_BY_RECRUITING_THEM_TO_CLATHRIN_ADAPTERS	0.136551	0.512558	387	21	1	AP2M1
RESPONSE_TO_DRUG	RESPONSE_TO_DRUG	0.136551	0.512558	387	21	1	ABCG2
TRANSCRIPTION_COREPRESSOR_ACTIVITY	TRANSCRIPTION_COREPRESSOR_ACTIVITY	0.135	0.512558	387	92	2	ID4	ZFPM2
ATPASE_ACTIVITY_COUPLED	ATPASE_ACTIVITY_COUPLED	0.137363	0.514783	387	93	2	ABCG2	SMARCA1
BIOCARTA_CHEMICAL_PATHWAY	BIOCARTA_CHEMICAL_PATHWAY	0.142568	0.522601	387	22	1	TP53
BIOCARTA_CSK_PATHWAY	BIOCARTA_CSK_PATHWAY	0.142568	0.522601	387	22	1	HLA-DRB1
BIOCARTA_HER2_PATHWAY	BIOCARTA_HER2_PATHWAY	0.142568	0.522601	387	22	1	EGFR
BIOCARTA_IL2_PATHWAY	BIOCARTA_IL2_PATHWAY	0.142568	0.522601	387	22	1	STAT5A
DNA_DEPENDENT_ATPASE_ACTIVITY	DNA_DEPENDENT_ATPASE_ACTIVITY	0.142568	0.522601	387	22	1	SMARCA1
ENDOPLASMIC_RETICULUM_PART	ENDOPLASMIC_RETICULUM_PART	0.139736	0.522601	387	94	2	MBTPS1	SPINK5
HEPARIN_BINDING	HEPARIN_BINDING	0.142568	0.522601	387	22	1	FSTL1
MAINTENANCE_OF_LOCALIZATION	MAINTENANCE_OF_LOCALIZATION	0.142568	0.522601	387	22	1	PDIA2
OXIDOREDUCTASE_ACTIVITY_ACTING_ON_THE_ALDEHYDE_OR_OXO_GROUP_OF_DONORS	OXIDOREDUCTASE_ACTIVITY_ACTING_ON_THE_ALDEHYDE_OR_OXO_GROUP_OF_DONORS	0.142568	0.522601	387	22	1	ALDH1A3
REACTOME_CIRCADIAN_REPRESSION_OF_EXPRESSION_BY_REV_ERBA	REACTOME_CIRCADIAN_REPRESSION_OF_EXPRESSION_BY_REV_ERBA	0.142568	0.522601	387	22	1	ELOVL3
REACTOME_FGFR_LIGAND_BINDING_AND_ACTIVATION	REACTOME_FGFR_LIGAND_BINDING_AND_ACTIVATION	0.142568	0.522601	387	22	1	FGFR3
REACTOME_GRB2_EVENTS_IN_ERBB2_SIGNALING	REACTOME_GRB2_EVENTS_IN_ERBB2_SIGNALING	0.142568	0.522601	387	22	1	EGFR
REACTOME_SIGNALING_BY_BMP	REACTOME_SIGNALING_BY_BMP	0.142568	0.522601	387	22	1	FSTL1
REGULATION_OF_NUCLEOCYTOPLASMIC_TRANSPORT	REGULATION_OF_NUCLEOCYTOPLASMIC_TRANSPORT	0.142568	0.522601	387	22	1	CDH1
REACTOME_SIGNALING_BY_NOTCH	REACTOME_SIGNALING_BY_NOTCH	0.144507	0.528884	387	96	2	DTX1	TP53
ACTIN_POLYMERIZATION_AND_OR_DEPOLYMERIZATION	ACTIN_POLYMERIZATION_AND_OR_DEPOLYMERIZATION	0.148543	0.530414	387	23	1	GSN
ADHERENS_JUNCTION	ADHERENS_JUNCTION	0.148543	0.530414	387	23	1	CDH1
BIOCARTA_CTCF_PATHWAY	BIOCARTA_CTCF_PATHWAY	0.148543	0.530414	387	23	1	TP53
BIOCARTA_GLEEVEC_PATHWAY	BIOCARTA_GLEEVEC_PATHWAY	0.148543	0.530414	387	23	1	STAT5A
BIOCARTA_INTRINSIC_PATHWAY	BIOCARTA_INTRINSIC_PATHWAY	0.148543	0.530414	387	23	1	PROS1
BIOCARTA_P53HYPOXIA_PATHWAY	BIOCARTA_P53HYPOXIA_PATHWAY	0.148543	0.530414	387	23	1	TP53
BIOCARTA_RAS_PATHWAY	BIOCARTA_RAS_PATHWAY	0.148543	0.530414	387	23	1	PLD1
COLLAGEN	COLLAGEN	0.148543	0.530414	387	23	1	COL5A1
CONTRACTILE_FIBER_PART	CONTRACTILE_FIBER_PART	0.148543	0.530414	387	23	1	MYL9
POSITIVE_REGULATION_OF_TRANSPORT	POSITIVE_REGULATION_OF_TRANSPORT	0.148543	0.530414	387	23	1	CDH1
REACTOME_ADHERENS_JUNCTIONS_INTERACTIONS	REACTOME_ADHERENS_JUNCTIONS_INTERACTIONS	0.148543	0.530414	387	23	1	CDH1
REACTOME_PRE_NOTCH_TRANSCRIPTION_AND_TRANSLATION	REACTOME_PRE_NOTCH_TRANSCRIPTION_AND_TRANSLATION	0.148543	0.530414	387	23	1	TP53
REACTOME_SULFUR_AMINO_ACID_METABOLISM	REACTOME_SULFUR_AMINO_ACID_METABOLISM	0.148543	0.530414	387	23	1	CBS
REACTOME_THROMBOXANE_SIGNALLING_THROUGH_TP_RECEPTOR	REACTOME_THROMBOXANE_SIGNALLING_THROUGH_TP_RECEPTOR	0.148543	0.530414	387	23	1	GNA14
REACTOME_YAP1_AND_WWTR1_TAZ_STIMULATED_GENE_EXPRESSION	REACTOME_YAP1_AND_WWTR1_TAZ_STIMULATED_GENE_EXPRESSION	0.148543	0.530414	387	23	1	RUNX2
REGULATION_OF_MITOTIC_CELL_CYCLE	REGULATION_OF_MITOTIC_CELL_CYCLE	0.148543	0.530414	387	23	1	SPHK1
BIOCARTA_ECM_PATHWAY	BIOCARTA_ECM_PATHWAY	0.154477	0.54661	387	24	1	GSN
BIOCARTA_G2_PATHWAY	BIOCARTA_G2_PATHWAY	0.154477	0.54661	387	24	1	TP53
BIOCARTA_TPO_PATHWAY	BIOCARTA_TPO_PATHWAY	0.154477	0.54661	387	24	1	STAT5A
G_PROTEIN_SIGNALING_COUPLED_TO_CYCLIC_NUCLEOTIDE_SECOND_MESSENGER	G_PROTEIN_SIGNALING_COUPLED_TO_CYCLIC_NUCLEOTIDE_SECOND_MESSENGER	0.15415	0.54661	387	100	2	CALCR	MC1R
KEGG_DORSO_VENTRAL_AXIS_FORMATION	KEGG_DORSO_VENTRAL_AXIS_FORMATION	0.154477	0.54661	387	24	1	EGFR
REACTOME_RNA_POL_I_TRANSCRIPTION_INITIATION	REACTOME_RNA_POL_I_TRANSCRIPTION_INITIATION	0.154477	0.54661	387	24	1	TAF1C
MAPKKK_CASCADE_GO_0000165	MAPKKK_CASCADE_GO_0000165	0.156579	0.553216	387	101	2	FGFR3	MAP3K11
BIOCARTA_MCALPAIN_PATHWAY	BIOCARTA_MCALPAIN_PATHWAY	0.160369	0.554905	387	25	1	EGFR
CONTRACTILE_FIBER	CONTRACTILE_FIBER	0.160369	0.554905	387	25	1	MYL9
CYCLIC_NUCLEOTIDE_MEDIATED_SIGNALING	CYCLIC_NUCLEOTIDE_MEDIATED_SIGNALING	0.159016	0.554905	387	102	2	CALCR	MC1R
EXOCYTOSIS	EXOCYTOSIS	0.160369	0.554905	387	25	1	SCIN
EXTRINSIC_TO_MEMBRANE	EXTRINSIC_TO_MEMBRANE	0.160369	0.554905	387	25	1	GNA14
G_PROTEIN_SIGNALING_ADENYLATE_CYCLASE_ACTIVATING_PATHWAY	G_PROTEIN_SIGNALING_ADENYLATE_CYCLASE_ACTIVATING_PATHWAY	0.160369	0.554905	387	25	1	CALCR
KEGG_SELENOAMINO_ACID_METABOLISM	KEGG_SELENOAMINO_ACID_METABOLISM	0.160369	0.554905	387	25	1	CBS
NITROGEN_COMPOUND_BIOSYNTHETIC_PROCESS	NITROGEN_COMPOUND_BIOSYNTHETIC_PROCESS	0.160369	0.554905	387	25	1	EGFR
POSITIVE_REGULATION_OF_CELL_DIFFERENTIATION	POSITIVE_REGULATION_OF_CELL_DIFFERENTIATION	0.160369	0.554905	387	25	1	SCIN
REACTOME_A_TETRASACCHARIDE_LINKER_SEQUENCE_IS_REQUIRED_FOR_GAG_SYNTHESIS	REACTOME_A_TETRASACCHARIDE_LINKER_SEQUENCE_IS_REQUIRED_FOR_GAG_SYNTHESIS	0.160369	0.554905	387	25	1	AGRN
REACTOME_ADP_SIGNALLING_THROUGH_P2RY1	REACTOME_ADP_SIGNALLING_THROUGH_P2RY1	0.160369	0.554905	387	25	1	GNA14
REACTOME_SYNTHESIS_OF_PA	REACTOME_SYNTHESIS_OF_PA	0.160369	0.554905	387	25	1	PLD1
REGULATION_OF_ANATOMICAL_STRUCTURE_MORPHOGENESIS	REGULATION_OF_ANATOMICAL_STRUCTURE_MORPHOGENESIS	0.160369	0.554905	387	25	1	APOE
REGULATION_OF_INTRACELLULAR_TRANSPORT	REGULATION_OF_INTRACELLULAR_TRANSPORT	0.160369	0.554905	387	25	1	CDH1
REACTOME_PPARA_ACTIVATES_GENE_EXPRESSION	REACTOME_PPARA_ACTIVATES_GENE_EXPRESSION	0.16146	0.557859	387	103	2	ANGPTL4	CD36
CYTOSOL	CYTOSOL	0.162391	0.560248	387	199	3	GSN	SPHK1	SPINK5
ACTIN_CYTOSKELETON_ORGANIZATION_AND_BIOGENESIS	ACTIN_CYTOSKELETON_ORGANIZATION_AND_BIOGENESIS	0.163911	0.563205	387	104	2	GSN	SCIN
BIOCARTA_BAD_PATHWAY	BIOCARTA_BAD_PATHWAY	0.16622	0.563205	387	26	1	KIT
CASPASE_ACTIVATION	CASPASE_ACTIVATION	0.16622	0.563205	387	26	1	TP53
CHROMATIN_ASSEMBLY_OR_DISASSEMBLY	CHROMATIN_ASSEMBLY_OR_DISASSEMBLY	0.16622	0.563205	387	26	1	NAP1L2
KEGG_GALACTOSE_METABOLISM	KEGG_GALACTOSE_METABOLISM	0.16622	0.563205	387	26	1	PFKP
KEGG_O_GLYCAN_BIOSYNTHESIS	KEGG_O_GLYCAN_BIOSYNTHESIS	0.16622	0.563205	387	26	1	GALNT12
KEGG_PENTOSE_PHOSPHATE_PATHWAY	KEGG_PENTOSE_PHOSPHATE_PATHWAY	0.16622	0.563205	387	26	1	PFKP
LYMPHOCYTE_DIFFERENTIATION	LYMPHOCYTE_DIFFERENTIATION	0.16622	0.563205	387	26	1	SPINK5
REACTOME_ACTIVATED_NOTCH1_TRANSMITS_SIGNAL_TO_THE_NUCLEUS	REACTOME_ACTIVATED_NOTCH1_TRANSMITS_SIGNAL_TO_THE_NUCLEUS	0.16622	0.563205	387	26	1	DTX1
REACTOME_BASIGIN_INTERACTIONS	REACTOME_BASIGIN_INTERACTIONS	0.16622	0.563205	387	26	1	CAV1
REACTOME_RECYCLING_PATHWAY_OF_L1	REACTOME_RECYCLING_PATHWAY_OF_L1	0.16622	0.563205	387	26	1	AP2M1
REACTOME_SEMA4D_INDUCED_CELL_MIGRATION_AND_GROWTH_CONE_COLLAPSE	REACTOME_SEMA4D_INDUCED_CELL_MIGRATION_AND_GROWTH_CONE_COLLAPSE	0.16622	0.563205	387	26	1	MYL9
REACTOME_SIGNALING_BY_EGFR_IN_CANCER	REACTOME_SIGNALING_BY_EGFR_IN_CANCER	0.166369	0.563205	387	105	2	AP2M1	EGFR
REACTOME_SIGNALING_BY_ILS	REACTOME_SIGNALING_BY_ILS	0.168833	0.570723	387	106	2	LYN	STAT5A
BIOCARTA_EDG1_PATHWAY	BIOCARTA_EDG1_PATHWAY	0.172031	0.570841	387	27	1	SPHK1
BIOCARTA_VIP_PATHWAY	BIOCARTA_VIP_PATHWAY	0.172031	0.570841	387	27	1	NFATC2
CYTOPLASMIC_VESICLE_MEMBRANE	CYTOPLASMIC_VESICLE_MEMBRANE	0.172031	0.570841	387	27	1	EGFR
CYTOPLASMIC_VESICLE_PART	CYTOPLASMIC_VESICLE_PART	0.172031	0.570841	387	27	1	EGFR
G1_S_TRANSITION_OF_MITOTIC_CELL_CYCLE	G1_S_TRANSITION_OF_MITOTIC_CELL_CYCLE	0.172031	0.570841	387	27	1	LATS2
HYDRO_LYASE_ACTIVITY	HYDRO_LYASE_ACTIVITY	0.172031	0.570841	387	27	1	CBS
KEGG_HISTIDINE_METABOLISM	KEGG_HISTIDINE_METABOLISM	0.172031	0.570841	387	27	1	ALDH1A3
NEGATIVE_REGULATION_OF_CELL_DIFFERENTIATION	NEGATIVE_REGULATION_OF_CELL_DIFFERENTIATION	0.172031	0.570841	387	27	1	DTX1
POSITIVE_REGULATION_OF_PROTEIN_MODIFICATION_PROCESS	POSITIVE_REGULATION_OF_PROTEIN_MODIFICATION_PROCESS	0.172031	0.570841	387	27	1	LYN
REACTOME_GLYCOLYSIS	REACTOME_GLYCOLYSIS	0.172031	0.570841	387	27	1	PFKP
REACTOME_SPHINGOLIPID_DE_NOVO_BIOSYNTHESIS	REACTOME_SPHINGOLIPID_DE_NOVO_BIOSYNTHESIS	0.172031	0.570841	387	27	1	SPHK1
REACTOME_STRIATED_MUSCLE_CONTRACTION	REACTOME_STRIATED_MUSCLE_CONTRACTION	0.172031	0.570841	387	27	1	TNNI2
REACTOME_TRAFFICKING_OF_AMPA_RECEPTORS	REACTOME_TRAFFICKING_OF_AMPA_RECEPTORS	0.172031	0.570841	387	27	1	AP2M1
BIOCARTA_G1_PATHWAY	BIOCARTA_G1_PATHWAY	0.177801	0.579336	387	28	1	TP53
BIOCARTA_GH_PATHWAY	BIOCARTA_GH_PATHWAY	0.177801	0.579336	387	28	1	STAT5A
BIOCARTA_INFLAM_PATHWAY	BIOCARTA_INFLAM_PATHWAY	0.177801	0.579336	387	28	1	HLA-DRB1
DOUBLE_STRANDED_DNA_BINDING	DOUBLE_STRANDED_DNA_BINDING	0.177801	0.579336	387	28	1	TP53
GAMETE_GENERATION	GAMETE_GENERATION	0.176261	0.579336	387	109	2	NR6A1	RPL39L
MOTOR_ACTIVITY	MOTOR_ACTIVITY	0.177801	0.579336	387	28	1	KIFC3
REACTOME_BIOSYNTHESIS_OF_THE_N_GLYCAN_PRECURSOR_DOLICHOL_LIPID_LINKED_OLIGOSACCHARIDE_LLO_AND_TRANSFER_TO_A_NASCENT_PROTEIN	REACTOME_BIOSYNTHESIS_OF_THE_N_GLYCAN_PRECURSOR_DOLICHOL_LIPID_LINKED_OLIGOSACCHARIDE_LLO_AND_TRANSFER_TO_A_NASCENT_PROTEIN	0.177801	0.579336	387	28	1	GFPT2
REACTOME_G_PROTEIN_BETA_GAMMA_SIGNALLING	REACTOME_G_PROTEIN_BETA_GAMMA_SIGNALLING	0.177801	0.579336	387	28	1	PLCB3
REACTOME_LIPOPROTEIN_METABOLISM	REACTOME_LIPOPROTEIN_METABOLISM	0.177801	0.579336	387	28	1	APOE
REACTOME_SHC_MEDIATED_CASCADE	REACTOME_SHC_MEDIATED_CASCADE	0.177801	0.579336	387	28	1	FGFR3
REACTOME_THE_ROLE_OF_NEF_IN_HIV1_REPLICATION_AND_DISEASE_PATHOGENESIS	REACTOME_THE_ROLE_OF_NEF_IN_HIV1_REPLICATION_AND_DISEASE_PATHOGENESIS	0.177801	0.579336	387	28	1	AP2M1
REGULATION_OF_T_CELL_ACTIVATION	REGULATION_OF_T_CELL_ACTIVATION	0.177801	0.579336	387	28	1	SPINK5
SPHINGOLIPID_METABOLIC_PROCESS	SPHINGOLIPID_METABOLIC_PROCESS	0.177801	0.579336	387	28	1	SPHK1
AMINO_ACID_TRANSMEMBRANE_TRANSPORTER_ACTIVITY	AMINO_ACID_TRANSMEMBRANE_TRANSPORTER_ACTIVITY	0.183531	0.585007	387	29	1	SLC6A14
ATPASE_ACTIVITY	ATPASE_ACTIVITY	0.181241	0.585007	387	111	2	ABCG2	SMARCA1
BIOCARTA_HDAC_PATHWAY	BIOCARTA_HDAC_PATHWAY	0.183531	0.585007	387	29	1	NFATC2
BIOCARTA_VEGF_PATHWAY	BIOCARTA_VEGF_PATHWAY	0.183531	0.585007	387	29	1	FLT4
BONE_REMODELING	BONE_REMODELING	0.183531	0.585007	387	29	1	RUNX2
GENERATION_OF_A_SIGNAL_INVOLVED_IN_CELL_CELL_SIGNALING	GENERATION_OF_A_SIGNAL_INVOLVED_IN_CELL_CELL_SIGNALING	0.183531	0.585007	387	29	1	LIF
INTEGRIN_BINDING	INTEGRIN_BINDING	0.183531	0.585007	387	29	1	TGFBI
NEGATIVE_REGULATION_OF_CELLULAR_COMPONENT_ORGANIZATION_AND_BIOGENESIS	NEGATIVE_REGULATION_OF_CELLULAR_COMPONENT_ORGANIZATION_AND_BIOGENESIS	0.183531	0.585007	387	29	1	GSN
RAS_GTPASE_ACTIVATOR_ACTIVITY	RAS_GTPASE_ACTIVATOR_ACTIVITY	0.183531	0.585007	387	29	1	RASAL1
REACTOME_ANTIGEN_ACTIVATES_B_CELL_RECEPTOR_LEADING_TO_GENERATION_OF_SECOND_MESSENGERS	REACTOME_ANTIGEN_ACTIVATES_B_CELL_RECEPTOR_LEADING_TO_GENERATION_OF_SECOND_MESSENGERS	0.183531	0.585007	387	29	1	LYN
REACTOME_INTRINSIC_PATHWAY_FOR_APOPTOSIS	REACTOME_INTRINSIC_PATHWAY_FOR_APOPTOSIS	0.183531	0.585007	387	29	1	TP53
REACTOME_SIGNALING_BY_FGFR1_MUTANTS	REACTOME_SIGNALING_BY_FGFR1_MUTANTS	0.183531	0.585007	387	29	1	STAT5A
REACTOME_STEROID_HORMONES	REACTOME_STEROID_HORMONES	0.183531	0.585007	387	29	1	CYP27B1
REGULATION_OF_CYTOSKELETON_ORGANIZATION_AND_BIOGENESIS	REGULATION_OF_CYTOSKELETON_ORGANIZATION_AND_BIOGENESIS	0.183531	0.585007	387	29	1	GSN
RESPONSE_TO_NUTRIENT_LEVELS	RESPONSE_TO_NUTRIENT_LEVELS	0.183531	0.585007	387	29	1	TP53
VESICLE_MEMBRANE	VESICLE_MEMBRANE	0.183531	0.585007	387	29	1	EGFR
ACTIN_FILAMENT_BASED_PROCESS	ACTIN_FILAMENT_BASED_PROCESS	0.18875	0.595858	387	114	2	GSN	SCIN
BIOCARTA_FAS_PATHWAY	BIOCARTA_FAS_PATHWAY	0.189222	0.595858	387	30	1	FAS
ENDOPEPTIDASE_ACTIVITY	ENDOPEPTIDASE_ACTIVITY	0.18875	0.595858	387	114	2	HTRA1	USP2
KEGG_ETHER_LIPID_METABOLISM	KEGG_ETHER_LIPID_METABOLISM	0.189222	0.595858	387	30	1	PLD1
POSITIVE_REGULATION_OF_CASPASE_ACTIVITY	POSITIVE_REGULATION_OF_CASPASE_ACTIVITY	0.189222	0.595858	387	30	1	TP53
PROTEIN_AMINO_ACID_AUTOPHOSPHORYLATION	PROTEIN_AMINO_ACID_AUTOPHOSPHORYLATION	0.189222	0.595858	387	30	1	MAP3K11
PROTEIN_AMINO_ACID_N_LINKED_GLYCOSYLATION	PROTEIN_AMINO_ACID_N_LINKED_GLYCOSYLATION	0.189222	0.595858	387	30	1	CD37
REGULATION_OF_GENE_EXPRESSION_EPIGENETIC	REGULATION_OF_GENE_EXPRESSION_EPIGENETIC	0.189222	0.595858	387	30	1	IGF2
TISSUE_REMODELING	TISSUE_REMODELING	0.189222	0.595858	387	30	1	RUNX2
ANION_TRANSPORT	ANION_TRANSPORT	0.194873	0.598391	387	31	1	CLIC3
BIOCARTA_MYOSIN_PATHWAY	BIOCARTA_MYOSIN_PATHWAY	0.194873	0.598391	387	31	1	ARHGEF4
CARBON_OXYGEN_LYASE_ACTIVITY	CARBON_OXYGEN_LYASE_ACTIVITY	0.194873	0.598391	387	31	1	CBS
EXOPEPTIDASE_ACTIVITY	EXOPEPTIDASE_ACTIVITY	0.194873	0.598391	387	31	1	ENPEP
METAL_ION_TRANSPORT	METAL_ION_TRANSPORT	0.19378	0.598391	387	116	2	KCNF1	KCNQ4
MICROTUBULE	MICROTUBULE	0.194873	0.598391	387	31	1	MAP3K11
NEGATIVE_REGULATION_OF_MULTICELLULAR_ORGANISMAL_PROCESS	NEGATIVE_REGULATION_OF_MULTICELLULAR_ORGANISMAL_PROCESS	0.194873	0.598391	387	31	1	SPINK5
PROTEIN_AUTOPROCESSING	PROTEIN_AUTOPROCESSING	0.194873	0.598391	387	31	1	MAP3K11
REACTOME_ACTIVATION_OF_KAINATE_RECEPTORS_UPON_GLUTAMATE_BINDING	REACTOME_ACTIVATION_OF_KAINATE_RECEPTORS_UPON_GLUTAMATE_BINDING	0.194873	0.598391	387	31	1	PLCB3
REACTOME_AMINO_ACID_TRANSPORT_ACROSS_THE_PLASMA_MEMBRANE	REACTOME_AMINO_ACID_TRANSPORT_ACROSS_THE_PLASMA_MEMBRANE	0.194873	0.598391	387	31	1	SLC6A14
REACTOME_CD28_CO_STIMULATION	REACTOME_CD28_CO_STIMULATION	0.194873	0.598391	387	31	1	LYN
REACTOME_GPVI_MEDIATED_ACTIVATION_CASCADE	REACTOME_GPVI_MEDIATED_ACTIVATION_CASCADE	0.194873	0.598391	387	31	1	LYN
REACTOME_HS_GAG_BIOSYNTHESIS	REACTOME_HS_GAG_BIOSYNTHESIS	0.194873	0.598391	387	31	1	AGRN
REACTOME_INTEGRATION_OF_ENERGY_METABOLISM	REACTOME_INTEGRATION_OF_ENERGY_METABOLISM	0.19378	0.598391	387	116	2	GNA14	PLCB3
REACTOME_LATENT_INFECTION_OF_HOMO_SAPIENS_WITH_MYCOBACTERIUM_TUBERCULOSIS	REACTOME_LATENT_INFECTION_OF_HOMO_SAPIENS_WITH_MYCOBACTERIUM_TUBERCULOSIS	0.194873	0.598391	387	31	1	NCF2
REACTOME_SEMA4D_IN_SEMAPHORIN_SIGNALING	REACTOME_SEMA4D_IN_SEMAPHORIN_SIGNALING	0.194873	0.598391	387	31	1	MYL9
REACTOME_SIGNAL_AMPLIFICATION	REACTOME_SIGNAL_AMPLIFICATION	0.194873	0.598391	387	31	1	GNA14
REACTOME_TRANSPORT_OF_VITAMINS_NUCLEOSIDES_AND_RELATED_MOLECULES	REACTOME_TRANSPORT_OF_VITAMINS_NUCLEOSIDES_AND_RELATED_MOLECULES	0.194873	0.598391	387	31	1	SLCO4A1
RESPONSE_TO_BIOTIC_STIMULUS	RESPONSE_TO_BIOTIC_STIMULUS	0.191263	0.598391	387	115	2	IFI44	TP53
BIOCARTA_PDGF_PATHWAY	BIOCARTA_PDGF_PATHWAY	0.200484	0.607669	387	32	1	STAT5A
BIOCARTA_RHO_PATHWAY	BIOCARTA_RHO_PATHWAY	0.200484	0.607669	387	32	1	GSN
CELLULAR_PROTEIN_COMPLEX_ASSEMBLY	CELLULAR_PROTEIN_COMPLEX_ASSEMBLY	0.200484	0.607669	387	32	1	AGRN
CHROMATIN_BINDING	CHROMATIN_BINDING	0.200484	0.607669	387	32	1	TP53
GENERAL_RNA_POLYMERASE_II_TRANSCRIPTION_FACTOR_ACTIVITY	GENERAL_RNA_POLYMERASE_II_TRANSCRIPTION_FACTOR_ACTIVITY	0.200484	0.607669	387	32	1	TAF1C
KEGG_ALANINE_ASPARTATE_AND_GLUTAMATE_METABOLISM	KEGG_ALANINE_ASPARTATE_AND_GLUTAMATE_METABOLISM	0.200484	0.607669	387	32	1	GFPT2
POSITIVE_REGULATION_OF_TRANSCRIPTIONDNA_DEPENDENT	POSITIVE_REGULATION_OF_TRANSCRIPTIONDNA_DEPENDENT	0.198826	0.607669	387	118	2	SMARCA1	TP53
REACTOME_FORMATION_OF_FIBRIN_CLOT_CLOTTING_CASCADE	REACTOME_FORMATION_OF_FIBRIN_CLOT_CLOTTING_CASCADE	0.200484	0.607669	387	32	1	PROS1
REACTOME_THROMBIN_SIGNALLING_THROUGH_PROTEINASE_ACTIVATED_RECEPTORS_PARS	REACTOME_THROMBIN_SIGNALLING_THROUGH_PROTEINASE_ACTIVATED_RECEPTORS_PARS	0.200484	0.607669	387	32	1	GNA14
REGULATION_OF_IMMUNE_RESPONSE	REGULATION_OF_IMMUNE_RESPONSE	0.200484	0.607669	387	32	1	SPINK5
BIOCARTA_AT1R_PATHWAY	BIOCARTA_AT1R_PATHWAY	0.206057	0.616593	387	33	1	EGFR
GLYCOSAMINOGLYCAN_BINDING	GLYCOSAMINOGLYCAN_BINDING	0.206057	0.616593	387	33	1	FSTL1
POSITIVE_REGULATION_OF_RNA_METABOLIC_PROCESS	POSITIVE_REGULATION_OF_RNA_METABOLIC_PROCESS	0.203888	0.616593	387	120	2	SMARCA1	TP53
REACTOME_ION_TRANSPORT_BY_P_TYPE_ATPASES	REACTOME_ION_TRANSPORT_BY_P_TYPE_ATPASES	0.206057	0.616593	387	33	1	ATP10A
REACTOME_PURINE_METABOLISM	REACTOME_PURINE_METABOLISM	0.206057	0.616593	387	33	1	APRT
RECEPTOR_MEDIATED_ENDOCYTOSIS	RECEPTOR_MEDIATED_ENDOCYTOSIS	0.206057	0.616593	387	33	1	FOLR1
RECEPTOR_SIGNALING_PROTEIN_SERINE_THREONINE_KINASE_ACTIVITY	RECEPTOR_SIGNALING_PROTEIN_SERINE_THREONINE_KINASE_ACTIVITY	0.206057	0.616593	387	33	1	MAP3K11
RESPONSE_TO_EXTRACELLULAR_STIMULUS	RESPONSE_TO_EXTRACELLULAR_STIMULUS	0.206057	0.616593	387	33	1	TP53
SINGLE_STRANDED_DNA_BINDING	SINGLE_STRANDED_DNA_BINDING	0.206057	0.616593	387	33	1	TP53
STRUCTURAL_CONSTITUENT_OF_MUSCLE	STRUCTURAL_CONSTITUENT_OF_MUSCLE	0.206057	0.616593	387	33	1	MYL9
ACTIVE_TRANSMEMBRANE_TRANSPORTER_ACTIVITY	ACTIVE_TRANSMEMBRANE_TRANSPORTER_ACTIVITY	0.208965	0.623704	387	122	2	ABCG2	SLC6A14
REACTOME_SIGNALING_BY_FGFR_IN_DISEASE	REACTOME_SIGNALING_BY_FGFR_IN_DISEASE	0.208965	0.623704	387	122	2	FGFR3	STAT5A
BASOLATERAL_PLASMA_MEMBRANE	BASOLATERAL_PLASMA_MEMBRANE	0.21159	0.626756	387	34	1	MUC20
BIOCARTA_MPR_PATHWAY	BIOCARTA_MPR_PATHWAY	0.21159	0.626756	387	34	1	PGR
KEGG_CYSTEINE_AND_METHIONINE_METABOLISM	KEGG_CYSTEINE_AND_METHIONINE_METABOLISM	0.21159	0.626756	387	34	1	CBS
KEGG_FRUCTOSE_AND_MANNOSE_METABOLISM	KEGG_FRUCTOSE_AND_MANNOSE_METABOLISM	0.21159	0.626756	387	34	1	PFKP
POSITIVE_REGULATION_OF_TRANSLATION	POSITIVE_REGULATION_OF_TRANSLATION	0.21159	0.626756	387	34	1	SAMD4A
REACTOME_METABOLISM_OF_STEROID_HORMONES_AND_VITAMINS_A_AND_D	REACTOME_METABOLISM_OF_STEROID_HORMONES_AND_VITAMINS_A_AND_D	0.21159	0.626756	387	34	1	CYP27B1
KEGG_CELL_CYCLE	KEGG_CELL_CYCLE	0.214054	0.633254	387	124	2	SFN	TP53
BIOCARTA_AGR_PATHWAY	BIOCARTA_AGR_PATHWAY	0.217086	0.634225	387	35	1	EGFR
BIOCARTA_CARM_ER_PATHWAY	BIOCARTA_CARM_ER_PATHWAY	0.217086	0.634225	387	35	1	HIST2H3C
BIOCARTA_GPCR_PATHWAY	BIOCARTA_GPCR_PATHWAY	0.217086	0.634225	387	35	1	NFATC2
DNA_PACKAGING	DNA_PACKAGING	0.217086	0.634225	387	35	1	NAP1L2
KEGG_NEUROTROPHIN_SIGNALING_PATHWAY	KEGG_NEUROTROPHIN_SIGNALING_PATHWAY	0.216603	0.634225	387	125	2	NGFR	TP53
KEGG_PRION_DISEASES	KEGG_PRION_DISEASES	0.217086	0.634225	387	35	1	NCAM2
POLYSACCHARIDE_BINDING	POLYSACCHARIDE_BINDING	0.217086	0.634225	387	35	1	FSTL1
POSITIVE_REGULATION_OF_SIGNAL_TRANSDUCTION	POSITIVE_REGULATION_OF_SIGNAL_TRANSDUCTION	0.216603	0.634225	387	125	2	LYN	WLS
REGULATION_OF_CELL_ADHESION	REGULATION_OF_CELL_ADHESION	0.217086	0.634225	387	35	1	TGFBI
REGULATION_OF_LYMPHOCYTE_ACTIVATION	REGULATION_OF_LYMPHOCYTE_ACTIVATION	0.217086	0.634225	387	35	1	SPINK5
BASEMENT_MEMBRANE	BASEMENT_MEMBRANE	0.222543	0.643755	387	36	1	AGRN
EXCRETION	EXCRETION	0.222543	0.643755	387	36	1	AQP3
KEGG_SPHINGOLIPID_METABOLISM	KEGG_SPHINGOLIPID_METABOLISM	0.222543	0.643755	387	36	1	SPHK1
NEGATIVE_REGULATION_OF_TRANSCRIPTION_DNA_DEPENDENT	NEGATIVE_REGULATION_OF_TRANSCRIPTION_DNA_DEPENDENT	0.221709	0.643755	387	127	2	NR6A1	TBX2
OXIDOREDUCTASE_ACTIVITY_GO_0016705	OXIDOREDUCTASE_ACTIVITY_GO_0016705	0.222543	0.643755	387	36	1	PLOD2
REACTOME_FRS2_MEDIATED_CASCADE	REACTOME_FRS2_MEDIATED_CASCADE	0.222543	0.643755	387	36	1	FGFR3
REACTOME_GAB1_SIGNALOSOME	REACTOME_GAB1_SIGNALOSOME	0.222543	0.643755	387	36	1	EGFR
REACTOME_IRON_UPTAKE_AND_TRANSPORT	REACTOME_IRON_UPTAKE_AND_TRANSPORT	0.222543	0.643755	387	36	1	ABCG2
ION_HOMEOSTASIS	ION_HOMEOSTASIS	0.224265	0.647939	387	128	2	IFI6	RHCG
BIOCARTA_PAR1_PATHWAY	BIOCARTA_PAR1_PATHWAY	0.227962	0.652193	387	37	1	ARHGEF4
CLATHRIN_COATED_VESICLE	CLATHRIN_COATED_VESICLE	0.227962	0.652193	387	37	1	EGFR
CYSTEINE_TYPE_ENDOPEPTIDASE_ACTIVITY	CYSTEINE_TYPE_ENDOPEPTIDASE_ACTIVITY	0.227962	0.652193	387	37	1	USP2
ENERGY_DERIVATION_BY_OXIDATION_OF_ORGANIC_COMPOUNDS	ENERGY_DERIVATION_BY_OXIDATION_OF_ORGANIC_COMPOUNDS	0.227962	0.652193	387	37	1	GFPT2
LEUKOCYTE_DIFFERENTIATION	LEUKOCYTE_DIFFERENTIATION	0.227962	0.652193	387	37	1	SPINK5
NEGATIVE_REGULATION_OF_RNA_METABOLIC_PROCESS	NEGATIVE_REGULATION_OF_RNA_METABOLIC_PROCESS	0.226824	0.652193	387	129	2	NR6A1	TBX2
NEGATIVE_REGULATION_OF_SIGNAL_TRANSDUCTION	NEGATIVE_REGULATION_OF_SIGNAL_TRANSDUCTION	0.227962	0.652193	387	37	1	TAX1BP3
REACTOME_NEGATIVE_REGULATION_OF_FGFR_SIGNALING	REACTOME_NEGATIVE_REGULATION_OF_FGFR_SIGNALING	0.227962	0.652193	387	37	1	FGFR3
ACTIVATION_OF_MAPK_ACTIVITY	ACTIVATION_OF_MAPK_ACTIVITY	0.233343	0.665156	387	38	1	MAP3K11
BIOCARTA_INTEGRIN_PATHWAY	BIOCARTA_INTEGRIN_PATHWAY	0.233343	0.665156	387	38	1	CAV1
REACTOME_PRE_NOTCH_EXPRESSION_AND_PROCESSING	REACTOME_PRE_NOTCH_EXPRESSION_AND_PROCESSING	0.233343	0.665156	387	38	1	TP53
HYDROLASE_ACTIVITY_ACTING_ON_ACID_ANHYDRIDESCATALYZING_TRANSMEMBRANE_MOVEMENT_OF_SUBSTANCES	HYDROLASE_ACTIVITY_ACTING_ON_ACID_ANHYDRIDESCATALYZING_TRANSMEMBRANE_MOVEMENT_OF_SUBSTANCES	0.238687	0.675465	387	39	1	ABCG2
KEGG_LYSINE_DEGRADATION	KEGG_LYSINE_DEGRADATION	0.238687	0.675465	387	39	1	PLOD2
KEGG_PYRUVATE_METABOLISM	KEGG_PYRUVATE_METABOLISM	0.238687	0.675465	387	39	1	LDHD
REGULATION_OF_ORGANELLE_ORGANIZATION_AND_BIOGENESIS	REGULATION_OF_ORGANELLE_ORGANIZATION_AND_BIOGENESIS	0.238687	0.675465	387	39	1	GSN
SPINDLE	SPINDLE	0.238687	0.675465	387	39	1	LATS2
TRANSLATION_REGULATOR_ACTIVITY	TRANSLATION_REGULATOR_ACTIVITY	0.238687	0.675465	387	39	1	SAMD4A
RHODOPSIN_LIKE_RECEPTOR_ACTIVITY	RHODOPSIN_LIKE_RECEPTOR_ACTIVITY	0.239646	0.676546	387	134	2	GRPR	PTGER3
SEXUAL_REPRODUCTION	SEXUAL_REPRODUCTION	0.239646	0.676546	387	134	2	NR6A1	RPL39L
REACTOME_NEUROTRANSMITTER_RECEPTOR_BINDING_AND_DOWNSTREAM_TRANSMISSION_IN_THE_POSTSYNAPTIC_CELL	REACTOME_NEUROTRANSMITTER_RECEPTOR_BINDING_AND_DOWNSTREAM_TRANSMISSION_IN_THE_POSTSYNAPTIC_CELL	0.242215	0.682977	387	135	2	AP2M1	PLCB3
ATPASE_ACTIVITY_COUPLED_TO_MOVEMENT_OF_SUBSTANCES	ATPASE_ACTIVITY_COUPLED_TO_MOVEMENT_OF_SUBSTANCES	0.243994	0.685522	387	40	1	ABCG2
PHOSPHORIC_DIESTER_HYDROLASE_ACTIVITY	PHOSPHORIC_DIESTER_HYDROLASE_ACTIVITY	0.243994	0.685522	387	40	1	PLD1
PRIMARY_ACTIVE_TRANSMEMBRANE_TRANSPORTER_ACTIVITY	PRIMARY_ACTIVE_TRANSMEMBRANE_TRANSPORTER_ACTIVITY	0.243994	0.685522	387	40	1	ABCG2
AMINE_TRANSMEMBRANE_TRANSPORTER_ACTIVITY	AMINE_TRANSMEMBRANE_TRANSPORTER_ACTIVITY	0.249264	0.696159	387	41	1	SLC6A14
MICROSOME	MICROSOME	0.249264	0.696159	387	41	1	OAS3
REACTOME_IL_2_SIGNALING	REACTOME_IL_2_SIGNALING	0.249264	0.696159	387	41	1	STAT5A
REACTOME_PLC_BETA_MEDIATED_EVENTS	REACTOME_PLC_BETA_MEDIATED_EVENTS	0.249264	0.696159	387	41	1	PLCB3
SERINE_TYPE_ENDOPEPTIDASE_ACTIVITY	SERINE_TYPE_ENDOPEPTIDASE_ACTIVITY	0.249264	0.696159	387	41	1	HTRA1
KEGG_ALDOSTERONE_REGULATED_SODIUM_REABSORPTION	KEGG_ALDOSTERONE_REGULATED_SODIUM_REABSORPTION	0.254498	0.708246	387	42	1	SFN
PHOSPHOLIPASE_ACTIVITY	PHOSPHOLIPASE_ACTIVITY	0.254498	0.708246	387	42	1	PLD1
REACTOME_PI3K_EVENTS_IN_ERBB2_SIGNALING	REACTOME_PI3K_EVENTS_IN_ERBB2_SIGNALING	0.254498	0.708246	387	42	1	EGFR
BIOCARTA_BIOPEPTIDES_PATHWAY	BIOCARTA_BIOPEPTIDES_PATHWAY	0.259695	0.719296	387	43	1	STAT5A
REACTOME_REGULATION_OF_WATER_BALANCE_BY_RENAL_AQUAPORINS	REACTOME_REGULATION_OF_WATER_BALANCE_BY_RENAL_AQUAPORINS	0.259695	0.719296	387	43	1	AQP3
SH3_SH2_ADAPTOR_ACTIVITY	SH3_SH2_ADAPTOR_ACTIVITY	0.259695	0.719296	387	43	1	GRB14
VESICULAR_FRACTION	VESICULAR_FRACTION	0.259695	0.719296	387	43	1	OAS3
CELLULAR_HOMEOSTASIS	CELLULAR_HOMEOSTASIS	0.260224	0.719913	387	142	2	IFI6	RHCG
CARBOXYLIC_ACID_TRANSMEMBRANE_TRANSPORTER_ACTIVITY	CARBOXYLIC_ACID_TRANSMEMBRANE_TRANSPORTER_ACTIVITY	0.264855	0.72503	387	44	1	SLC6A14
G_PROTEIN_SIGNALING_COUPLED_TO_IP3_SECOND_MESSENGERPHOSPHOLIPASE_C_ACTIVATING	G_PROTEIN_SIGNALING_COUPLED_TO_IP3_SECOND_MESSENGERPHOSPHOLIPASE_C_ACTIVATING	0.264855	0.72503	387	44	1	EGFR
GOLGI_MEMBRANE	GOLGI_MEMBRANE	0.264855	0.72503	387	44	1	CAV1
JNK_CASCADE	JNK_CASCADE	0.264855	0.72503	387	44	1	MAP3K11
KEGG_ABC_TRANSPORTERS	KEGG_ABC_TRANSPORTERS	0.264855	0.72503	387	44	1	ABCG2
KEGG_AMINO_SUGAR_AND_NUCLEOTIDE_SUGAR_METABOLISM	KEGG_AMINO_SUGAR_AND_NUCLEOTIDE_SUGAR_METABOLISM	0.264855	0.72503	387	44	1	GFPT2
KEGG_VASOPRESSIN_REGULATED_WATER_REABSORPTION	KEGG_VASOPRESSIN_REGULATED_WATER_REABSORPTION	0.264855	0.72503	387	44	1	AQP3
PATTERN_BINDING	PATTERN_BINDING	0.264855	0.72503	387	44	1	FSTL1
T_CELL_ACTIVATION	T_CELL_ACTIVATION	0.264855	0.72503	387	44	1	SPINK5
BIOCARTA_TCR_PATHWAY	BIOCARTA_TCR_PATHWAY	0.26998	0.734772	387	45	1	NFATC2
COATED_VESICLE	COATED_VESICLE	0.26998	0.734772	387	45	1	EGFR
ORGANIC_ACID_TRANSMEMBRANE_TRANSPORTER_ACTIVITY	ORGANIC_ACID_TRANSMEMBRANE_TRANSPORTER_ACTIVITY	0.26998	0.734772	387	45	1	SLC6A14
REACTOME_MITOCHONDRIAL_PROTEIN_IMPORT	REACTOME_MITOCHONDRIAL_PROTEIN_IMPORT	0.26998	0.734772	387	45	1	LDHD
SERINE_TYPE_PEPTIDASE_ACTIVITY	SERINE_TYPE_PEPTIDASE_ACTIVITY	0.26998	0.734772	387	45	1	HTRA1
GTP_BINDING	GTP_BINDING	0.27507	0.745165	387	46	1	MX1
RESPONSE_TO_VIRUS	RESPONSE_TO_VIRUS	0.27507	0.745165	387	46	1	IFI44
SERINE_HYDROLASE_ACTIVITY	SERINE_HYDROLASE_ACTIVITY	0.27507	0.745165	387	46	1	HTRA1
STRESS_ACTIVATED_PROTEIN_KINASE_SIGNALING_PATHWAY	STRESS_ACTIVATED_PROTEIN_KINASE_SIGNALING_PATHWAY	0.27507	0.745165	387	46	1	MAP3K11
PHOSPHORIC_ESTER_HYDROLASE_ACTIVITY	PHOSPHORIC_ESTER_HYDROLASE_ACTIVITY	0.275672	0.745936	387	148	2	PLD1	TPTE
GUANYL_NUCLEOTIDE_BINDING	GUANYL_NUCLEOTIDE_BINDING	0.280124	0.751051	387	47	1	MX1
HYDROLASE_ACTIVITY_ACTING_ON_GLYCOSYL_BONDS	HYDROLASE_ACTIVITY_ACTING_ON_GLYCOSYL_BONDS	0.280124	0.751051	387	47	1	ADPRH
KEGG_NOTCH_SIGNALING_PATHWAY	KEGG_NOTCH_SIGNALING_PATHWAY	0.280124	0.751051	387	47	1	DTX1
MICROTUBULE_ASSOCIATED_COMPLEX	MICROTUBULE_ASSOCIATED_COMPLEX	0.280124	0.751051	387	47	1	KIFC3
NEGATIVE_REGULATION_OF_CELL_PROLIFERATION	NEGATIVE_REGULATION_OF_CELL_PROLIFERATION	0.278246	0.751051	387	149	2	CGREF1	SCIN
PHOSPHOINOSITIDE_MEDIATED_SIGNALING	PHOSPHOINOSITIDE_MEDIATED_SIGNALING	0.280124	0.751051	387	47	1	EGFR
PROTEIN_IMPORT_INTO_NUCLEUS	PROTEIN_IMPORT_INTO_NUCLEUS	0.280124	0.751051	387	47	1	CDH1
UBIQUITIN_CYCLE	UBIQUITIN_CYCLE	0.280124	0.751051	387	47	1	ISG15
KEGG_JAK_STAT_SIGNALING_PATHWAY	KEGG_JAK_STAT_SIGNALING_PATHWAY	0.283391	0.758944	387	151	2	LIF	STAT5A
CYTOKINE_BINDING	CYTOKINE_BINDING	0.285142	0.761028	387	48	1	CRLF1
PROTEIN_PROCESSING	PROTEIN_PROCESSING	0.285142	0.761028	387	48	1	MAP3K11
REACTOME_AUTODEGRADATION_OF_THE_E3_UBIQUITIN_LIGASE_COP1	REACTOME_AUTODEGRADATION_OF_THE_E3_UBIQUITIN_LIGASE_COP1	0.285142	0.761028	387	48	1	TP53
METALLOPEPTIDASE_ACTIVITY	METALLOPEPTIDASE_ACTIVITY	0.290126	0.770822	387	49	1	ENPEP
MOLECULAR_ADAPTOR_ACTIVITY	MOLECULAR_ADAPTOR_ACTIVITY	0.290126	0.770822	387	49	1	GRB14
NUCLEAR_IMPORT	NUCLEAR_IMPORT	0.290126	0.770822	387	49	1	CDH1
REACTOME_AMINO_ACID_AND_OLIGOPEPTIDE_SLC_TRANSPORTERS	REACTOME_AMINO_ACID_AND_OLIGOPEPTIDE_SLC_TRANSPORTERS	0.290126	0.770822	387	49	1	SLC6A14
CYSTEINE_TYPE_PEPTIDASE_ACTIVITY	CYSTEINE_TYPE_PEPTIDASE_ACTIVITY	0.295075	0.780436	387	50	1	USP2
LIPASE_ACTIVITY	LIPASE_ACTIVITY	0.295075	0.780436	387	50	1	PLD1
REACTOME_AQUAPORIN_MEDIATED_TRANSPORT	REACTOME_AQUAPORIN_MEDIATED_TRANSPORT	0.295075	0.780436	387	50	1	AQP3
REACTOME_CYTOCHROME_P450_ARRANGED_BY_SUBSTRATE_TYPE	REACTOME_CYTOCHROME_P450_ARRANGED_BY_SUBSTRATE_TYPE	0.295075	0.780436	387	50	1	CYP27B1
HELICASE_ACTIVITY	HELICASE_ACTIVITY	0.29999	0.788104	387	51	1	SMARCA1
REACTOME_CIRCADIAN_CLOCK	REACTOME_CIRCADIAN_CLOCK	0.29999	0.788104	387	51	1	ELOVL3
REACTOME_O_LINKED_GLYCOSYLATION_OF_MUCINS	REACTOME_O_LINKED_GLYCOSYLATION_OF_MUCINS	0.29999	0.788104	387	51	1	GALNT12
RESPONSE_TO_DNA_DAMAGE_STIMULUS	RESPONSE_TO_DNA_DAMAGE_STIMULUS	0.298803	0.788104	387	157	2	SFN	TP53
SOLUBLE_FRACTION	SOLUBLE_FRACTION	0.298803	0.788104	387	157	2	FAS	SPHK1
STRUCTURE_SPECIFIC_DNA_BINDING	STRUCTURE_SPECIFIC_DNA_BINDING	0.29999	0.788104	387	51	1	TP53
KEGG_AMYOTROPHIC_LATERAL_SCLEROSIS_ALS	KEGG_AMYOTROPHIC_LATERAL_SCLEROSIS_ALS	0.304871	0.797354	387	52	1	TP53
PROTEIN_TYROSINE_PHOSPHATASE_ACTIVITY	PROTEIN_TYROSINE_PHOSPHATASE_ACTIVITY	0.304871	0.797354	387	52	1	TPTE
REACTOME_HEPARAN_SULFATE_HEPARIN_HS_GAG_METABOLISM	REACTOME_HEPARAN_SULFATE_HEPARIN_HS_GAG_METABOLISM	0.304871	0.797354	387	52	1	AGRN
REACTOME_PHOSPHOLIPASE_C_MEDIATED_CASCADE	REACTOME_PHOSPHOLIPASE_C_MEDIATED_CASCADE	0.304871	0.797354	387	52	1	FGFR3
MULTI_ORGANISM_PROCESS	MULTI_ORGANISM_PROCESS	0.30649	0.800696	387	160	2	IFI44	PSG9
FEMALE_PREGNANCY	FEMALE_PREGNANCY	0.309718	0.80554	387	53	1	PSG9
PEPTIDE_RECEPTOR_ACTIVITY	PEPTIDE_RECEPTOR_ACTIVITY	0.309718	0.80554	387	53	1	GRPR
PROTEIN_COMPLEX_BINDING	PROTEIN_COMPLEX_BINDING	0.309718	0.80554	387	53	1	TGFBI
RECEPTOR_COMPLEX	RECEPTOR_COMPLEX	0.309718	0.80554	387	53	1	ITGB4
G_PROTEIN_COUPLED_RECEPTOR_ACTIVITY	G_PROTEIN_COUPLED_RECEPTOR_ACTIVITY	0.314161	0.813549	387	163	2	GRPR	PTGER3
NUCLEASE_ACTIVITY	NUCLEASE_ACTIVITY	0.31453	0.813549	387	54	1	TP53
REACTOME_ION_CHANNEL_TRANSPORT	REACTOME_ION_CHANNEL_TRANSPORT	0.31453	0.813549	387	54	1	ATP10A
REACTOME_P53_DEPENDENT_G1_DNA_DAMAGE_RESPONSE	REACTOME_P53_DEPENDENT_G1_DNA_DAMAGE_RESPONSE	0.31453	0.813549	387	54	1	TP53
REACTOME_PI_3K_CASCADE	REACTOME_PI_3K_CASCADE	0.31453	0.813549	387	54	1	FGFR3
CELL_CYCLE_ARREST_GO_0007050	CELL_CYCLE_ARREST_GO_0007050	0.31931	0.823188	387	55	1	TP53
KEGG_STEROID_HORMONE_BIOSYNTHESIS	KEGG_STEROID_HORMONE_BIOSYNTHESIS	0.31931	0.823188	387	55	1	HSD17B12
PROTEIN_FOLDING	PROTEIN_FOLDING	0.31931	0.823188	387	55	1	PDIA2
CENTROSOME	CENTROSOME	0.324056	0.833592	387	56	1	MAP3K11
REGULATION_OF_RESPONSE_TO_STIMULUS	REGULATION_OF_RESPONSE_TO_STIMULUS	0.324056	0.833592	387	56	1	SPINK5
CELL_CYCLE_PHASE	CELL_CYCLE_PHASE	0.326902	0.839992	387	168	2	LATS2	MAP3K11
INORGANIC_CATION_TRANSMEMBRANE_TRANSPORTER_ACTIVITY	INORGANIC_CATION_TRANSMEMBRANE_TRANSPORTER_ACTIVITY	0.328769	0.842943	387	57	1	RHCG
OXIDOREDUCTASE_ACTIVITY_GO_0016616	OXIDOREDUCTASE_ACTIVITY_GO_0016616	0.328769	0.842943	387	57	1	CBR1
KEGG_ARACHIDONIC_ACID_METABOLISM	KEGG_ARACHIDONIC_ACID_METABOLISM	0.33345	0.854011	387	58	1	CBR1
GTPASE_ACTIVATOR_ACTIVITY	GTPASE_ACTIVATOR_ACTIVITY	0.338098	0.86497	387	59	1	RASAL1
LYSOSOME	LYSOSOME	0.342713	0.873919	387	60	1	LAMP3
LYTIC_VACUOLE	LYTIC_VACUOLE	0.342713	0.873919	387	60	1	LAMP3
MAGNESIUM_ION_BINDING	MAGNESIUM_ION_BINDING	0.342713	0.873919	387	60	1	SPHK1
ENZYME_BINDING	ENZYME_BINDING	0.344631	0.877855	387	175	2	COTL1	TP53
LYMPHOCYTE_ACTIVATION	LYMPHOCYTE_ACTIVATION	0.347297	0.88082	387	61	1	SPINK5
PROTEIN_AMINO_ACID_DEPHOSPHORYLATION	PROTEIN_AMINO_ACID_DEPHOSPHORYLATION	0.347297	0.88082	387	61	1	TPTE
PROTEIN_IMPORT	PROTEIN_IMPORT	0.347297	0.88082	387	61	1	CDH1
TRANSLATION	TRANSLATION	0.347152	0.88082	387	176	2	IGF2BP2	SAMD4A
OXIDOREDUCTASE_ACTIVITY_ACTING_ON_CH_OH_GROUP_OF_DONORS	OXIDOREDUCTASE_ACTIVITY_ACTING_ON_CH_OH_GROUP_OF_DONORS	0.356369	0.902852	387	63	1	CBR1
G_PROTEIN_SIGNALING_COUPLED_TO_CAMP_NUCLEOTIDE_SECOND_MESSENGER	G_PROTEIN_SIGNALING_COUPLED_TO_CAMP_NUCLEOTIDE_SECOND_MESSENGER	0.360857	0.912253	387	64	1	CALCR
REACTOME_SPHINGOLIPID_METABOLISM	REACTOME_SPHINGOLIPID_METABOLISM	0.360857	0.912253	387	64	1	SPHK1
CAMP_MEDIATED_SIGNALING	CAMP_MEDIATED_SIGNALING	0.365314	0.917588	387	65	1	CALCR
MICROTUBULE_ORGANIZING_CENTER	MICROTUBULE_ORGANIZING_CENTER	0.365314	0.917588	387	65	1	MAP3K11
POSITIVE_REGULATION_OF_MULTICELLULAR_ORGANISMAL_PROCESS	POSITIVE_REGULATION_OF_MULTICELLULAR_ORGANISMAL_PROCESS	0.365314	0.917588	387	65	1	SPHK1
POSITIVE_REGULATION_OF_TRANSCRIPTION_FROM_RNA_POLYMERASE_II_PROMOTER	POSITIVE_REGULATION_OF_TRANSCRIPTION_FROM_RNA_POLYMERASE_II_PROMOTER	0.365314	0.917588	387	65	1	TP53
REACTOME_GLUCOSE_METABOLISM	REACTOME_GLUCOSE_METABOLISM	0.365314	0.917588	387	65	1	PFKP
REGULATION_OF_IMMUNE_SYSTEM_PROCESS	REGULATION_OF_IMMUNE_SYSTEM_PROCESS	0.365314	0.917588	387	65	1	SPINK5
REACTOME_TRANSMISSION_ACROSS_CHEMICAL_SYNAPSES	REACTOME_TRANSMISSION_ACROSS_CHEMICAL_SYNAPSES	0.367196	0.921328	387	184	2	AP2M1	PLCB3
ENDOSOME	ENDOSOME	0.369741	0.926722	387	66	1	EGFR
DEPHOSPHORYLATION	DEPHOSPHORYLATION	0.374136	0.933748	387	67	1	TPTE
KEGG_ADIPOCYTOKINE_SIGNALING_PATHWAY	KEGG_ADIPOCYTOKINE_SIGNALING_PATHWAY	0.374136	0.933748	387	67	1	CD36
REGULATION_OF_TRANSPORT	REGULATION_OF_TRANSPORT	0.374136	0.933748	387	67	1	CDH1
SMALL_GTPASE_REGULATOR_ACTIVITY	SMALL_GTPASE_REGULATOR_ACTIVITY	0.374136	0.933748	387	67	1	RASAL1
ESTABLISHMENT_OF_PROTEIN_LOCALIZATION	ESTABLISHMENT_OF_PROTEIN_LOCALIZATION	0.374652	0.934041	387	187	2	CDH1	EGFR
LEUKOCYTE_ACTIVATION	LEUKOCYTE_ACTIVATION	0.378501	0.939644	387	68	1	SPINK5
REACTOME_PI3K_CASCADE	REACTOME_PI3K_CASCADE	0.378501	0.939644	387	68	1	FGFR3
REACTOME_SIGNALING_BY_NOTCH1	REACTOME_SIGNALING_BY_NOTCH1	0.378501	0.939644	387	68	1	DTX1
VACUOLE	VACUOLE	0.378501	0.939644	387	68	1	LAMP3
REACTOME_PHOSPHOLIPID_METABOLISM	REACTOME_PHOSPHOLIPID_METABOLISM	0.379602	0.941381	387	189	2	PLD1	SPHK1
KEGG_LONG_TERM_POTENTIATION	KEGG_LONG_TERM_POTENTIATION	0.382836	0.946399	387	69	1	PLCB3
KEGG_METABOLISM_OF_XENOBIOTICS_BY_CYTOCHROME_P450	KEGG_METABOLISM_OF_XENOBIOTICS_BY_CYTOCHROME_P450	0.382836	0.946399	387	69	1	ALDH1A3
REACTOME_PHASE1_FUNCTIONALIZATION_OF_COMPOUNDS	REACTOME_PHASE1_FUNCTIONALIZATION_OF_COMPOUNDS	0.382836	0.946399	387	69	1	CYP27B1
CELL_CYCLE_PROCESS	CELL_CYCLE_PROCESS	0.384536	0.948603	387	191	2	LATS2	MAP3K11
REACTOME_METABOLISM_OF_AMINO_ACIDS_AND_DERIVATIVES	REACTOME_METABOLISM_OF_AMINO_ACIDS_AND_DERIVATIVES	0.384536	0.948603	387	191	2	CBS	PSAT1
CARBOHYDRATE_BINDING	CARBOHYDRATE_BINDING	0.38714	0.953022	387	70	1	FSTL1
REACTOME_METABOLISM_OF_NUCLEOTIDES	REACTOME_METABOLISM_OF_NUCLEOTIDES	0.38714	0.953022	387	70	1	APRT
KEGG_DRUG_METABOLISM_CYTOCHROME_P450	KEGG_DRUG_METABOLISM_CYTOCHROME_P450	0.391414	0.961527	387	71	1	ALDH1A3
KEGG_GLYCEROPHOSPHOLIPID_METABOLISM	KEGG_GLYCEROPHOSPHOLIPID_METABOLISM	0.391414	0.961527	387	71	1	PLD1
VESICLE_MEDIATED_TRANSPORT	VESICLE_MEDIATED_TRANSPORT	0.391905	0.961725	387	194	2	FOLR1	SCIN
NUCLEAR_ENVELOPE	NUCLEAR_ENVELOPE	0.395659	0.968911	387	72	1	PTGER3
PROTEIN_DOMAIN_SPECIFIC_BINDING	PROTEIN_DOMAIN_SPECIFIC_BINDING	0.395659	0.968911	387	72	1	ARHGEF4
REACTOME_ANTIGEN_PROCESSING_UBIQUITINATION_PROTEASOME_DEGRADATION	REACTOME_ANTIGEN_PROCESSING_UBIQUITINATION_PROTEASOME_DEGRADATION	0.399234	0.976646	387	197	2	FBXO27	UBE2E3
GLYCOPROTEIN_BIOSYNTHETIC_PROCESS	GLYCOPROTEIN_BIOSYNTHETIC_PROCESS	0.399874	0.977193	387	73	1	CD37
REACTOME_G_ALPHA1213_SIGNALLING_EVENTS	REACTOME_G_ALPHA1213_SIGNALLING_EVENTS	0.40406	0.986395	387	74	1	ARHGEF4
CELL_ACTIVATION	CELL_ACTIVATION	0.408217	0.995506	387	75	1	SPINK5
3_5_CYCLIC_NUCLEOTIDE_PHOSPHODIESTERASE_ACTIVITY	3_5_CYCLIC_NUCLEOTIDE_PHOSPHODIESTERASE_ACTIVITY	1	1	387	13	0
3_5_EXONUCLEASE_ACTIVITY	3_5_EXONUCLEASE_ACTIVITY	1	1	387	12	0
ACETYLCHOLINE_BINDING	ACETYLCHOLINE_BINDING	1	1	387	17	0
ACETYLGALACTOSAMINYLTRANSFERASE_ACTIVITY	ACETYLGALACTOSAMINYLTRANSFERASE_ACTIVITY	1	1	387	12	0
ACETYLGLUCOSAMINYLTRANSFERASE_ACTIVITY	ACETYLGLUCOSAMINYLTRANSFERASE_ACTIVITY	1	1	387	15	0
ACETYLTRANSFERASE_ACTIVITY	ACETYLTRANSFERASE_ACTIVITY	1	1	387	25	0
ACID_AMINO_ACID_LIGASE_ACTIVITY	ACID_AMINO_ACID_LIGASE_ACTIVITY	1	1	387	56	0
ACTIN_FILAMENT	ACTIN_FILAMENT	1	1	387	18	0
ACTIN_FILAMENT_BASED_MOVEMENT	ACTIN_FILAMENT_BASED_MOVEMENT	1	1	387	10	0
ACTIN_FILAMENT_BUNDLE_FORMATION	ACTIN_FILAMENT_BUNDLE_FORMATION	1	1	387	12	0
ACTIN_FILAMENT_ORGANIZATION	ACTIN_FILAMENT_ORGANIZATION	1	1	387	23	0
ACTIVATION_OF_IMMUNE_RESPONSE	ACTIVATION_OF_IMMUNE_RESPONSE	1	1	387	17	0
ACTIVATION_OF_NF_KAPPAB_TRANSCRIPTION_FACTOR	ACTIVATION_OF_NF_KAPPAB_TRANSCRIPTION_FACTOR	1	1	387	18	0
ACTIVATION_OF_PROTEIN_KINASE_ACTIVITY	ACTIVATION_OF_PROTEIN_KINASE_ACTIVITY	1	1	387	26	0
ACUTE_INFLAMMATORY_RESPONSE	ACUTE_INFLAMMATORY_RESPONSE	1	1	387	11	0
ADAPTIVE_IMMUNE_RESPONSE	ADAPTIVE_IMMUNE_RESPONSE	1	1	387	25	0
ADAPTIVE_IMMUNE_RESPONSE_GO_0002460	ADAPTIVE_IMMUNE_RESPONSE_GO_0002460	1	1	387	24	0
ADENYLATE_CYCLASE_ACTIVATION	ADENYLATE_CYCLASE_ACTIVATION	1	1	387	19	0
ADP_BINDING	ADP_BINDING	1	1	387	11	0
AEROBIC_RESPIRATION	AEROBIC_RESPIRATION	1	1	387	15	0
ALDO_KETO_REDUCTASE_ACTIVITY	ALDO_KETO_REDUCTASE_ACTIVITY	1	1	387	11	0
AMINE_BINDING	AMINE_BINDING	1	1	387	23	0
AMINE_BIOSYNTHETIC_PROCESS	AMINE_BIOSYNTHETIC_PROCESS	1	1	387	15	0
AMINE_CATABOLIC_PROCESS	AMINE_CATABOLIC_PROCESS	1	1	387	27	0
AMINE_RECEPTOR_ACTIVITY	AMINE_RECEPTOR_ACTIVITY	1	1	387	34	0
AMINE_TRANSPORT	AMINE_TRANSPORT	1	1	387	38	0
AMINO_ACID_AND_DERIVATIVE_METABOLIC_PROCESS	AMINO_ACID_AND_DERIVATIVE_METABOLIC_PROCESS	0.503238	1	387	100	1	SLC6A14
AMINO_ACID_CATABOLIC_PROCESS	AMINO_ACID_CATABOLIC_PROCESS	1	1	387	25	0
AMINO_ACID_DERIVATIVE_BIOSYNTHETIC_PROCESS	AMINO_ACID_DERIVATIVE_BIOSYNTHETIC_PROCESS	1	1	387	10	0
AMINO_ACID_DERIVATIVE_METABOLIC_PROCESS	AMINO_ACID_DERIVATIVE_METABOLIC_PROCESS	1	1	387	23	0
AMINO_ACID_METABOLIC_PROCESS	AMINO_ACID_METABOLIC_PROCESS	0.420514	1	387	78	1	SLC6A14
AMINO_ACID_TRANSPORT	AMINO_ACID_TRANSPORT	1	1	387	26	0
AMINO_SUGAR_METABOLIC_PROCESS	AMINO_SUGAR_METABOLIC_PROCESS	1	1	387	18	0
AMYLOID_PRECURSOR_PROTEIN_METABOLIC_PROCESS	AMYLOID_PRECURSOR_PROTEIN_METABOLIC_PROCESS	1	1	387	10	0
ANCHORED_TO_MEMBRANE	ANCHORED_TO_MEMBRANE	1	1	387	13	0
ANCHORED_TO_PLASMA_MEMBRANE	ANCHORED_TO_PLASMA_MEMBRANE	1	1	387	13	0
ANDROGEN_RECEPTOR_SIGNALING_PATHWAY	ANDROGEN_RECEPTOR_SIGNALING_PATHWAY	1	1	387	12	0
ANION_CATION_SYMPORTER_ACTIVITY	ANION_CATION_SYMPORTER_ACTIVITY	1	1	387	16	0
ANION_CHANNEL_ACTIVITY	ANION_CHANNEL_ACTIVITY	1	1	387	20	0
ANION_TRANSMEMBRANE_TRANSPORTER_ACTIVITY	ANION_TRANSMEMBRANE_TRANSPORTER_ACTIVITY	1	1	387	59	0
ANTIGEN_BINDING	ANTIGEN_BINDING	1	1	387	27	0
ANTIOXIDANT_ACTIVITY	ANTIOXIDANT_ACTIVITY	1	1	387	17	0
ANTIPORTER_ACTIVITY	ANTIPORTER_ACTIVITY	1	1	387	10	0
APOPTOTIC_NUCLEAR_CHANGES	APOPTOTIC_NUCLEAR_CHANGES	1	1	387	19	0
AROMATIC_COMPOUND_METABOLIC_PROCESS	AROMATIC_COMPOUND_METABOLIC_PROCESS	1	1	387	27	0
ATP_DEPENDENT_DNA_HELICASE_ACTIVITY	ATP_DEPENDENT_DNA_HELICASE_ACTIVITY	1	1	387	11	0
ATP_DEPENDENT_HELICASE_ACTIVITY	ATP_DEPENDENT_HELICASE_ACTIVITY	1	1	387	27	0
ATP_DEPENDENT_RNA_HELICASE_ACTIVITY	ATP_DEPENDENT_RNA_HELICASE_ACTIVITY	1	1	387	17	0
ATPASE_ACTIVITY_COUPLED_TO_TRANSMEMBRANE_MOVEMENT_OF_IONS	ATPASE_ACTIVITY_COUPLED_TO_TRANSMEMBRANE_MOVEMENT_OF_IONS	1	1	387	24	0
ATPASE_ACTIVITY_COUPLED_TO_TRANSMEMBRANE_MOVEMENT_OF_IONS_PHOSPHORYLATIVE_MECHANISM	ATPASE_ACTIVITY_COUPLED_TO_TRANSMEMBRANE_MOVEMENT_OF_IONS_PHOSPHORYLATIVE_MECHANISM	1	1	387	20	0
AUXILIARY_TRANSPORT_PROTEIN_ACTIVITY	AUXILIARY_TRANSPORT_PROTEIN_ACTIVITY	1	1	387	25	0
AXON	AXON	1	1	387	12	0
B_CELL_ACTIVATION	B_CELL_ACTIVATION	1	1	387	20	0
B_CELL_DIFFERENTIATION	B_CELL_DIFFERENTIATION	1	1	387	12	0
BETA_TUBULIN_BINDING	BETA_TUBULIN_BINDING	1	1	387	10	0
BILE_ACID_METABOLIC_PROCESS	BILE_ACID_METABOLIC_PROCESS	1	1	387	11	0
BIOCARTA_41BB_PATHWAY	BIOCARTA_41BB_PATHWAY	1	1	387	17	0
BIOCARTA_ACE2_PATHWAY	BIOCARTA_ACE2_PATHWAY	1	1	387	13	0
BIOCARTA_ACH_PATHWAY	BIOCARTA_ACH_PATHWAY	1	1	387	16	0
BIOCARTA_ACTINY_PATHWAY	BIOCARTA_ACTINY_PATHWAY	1	1	387	20	0
BIOCARTA_AGPCR_PATHWAY	BIOCARTA_AGPCR_PATHWAY	1	1	387	13	0
BIOCARTA_AHSP_PATHWAY	BIOCARTA_AHSP_PATHWAY	1	1	387	13	0
BIOCARTA_AKAP13_PATHWAY	BIOCARTA_AKAP13_PATHWAY	1	1	387	12	0
BIOCARTA_AKAP95_PATHWAY	BIOCARTA_AKAP95_PATHWAY	1	1	387	12	0
BIOCARTA_AKAPCENTROSOME_PATHWAY	BIOCARTA_AKAPCENTROSOME_PATHWAY	1	1	387	15	0
BIOCARTA_AKT_PATHWAY	BIOCARTA_AKT_PATHWAY	1	1	387	22	0
BIOCARTA_ALK_PATHWAY	BIOCARTA_ALK_PATHWAY	1	1	387	37	0
BIOCARTA_ARAP_PATHWAY	BIOCARTA_ARAP_PATHWAY	1	1	387	17	0
BIOCARTA_ARENRF2_PATHWAY	BIOCARTA_ARENRF2_PATHWAY	1	1	387	13	0
BIOCARTA_BARR_MAPK_PATHWAY	BIOCARTA_BARR_MAPK_PATHWAY	1	1	387	12	0
BIOCARTA_BARRESTIN_SRC_PATHWAY	BIOCARTA_BARRESTIN_SRC_PATHWAY	1	1	387	15	0
BIOCARTA_BCELLSURVIVAL_PATHWAY	BIOCARTA_BCELLSURVIVAL_PATHWAY	1	1	387	16	0
BIOCARTA_CACAM_PATHWAY	BIOCARTA_CACAM_PATHWAY	1	1	387	14	0
BIOCARTA_CARM1_PATHWAY	BIOCARTA_CARM1_PATHWAY	1	1	387	13	0
BIOCARTA_CASPASE_PATHWAY	BIOCARTA_CASPASE_PATHWAY	1	1	387	23	0
BIOCARTA_CCR3_PATHWAY	BIOCARTA_CCR3_PATHWAY	1	1	387	23	0
BIOCARTA_CCR5_PATHWAY	BIOCARTA_CCR5_PATHWAY	1	1	387	18	0
BIOCARTA_CD40_PATHWAY	BIOCARTA_CD40_PATHWAY	1	1	387	14	0
BIOCARTA_CDC42RAC_PATHWAY	BIOCARTA_CDC42RAC_PATHWAY	1	1	387	16	0
BIOCARTA_CDMAC_PATHWAY	BIOCARTA_CDMAC_PATHWAY	1	1	387	16	0
BIOCARTA_CELL2CELL_PATHWAY	BIOCARTA_CELL2CELL_PATHWAY	1	1	387	14	0
BIOCARTA_CELLCYCLE_PATHWAY	BIOCARTA_CELLCYCLE_PATHWAY	1	1	387	23	0
BIOCARTA_CERAMIDE_PATHWAY	BIOCARTA_CERAMIDE_PATHWAY	1	1	387	22	0
BIOCARTA_CFTR_PATHWAY	BIOCARTA_CFTR_PATHWAY	1	1	387	12	0
BIOCARTA_CHREBP2_PATHWAY	BIOCARTA_CHREBP2_PATHWAY	1	1	387	41	0
BIOCARTA_CK1_PATHWAY	BIOCARTA_CK1_PATHWAY	1	1	387	17	0
BIOCARTA_CREB_PATHWAY	BIOCARTA_CREB_PATHWAY	1	1	387	27	0
BIOCARTA_CXCR4_PATHWAY	BIOCARTA_CXCR4_PATHWAY	1	1	387	24	0
BIOCARTA_CYTOKINE_PATHWAY	BIOCARTA_CYTOKINE_PATHWAY	1	1	387	20	0
BIOCARTA_D4GDI_PATHWAY	BIOCARTA_D4GDI_PATHWAY	1	1	387	13	0
BIOCARTA_DC_PATHWAY	BIOCARTA_DC_PATHWAY	1	1	387	22	0
BIOCARTA_DEATH_PATHWAY	BIOCARTA_DEATH_PATHWAY	1	1	387	33	0
BIOCARTA_DNAFRAGMENT_PATHWAY	BIOCARTA_DNAFRAGMENT_PATHWAY	1	1	387	10	0
BIOCARTA_DREAM_PATHWAY	BIOCARTA_DREAM_PATHWAY	1	1	387	14	0
BIOCARTA_EIF2_PATHWAY	BIOCARTA_EIF2_PATHWAY	1	1	387	11	0
BIOCARTA_EIF4_PATHWAY	BIOCARTA_EIF4_PATHWAY	1	1	387	24	0
BIOCARTA_EIF_PATHWAY	BIOCARTA_EIF_PATHWAY	1	1	387	16	0
BIOCARTA_EPONFKB_PATHWAY	BIOCARTA_EPONFKB_PATHWAY	1	1	387	11	0
BIOCARTA_ERK5_PATHWAY	BIOCARTA_ERK5_PATHWAY	1	1	387	17	0
BIOCARTA_ERYTH_PATHWAY	BIOCARTA_ERYTH_PATHWAY	1	1	387	15	0
BIOCARTA_ETC_PATHWAY	BIOCARTA_ETC_PATHWAY	1	1	387	10	0
BIOCARTA_ETS_PATHWAY	BIOCARTA_ETS_PATHWAY	1	1	387	18	0
BIOCARTA_FEEDER_PATHWAY	BIOCARTA_FEEDER_PATHWAY	1	1	387	9	0
BIOCARTA_FIBRINOLYSIS_PATHWAY	BIOCARTA_FIBRINOLYSIS_PATHWAY	1	1	387	12	0
BIOCARTA_FREE_PATHWAY	BIOCARTA_FREE_PATHWAY	1	1	387	9	0
BIOCARTA_GABA_PATHWAY	BIOCARTA_GABA_PATHWAY	1	1	387	10	0
BIOCARTA_GCR_PATHWAY	BIOCARTA_GCR_PATHWAY	1	1	387	20	0
BIOCARTA_GLYCOLYSIS_PATHWAY	BIOCARTA_GLYCOLYSIS_PATHWAY	1	1	387	10	0
BIOCARTA_GSK3_PATHWAY	BIOCARTA_GSK3_PATHWAY	1	1	387	27	0
BIOCARTA_HCMV_PATHWAY	BIOCARTA_HCMV_PATHWAY	1	1	387	17	0
BIOCARTA_HIF_PATHWAY	BIOCARTA_HIF_PATHWAY	1	1	387	15	0
BIOCARTA_IGF1_PATHWAY	BIOCARTA_IGF1_PATHWAY	1	1	387	21	0
BIOCARTA_IGF1MTOR_PATHWAY	BIOCARTA_IGF1MTOR_PATHWAY	1	1	387	20	0
BIOCARTA_IGF1R_PATHWAY	BIOCARTA_IGF1R_PATHWAY	1	1	387	23	0
BIOCARTA_IL12_PATHWAY	BIOCARTA_IL12_PATHWAY	1	1	387	21	0
BIOCARTA_IL17_PATHWAY	BIOCARTA_IL17_PATHWAY	1	1	387	14	0
BIOCARTA_IL1R_PATHWAY	BIOCARTA_IL1R_PATHWAY	1	1	387	33	0
BIOCARTA_IL4_PATHWAY	BIOCARTA_IL4_PATHWAY	1	1	387	11	0
BIOCARTA_IL6_PATHWAY	BIOCARTA_IL6_PATHWAY	1	1	387	22	0
BIOCARTA_INSULIN_PATHWAY	BIOCARTA_INSULIN_PATHWAY	1	1	387	22	0
BIOCARTA_KREB_PATHWAY	BIOCARTA_KREB_PATHWAY	1	1	387	8	0
BIOCARTA_LEPTIN_PATHWAY	BIOCARTA_LEPTIN_PATHWAY	1	1	387	11	0
BIOCARTA_LONGEVITY_PATHWAY	BIOCARTA_LONGEVITY_PATHWAY	1	1	387	15	0
BIOCARTA_MAL_PATHWAY	BIOCARTA_MAL_PATHWAY	1	1	387	19	0
BIOCARTA_MAPK_PATHWAY	BIOCARTA_MAPK_PATHWAY	0.452076	1	387	86	1	MAP3K11
BIOCARTA_MCM_PATHWAY	BIOCARTA_MCM_PATHWAY	1	1	387	18	0
BIOCARTA_MET_PATHWAY	BIOCARTA_MET_PATHWAY	1	1	387	37	0
BIOCARTA_MITOCHONDRIA_PATHWAY	BIOCARTA_MITOCHONDRIA_PATHWAY	1	1	387	21	0
BIOCARTA_MTOR_PATHWAY	BIOCARTA_MTOR_PATHWAY	1	1	387	23	0
BIOCARTA_NEUROTRANSMITTERS_PATHWAY	BIOCARTA_NEUROTRANSMITTERS_PATHWAY	1	1	387	6	0
BIOCARTA_NFKB_PATHWAY	BIOCARTA_NFKB_PATHWAY	1	1	387	23	0
BIOCARTA_NKCELLS_PATHWAY	BIOCARTA_NKCELLS_PATHWAY	1	1	387	20	0
BIOCARTA_NKT_PATHWAY	BIOCARTA_NKT_PATHWAY	1	1	387	29	0
BIOCARTA_NO2IL12_PATHWAY	BIOCARTA_NO2IL12_PATHWAY	1	1	387	17	0
BIOCARTA_NOS1_PATHWAY	BIOCARTA_NOS1_PATHWAY	1	1	387	22	0
BIOCARTA_NTHI_PATHWAY	BIOCARTA_NTHI_PATHWAY	1	1	387	23	0
BIOCARTA_NUCLEARRS_PATHWAY	BIOCARTA_NUCLEARRS_PATHWAY	1	1	387	14	0
BIOCARTA_P27_PATHWAY	BIOCARTA_P27_PATHWAY	1	1	387	13	0
BIOCARTA_P35ALZHEIMERS_PATHWAY	BIOCARTA_P35ALZHEIMERS_PATHWAY	1	1	387	11	0
BIOCARTA_P38MAPK_PATHWAY	BIOCARTA_P38MAPK_PATHWAY	1	1	387	39	0
BIOCARTA_PARKIN_PATHWAY	BIOCARTA_PARKIN_PATHWAY	1	1	387	11	0
BIOCARTA_PGC1A_PATHWAY	BIOCARTA_PGC1A_PATHWAY	1	1	387	23	0
BIOCARTA_PITX2_PATHWAY	BIOCARTA_PITX2_PATHWAY	1	1	387	15	0
BIOCARTA_PLATELETAPP_PATHWAY	BIOCARTA_PLATELETAPP_PATHWAY	1	1	387	14	0
BIOCARTA_PLCE_PATHWAY	BIOCARTA_PLCE_PATHWAY	1	1	387	12	0
BIOCARTA_PROTEASOME_PATHWAY	BIOCARTA_PROTEASOME_PATHWAY	1	1	387	28	0
BIOCARTA_PS1_PATHWAY	BIOCARTA_PS1_PATHWAY	1	1	387	14	0
BIOCARTA_PTC1_PATHWAY	BIOCARTA_PTC1_PATHWAY	1	1	387	11	0
BIOCARTA_PTEN_PATHWAY	BIOCARTA_PTEN_PATHWAY	1	1	387	18	0
BIOCARTA_PYK2_PATHWAY	BIOCARTA_PYK2_PATHWAY	1	1	387	29	0
BIOCARTA_RAB_PATHWAY	BIOCARTA_RAB_PATHWAY	1	1	387	12	0
BIOCARTA_RACCYCD_PATHWAY	BIOCARTA_RACCYCD_PATHWAY	1	1	387	26	0
BIOCARTA_RANKL_PATHWAY	BIOCARTA_RANKL_PATHWAY	1	1	387	14	0
BIOCARTA_RANMS_PATHWAY	BIOCARTA_RANMS_PATHWAY	1	1	387	10	0
BIOCARTA_RARRXR_PATHWAY	BIOCARTA_RARRXR_PATHWAY	1	1	387	15	0
BIOCARTA_RELA_PATHWAY	BIOCARTA_RELA_PATHWAY	1	1	387	16	0
BIOCARTA_SALMONELLA_PATHWAY	BIOCARTA_SALMONELLA_PATHWAY	1	1	387	13	0
BIOCARTA_SARS_PATHWAY	BIOCARTA_SARS_PATHWAY	1	1	387	10	0
BIOCARTA_SET_PATHWAY	BIOCARTA_SET_PATHWAY	1	1	387	11	0
BIOCARTA_SKP2E2F_PATHWAY	BIOCARTA_SKP2E2F_PATHWAY	1	1	387	10	0
BIOCARTA_SODD_PATHWAY	BIOCARTA_SODD_PATHWAY	1	1	387	10	0
BIOCARTA_SPPA_PATHWAY	BIOCARTA_SPPA_PATHWAY	1	1	387	22	0
BIOCARTA_SRCRPTP_PATHWAY	BIOCARTA_SRCRPTP_PATHWAY	1	1	387	11	0
BIOCARTA_STATHMIN_PATHWAY	BIOCARTA_STATHMIN_PATHWAY	1	1	387	19	0
BIOCARTA_STEM_PATHWAY	BIOCARTA_STEM_PATHWAY	1	1	387	14	0
BIOCARTA_STRESS_PATHWAY	BIOCARTA_STRESS_PATHWAY	1	1	387	25	0
BIOCARTA_TALL1_PATHWAY	BIOCARTA_TALL1_PATHWAY	1	1	387	15	0
BIOCARTA_TNFR1_PATHWAY	BIOCARTA_TNFR1_PATHWAY	1	1	387	29	0
BIOCARTA_TNFR2_PATHWAY	BIOCARTA_TNFR2_PATHWAY	1	1	387	17	0
BIOCARTA_TOB1_PATHWAY	BIOCARTA_TOB1_PATHWAY	1	1	387	19	0
BIOCARTA_TOLL_PATHWAY	BIOCARTA_TOLL_PATHWAY	1	1	387	37	0
BIOCARTA_TRKA_PATHWAY	BIOCARTA_TRKA_PATHWAY	1	1	387	12	0
BIOCARTA_UCALPAIN_PATHWAY	BIOCARTA_UCALPAIN_PATHWAY	1	1	387	18	0
BIOCARTA_VDR_PATHWAY	BIOCARTA_VDR_PATHWAY	1	1	387	12	0
BIOCARTA_VITCB_PATHWAY	BIOCARTA_VITCB_PATHWAY	1	1	387	11	0
BIOCARTA_WNT_PATHWAY	BIOCARTA_WNT_PATHWAY	1	1	387	26	0
BIOGENIC_AMINE_METABOLIC_PROCESS	BIOGENIC_AMINE_METABOLIC_PROCESS	1	1	387	17	0
BIOPOLYMER_BIOSYNTHETIC_PROCESS	BIOPOLYMER_BIOSYNTHETIC_PROCESS	1	1	387	14	0
BIOPOLYMER_CATABOLIC_PROCESS	BIOPOLYMER_CATABOLIC_PROCESS	1	1	387	113	0
BODY_FLUID_SECRETION	BODY_FLUID_SECRETION	1	1	387	10	0
BRUSH_BORDER	BRUSH_BORDER	1	1	387	10	0
CALCIUM_CHANNEL_ACTIVITY	CALCIUM_CHANNEL_ACTIVITY	1	1	387	33	0
CALCIUM_ION_TRANSMEMBRANE_TRANSPORTER_ACTIVITY	CALCIUM_ION_TRANSMEMBRANE_TRANSPORTER_ACTIVITY	1	1	387	11	0
CALCIUM_ION_TRANSPORT	CALCIUM_ION_TRANSPORT	1	1	387	27	0
CARBOHYDRATE_CATABOLIC_PROCESS	CARBOHYDRATE_CATABOLIC_PROCESS	1	1	387	24	0
CARBOHYDRATE_TRANSMEMBRANE_TRANSPORTER_ACTIVITY	CARBOHYDRATE_TRANSMEMBRANE_TRANSPORTER_ACTIVITY	1	1	387	16	0
CARBOHYDRATE_TRANSPORT	CARBOHYDRATE_TRANSPORT	1	1	387	19	0
CARBONATE_DEHYDRATASE_ACTIVITY	CARBONATE_DEHYDRATASE_ACTIVITY	1	1	387	13	0
CARBOXYLESTERASE_ACTIVITY	CARBOXYLESTERASE_ACTIVITY	1	1	387	33	0
CARBOXYLIC_ACID_METABOLIC_PROCESS	CARBOXYLIC_ACID_METABOLIC_PROCESS	0.710394	1	387	177	1	SLC6A14
CARBOXYLIC_ACID_TRANSPORT	CARBOXYLIC_ACID_TRANSPORT	1	1	387	41	0
CARBOXYPEPTIDASE_ACTIVITY	CARBOXYPEPTIDASE_ACTIVITY	1	1	387	11	0
CASPASE_REGULATOR_ACTIVITY	CASPASE_REGULATOR_ACTIVITY	1	1	387	14	0
CATION_CHANNEL_ACTIVITY	CATION_CHANNEL_ACTIVITY	1	1	387	118	0
CATION_HOMEOSTASIS	CATION_HOMEOSTASIS	1	1	387	108	0
CATION_TRANSPORTING_ATPASE_ACTIVITY	CATION_TRANSPORTING_ATPASE_ACTIVITY	1	1	387	11	0
CELL_CORTEX_PART	CELL_CORTEX_PART	1	1	387	24	0
CELL_CYCLE_CHECKPOINT_GO_0000075	CELL_CYCLE_CHECKPOINT_GO_0000075	1	1	387	47	0
CELL_DIVISION	CELL_DIVISION	1	1	387	21	0
CELL_FATE_COMMITMENT	CELL_FATE_COMMITMENT	1	1	387	13	0
CELL_MATRIX_ADHESION	CELL_MATRIX_ADHESION	1	1	387	37	0
CELL_MATRIX_JUNCTION	CELL_MATRIX_JUNCTION	1	1	387	17	0
CELL_PROJECTION	CELL_PROJECTION	1	1	387	107	0
CELL_PROJECTION_BIOGENESIS	CELL_PROJECTION_BIOGENESIS	1	1	387	25	0
CELL_PROJECTION_PART	CELL_PROJECTION_PART	1	1	387	19	0
CELL_SOMA	CELL_SOMA	1	1	387	10	0
CELL_STRUCTURE_DISASSEMBLY_DURING_APOPTOSIS	CELL_STRUCTURE_DISASSEMBLY_DURING_APOPTOSIS	1	1	387	18	0
CELL_SUBSTRATE_ADHERENS_JUNCTION	CELL_SUBSTRATE_ADHERENS_JUNCTION	1	1	387	16	0
CELL_SUBSTRATE_ADHESION	CELL_SUBSTRATE_ADHESION	1	1	387	38	0
CELLULAR_CARBOHYDRATE_CATABOLIC_PROCESS	CELLULAR_CARBOHYDRATE_CATABOLIC_PROCESS	1	1	387	23	0
CELLULAR_CATION_HOMEOSTASIS	CELLULAR_CATION_HOMEOSTASIS	1	1	387	105	0
CELLULAR_COMPONENT_DISASSEMBLY	CELLULAR_COMPONENT_DISASSEMBLY	1	1	387	31	0
CELLULAR_LIPID_CATABOLIC_PROCESS	CELLULAR_LIPID_CATABOLIC_PROCESS	1	1	387	35	0
CELLULAR_MACROMOLECULE_CATABOLIC_PROCESS	CELLULAR_MACROMOLECULE_CATABOLIC_PROCESS	1	1	387	100	0
CELLULAR_MONOVALENT_INORGANIC_CATION_HOMEOSTASIS	CELLULAR_MONOVALENT_INORGANIC_CATION_HOMEOSTASIS	1	1	387	11	0
CELLULAR_POLYSACCHARIDE_METABOLIC_PROCESS	CELLULAR_POLYSACCHARIDE_METABOLIC_PROCESS	1	1	387	16	0
CELLULAR_PROTEIN_CATABOLIC_PROCESS	CELLULAR_PROTEIN_CATABOLIC_PROCESS	1	1	387	54	0
CELLULAR_PROTEIN_COMPLEX_DISASSEMBLY	CELLULAR_PROTEIN_COMPLEX_DISASSEMBLY	1	1	387	11	0
CELLULAR_RESPIRATION	CELLULAR_RESPIRATION	1	1	387	19	0
CENTROSOME_CYCLE	CENTROSOME_CYCLE	1	1	387	11	0
CENTROSOME_ORGANIZATION_AND_BIOGENESIS	CENTROSOME_ORGANIZATION_AND_BIOGENESIS	1	1	387	15	0
CERAMIDE_METABOLIC_PROCESS	CERAMIDE_METABOLIC_PROCESS	1	1	387	11	0
CHANNEL_REGULATOR_ACTIVITY	CHANNEL_REGULATOR_ACTIVITY	1	1	387	23	0
CHAPERONE_BINDING	CHAPERONE_BINDING	1	1	387	11	0
CHLORIDE_CHANNEL_ACTIVITY	CHLORIDE_CHANNEL_ACTIVITY	1	1	387	19	0
CHROMATIN	CHROMATIN	1	1	387	35	0
CHROMATIN_MODIFICATION	CHROMATIN_MODIFICATION	1	1	387	54	0
CHROMATIN_REMODELING	CHROMATIN_REMODELING	1	1	387	25	0
CHROMOSOMAL_PART	CHROMOSOMAL_PART	1	1	387	94	0
CHROMOSOME	CHROMOSOME	1	1	387	120	0
CHROMOSOME_CONDENSATION	CHROMOSOME_CONDENSATION	1	1	387	10	0
CHROMOSOME_ORGANIZATION_AND_BIOGENESIS	CHROMOSOME_ORGANIZATION_AND_BIOGENESIS	0.571186	1	387	121	1	NAP1L2
CHROMOSOME_SEGREGATION	CHROMOSOME_SEGREGATION	1	1	387	32	0
CHROMOSOMEPERICENTRIC_REGION	CHROMOSOMEPERICENTRIC_REGION	1	1	387	30	0
CIRCADIAN_RHYTHM	CIRCADIAN_RHYTHM	1	1	387	14	0
COENZYME_BINDING	COENZYME_BINDING	1	1	387	16	0
COENZYME_BIOSYNTHETIC_PROCESS	COENZYME_BIOSYNTHETIC_PROCESS	1	1	387	10	0
COENZYME_METABOLIC_PROCESS	COENZYME_METABOLIC_PROCESS	1	1	387	37	0
COFACTOR_BINDING	COFACTOR_BINDING	1	1	387	22	0
COFACTOR_BIOSYNTHETIC_PROCESS	COFACTOR_BIOSYNTHETIC_PROCESS	1	1	387	21	0
COFACTOR_CATABOLIC_PROCESS	COFACTOR_CATABOLIC_PROCESS	1	1	387	10	0
COFACTOR_METABOLIC_PROCESS	COFACTOR_METABOLIC_PROCESS	1	1	387	53	0
COFACTOR_TRANSPORTER_ACTIVITY	COFACTOR_TRANSPORTER_ACTIVITY	1	1	387	10	0
COLLAGEN_BINDING	COLLAGEN_BINDING	1	1	387	13	0
CONDENSED_CHROMOSOME	CONDENSED_CHROMOSOME	1	1	387	32	0
CONDENSED_NUCLEAR_CHROMOSOME	CONDENSED_NUCLEAR_CHROMOSOME	1	1	387	16	0
CORTICAL_ACTIN_CYTOSKELETON	CORTICAL_ACTIN_CYTOSKELETON	1	1	387	13	0
CORTICAL_CYTOSKELETON	CORTICAL_CYTOSKELETON	1	1	387	20	0
COVALENT_CHROMATIN_MODIFICATION	COVALENT_CHROMATIN_MODIFICATION	1	1	387	24	0
CYCLASE_ACTIVITY	CYCLASE_ACTIVITY	1	1	387	8	0
CYCLIC_NUCLEOTIDE_METABOLIC_PROCESS	CYCLIC_NUCLEOTIDE_METABOLIC_PROCESS	1	1	387	11	0
CYCLIC_NUCLEOTIDE_PHOSPHODIESTERASE_ACTIVITY	CYCLIC_NUCLEOTIDE_PHOSPHODIESTERASE_ACTIVITY	1	1	387	14	0
CYTOCHROME_C_OXIDASE_ACTIVITY	CYTOCHROME_C_OXIDASE_ACTIVITY	1	1	387	13	0
CYTOKINE_AND_CHEMOKINE_MEDIATED_SIGNALING_PATHWAY	CYTOKINE_AND_CHEMOKINE_MEDIATED_SIGNALING_PATHWAY	1	1	387	22	0
CYTOKINE_BIOSYNTHETIC_PROCESS	CYTOKINE_BIOSYNTHETIC_PROCESS	1	1	387	41	0
CYTOKINE_METABOLIC_PROCESS	CYTOKINE_METABOLIC_PROCESS	1	1	387	42	0
CYTOKINE_PRODUCTION	CYTOKINE_PRODUCTION	1	1	387	73	0
CYTOKINE_SECRETION	CYTOKINE_SECRETION	1	1	387	18	0
CYTOKINESIS	CYTOKINESIS	1	1	387	19	0
CYTOSKELETON_DEPENDENT_INTRACELLULAR_TRANSPORT	CYTOSKELETON_DEPENDENT_INTRACELLULAR_TRANSPORT	1	1	387	26	0
CYTOSOLIC_PART	CYTOSOLIC_PART	1	1	387	21	0
DAMAGED_DNA_BINDING	DAMAGED_DNA_BINDING	1	1	387	21	0
DEACETYLASE_ACTIVITY	DEACETYLASE_ACTIVITY	1	1	387	11	0
DEAMINASE_ACTIVITY	DEAMINASE_ACTIVITY	1	1	387	14	0
DEFENSE_RESPONSE_TO_BACTERIUM	DEFENSE_RESPONSE_TO_BACTERIUM	1	1	387	25	0
DEFENSE_RESPONSE_TO_VIRUS	DEFENSE_RESPONSE_TO_VIRUS	1	1	387	10	0
DELAYED_RECTIFIER_POTASSIUM_CHANNEL_ACTIVITY	DELAYED_RECTIFIER_POTASSIUM_CHANNEL_ACTIVITY	1	1	387	12	0
DENDRITE	DENDRITE	1	1	387	16	0
DEOXYRIBONUCLEASE_ACTIVITY	DEOXYRIBONUCLEASE_ACTIVITY	1	1	387	21	0
DETECTION_OF_ABIOTIC_STIMULUS	DETECTION_OF_ABIOTIC_STIMULUS	1	1	387	19	0
DETECTION_OF_BIOTIC_STIMULUS	DETECTION_OF_BIOTIC_STIMULUS	1	1	387	10	0
DETECTION_OF_CHEMICAL_STIMULUS	DETECTION_OF_CHEMICAL_STIMULUS	1	1	387	18	0
DETECTION_OF_EXTERNAL_STIMULUS	DETECTION_OF_EXTERNAL_STIMULUS	1	1	387	23	0
DETECTION_OF_STIMULUS	DETECTION_OF_STIMULUS	1	1	387	47	0
DETECTION_OF_STIMULUS_INVOLVED_IN_SENSORY_PERCEPTION	DETECTION_OF_STIMULUS_INVOLVED_IN_SENSORY_PERCEPTION	1	1	387	21	0
DEVELOPMENT_OF_PRIMARY_SEXUAL_CHARACTERISTICS	DEVELOPMENT_OF_PRIMARY_SEXUAL_CHARACTERISTICS	1	1	387	26	0
DI___TRI_VALENT_INORGANIC_CATION_TRANSMEMBRANE_TRANSPORTER_ACTIVITY	DI___TRI_VALENT_INORGANIC_CATION_TRANSMEMBRANE_TRANSPORTER_ACTIVITY	1	1	387	22	0
DI___TRI_VALENT_INORGANIC_CATION_TRANSPORT	DI___TRI_VALENT_INORGANIC_CATION_TRANSPORT	1	1	387	32	0
DIGESTION	DIGESTION	1	1	387	43	0
DNA_CATABOLIC_PROCESS	DNA_CATABOLIC_PROCESS	1	1	387	23	0
DNA_DAMAGE_CHECKPOINT	DNA_DAMAGE_CHECKPOINT	1	1	387	19	0
DNA_DEPENDENT_DNA_REPLICATION	DNA_DEPENDENT_DNA_REPLICATION	1	1	387	56	0
DNA_DIRECTED_DNA_POLYMERASE_ACTIVITY	DNA_DIRECTED_DNA_POLYMERASE_ACTIVITY	1	1	387	14	0
DNA_DIRECTED_RNA_POLYMERASE_COMPLEX	DNA_DIRECTED_RNA_POLYMERASE_COMPLEX	1	1	387	17	0
DNA_DIRECTED_RNA_POLYMERASEII_CORE_COMPLEX	DNA_DIRECTED_RNA_POLYMERASEII_CORE_COMPLEX	1	1	387	12	0
DNA_DIRECTED_RNA_POLYMERASEII_HOLOENZYME	DNA_DIRECTED_RNA_POLYMERASEII_HOLOENZYME	1	1	387	63	0
DNA_FRAGMENTATION_DURING_APOPTOSIS	DNA_FRAGMENTATION_DURING_APOPTOSIS	1	1	387	13	0
DNA_HELICASE_ACTIVITY	DNA_HELICASE_ACTIVITY	1	1	387	25	0
DNA_INTEGRITY_CHECKPOINT	DNA_INTEGRITY_CHECKPOINT	1	1	387	23	0
DNA_MODIFICATION	DNA_MODIFICATION	1	1	387	11	0
DNA_POLYMERASE_ACTIVITY	DNA_POLYMERASE_ACTIVITY	1	1	387	18	0
DNA_RECOMBINATION	DNA_RECOMBINATION	1	1	387	46	0
DNA_REPAIR	DNA_REPAIR	0.577152	1	387	123	1	TP53
DNA_REPLICATION	DNA_REPLICATION	1	1	387	101	0
DNA_REPLICATION_INITIATION	DNA_REPLICATION_INITIATION	1	1	387	16	0
DOUBLE_STRAND_BREAK_REPAIR	DOUBLE_STRAND_BREAK_REPAIR	1	1	387	21	0
DOUBLE_STRANDED_RNA_BINDING	DOUBLE_STRANDED_RNA_BINDING	1	1	387	17	0
DRUG_BINDING	DRUG_BINDING	1	1	387	16	0
DYSTROPHIN_ASSOCIATED_GLYCOPROTEIN_COMPLEX	DYSTROPHIN_ASSOCIATED_GLYCOPROTEIN_COMPLEX	1	1	387	14	0
EARLY_ENDOSOME	EARLY_ENDOSOME	1	1	387	17	0
ELECTRON_CARRIER_ACTIVITY	ELECTRON_CARRIER_ACTIVITY	0.420514	1	387	78	1	NCF2
ELECTRON_TRANSPORT_GO_0006118	ELECTRON_TRANSPORT_GO_0006118	1	1	387	51	0
EMBRYO_IMPLANTATION	EMBRYO_IMPLANTATION	1	1	387	14	0
ENDODEOXYRIBONUCLEASE_ACTIVITY	ENDODEOXYRIBONUCLEASE_ACTIVITY	1	1	387	10	0
ENDONUCLEASE_ACTIVITY	ENDONUCLEASE_ACTIVITY	1	1	387	24	0
ENDONUCLEASE_ACTIVITY_GO_0016893	ENDONUCLEASE_ACTIVITY_GO_0016893	1	1	387	11	0
ENDOPLASMIC_RETICULUM_MEMBRANE	ENDOPLASMIC_RETICULUM_MEMBRANE	0.440447	1	387	83	1	SPINK5
ENDORIBONUCLEASE_ACTIVITY	ENDORIBONUCLEASE_ACTIVITY	1	1	387	13	0
ENDOSOME_TRANSPORT	ENDOSOME_TRANSPORT	1	1	387	23	0
ENDOTHELIAL_CELL_MIGRATION	ENDOTHELIAL_CELL_MIGRATION	1	1	387	11	0
ENDOTHELIAL_CELL_PROLIFERATION	ENDOTHELIAL_CELL_PROLIFERATION	1	1	387	11	0
ENVELOPE	ENVELOPE	0.664455	1	387	156	1	PTGER3
ENZYME_ACTIVATOR_ACTIVITY	ENZYME_ACTIVATOR_ACTIVITY	0.577152	1	387	123	1	RASAL1
EPITHELIAL_TO_MESENCHYMAL_TRANSITION	EPITHELIAL_TO_MESENCHYMAL_TRANSITION	1	1	387	10	0
ER_GOLGI_INTERMEDIATE_COMPARTMENT	ER_GOLGI_INTERMEDIATE_COMPARTMENT	1	1	387	24	0
ER_TO_GOLGI_VESICLE_MEDIATED_TRANSPORT	ER_TO_GOLGI_VESICLE_MEDIATED_TRANSPORT	1	1	387	18	0
ESTABLISHMENT_AND_OR_MAINTENANCE_OF_CELL_POLARITY	ESTABLISHMENT_AND_OR_MAINTENANCE_OF_CELL_POLARITY	1	1	387	19	0
ESTABLISHMENT_AND_OR_MAINTENANCE_OF_CHROMATIN_ARCHITECTURE	ESTABLISHMENT_AND_OR_MAINTENANCE_OF_CHROMATIN_ARCHITECTURE	0.412345	1	387	76	1	NAP1L2
ESTABLISHMENT_OF_ORGANELLE_LOCALIZATION	ESTABLISHMENT_OF_ORGANELLE_LOCALIZATION	1	1	387	18	0
ESTABLISHMENT_OF_VESICLE_LOCALIZATION	ESTABLISHMENT_OF_VESICLE_LOCALIZATION	1	1	387	10	0
EUKARYOTIC_TRANSLATION_INITIATION_FACTOR_3_COMPLEX	EUKARYOTIC_TRANSLATION_INITIATION_FACTOR_3_COMPLEX	1	1	387	10	0
EXCITATORY_EXTRACELLULAR_LIGAND_GATED_ION_CHANNEL_ACTIVITY	EXCITATORY_EXTRACELLULAR_LIGAND_GATED_ION_CHANNEL_ACTIVITY	1	1	387	21	0
EXONUCLEASE_ACTIVITY	EXONUCLEASE_ACTIVITY	1	1	387	18	0
EXTERNAL_SIDE_OF_PLASMA_MEMBRANE	EXTERNAL_SIDE_OF_PLASMA_MEMBRANE	1	1	387	16	0
EXTRACELLULAR_LIGAND_GATED_ION_CHANNEL_ACTIVITY	EXTRACELLULAR_LIGAND_GATED_ION_CHANNEL_ACTIVITY	1	1	387	22	0
EXTRACELLULAR_MATRIX_STRUCTURAL_CONSTITUENT	EXTRACELLULAR_MATRIX_STRUCTURAL_CONSTITUENT	1	1	387	26	0
FATTY_ACID_BETA_OXIDATION	FATTY_ACID_BETA_OXIDATION	1	1	387	11	0
FATTY_ACID_BIOSYNTHETIC_PROCESS	FATTY_ACID_BIOSYNTHETIC_PROCESS	1	1	387	14	0
FATTY_ACID_METABOLIC_PROCESS	FATTY_ACID_METABOLIC_PROCESS	1	1	387	63	0
FATTY_ACID_OXIDATION	FATTY_ACID_OXIDATION	1	1	387	18	0
FEEDING_BEHAVIOR	FEEDING_BEHAVIOR	1	1	387	23	0
FEMALE_GAMETE_GENERATION	FEMALE_GAMETE_GENERATION	1	1	387	16	0
FOCAL_ADHESION	FOCAL_ADHESION	1	1	387	13	0
FOCAL_ADHESION_FORMATION	FOCAL_ADHESION_FORMATION	1	1	387	10	0
FUCOSYLTRANSFERASE_ACTIVITY	FUCOSYLTRANSFERASE_ACTIVITY	1	1	387	10	0
G2_M_TRANSITION_OF_MITOTIC_CELL_CYCLE	G2_M_TRANSITION_OF_MITOTIC_CELL_CYCLE	1	1	387	13	0
G_PROTEIN_SIGNALING_ADENYLATE_CYCLASE_INHIBITING_PATHWAY	G_PROTEIN_SIGNALING_ADENYLATE_CYCLASE_INHIBITING_PATHWAY	1	1	387	10	0
GABA_RECEPTOR_ACTIVITY	GABA_RECEPTOR_ACTIVITY	1	1	387	11	0
GALACTOSYLTRANSFERASE_ACTIVITY	GALACTOSYLTRANSFERASE_ACTIVITY	1	1	387	16	0
GATED_CHANNEL_ACTIVITY	GATED_CHANNEL_ACTIVITY	1	1	387	121	0
GENE_SILENCING	GENE_SILENCING	1	1	387	10	0
GENERATION_OF_PRECURSOR_METABOLITES_AND_ENERGY	GENERATION_OF_PRECURSOR_METABOLITES_AND_ENERGY	0.571186	1	387	121	1	GFPT2
GLAND_DEVELOPMENT	GLAND_DEVELOPMENT	1	1	387	13	0
GLIOGENESIS	GLIOGENESIS	1	1	387	11	0
GLUCAN_METABOLIC_PROCESS	GLUCAN_METABOLIC_PROCESS	1	1	387	10	0
GLUCOSAMINE_METABOLIC_PROCESS	GLUCOSAMINE_METABOLIC_PROCESS	1	1	387	12	0
GLUCOSE_CATABOLIC_PROCESS	GLUCOSE_CATABOLIC_PROCESS	1	1	387	11	0
GLUCOSE_METABOLIC_PROCESS	GLUCOSE_METABOLIC_PROCESS	1	1	387	27	0
GLUTAMATE_RECEPTOR_ACTIVITY	GLUTAMATE_RECEPTOR_ACTIVITY	1	1	387	20	0
GLUTAMATE_SIGNALING_PATHWAY	GLUTAMATE_SIGNALING_PATHWAY	1	1	387	17	0
GLUTAMINE_FAMILY_AMINO_ACID_METABOLIC_PROCESS	GLUTAMINE_FAMILY_AMINO_ACID_METABOLIC_PROCESS	1	1	387	14	0
GLUTATHIONE_TRANSFERASE_ACTIVITY	GLUTATHIONE_TRANSFERASE_ACTIVITY	1	1	387	14	0
GLYCEROPHOSPHOLIPID_BIOSYNTHETIC_PROCESS	GLYCEROPHOSPHOLIPID_BIOSYNTHETIC_PROCESS	1	1	387	30	0
GLYCEROPHOSPHOLIPID_METABOLIC_PROCESS	GLYCEROPHOSPHOLIPID_METABOLIC_PROCESS	1	1	387	46	0
GLYCOLIPID_METABOLIC_PROCESS	GLYCOLIPID_METABOLIC_PROCESS	1	1	387	15	0
GLYCOPROTEIN_CATABOLIC_PROCESS	GLYCOPROTEIN_CATABOLIC_PROCESS	1	1	387	12	0
GLYCOPROTEIN_METABOLIC_PROCESS	GLYCOPROTEIN_METABOLIC_PROCESS	0.463464	1	387	89	1	CD37
GLYCOSPHINGOLIPID_METABOLIC_PROCESS	GLYCOSPHINGOLIPID_METABOLIC_PROCESS	1	1	387	11	0
GOLGI_APPARATUS_PART	GOLGI_APPARATUS_PART	0.492692	1	387	97	1	CAV1
GOLGI_ASSOCIATED_VESICLE	GOLGI_ASSOCIATED_VESICLE	1	1	387	27	0
GOLGI_STACK	GOLGI_STACK	1	1	387	13	0
GOLGI_VESICLE_TRANSPORT	GOLGI_VESICLE_TRANSPORT	1	1	387	48	0
GROWTH_CONE	GROWTH_CONE	1	1	387	10	0
GROWTH_FACTOR_BINDING	GROWTH_FACTOR_BINDING	1	1	387	31	0
GTPASE_ACTIVITY	GTPASE_ACTIVITY	0.496232	1	387	98	1	GNA14
GTPASE_BINDING	GTPASE_BINDING	1	1	387	34	0
GTPASE_REGULATOR_ACTIVITY	GTPASE_REGULATOR_ACTIVITY	0.580104	1	387	124	1	RASAL1
GUANYL_NUCLEOTIDE_EXCHANGE_FACTOR_ACTIVITY	GUANYL_NUCLEOTIDE_EXCHANGE_FACTOR_ACTIVITY	1	1	387	46	0
HEART_DEVELOPMENT	HEART_DEVELOPMENT	1	1	387	37	0
HEMATOPOIETIN_INTERFERON_CLASSD200_DOMAIN_CYTOKINE_RECEPTOR_ACTIVITY	HEMATOPOIETIN_INTERFERON_CLASSD200_DOMAIN_CYTOKINE_RECEPTOR_ACTIVITY	1	1	387	33	0
HEMATOPOIETIN_INTERFERON_CLASSD200_DOMAIN_CYTOKINE_RECEPTOR_BINDING	HEMATOPOIETIN_INTERFERON_CLASSD200_DOMAIN_CYTOKINE_RECEPTOR_BINDING	1	1	387	29	0
HEME_BIOSYNTHETIC_PROCESS	HEME_BIOSYNTHETIC_PROCESS	1	1	387	10	0
HEME_METABOLIC_PROCESS	HEME_METABOLIC_PROCESS	1	1	387	11	0
HETEROCYCLE_METABOLIC_PROCESS	HETEROCYCLE_METABOLIC_PROCESS	1	1	387	27	0
HETEROGENEOUS_NUCLEAR_RIBONUCLEOPROTEIN_COMPLEX	HETEROGENEOUS_NUCLEAR_RIBONUCLEOPROTEIN_COMPLEX	1	1	387	13	0
HISTONE_ACETYLTRANSFERASE_ACTIVITY	HISTONE_ACETYLTRANSFERASE_ACTIVITY	1	1	387	16	0
HISTONE_DEACETYLASE_BINDING	HISTONE_DEACETYLASE_BINDING	1	1	387	10	0
HISTONE_DEACETYLASE_COMPLEX	HISTONE_DEACETYLASE_COMPLEX	1	1	387	20	0
HISTONE_METHYLTRANSFERASE_ACTIVITY	HISTONE_METHYLTRANSFERASE_ACTIVITY	1	1	387	10	0
HISTONE_MODIFICATION	HISTONE_MODIFICATION	1	1	387	23	0
HORMONE_ACTIVITY	HORMONE_ACTIVITY	1	1	387	43	0
HORMONE_METABOLIC_PROCESS	HORMONE_METABOLIC_PROCESS	1	1	387	32	0
HORMONE_RECEPTOR_BINDING	HORMONE_RECEPTOR_BINDING	1	1	387	29	0
HUMORAL_IMMUNE_RESPONSE	HUMORAL_IMMUNE_RESPONSE	1	1	387	32	0
HYDROGEN_ION_TRANSMEMBRANE_TRANSPORTER_ACTIVITY	HYDROGEN_ION_TRANSMEMBRANE_TRANSPORTER_ACTIVITY	1	1	387	27	0
HYDROLASE_ACTIVITY_ACTING_ON_CARBON_NITROGEN_NOT_PEPTIDEBONDSIN_CYCLIC_AMIDINES	HYDROLASE_ACTIVITY_ACTING_ON_CARBON_NITROGEN_NOT_PEPTIDEBONDSIN_CYCLIC_AMIDINES	1	1	387	16	0
HYDROLASE_ACTIVITY_HYDROLYZING_O_GLYCOSYL_COMPOUNDS	HYDROLASE_ACTIVITY_HYDROLYZING_O_GLYCOSYL_COMPOUNDS	1	1	387	37	0
I_KAPPAB_KINASE_NF_KAPPAB_CASCADE	I_KAPPAB_KINASE_NF_KAPPAB_CASCADE	0.546469	1	387	113	1	WLS
ICOSANOID_METABOLIC_PROCESS	ICOSANOID_METABOLIC_PROCESS	1	1	387	17	0
IMMUNE_EFFECTOR_PROCESS	IMMUNE_EFFECTOR_PROCESS	1	1	387	36	0
IMMUNOLOGICAL_SYNAPSE	IMMUNOLOGICAL_SYNAPSE	1	1	387	11	0
INACTIVATION_OF_MAPK_ACTIVITY	INACTIVATION_OF_MAPK_ACTIVITY	1	1	387	14	0
INDUCTION_OF_APOPTOSIS_BY_EXTRACELLULAR_SIGNALS	INDUCTION_OF_APOPTOSIS_BY_EXTRACELLULAR_SIGNALS	1	1	387	27	0
INFLAMMATORY_RESPONSE	INFLAMMATORY_RESPONSE	0.585947	1	387	126	1	S100A9
INNATE_IMMUNE_RESPONSE	INNATE_IMMUNE_RESPONSE	1	1	387	23	0
INORGANIC_ANION_TRANSMEMBRANE_TRANSPORTER_ACTIVITY	INORGANIC_ANION_TRANSMEMBRANE_TRANSPORTER_ACTIVITY	1	1	387	19	0
INOSITOL_OR_PHOSPHATIDYLINOSITOL_KINASE_ACTIVITY	INOSITOL_OR_PHOSPHATIDYLINOSITOL_KINASE_ACTIVITY	1	1	387	18	0
INOSITOL_OR_PHOSPHATIDYLINOSITOL_PHOSPHATASE_ACTIVITY	INOSITOL_OR_PHOSPHATIDYLINOSITOL_PHOSPHATASE_ACTIVITY	1	1	387	12	0
INOSITOL_OR_PHOSPHATIDYLINOSITOL_PHOSPHODIESTERASE_ACTIVITY	INOSITOL_OR_PHOSPHATIDYLINOSITOL_PHOSPHODIESTERASE_ACTIVITY	1	1	387	13	0
INTEGRAL_TO_ENDOPLASMIC_RETICULUM_MEMBRANE	INTEGRAL_TO_ENDOPLASMIC_RETICULUM_MEMBRANE	1	1	387	23	0
INTEGRAL_TO_GOLGI_MEMBRANE	INTEGRAL_TO_GOLGI_MEMBRANE	1	1	387	9	0
INTEGRAL_TO_ORGANELLE_MEMBRANE	INTEGRAL_TO_ORGANELLE_MEMBRANE	1	1	387	48	0
INTEGRATOR_COMPLEX	INTEGRATOR_COMPLEX	1	1	387	11	0
INTERACTION_WITH_HOST	INTERACTION_WITH_HOST	1	1	387	17	0
INTERFERON_GAMMA_BIOSYNTHETIC_PROCESS	INTERFERON_GAMMA_BIOSYNTHETIC_PROCESS	1	1	387	12	0
INTERFERON_GAMMA_PRODUCTION	INTERFERON_GAMMA_PRODUCTION	1	1	387	14	0
INTERLEUKIN_1_SECRETION	INTERLEUKIN_1_SECRETION	1	1	387	10	0
INTERLEUKIN_2_PRODUCTION	INTERLEUKIN_2_PRODUCTION	1	1	387	11	0
INTERLEUKIN_8_BIOSYNTHETIC_PROCESS	INTERLEUKIN_8_BIOSYNTHETIC_PROCESS	1	1	387	10	0
INTERLEUKIN_8_PRODUCTION	INTERLEUKIN_8_PRODUCTION	1	1	387	12	0
INTERLEUKIN_BINDING	INTERLEUKIN_BINDING	1	1	387	25	0
INTERLEUKIN_RECEPTOR_ACTIVITY	INTERLEUKIN_RECEPTOR_ACTIVITY	1	1	387	20	0
INTRA_GOLGI_VESICLE_MEDIATED_TRANSPORT	INTRA_GOLGI_VESICLE_MEDIATED_TRANSPORT	1	1	387	12	0
INTRACELLULAR_PROTEIN_TRANSPORT	INTRACELLULAR_PROTEIN_TRANSPORT	0.62986	1	387	142	1	CDH1
INTRACELLULAR_RECEPTOR_MEDIATED_SIGNALING_PATHWAY	INTRACELLULAR_RECEPTOR_MEDIATED_SIGNALING_PATHWAY	1	1	387	21	0
INTRINSIC_TO_ENDOPLASMIC_RETICULUM_MEMBRANE	INTRINSIC_TO_ENDOPLASMIC_RETICULUM_MEMBRANE	1	1	387	23	0
INTRINSIC_TO_GOLGI_MEMBRANE	INTRINSIC_TO_GOLGI_MEMBRANE	1	1	387	14	0
INTRINSIC_TO_ORGANELLE_MEMBRANE	INTRINSIC_TO_ORGANELLE_MEMBRANE	1	1	387	50	0
INWARD_RECTIFIER_POTASSIUM_CHANNEL_ACTIVITY	INWARD_RECTIFIER_POTASSIUM_CHANNEL_ACTIVITY	1	1	387	12	0
ION_CHANNEL_ACTIVITY	ION_CHANNEL_ACTIVITY	1	1	387	147	0
IONOTROPIC_GLUTAMATE_RECEPTOR_ACTIVITY	IONOTROPIC_GLUTAMATE_RECEPTOR_ACTIVITY	1	1	387	10	0
ISOPRENOID_METABOLIC_PROCESS	ISOPRENOID_METABOLIC_PROCESS	1	1	387	12	0
KEGG_ALPHA_LINOLENIC_ACID_METABOLISM	KEGG_ALPHA_LINOLENIC_ACID_METABOLISM	1	1	387	19	0
KEGG_AMINOACYL_TRNA_BIOSYNTHESIS	KEGG_AMINOACYL_TRNA_BIOSYNTHESIS	1	1	387	41	0
KEGG_ARGININE_AND_PROLINE_METABOLISM	KEGG_ARGININE_AND_PROLINE_METABOLISM	1	1	387	51	0
KEGG_ASCORBATE_AND_ALDARATE_METABOLISM	KEGG_ASCORBATE_AND_ALDARATE_METABOLISM	1	1	387	25	0
KEGG_BASAL_TRANSCRIPTION_FACTORS	KEGG_BASAL_TRANSCRIPTION_FACTORS	1	1	387	35	0
KEGG_BASE_EXCISION_REPAIR	KEGG_BASE_EXCISION_REPAIR	1	1	387	35	0
KEGG_BETA_ALANINE_METABOLISM	KEGG_BETA_ALANINE_METABOLISM	1	1	387	22	0
KEGG_BUTANOATE_METABOLISM	KEGG_BUTANOATE_METABOLISM	1	1	387	34	0
KEGG_CARDIAC_MUSCLE_CONTRACTION	KEGG_CARDIAC_MUSCLE_CONTRACTION	1	1	387	74	0
KEGG_CIRCADIAN_RHYTHM_MAMMAL	KEGG_CIRCADIAN_RHYTHM_MAMMAL	1	1	387	13	0
KEGG_CITRATE_CYCLE_TCA_CYCLE	KEGG_CITRATE_CYCLE_TCA_CYCLE	1	1	387	30	0
KEGG_CYTOSOLIC_DNA_SENSING_PATHWAY	KEGG_CYTOSOLIC_DNA_SENSING_PATHWAY	1	1	387	55	0
KEGG_DILATED_CARDIOMYOPATHY	KEGG_DILATED_CARDIOMYOPATHY	0.467208	1	387	90	1	ITGB4
KEGG_DNA_REPLICATION	KEGG_DNA_REPLICATION	1	1	387	36	0
KEGG_DRUG_METABOLISM_OTHER_ENZYMES	KEGG_DRUG_METABOLISM_OTHER_ENZYMES	1	1	387	51	0
KEGG_FATTY_ACID_METABOLISM	KEGG_FATTY_ACID_METABOLISM	1	1	387	42	0
KEGG_FC_EPSILON_RI_SIGNALING_PATHWAY	KEGG_FC_EPSILON_RI_SIGNALING_PATHWAY	0.424557	1	387	79	1	LYN
KEGG_FOLATE_BIOSYNTHESIS	KEGG_FOLATE_BIOSYNTHESIS	1	1	387	11	0
KEGG_GLUTATHIONE_METABOLISM	KEGG_GLUTATHIONE_METABOLISM	1	1	387	49	0
KEGG_GLYCEROLIPID_METABOLISM	KEGG_GLYCEROLIPID_METABOLISM	1	1	387	43	0
KEGG_GLYCOSAMINOGLYCAN_BIOSYNTHESIS_HEPARAN_SULFATE	KEGG_GLYCOSAMINOGLYCAN_BIOSYNTHESIS_HEPARAN_SULFATE	1	1	387	26	0
KEGG_GLYCOSAMINOGLYCAN_BIOSYNTHESIS_KERATAN_SULFATE	KEGG_GLYCOSAMINOGLYCAN_BIOSYNTHESIS_KERATAN_SULFATE	1	1	387	14	0
KEGG_GLYCOSAMINOGLYCAN_DEGRADATION	KEGG_GLYCOSAMINOGLYCAN_DEGRADATION	1	1	387	21	0
KEGG_GLYCOSPHINGOLIPID_BIOSYNTHESIS_GANGLIO_SERIES	KEGG_GLYCOSPHINGOLIPID_BIOSYNTHESIS_GANGLIO_SERIES	1	1	387	15	0
KEGG_GLYCOSPHINGOLIPID_BIOSYNTHESIS_GLOBO_SERIES	KEGG_GLYCOSPHINGOLIPID_BIOSYNTHESIS_GLOBO_SERIES	1	1	387	14	0
KEGG_GLYCOSPHINGOLIPID_BIOSYNTHESIS_LACTO_AND_NEOLACTO_SERIES	KEGG_GLYCOSPHINGOLIPID_BIOSYNTHESIS_LACTO_AND_NEOLACTO_SERIES	1	1	387	25	0
KEGG_GLYCOSYLPHOSPHATIDYLINOSITOL_GPI_ANCHOR_BIOSYNTHESIS	KEGG_GLYCOSYLPHOSPHATIDYLINOSITOL_GPI_ANCHOR_BIOSYNTHESIS	1	1	387	25	0
KEGG_GLYOXYLATE_AND_DICARBOXYLATE_METABOLISM	KEGG_GLYOXYLATE_AND_DICARBOXYLATE_METABOLISM	1	1	387	16	0
KEGG_HOMOLOGOUS_RECOMBINATION	KEGG_HOMOLOGOUS_RECOMBINATION	1	1	387	26	0
KEGG_HYPERTROPHIC_CARDIOMYOPATHY_HCM	KEGG_HYPERTROPHIC_CARDIOMYOPATHY_HCM	0.440447	1	387	83	1	ITGB4
KEGG_INSULIN_SIGNALING_PATHWAY	KEGG_INSULIN_SIGNALING_PATHWAY	1	1	387	137	0
KEGG_LIMONENE_AND_PINENE_DEGRADATION	KEGG_LIMONENE_AND_PINENE_DEGRADATION	1	1	387	10	0
KEGG_LINOLEIC_ACID_METABOLISM	KEGG_LINOLEIC_ACID_METABOLISM	1	1	387	29	0
KEGG_LYSOSOME	KEGG_LYSOSOME	0.565135	1	387	119	1	LAMP3
KEGG_MATURITY_ONSET_DIABETES_OF_THE_YOUNG	KEGG_MATURITY_ONSET_DIABETES_OF_THE_YOUNG	1	1	387	25	0
KEGG_MISMATCH_REPAIR	KEGG_MISMATCH_REPAIR	1	1	387	23	0
KEGG_MTOR_SIGNALING_PATHWAY	KEGG_MTOR_SIGNALING_PATHWAY	1	1	387	51	0
KEGG_N_GLYCAN_BIOSYNTHESIS	KEGG_N_GLYCAN_BIOSYNTHESIS	1	1	387	46	0
KEGG_NICOTINATE_AND_NICOTINAMIDE_METABOLISM	KEGG_NICOTINATE_AND_NICOTINAMIDE_METABOLISM	1	1	387	22	0
KEGG_NITROGEN_METABOLISM	KEGG_NITROGEN_METABOLISM	1	1	387	23	0
KEGG_NOD_LIKE_RECEPTOR_SIGNALING_PATHWAY	KEGG_NOD_LIKE_RECEPTOR_SIGNALING_PATHWAY	1	1	387	60	0
KEGG_NON_HOMOLOGOUS_END_JOINING	KEGG_NON_HOMOLOGOUS_END_JOINING	1	1	387	12	0
KEGG_NUCLEOTIDE_EXCISION_REPAIR	KEGG_NUCLEOTIDE_EXCISION_REPAIR	1	1	387	44	0
KEGG_ONE_CARBON_POOL_BY_FOLATE	KEGG_ONE_CARBON_POOL_BY_FOLATE	1	1	387	17	0
KEGG_OOCYTE_MEIOSIS	KEGG_OOCYTE_MEIOSIS	0.536838	1	387	110	1	PGR
KEGG_OTHER_GLYCAN_DEGRADATION	KEGG_OTHER_GLYCAN_DEGRADATION	1	1	387	16	0
KEGG_OXIDATIVE_PHOSPHORYLATION	KEGG_OXIDATIVE_PHOSPHORYLATION	1	1	387	102	0
KEGG_PANTOTHENATE_AND_COA_BIOSYNTHESIS	KEGG_PANTOTHENATE_AND_COA_BIOSYNTHESIS	1	1	387	16	0
KEGG_PARKINSONS_DISEASE	KEGG_PARKINSONS_DISEASE	1	1	387	101	0
KEGG_PENTOSE_AND_GLUCURONATE_INTERCONVERSIONS	KEGG_PENTOSE_AND_GLUCURONATE_INTERCONVERSIONS	1	1	387	27	0
KEGG_PEROXISOME	KEGG_PEROXISOME	1	1	387	78	0
KEGG_PORPHYRIN_AND_CHLOROPHYLL_METABOLISM	KEGG_PORPHYRIN_AND_CHLOROPHYLL_METABOLISM	1	1	387	41	0
KEGG_PRIMARY_BILE_ACID_BIOSYNTHESIS	KEGG_PRIMARY_BILE_ACID_BIOSYNTHESIS	1	1	387	16	0
KEGG_PRIMARY_IMMUNODEFICIENCY	KEGG_PRIMARY_IMMUNODEFICIENCY	1	1	387	35	0
KEGG_PROGESTERONE_MEDIATED_OOCYTE_MATURATION	KEGG_PROGESTERONE_MEDIATED_OOCYTE_MATURATION	0.448227	1	387	85	1	PGR
KEGG_PROPANOATE_METABOLISM	KEGG_PROPANOATE_METABOLISM	1	1	387	32	0
KEGG_PROTEASOME	KEGG_PROTEASOME	1	1	387	45	0
KEGG_PROTEIN_EXPORT	KEGG_PROTEIN_EXPORT	1	1	387	23	0
KEGG_PROXIMAL_TUBULE_BICARBONATE_RECLAMATION	KEGG_PROXIMAL_TUBULE_BICARBONATE_RECLAMATION	1	1	387	23	0
KEGG_PURINE_METABOLISM	KEGG_PURINE_METABOLISM	0.654914	1	387	152	1	APRT
KEGG_PYRIMIDINE_METABOLISM	KEGG_PYRIMIDINE_METABOLISM	1	1	387	96	0
KEGG_REGULATION_OF_AUTOPHAGY	KEGG_REGULATION_OF_AUTOPHAGY	1	1	387	34	0
KEGG_RENAL_CELL_CARCINOMA	KEGG_RENAL_CELL_CARCINOMA	1	1	387	66	0
KEGG_RETINOL_METABOLISM	KEGG_RETINOL_METABOLISM	1	1	387	63	0
KEGG_RIBOFLAVIN_METABOLISM	KEGG_RIBOFLAVIN_METABOLISM	1	1	387	15	0
KEGG_RIBOSOME	KEGG_RIBOSOME	1	1	387	88	0
KEGG_RNA_DEGRADATION	KEGG_RNA_DEGRADATION	1	1	387	57	0
KEGG_RNA_POLYMERASE	KEGG_RNA_POLYMERASE	1	1	387	29	0
KEGG_SMALL_CELL_LUNG_CANCER	KEGG_SMALL_CELL_LUNG_CANCER	0.44435	1	387	84	1	TP53
KEGG_SNARE_INTERACTIONS_IN_VESICULAR_TRANSPORT	KEGG_SNARE_INTERACTIONS_IN_VESICULAR_TRANSPORT	1	1	387	38	0
KEGG_SPLICEOSOME	KEGG_SPLICEOSOME	1	1	387	123	0
KEGG_STARCH_AND_SUCROSE_METABOLISM	KEGG_STARCH_AND_SUCROSE_METABOLISM	1	1	387	52	0
KEGG_T_CELL_RECEPTOR_SIGNALING_PATHWAY	KEGG_T_CELL_RECEPTOR_SIGNALING_PATHWAY	0.523679	1	387	106	1	NFATC2
KEGG_TASTE_TRANSDUCTION	KEGG_TASTE_TRANSDUCTION	1	1	387	50	0
KEGG_TAURINE_AND_HYPOTAURINE_METABOLISM	KEGG_TAURINE_AND_HYPOTAURINE_METABOLISM	1	1	387	10	0
KEGG_TOLL_LIKE_RECEPTOR_SIGNALING_PATHWAY	KEGG_TOLL_LIKE_RECEPTOR_SIGNALING_PATHWAY	1	1	387	101	0
KEGG_TRYPTOPHAN_METABOLISM	KEGG_TRYPTOPHAN_METABOLISM	1	1	387	39	0
KEGG_TYPE_II_DIABETES_MELLITUS	KEGG_TYPE_II_DIABETES_MELLITUS	1	1	387	46	0
KEGG_UBIQUITIN_MEDIATED_PROTEOLYSIS	KEGG_UBIQUITIN_MEDIATED_PROTEOLYSIS	0.597389	1	387	130	1	UBE2E3
KEGG_VALINE_LEUCINE_AND_ISOLEUCINE_BIOSYNTHESIS	KEGG_VALINE_LEUCINE_AND_ISOLEUCINE_BIOSYNTHESIS	1	1	387	11	0
KEGG_VALINE_LEUCINE_AND_ISOLEUCINE_DEGRADATION	KEGG_VALINE_LEUCINE_AND_ISOLEUCINE_DEGRADATION	1	1	387	44	0
KEGG_VIBRIO_CHOLERAE_INFECTION	KEGG_VIBRIO_CHOLERAE_INFECTION	1	1	387	53	0
KINASE_ACTIVATOR_ACTIVITY	KINASE_ACTIVATOR_ACTIVITY	1	1	387	12	0
KINASE_BINDING	KINASE_BINDING	1	1	387	70	0
KINETOCHORE	KINETOCHORE	1	1	387	24	0
L_AMINO_ACID_TRANSMEMBRANE_TRANSPORTER_ACTIVITY	L_AMINO_ACID_TRANSMEMBRANE_TRANSPORTER_ACTIVITY	1	1	387	17	0
LAMELLIPODIUM	LAMELLIPODIUM	1	1	387	25	0
LATE_ENDOSOME	LATE_ENDOSOME	1	1	387	11	0
LEADING_EDGE	LEADING_EDGE	1	1	387	47	0
LEUKOCYTE_CHEMOTAXIS	LEUKOCYTE_CHEMOTAXIS	1	1	387	12	0
LEUKOCYTE_MIGRATION	LEUKOCYTE_MIGRATION	1	1	387	15	0
LIGAND_GATED_CHANNEL_ACTIVITY	LIGAND_GATED_CHANNEL_ACTIVITY	1	1	387	39	0
LIGASE_ACTIVITY	LIGASE_ACTIVITY	1	1	387	94	0
LIGASE_ACTIVITY_FORMING_CARBON_NITROGEN_BONDS	LIGASE_ACTIVITY_FORMING_CARBON_NITROGEN_BONDS	1	1	387	66	0
LIGASE_ACTIVITY_FORMING_CARBON_OXYGEN_BONDS	LIGASE_ACTIVITY_FORMING_CARBON_OXYGEN_BONDS	1	1	387	14	0
LIPID_BIOSYNTHETIC_PROCESS	LIPID_BIOSYNTHETIC_PROCESS	1	1	387	95	0
LIPID_CATABOLIC_PROCESS	LIPID_CATABOLIC_PROCESS	1	1	387	38	0
LIPID_TRANSPORTER_ACTIVITY	LIPID_TRANSPORTER_ACTIVITY	1	1	387	28	0
LIPOPROTEIN_BIOSYNTHETIC_PROCESS	LIPOPROTEIN_BIOSYNTHETIC_PROCESS	1	1	387	26	0
LIPOPROTEIN_METABOLIC_PROCESS	LIPOPROTEIN_METABOLIC_PROCESS	1	1	387	33	0
LYSOSOMAL_TRANSPORT	LYSOSOMAL_TRANSPORT	1	1	387	10	0
LYSOSOME_ORGANIZATION_AND_BIOGENESIS	LYSOSOME_ORGANIZATION_AND_BIOGENESIS	1	1	387	11	0
M_PHASE	M_PHASE	1	1	387	112	0
M_PHASE_OF_MITOTIC_CELL_CYCLE	M_PHASE_OF_MITOTIC_CELL_CYCLE	1	1	387	85	0
MACROMOLECULAR_COMPLEX_DISASSEMBLY	MACROMOLECULAR_COMPLEX_DISASSEMBLY	1	1	387	13	0
MACROMOLECULE_CATABOLIC_PROCESS	MACROMOLECULE_CATABOLIC_PROCESS	1	1	387	133	0
MALE_GONAD_DEVELOPMENT	MALE_GONAD_DEVELOPMENT	1	1	387	12	0
MANNOSYLTRANSFERASE_ACTIVITY	MANNOSYLTRANSFERASE_ACTIVITY	1	1	387	10	0
MAP_KINASE_ACTIVITY	MAP_KINASE_ACTIVITY	1	1	387	12	0
MEDIATOR_COMPLEX	MEDIATOR_COMPLEX	1	1	387	18	0
MEIOSIS_I	MEIOSIS_I	1	1	387	18	0
MEIOTIC_CELL_CYCLE	MEIOTIC_CELL_CYCLE	1	1	387	33	0
MEIOTIC_RECOMBINATION	MEIOTIC_RECOMBINATION	1	1	387	16	0
MEMBRANE_FUSION	MEMBRANE_FUSION	1	1	387	28	0
MEMBRANE_LIPID_BIOSYNTHETIC_PROCESS	MEMBRANE_LIPID_BIOSYNTHETIC_PROCESS	1	1	387	48	0
MEMBRANE_LIPID_METABOLIC_PROCESS	MEMBRANE_LIPID_METABOLIC_PROCESS	0.503238	1	387	100	1	SPHK1
MESODERM_DEVELOPMENT	MESODERM_DEVELOPMENT	1	1	387	21	0
METABOTROPIC_GLUTAMATEGABA_B_LIKE_RECEPTOR_ACTIVITY	METABOTROPIC_GLUTAMATEGABA_B_LIKE_RECEPTOR_ACTIVITY	1	1	387	10	0
METAL_ION_TRANSMEMBRANE_TRANSPORTER_ACTIVITY	METAL_ION_TRANSMEMBRANE_TRANSPORTER_ACTIVITY	1	1	387	145	0
METALLOENDOPEPTIDASE_ACTIVITY	METALLOENDOPEPTIDASE_ACTIVITY	1	1	387	27	0
METHYLTRANSFERASE_ACTIVITY	METHYLTRANSFERASE_ACTIVITY	1	1	387	35	0
MICROBODY	MICROBODY	1	1	387	47	0
MICROBODY_MEMBRANE	MICROBODY_MEMBRANE	1	1	387	13	0
MICROBODY_PART	MICROBODY_PART	1	1	387	14	0
MICROTUBULE_BASED_MOVEMENT	MICROTUBULE_BASED_MOVEMENT	1	1	387	16	0
MICROTUBULE_BINDING	MICROTUBULE_BINDING	1	1	387	33	0
MICROTUBULE_CYTOSKELETON_ORGANIZATION_AND_BIOGENESIS	MICROTUBULE_CYTOSKELETON_ORGANIZATION_AND_BIOGENESIS	1	1	387	35	0
MICROTUBULE_ORGANIZING_CENTER_ORGANIZATION_AND_BIOGENESIS	MICROTUBULE_ORGANIZING_CENTER_ORGANIZATION_AND_BIOGENESIS	1	1	387	16	0
MICROTUBULE_ORGANIZING_CENTER_PART	MICROTUBULE_ORGANIZING_CENTER_PART	1	1	387	19	0
MICROTUBULE_POLYMERIZATION_OR_DEPOLYMERIZATION	MICROTUBULE_POLYMERIZATION_OR_DEPOLYMERIZATION	1	1	387	11	0
MICROVILLUS	MICROVILLUS	1	1	387	10	0
MITOCHONDRIAL_ENVELOPE	MITOCHONDRIAL_ENVELOPE	1	1	387	85	0
MITOCHONDRIAL_INNER_MEMBRANE	MITOCHONDRIAL_INNER_MEMBRANE	1	1	387	56	0
MITOCHONDRIAL_LUMEN	MITOCHONDRIAL_LUMEN	1	1	387	44	0
MITOCHONDRIAL_MATRIX	MITOCHONDRIAL_MATRIX	1	1	387	44	0
MITOCHONDRIAL_MEMBRANE	MITOCHONDRIAL_MEMBRANE	1	1	387	75	0
MITOCHONDRIAL_MEMBRANE_PART	MITOCHONDRIAL_MEMBRANE_PART	1	1	387	43	0
MITOCHONDRIAL_OUTER_MEMBRANE	MITOCHONDRIAL_OUTER_MEMBRANE	1	1	387	18	0
MITOCHONDRIAL_PART	MITOCHONDRIAL_PART	1	1	387	128	0
MITOCHONDRIAL_RESPIRATORY_CHAIN	MITOCHONDRIAL_RESPIRATORY_CHAIN	1	1	387	23	0
MITOCHONDRIAL_RESPIRATORY_CHAIN_COMPLEX_I	MITOCHONDRIAL_RESPIRATORY_CHAIN_COMPLEX_I	1	1	387	14	0
MITOCHONDRIAL_RIBOSOME	MITOCHONDRIAL_RIBOSOME	1	1	387	22	0
MITOCHONDRIAL_SMALL_RIBOSOMAL_SUBUNIT	MITOCHONDRIAL_SMALL_RIBOSOMAL_SUBUNIT	1	1	387	11	0
MITOSIS	MITOSIS	1	1	387	82	0
MITOTIC_CELL_CYCLE_CHECKPOINT	MITOTIC_CELL_CYCLE_CHECKPOINT	1	1	387	21	0
MITOTIC_SISTER_CHROMATID_SEGREGATION	MITOTIC_SISTER_CHROMATID_SEGREGATION	1	1	387	16	0
MITOTIC_SPINDLE_ORGANIZATION_AND_BIOGENESIS	MITOTIC_SPINDLE_ORGANIZATION_AND_BIOGENESIS	1	1	387	10	0
MONOCARBOXYLIC_ACID_METABOLIC_PROCESS	MONOCARBOXYLIC_ACID_METABOLIC_PROCESS	1	1	387	87	0
MONOCARBOXYLIC_ACID_TRANSMEMBRANE_TRANSPORTER_ACTIVITY	MONOCARBOXYLIC_ACID_TRANSMEMBRANE_TRANSPORTER_ACTIVITY	1	1	387	11	0
MONOCARBOXYLIC_ACID_TRANSPORT	MONOCARBOXYLIC_ACID_TRANSPORT	1	1	387	10	0
MONOOXYGENASE_ACTIVITY	MONOOXYGENASE_ACTIVITY	1	1	387	30	0
MONOSACCHARIDE_BINDING	MONOSACCHARIDE_BINDING	1	1	387	11	0
MONOSACCHARIDE_TRANSMEMBRANE_TRANSPORTER_ACTIVITY	MONOSACCHARIDE_TRANSMEMBRANE_TRANSPORTER_ACTIVITY	1	1	387	10	0
MONOVALENT_INORGANIC_CATION_HOMEOSTASIS	MONOVALENT_INORGANIC_CATION_HOMEOSTASIS	1	1	387	14	0
MONOVALENT_INORGANIC_CATION_TRANSMEMBRANE_TRANSPORTER_ACTIVITY	MONOVALENT_INORGANIC_CATION_TRANSMEMBRANE_TRANSPORTER_ACTIVITY	1	1	387	33	0
MRNA_BINDING	MRNA_BINDING	1	1	387	22	0
MRNA_METABOLIC_PROCESS	MRNA_METABOLIC_PROCESS	1	1	387	84	0
MRNA_PROCESSING_GO_0006397	MRNA_PROCESSING_GO_0006397	1	1	387	73	0
MRNA_SPLICE_SITE_SELECTION	MRNA_SPLICE_SITE_SELECTION	1	1	387	13	0
MUSCLE_CELL_DIFFERENTIATION	MUSCLE_CELL_DIFFERENTIATION	1	1	387	22	0
MUSCLE_DEVELOPMENT	MUSCLE_DEVELOPMENT	0.467208	1	387	90	1	MKX
MYELOID_LEUKOCYTE_DIFFERENTIATION	MYELOID_LEUKOCYTE_DIFFERENTIATION	1	1	387	14	0
MYOBLAST_DIFFERENTIATION	MYOBLAST_DIFFERENTIATION	1	1	387	17	0
MYOFIBRIL	MYOFIBRIL	1	1	387	19	0
N_ACETYLGLUCOSAMINE_METABOLIC_PROCESS	N_ACETYLGLUCOSAMINE_METABOLIC_PROCESS	1	1	387	11	0
N_ACETYLTRANSFERASE_ACTIVITY	N_ACETYLTRANSFERASE_ACTIVITY	1	1	387	21	0
N_ACYLTRANSFERASE_ACTIVITY	N_ACYLTRANSFERASE_ACTIVITY	1	1	387	24	0
N_METHYLTRANSFERASE_ACTIVITY	N_METHYLTRANSFERASE_ACTIVITY	1	1	387	12	0
NADH_DEHYDROGENASE_COMPLEX	NADH_DEHYDROGENASE_COMPLEX	1	1	387	14	0
NEGATIVE_REGULATION_OF_BINDING	NEGATIVE_REGULATION_OF_BINDING	1	1	387	18	0
NEGATIVE_REGULATION_OF_BIOSYNTHETIC_PROCESS	NEGATIVE_REGULATION_OF_BIOSYNTHETIC_PROCESS	1	1	387	30	0
NEGATIVE_REGULATION_OF_CELL_MIGRATION	NEGATIVE_REGULATION_OF_CELL_MIGRATION	1	1	387	15	0
NEGATIVE_REGULATION_OF_CELLULAR_BIOSYNTHETIC_PROCESS	NEGATIVE_REGULATION_OF_CELLULAR_BIOSYNTHETIC_PROCESS	1	1	387	29	0
NEGATIVE_REGULATION_OF_CYTOKINE_BIOSYNTHETIC_PROCESS	NEGATIVE_REGULATION_OF_CYTOKINE_BIOSYNTHETIC_PROCESS	1	1	387	12	0
NEGATIVE_REGULATION_OF_DNA_BINDING	NEGATIVE_REGULATION_OF_DNA_BINDING	1	1	387	17	0
NEGATIVE_REGULATION_OF_DNA_METABOLIC_PROCESS	NEGATIVE_REGULATION_OF_DNA_METABOLIC_PROCESS	1	1	387	18	0
NEGATIVE_REGULATION_OF_DNA_REPLICATION	NEGATIVE_REGULATION_OF_DNA_REPLICATION	1	1	387	13	0
NEGATIVE_REGULATION_OF_INTRACELLULAR_TRANSPORT	NEGATIVE_REGULATION_OF_INTRACELLULAR_TRANSPORT	1	1	387	11	0
NEGATIVE_REGULATION_OF_MAP_KINASE_ACTIVITY	NEGATIVE_REGULATION_OF_MAP_KINASE_ACTIVITY	1	1	387	17	0
NEGATIVE_REGULATION_OF_MYELOID_CELL_DIFFERENTIATION	NEGATIVE_REGULATION_OF_MYELOID_CELL_DIFFERENTIATION	1	1	387	10	0
NEGATIVE_REGULATION_OF_PHOSPHATE_METABOLIC_PROCESS	NEGATIVE_REGULATION_OF_PHOSPHATE_METABOLIC_PROCESS	1	1	387	12	0
NEGATIVE_REGULATION_OF_PHOSPHORYLATION	NEGATIVE_REGULATION_OF_PHOSPHORYLATION	1	1	387	12	0
NEGATIVE_REGULATION_OF_TRANSCRIPTION_FACTOR_ACTIVITY	NEGATIVE_REGULATION_OF_TRANSCRIPTION_FACTOR_ACTIVITY	1	1	387	15	0
NEGATIVE_REGULATION_OF_TRANSCRIPTION_FROM_RNA_POLYMERASE_II_PROMOTER	NEGATIVE_REGULATION_OF_TRANSCRIPTION_FROM_RNA_POLYMERASE_II_PROMOTER	0.432557	1	387	81	1	NR6A1
NEGATIVE_REGULATION_OF_TRANSLATION	NEGATIVE_REGULATION_OF_TRANSLATION	1	1	387	23	0
NEGATIVE_REGULATION_OF_TRANSPORT	NEGATIVE_REGULATION_OF_TRANSPORT	1	1	387	20	0
NEURON_APOPTOSIS	NEURON_APOPTOSIS	1	1	387	17	0
NEURON_PROJECTION	NEURON_PROJECTION	1	1	387	21	0
NEUROPEPTIDE_BINDING	NEUROPEPTIDE_BINDING	1	1	387	23	0
NEUROPEPTIDE_HORMONE_ACTIVITY	NEUROPEPTIDE_HORMONE_ACTIVITY	1	1	387	12	0
NEUROPEPTIDE_RECEPTOR_ACTIVITY	NEUROPEPTIDE_RECEPTOR_ACTIVITY	1	1	387	22	0
NEUROPEPTIDE_SIGNALING_PATHWAY	NEUROPEPTIDE_SIGNALING_PATHWAY	1	1	387	14	0
NEUROTRANSMITTER_BINDING	NEUROTRANSMITTER_BINDING	1	1	387	53	0
NEUROTRANSMITTER_RECEPTOR_ACTIVITY	NEUROTRANSMITTER_RECEPTOR_ACTIVITY	1	1	387	50	0
NEUROTRANSMITTER_SECRETION	NEUROTRANSMITTER_SECRETION	1	1	387	13	0
NEUTRAL_AMINO_ACID_TRANSMEMBRANE_TRANSPORTER_ACTIVITY	NEUTRAL_AMINO_ACID_TRANSMEMBRANE_TRANSPORTER_ACTIVITY	1	1	387	12	0
NEUTRAL_AMINO_ACID_TRANSPORT	NEUTRAL_AMINO_ACID_TRANSPORT	1	1	387	10	0
NF_KAPPAB_BINDING	NF_KAPPAB_BINDING	1	1	387	11	0
NICOTINIC_ACETYLCHOLINE_ACTIVATED_CATION_SELECTIVE_CHANNEL_ACTIVITY	NICOTINIC_ACETYLCHOLINE_ACTIVATED_CATION_SELECTIVE_CHANNEL_ACTIVITY	1	1	387	11	0
NICOTINIC_ACETYLCHOLINE_GATED_RECEPTOR_CHANNEL_COMPLEX	NICOTINIC_ACETYLCHOLINE_GATED_RECEPTOR_CHANNEL_COMPLEX	1	1	387	11	0
NITROGEN_COMPOUND_CATABOLIC_PROCESS	NITROGEN_COMPOUND_CATABOLIC_PROCESS	1	1	387	29	0
NLS_BEARING_SUBSTRATE_IMPORT_INTO_NUCLEUS	NLS_BEARING_SUBSTRATE_IMPORT_INTO_NUCLEUS	1	1	387	12	0
NON_MEMBRANE_SPANNING_PROTEIN_TYROSINE_KINASE_ACTIVITY	NON_MEMBRANE_SPANNING_PROTEIN_TYROSINE_KINASE_ACTIVITY	1	1	387	11	0
NUCLEAR_BODY	NUCLEAR_BODY	1	1	387	32	0
NUCLEAR_CHROMATIN	NUCLEAR_CHROMATIN	1	1	387	14	0
NUCLEAR_CHROMOSOME	NUCLEAR_CHROMOSOME	1	1	387	51	0
NUCLEAR_CHROMOSOME_PART	NUCLEAR_CHROMOSOME_PART	1	1	387	33	0
NUCLEAR_DNA_DIRECTED_RNA_POLYMERASE_COMPLEX	NUCLEAR_DNA_DIRECTED_RNA_POLYMERASE_COMPLEX	1	1	387	17	0
NUCLEAR_ENVELOPE_ENDOPLASMIC_RETICULUM_NETWORK	NUCLEAR_ENVELOPE_ENDOPLASMIC_RETICULUM_NETWORK	0.474617	1	387	92	1	SPINK5
NUCLEAR_EXPORT	NUCLEAR_EXPORT	1	1	387	33	0
NUCLEAR_HORMONE_RECEPTOR_BINDING	NUCLEAR_HORMONE_RECEPTOR_BINDING	1	1	387	28	0
NUCLEAR_MEMBRANE	NUCLEAR_MEMBRANE	1	1	387	49	0
NUCLEAR_MEMBRANE_PART	NUCLEAR_MEMBRANE_PART	1	1	387	41	0
NUCLEAR_ORGANIZATION_AND_BIOGENESIS	NUCLEAR_ORGANIZATION_AND_BIOGENESIS	1	1	387	29	0
NUCLEAR_PORE	NUCLEAR_PORE	1	1	387	30	0
NUCLEAR_REPLICATION_FORK	NUCLEAR_REPLICATION_FORK	1	1	387	10	0
NUCLEAR_SPECK	NUCLEAR_SPECK	1	1	387	10	0
NUCLEAR_TRANSPORT	NUCLEAR_TRANSPORT	0.455899	1	387	87	1	CDH1
NUCLEAR_UBIQUITIN_LIGASE_COMPLEX	NUCLEAR_UBIQUITIN_LIGASE_COMPLEX	1	1	387	10	0
NUCLEOBASENUCLEOSIDE_AND_NUCLEOTIDE_METABOLIC_PROCESS	NUCLEOBASENUCLEOSIDE_AND_NUCLEOTIDE_METABOLIC_PROCESS	1	1	387	50	0
NUCLEOBASENUCLEOSIDENUCLEOTIDE_AND_NUCLEIC_ACID_TRANSMEMBRANE_TRANSPORTER_ACTIVITY	NUCLEOBASENUCLEOSIDENUCLEOTIDE_AND_NUCLEIC_ACID_TRANSMEMBRANE_TRANSPORTER_ACTIVITY	1	1	387	10	0
NUCLEOBASENUCLEOSIDENUCLEOTIDE_AND_NUCLEIC_ACID_TRANSPORT	NUCLEOBASENUCLEOSIDENUCLEOTIDE_AND_NUCLEIC_ACID_TRANSPORT	1	1	387	31	0
NUCLEOBASENUCLEOSIDENUCLEOTIDE_KINASE_ACTIVITY	NUCLEOBASENUCLEOSIDENUCLEOTIDE_KINASE_ACTIVITY	1	1	387	25	0
NUCLEOCYTOPLASMIC_TRANSPORT	NUCLEOCYTOPLASMIC_TRANSPORT	0.452076	1	387	86	1	CDH1
NUCLEOLAR_PART	NUCLEOLAR_PART	1	1	387	18	0
NUCLEOLUS	NUCLEOLUS	0.562079	1	387	118	1	TP53
NUCLEOTIDE_BIOSYNTHETIC_PROCESS	NUCLEOTIDE_BIOSYNTHETIC_PROCESS	1	1	387	18	0
NUCLEOTIDE_KINASE_ACTIVITY	NUCLEOTIDE_KINASE_ACTIVITY	1	1	387	13	0
NUCLEOTIDE_METABOLIC_PROCESS	NUCLEOTIDE_METABOLIC_PROCESS	1	1	387	40	0
NUCLEOTIDE_SUGAR_METABOLIC_PROCESS	NUCLEOTIDE_SUGAR_METABOLIC_PROCESS	1	1	387	10	0
NUCLEOTIDYLTRANSFERASE_ACTIVITY	NUCLEOTIDYLTRANSFERASE_ACTIVITY	1	1	387	47	0
OLIGOSACCHARIDE_METABOLIC_PROCESS	OLIGOSACCHARIDE_METABOLIC_PROCESS	1	1	387	11	0
OLIGOSACCHARYL_TRANSFERASE_COMPLEX	OLIGOSACCHARYL_TRANSFERASE_COMPLEX	1	1	387	10	0
ONE_CARBON_COMPOUND_METABOLIC_PROCESS	ONE_CARBON_COMPOUND_METABOLIC_PROCESS	1	1	387	25	0
ORGANELLAR_RIBOSOME	ORGANELLAR_RIBOSOME	1	1	387	22	0
ORGANELLAR_SMALL_RIBOSOMAL_SUBUNIT	ORGANELLAR_SMALL_RIBOSOMAL_SUBUNIT	1	1	387	11	0
ORGANELLE_ENVELOPE	ORGANELLE_ENVELOPE	0.664455	1	387	156	1	PTGER3
ORGANELLE_INNER_MEMBRANE	ORGANELLE_INNER_MEMBRANE	1	1	387	64	0
ORGANELLE_LOCALIZATION	ORGANELLE_LOCALIZATION	1	1	387	25	0
ORGANELLE_OUTER_MEMBRANE	ORGANELLE_OUTER_MEMBRANE	1	1	387	24	0
ORGANIC_ACID_METABOLIC_PROCESS	ORGANIC_ACID_METABOLIC_PROCESS	0.714428	1	387	179	1	SLC6A14
ORGANIC_ACID_TRANSPORT	ORGANIC_ACID_TRANSPORT	1	1	387	42	0
ORGANIC_ANION_TRANSMEMBRANE_TRANSPORTER_ACTIVITY	ORGANIC_ANION_TRANSMEMBRANE_TRANSPORTER_ACTIVITY	1	1	387	10	0
OUTER_MEMBRANE	OUTER_MEMBRANE	1	1	387	25	0
OVULATION_CYCLE	OVULATION_CYCLE	1	1	387	14	0
OXIDOREDUCTASE_ACTIVITY_ACTING_ON_NADH_OR_NADPH	OXIDOREDUCTASE_ACTIVITY_ACTING_ON_NADH_OR_NADPH	1	1	387	25	0
OXIDOREDUCTASE_ACTIVITY_ACTING_ON_PEROXIDE_AS_ACCEPTOR	OXIDOREDUCTASE_ACTIVITY_ACTING_ON_PEROXIDE_AS_ACCEPTOR	1	1	387	12	0
OXIDOREDUCTASE_ACTIVITY_ACTING_ON_THE_CH_CH_GROUP_OF_DONORS	OXIDOREDUCTASE_ACTIVITY_ACTING_ON_THE_CH_CH_GROUP_OF_DONORS	1	1	387	23	0
OXIDOREDUCTASE_ACTIVITY_ACTING_ON_THE_CH_NH_GROUP_OF_DONORS	OXIDOREDUCTASE_ACTIVITY_ACTING_ON_THE_CH_NH_GROUP_OF_DONORS	1	1	387	10	0
OXYGEN_AND_REACTIVE_OXYGEN_SPECIES_METABOLIC_PROCESS	OXYGEN_AND_REACTIVE_OXYGEN_SPECIES_METABOLIC_PROCESS	1	1	387	20	0
OXYGEN_BINDING	OXYGEN_BINDING	1	1	387	22	0
PATTERN_RECOGNITION_RECEPTOR_ACTIVITY	PATTERN_RECOGNITION_RECEPTOR_ACTIVITY	1	1	387	10	0
PDZ_DOMAIN_BINDING	PDZ_DOMAIN_BINDING	1	1	387	14	0
PEPTIDE_METABOLIC_PROCESS	PEPTIDE_METABOLIC_PROCESS	1	1	387	9	0
PERIPHERAL_NERVOUS_SYSTEM_DEVELOPMENT	PERIPHERAL_NERVOUS_SYSTEM_DEVELOPMENT	1	1	387	10	0
PEROXISOMAL_MEMBRANE	PEROXISOMAL_MEMBRANE	1	1	387	13	0
PEROXISOMAL_PART	PEROXISOMAL_PART	1	1	387	14	0
PEROXISOME	PEROXISOME	1	1	387	47	0
PEROXISOME_ORGANIZATION_AND_BIOGENESIS	PEROXISOME_ORGANIZATION_AND_BIOGENESIS	1	1	387	16	0
PHAGOCYTOSIS	PHAGOCYTOSIS	1	1	387	17	0
PHOSPHATASE_BINDING	PHOSPHATASE_BINDING	1	1	387	12	0
PHOSPHATASE_INHIBITOR_ACTIVITY	PHOSPHATASE_INHIBITOR_ACTIVITY	1	1	387	11	0
PHOSPHATASE_REGULATOR_ACTIVITY	PHOSPHATASE_REGULATOR_ACTIVITY	1	1	387	25	0
PHOSPHATE_TRANSMEMBRANE_TRANSPORTER_ACTIVITY	PHOSPHATE_TRANSMEMBRANE_TRANSPORTER_ACTIVITY	1	1	387	13	0
PHOSPHOINOSITIDE_BIOSYNTHETIC_PROCESS	PHOSPHOINOSITIDE_BIOSYNTHETIC_PROCESS	1	1	387	24	0
PHOSPHOINOSITIDE_METABOLIC_PROCESS	PHOSPHOINOSITIDE_METABOLIC_PROCESS	1	1	387	31	0
PHOSPHOLIPASE_A2_ACTIVITY	PHOSPHOLIPASE_A2_ACTIVITY	1	1	387	13	0
PHOSPHOLIPASE_C_ACTIVITY	PHOSPHOLIPASE_C_ACTIVITY	1	1	387	15	0
PHOSPHOLIPID_BIOSYNTHETIC_PROCESS	PHOSPHOLIPID_BIOSYNTHETIC_PROCESS	1	1	387	39	0
PHOSPHOLIPID_METABOLIC_PROCESS	PHOSPHOLIPID_METABOLIC_PROCESS	1	1	387	74	0
PHOSPHOLIPID_TRANSPORTER_ACTIVITY	PHOSPHOLIPID_TRANSPORTER_ACTIVITY	1	1	387	12	0
PHOSPHOPROTEIN_PHOSPHATASE_ACTIVITY	PHOSPHOPROTEIN_PHOSPHATASE_ACTIVITY	0.420514	1	387	78	1	TPTE
PHOSPHORIC_MONOESTER_HYDROLASE_ACTIVITY	PHOSPHORIC_MONOESTER_HYDROLASE_ACTIVITY	0.527004	1	387	107	1	TPTE
PHOSPHORUS_OXYGEN_LYASE_ACTIVITY	PHOSPHORUS_OXYGEN_LYASE_ACTIVITY	1	1	387	8	0
PHOSPHOTRANSFERASE_ACTIVITY_PHOSPHATE_GROUP_AS_ACCEPTOR	PHOSPHOTRANSFERASE_ACTIVITY_PHOSPHATE_GROUP_AS_ACCEPTOR	1	1	387	18	0
PHOTORECEPTOR_CELL_MAINTENANCE	PHOTORECEPTOR_CELL_MAINTENANCE	1	1	387	9	0
PHOTOTRANSDUCTION	PHOTOTRANSDUCTION	1	1	387	13	0
PIGMENT_BIOSYNTHETIC_PROCESS	PIGMENT_BIOSYNTHETIC_PROCESS	1	1	387	17	0
PIGMENT_METABOLIC_PROCESS	PIGMENT_METABOLIC_PROCESS	1	1	387	18	0
PML_BODY	PML_BODY	1	1	387	14	0
POLYSACCHARIDE_METABOLIC_PROCESS	POLYSACCHARIDE_METABOLIC_PROCESS	1	1	387	18	0
PORE_COMPLEX	PORE_COMPLEX	1	1	387	35	0
POSITIVE_REGULATION_OF_BINDING	POSITIVE_REGULATION_OF_BINDING	1	1	387	28	0
POSITIVE_REGULATION_OF_CELL_ADHESION	POSITIVE_REGULATION_OF_CELL_ADHESION	1	1	387	13	0
POSITIVE_REGULATION_OF_CELLULAR_COMPONENT_ORGANIZATION_AND_BIOGENESIS	POSITIVE_REGULATION_OF_CELLULAR_COMPONENT_ORGANIZATION_AND_BIOGENESIS	1	1	387	36	0
POSITIVE_REGULATION_OF_CYTOKINE_BIOSYNTHETIC_PROCESS	POSITIVE_REGULATION_OF_CYTOKINE_BIOSYNTHETIC_PROCESS	1	1	387	25	0
POSITIVE_REGULATION_OF_CYTOKINE_PRODUCTION	POSITIVE_REGULATION_OF_CYTOKINE_PRODUCTION	1	1	387	15	0
POSITIVE_REGULATION_OF_CYTOKINE_SECRETION	POSITIVE_REGULATION_OF_CYTOKINE_SECRETION	1	1	387	10	0
POSITIVE_REGULATION_OF_CYTOSKELETON_ORGANIZATION_AND_BIOGENESIS	POSITIVE_REGULATION_OF_CYTOSKELETON_ORGANIZATION_AND_BIOGENESIS	1	1	387	10	0
POSITIVE_REGULATION_OF_DEFENSE_RESPONSE	POSITIVE_REGULATION_OF_DEFENSE_RESPONSE	1	1	387	10	0
POSITIVE_REGULATION_OF_DNA_BINDING	POSITIVE_REGULATION_OF_DNA_BINDING	1	1	387	26	0
POSITIVE_REGULATION_OF_DNA_METABOLIC_PROCESS	POSITIVE_REGULATION_OF_DNA_METABOLIC_PROCESS	1	1	387	11	0
POSITIVE_REGULATION_OF_I_KAPPAB_KINASE_NF_KAPPAB_CASCADE	POSITIVE_REGULATION_OF_I_KAPPAB_KINASE_NF_KAPPAB_CASCADE	0.455899	1	387	87	1	WLS
POSITIVE_REGULATION_OF_IMMUNE_RESPONSE	POSITIVE_REGULATION_OF_IMMUNE_RESPONSE	1	1	387	28	0
POSITIVE_REGULATION_OF_IMMUNE_SYSTEM_PROCESS	POSITIVE_REGULATION_OF_IMMUNE_SYSTEM_PROCESS	1	1	387	50	0
POSITIVE_REGULATION_OF_LYMPHOCYTE_ACTIVATION	POSITIVE_REGULATION_OF_LYMPHOCYTE_ACTIVATION	1	1	387	24	0
POSITIVE_REGULATION_OF_MAPKKK_CASCADE	POSITIVE_REGULATION_OF_MAPKKK_CASCADE	1	1	387	11	0
POSITIVE_REGULATION_OF_PROTEIN_SECRETION	POSITIVE_REGULATION_OF_PROTEIN_SECRETION	1	1	387	12	0
POSITIVE_REGULATION_OF_RESPONSE_TO_STIMULUS	POSITIVE_REGULATION_OF_RESPONSE_TO_STIMULUS	1	1	387	39	0
POSITIVE_REGULATION_OF_T_CELL_ACTIVATION	POSITIVE_REGULATION_OF_T_CELL_ACTIVATION	1	1	387	21	0
POSITIVE_REGULATION_OF_T_CELL_PROLIFERATION	POSITIVE_REGULATION_OF_T_CELL_PROLIFERATION	1	1	387	13	0
POSITIVE_REGULATION_OF_TRANSCRIPTION_FACTOR_ACTIVITY	POSITIVE_REGULATION_OF_TRANSCRIPTION_FACTOR_ACTIVITY	1	1	387	24	0
POST_GOLGI_VESICLE_MEDIATED_TRANSPORT	POST_GOLGI_VESICLE_MEDIATED_TRANSPORT	1	1	387	14	0
POTASSIUM_CHANNEL_ACTIVITY	POTASSIUM_CHANNEL_ACTIVITY	1	1	387	50	0
POTASSIUM_CHANNEL_REGULATOR_ACTIVITY	POTASSIUM_CHANNEL_REGULATOR_ACTIVITY	1	1	387	13	0
PRODUCTION_OF_MOLECULAR_MEDIATOR_OF_IMMUNE_RESPONSE	PRODUCTION_OF_MOLECULAR_MEDIATOR_OF_IMMUNE_RESPONSE	1	1	387	13	0
PROTEASOME_COMPLEX	PROTEASOME_COMPLEX	1	1	387	21	0
PROTEIN_AMINO_ACID_ADP_RIBOSYLATION	PROTEIN_AMINO_ACID_ADP_RIBOSYLATION	1	1	387	10	0
PROTEIN_AMINO_ACID_LIPIDATION	PROTEIN_AMINO_ACID_LIPIDATION	1	1	387	24	0
PROTEIN_AMINO_ACID_O_LINKED_GLYCOSYLATION	PROTEIN_AMINO_ACID_O_LINKED_GLYCOSYLATION	1	1	387	18	0
PROTEIN_C_TERMINUS_BINDING	PROTEIN_C_TERMINUS_BINDING	1	1	387	70	0
PROTEIN_CATABOLIC_PROCESS	PROTEIN_CATABOLIC_PROCESS	1	1	387	65	0
PROTEIN_COMPLEX_DISASSEMBLY	PROTEIN_COMPLEX_DISASSEMBLY	1	1	387	12	0
PROTEIN_DEACETYLASE_ACTIVITY	PROTEIN_DEACETYLASE_ACTIVITY	1	1	387	10	0
PROTEIN_EXPORT_FROM_NUCLEUS	PROTEIN_EXPORT_FROM_NUCLEUS	1	1	387	12	0
PROTEIN_IMPORT_INTO_NUCLEUS_TRANSLOCATION	PROTEIN_IMPORT_INTO_NUCLEUS_TRANSLOCATION	1	1	387	11	0
PROTEIN_KINASE_BINDING	PROTEIN_KINASE_BINDING	1	1	387	62	0
PROTEIN_MATURATION	PROTEIN_MATURATION	1	1	387	11	0
PROTEIN_METHYLTRANSFERASE_ACTIVITY	PROTEIN_METHYLTRANSFERASE_ACTIVITY	1	1	387	13	0
PROTEIN_MODIFICATION_BY_SMALL_PROTEIN_CONJUGATION	PROTEIN_MODIFICATION_BY_SMALL_PROTEIN_CONJUGATION	1	1	387	42	0
PROTEIN_PHOSPHATASE_BINDING	PROTEIN_PHOSPHATASE_BINDING	1	1	387	9	0
PROTEIN_PHOSPHATASE_TYPE_2A_REGULATOR_ACTIVITY	PROTEIN_PHOSPHATASE_TYPE_2A_REGULATOR_ACTIVITY	1	1	387	13	0
PROTEIN_POLYUBIQUITINATION	PROTEIN_POLYUBIQUITINATION	1	1	387	11	0
PROTEIN_RNA_COMPLEX_ASSEMBLY	PROTEIN_RNA_COMPLEX_ASSEMBLY	1	1	387	66	0
PROTEIN_SECRETION	PROTEIN_SECRETION	1	1	387	32	0
PROTEIN_SERINE_THREONINE_PHOSPHATASE_ACTIVITY	PROTEIN_SERINE_THREONINE_PHOSPHATASE_ACTIVITY	1	1	387	24	0
PROTEIN_SERINE_THREONINE_PHOSPHATASE_COMPLEX	PROTEIN_SERINE_THREONINE_PHOSPHATASE_COMPLEX	1	1	387	9	0
PROTEIN_SERINE_THREONINE_TYROSINE_KINASE_ACTIVITY	PROTEIN_SERINE_THREONINE_TYROSINE_KINASE_ACTIVITY	1	1	387	10	0
PROTEIN_STABILIZATION	PROTEIN_STABILIZATION	1	1	387	11	0
PROTEIN_TARGETING	PROTEIN_TARGETING	0.530305	1	387	108	1	CDH1
PROTEIN_TARGETING_TO_MEMBRANE	PROTEIN_TARGETING_TO_MEMBRANE	1	1	387	12	0
PROTEIN_TARGETING_TO_MITOCHONDRION	PROTEIN_TARGETING_TO_MITOCHONDRION	1	1	387	11	0
PROTEIN_TRANSPORT	PROTEIN_TRANSPORT	0.659718	1	387	154	1	CDH1
PROTEIN_TRANSPORTER_ACTIVITY	PROTEIN_TRANSPORTER_ACTIVITY	1	1	387	14	0
PROTEIN_UBIQUITINATION	PROTEIN_UBIQUITINATION	1	1	387	39	0
PROTON_TRANSPORTING_TWO_SECTOR_ATPASE_COMPLEX	PROTON_TRANSPORTING_TWO_SECTOR_ATPASE_COMPLEX	1	1	387	6	0
PURINE_NUCLEOTIDE_METABOLIC_PROCESS	PURINE_NUCLEOTIDE_METABOLIC_PROCESS	1	1	387	11	0
PURINE_RIBONUCLEOTIDE_METABOLIC_PROCESS	PURINE_RIBONUCLEOTIDE_METABOLIC_PROCESS	1	1	387	9	0
PYRIMIDINE_NUCLEOTIDE_METABOLIC_PROCESS	PYRIMIDINE_NUCLEOTIDE_METABOLIC_PROCESS	1	1	387	9	0
RAS_GTPASE_BINDING	RAS_GTPASE_BINDING	1	1	387	25	0
RAS_GUANYL_NUCLEOTIDE_EXCHANGE_FACTOR_ACTIVITY	RAS_GUANYL_NUCLEOTIDE_EXCHANGE_FACTOR_ACTIVITY	1	1	387	19	0
REACTOME_3_UTR_MEDIATED_TRANSLATIONAL_REGULATION	REACTOME_3_UTR_MEDIATED_TRANSLATIONAL_REGULATION	0.616661	1	387	137	1	RPL10P9
REACTOME_ABC_FAMILY_PROTEINS_MEDIATED_TRANSPORT	REACTOME_ABC_FAMILY_PROTEINS_MEDIATED_TRANSPORT	1	1	387	34	0
REACTOME_ABCA_TRANSPORTERS_IN_LIPID_HOMEOSTASIS	REACTOME_ABCA_TRANSPORTERS_IN_LIPID_HOMEOSTASIS	1	1	387	18	0
REACTOME_ABORTIVE_ELONGATION_OF_HIV1_TRANSCRIPT_IN_THE_ABSENCE_OF_TAT	REACTOME_ABORTIVE_ELONGATION_OF_HIV1_TRANSCRIPT_IN_THE_ABSENCE_OF_TAT	1	1	387	19	0
REACTOME_ACETYLCHOLINE_BINDING_AND_DOWNSTREAM_EVENTS	REACTOME_ACETYLCHOLINE_BINDING_AND_DOWNSTREAM_EVENTS	1	1	387	15	0
REACTOME_ACETYLCHOLINE_NEUROTRANSMITTER_RELEASE_CYCLE	REACTOME_ACETYLCHOLINE_NEUROTRANSMITTER_RELEASE_CYCLE	1	1	387	10	0
REACTOME_ACTIVATED_AMPK_STIMULATES_FATTY_ACID_OXIDATION_IN_MUSCLE	REACTOME_ACTIVATED_AMPK_STIMULATES_FATTY_ACID_OXIDATION_IN_MUSCLE	1	1	387	18	0
REACTOME_ACTIVATED_POINT_MUTANTS_OF_FGFR2	REACTOME_ACTIVATED_POINT_MUTANTS_OF_FGFR2	1	1	387	16	0
REACTOME_ACTIVATED_TAK1_MEDIATES_P38_MAPK_ACTIVATION	REACTOME_ACTIVATED_TAK1_MEDIATES_P38_MAPK_ACTIVATION	1	1	387	17	0
REACTOME_ACTIVATED_TLR4_SIGNALLING	REACTOME_ACTIVATED_TLR4_SIGNALLING	1	1	387	92	0
REACTOME_ACTIVATION_OF_ATR_IN_RESPONSE_TO_REPLICATION_STRESS	REACTOME_ACTIVATION_OF_ATR_IN_RESPONSE_TO_REPLICATION_STRESS	1	1	387	35	0
REACTOME_ACTIVATION_OF_CHAPERONE_GENES_BY_ATF6_ALPHA	REACTOME_ACTIVATION_OF_CHAPERONE_GENES_BY_ATF6_ALPHA	1	1	387	10	0
REACTOME_ACTIVATION_OF_CHAPERONE_GENES_BY_XBP1S	REACTOME_ACTIVATION_OF_CHAPERONE_GENES_BY_XBP1S	1	1	387	44	0
REACTOME_ACTIVATION_OF_GENES_BY_ATF4	REACTOME_ACTIVATION_OF_GENES_BY_ATF4	1	1	387	24	0
REACTOME_ACTIVATION_OF_IRF3_IRF7_MEDIATED_BY_TBK1_IKK_EPSILON	REACTOME_ACTIVATION_OF_IRF3_IRF7_MEDIATED_BY_TBK1_IKK_EPSILON	1	1	387	14	0
REACTOME_ACTIVATION_OF_NF_KAPPAB_IN_B_CELLS	REACTOME_ACTIVATION_OF_NF_KAPPAB_IN_B_CELLS	1	1	387	62	0
REACTOME_ACTIVATION_OF_NMDA_RECEPTOR_UPON_GLUTAMATE_BINDING_AND_POSTSYNAPTIC_EVENTS	REACTOME_ACTIVATION_OF_NMDA_RECEPTOR_UPON_GLUTAMATE_BINDING_AND_POSTSYNAPTIC_EVENTS	1	1	387	37	0
REACTOME_ACTIVATION_OF_RAC	REACTOME_ACTIVATION_OF_RAC	1	1	387	12	0
REACTOME_ACTIVATION_OF_THE_AP1_FAMILY_OF_TRANSCRIPTION_FACTORS	REACTOME_ACTIVATION_OF_THE_AP1_FAMILY_OF_TRANSCRIPTION_FACTORS	1	1	387	10	0
REACTOME_ACTIVATION_OF_THE_MRNA_UPON_BINDING_OF_THE_CAP_BINDING_COMPLEX_AND_EIFS_AND_SUBSEQUENT_BINDING_TO_43S	REACTOME_ACTIVATION_OF_THE_MRNA_UPON_BINDING_OF_THE_CAP_BINDING_COMPLEX_AND_EIFS_AND_SUBSEQUENT_BINDING_TO_43S	1	1	387	68	0
REACTOME_ACTIVATION_OF_THE_PRE_REPLICATIVE_COMPLEX	REACTOME_ACTIVATION_OF_THE_PRE_REPLICATIVE_COMPLEX	1	1	387	30	0
REACTOME_ACYL_CHAIN_REMODELLING_OF_PC	REACTOME_ACYL_CHAIN_REMODELLING_OF_PC	1	1	387	22	0
REACTOME_ACYL_CHAIN_REMODELLING_OF_PE	REACTOME_ACYL_CHAIN_REMODELLING_OF_PE	1	1	387	21	0
REACTOME_ACYL_CHAIN_REMODELLING_OF_PG	REACTOME_ACYL_CHAIN_REMODELLING_OF_PG	1	1	387	16	0
REACTOME_ACYL_CHAIN_REMODELLING_OF_PI	REACTOME_ACYL_CHAIN_REMODELLING_OF_PI	1	1	387	15	0
REACTOME_ACYL_CHAIN_REMODELLING_OF_PS	REACTOME_ACYL_CHAIN_REMODELLING_OF_PS	1	1	387	15	0
REACTOME_ADENYLATE_CYCLASE_ACTIVATING_PATHWAY	REACTOME_ADENYLATE_CYCLASE_ACTIVATING_PATHWAY	1	1	387	10	0
REACTOME_ADENYLATE_CYCLASE_INHIBITORY_PATHWAY	REACTOME_ADENYLATE_CYCLASE_INHIBITORY_PATHWAY	1	1	387	13	0
REACTOME_ADP_SIGNALLING_THROUGH_P2RY12	REACTOME_ADP_SIGNALLING_THROUGH_P2RY12	1	1	387	21	0
REACTOME_ADVANCED_GLYCOSYLATION_ENDPRODUCT_RECEPTOR_SIGNALING	REACTOME_ADVANCED_GLYCOSYLATION_ENDPRODUCT_RECEPTOR_SIGNALING	1	1	387	13	0
REACTOME_AKT_PHOSPHORYLATES_TARGETS_IN_THE_CYTOSOL	REACTOME_AKT_PHOSPHORYLATES_TARGETS_IN_THE_CYTOSOL	1	1	387	12	0
REACTOME_ALPHA_LINOLENIC_ACID_ALA_METABOLISM	REACTOME_ALPHA_LINOLENIC_ACID_ALA_METABOLISM	1	1	387	12	0
REACTOME_AMINE_DERIVED_HORMONES	REACTOME_AMINE_DERIVED_HORMONES	1	1	387	15	0
REACTOME_AMINE_LIGAND_BINDING_RECEPTORS	REACTOME_AMINE_LIGAND_BINDING_RECEPTORS	1	1	387	37	0
REACTOME_ANDROGEN_BIOSYNTHESIS	REACTOME_ANDROGEN_BIOSYNTHESIS	1	1	387	10	0
REACTOME_ANTIGEN_PRESENTATION_FOLDING_ASSEMBLY_AND_PEPTIDE_LOADING_OF_CLASS_I_MHC	REACTOME_ANTIGEN_PRESENTATION_FOLDING_ASSEMBLY_AND_PEPTIDE_LOADING_OF_CLASS_I_MHC	1	1	387	21	0
REACTOME_APC_C_CDC20_MEDIATED_DEGRADATION_OF_CYCLIN_B	REACTOME_APC_C_CDC20_MEDIATED_DEGRADATION_OF_CYCLIN_B	1	1	387	20	0
REACTOME_APC_C_CDC20_MEDIATED_DEGRADATION_OF_MITOTIC_PROTEINS	REACTOME_APC_C_CDC20_MEDIATED_DEGRADATION_OF_MITOTIC_PROTEINS	1	1	387	66	0
REACTOME_APC_C_CDH1_MEDIATED_DEGRADATION_OF_CDC20_AND_OTHER_APC_C_CDH1_TARGETED_PROTEINS_IN_LATE_MITOSIS_EARLY_G1	REACTOME_APC_C_CDH1_MEDIATED_DEGRADATION_OF_CDC20_AND_OTHER_APC_C_CDH1_TARGETED_PROTEINS_IN_LATE_MITOSIS_EARLY_G1	1	1	387	65	0
REACTOME_APC_CDC20_MEDIATED_DEGRADATION_OF_NEK2A	REACTOME_APC_CDC20_MEDIATED_DEGRADATION_OF_NEK2A	1	1	387	22	0
REACTOME_APOBEC3G_MEDIATED_RESISTANCE_TO_HIV1_INFECTION	REACTOME_APOBEC3G_MEDIATED_RESISTANCE_TO_HIV1_INFECTION	1	1	387	7	0
REACTOME_APOPTOSIS_INDUCED_DNA_FRAGMENTATION	REACTOME_APOPTOSIS_INDUCED_DNA_FRAGMENTATION	1	1	387	13	0
REACTOME_ARMS_MEDIATED_ACTIVATION	REACTOME_ARMS_MEDIATED_ACTIVATION	1	1	387	17	0
REACTOME_ASPARAGINE_N_LINKED_GLYCOSYLATION	REACTOME_ASPARAGINE_N_LINKED_GLYCOSYLATION	0.428571	1	387	80	1	GFPT2
REACTOME_ASSEMBLY_OF_THE_PRE_REPLICATIVE_COMPLEX	REACTOME_ASSEMBLY_OF_THE_PRE_REPLICATIVE_COMPLEX	1	1	387	64	0
REACTOME_ASSOCIATION_OF_LICENSING_FACTORS_WITH_THE_PRE_REPLICATIVE_COMPLEX	REACTOME_ASSOCIATION_OF_LICENSING_FACTORS_WITH_THE_PRE_REPLICATIVE_COMPLEX	1	1	387	14	0
REACTOME_AUTODEGRADATION_OF_CDH1_BY_CDH1_APC_C	REACTOME_AUTODEGRADATION_OF_CDH1_BY_CDH1_APC_C	1	1	387	57	0
REACTOME_BASE_EXCISION_REPAIR	REACTOME_BASE_EXCISION_REPAIR	1	1	387	19	0
REACTOME_BASE_FREE_SUGAR_PHOSPHATE_REMOVAL_VIA_THE_SINGLE_NUCLEOTIDE_REPLACEMENT_PATHWAY	REACTOME_BASE_FREE_SUGAR_PHOSPHATE_REMOVAL_VIA_THE_SINGLE_NUCLEOTIDE_REPLACEMENT_PATHWAY	1	1	387	10	0
REACTOME_BETA_DEFENSINS	REACTOME_BETA_DEFENSINS	1	1	387	38	0
REACTOME_BILE_ACID_AND_BILE_SALT_METABOLISM	REACTOME_BILE_ACID_AND_BILE_SALT_METABOLISM	1	1	387	27	0
REACTOME_BINDING_AND_ENTRY_OF_HIV_VIRION	REACTOME_BINDING_AND_ENTRY_OF_HIV_VIRION	1	1	387	6	0
REACTOME_BIOLOGICAL_OXIDATIONS	REACTOME_BIOLOGICAL_OXIDATIONS	0.616661	1	387	137	1	CYP27B1
REACTOME_BMAL1_CLOCK_NPAS2_ACTIVATES_CIRCADIAN_EXPRESSION	REACTOME_BMAL1_CLOCK_NPAS2_ACTIVATES_CIRCADIAN_EXPRESSION	1	1	387	34	0
REACTOME_BOTULINUM_NEUROTOXICITY	REACTOME_BOTULINUM_NEUROTOXICITY	1	1	387	18	0
REACTOME_BRANCHED_CHAIN_AMINO_ACID_CATABOLISM	REACTOME_BRANCHED_CHAIN_AMINO_ACID_CATABOLISM	1	1	387	17	0
REACTOME_CA_DEPENDENT_EVENTS	REACTOME_CA_DEPENDENT_EVENTS	1	1	387	28	0
REACTOME_CALNEXIN_CALRETICULIN_CYCLE	REACTOME_CALNEXIN_CALRETICULIN_CYCLE	1	1	387	11	0
REACTOME_CD28_DEPENDENT_PI3K_AKT_SIGNALING	REACTOME_CD28_DEPENDENT_PI3K_AKT_SIGNALING	1	1	387	21	0
REACTOME_CD28_DEPENDENT_VAV1_PATHWAY	REACTOME_CD28_DEPENDENT_VAV1_PATHWAY	1	1	387	11	0
REACTOME_CDC6_ASSOCIATION_WITH_THE_ORC_ORIGIN_COMPLEX	REACTOME_CDC6_ASSOCIATION_WITH_THE_ORC_ORIGIN_COMPLEX	1	1	387	11	0
REACTOME_CDK_MEDIATED_PHOSPHORYLATION_AND_REMOVAL_OF_CDC6	REACTOME_CDK_MEDIATED_PHOSPHORYLATION_AND_REMOVAL_OF_CDC6	1	1	387	47	0
REACTOME_CDT1_ASSOCIATION_WITH_THE_CDC6_ORC_ORIGIN_COMPLEX	REACTOME_CDT1_ASSOCIATION_WITH_THE_CDC6_ORC_ORIGIN_COMPLEX	1	1	387	55	0
REACTOME_CELL_CYCLE_CHECKPOINTS	REACTOME_CELL_CYCLE_CHECKPOINTS	0.543281	1	387	112	1	TP53
REACTOME_CGMP_EFFECTS	REACTOME_CGMP_EFFECTS	1	1	387	19	0
REACTOME_CITRIC_ACID_CYCLE_TCA_CYCLE	REACTOME_CITRIC_ACID_CYCLE_TCA_CYCLE	1	1	387	20	0
REACTOME_CLASS_B_2_SECRETIN_FAMILY_RECEPTORS	REACTOME_CLASS_B_2_SECRETIN_FAMILY_RECEPTORS	0.440447	1	387	83	1	SMO
REACTOME_CLASS_C_3_METABOTROPIC_GLUTAMATE_PHEROMONE_RECEPTORS	REACTOME_CLASS_C_3_METABOTROPIC_GLUTAMATE_PHEROMONE_RECEPTORS	1	1	387	14	0
REACTOME_CLEAVAGE_OF_GROWING_TRANSCRIPT_IN_THE_TERMINATION_REGION_	REACTOME_CLEAVAGE_OF_GROWING_TRANSCRIPT_IN_THE_TERMINATION_REGION_	1	1	387	42	0
REACTOME_CONVERSION_FROM_APC_C_CDC20_TO_APC_C_CDH1_IN_LATE_ANAPHASE	REACTOME_CONVERSION_FROM_APC_C_CDC20_TO_APC_C_CDH1_IN_LATE_ANAPHASE	1	1	387	16	0
REACTOME_COPI_MEDIATED_TRANSPORT	REACTOME_COPI_MEDIATED_TRANSPORT	1	1	387	9	0
REACTOME_CREATION_OF_C4_AND_C2_ACTIVATORS	REACTOME_CREATION_OF_C4_AND_C2_ACTIVATORS	1	1	387	8	0
REACTOME_CREB_PHOSPHORYLATION_THROUGH_THE_ACTIVATION_OF_CAMKII	REACTOME_CREB_PHOSPHORYLATION_THROUGH_THE_ACTIVATION_OF_CAMKII	1	1	387	15	0
REACTOME_CREB_PHOSPHORYLATION_THROUGH_THE_ACTIVATION_OF_RAS	REACTOME_CREB_PHOSPHORYLATION_THROUGH_THE_ACTIVATION_OF_RAS	1	1	387	27	0
REACTOME_CRMPS_IN_SEMA3A_SIGNALING	REACTOME_CRMPS_IN_SEMA3A_SIGNALING	1	1	387	14	0
REACTOME_CROSS_PRESENTATION_OF_SOLUBLE_EXOGENOUS_ANTIGENS_ENDOSOMES	REACTOME_CROSS_PRESENTATION_OF_SOLUBLE_EXOGENOUS_ANTIGENS_ENDOSOMES	1	1	387	47	0
REACTOME_CS_DS_DEGRADATION	REACTOME_CS_DS_DEGRADATION	1	1	387	12	0
REACTOME_CTNNB1_PHOSPHORYLATION_CASCADE	REACTOME_CTNNB1_PHOSPHORYLATION_CASCADE	1	1	387	15	0
REACTOME_CYCLIN_A_B1_ASSOCIATED_EVENTS_DURING_G2_M_TRANSITION	REACTOME_CYCLIN_A_B1_ASSOCIATED_EVENTS_DURING_G2_M_TRANSITION	1	1	387	15	0
REACTOME_CYCLIN_E_ASSOCIATED_EVENTS_DURING_G1_S_TRANSITION_	REACTOME_CYCLIN_E_ASSOCIATED_EVENTS_DURING_G1_S_TRANSITION_	1	1	387	63	0
REACTOME_CYTOSOLIC_SULFONATION_OF_SMALL_MOLECULES	REACTOME_CYTOSOLIC_SULFONATION_OF_SMALL_MOLECULES	1	1	387	14	0
REACTOME_CYTOSOLIC_TRNA_AMINOACYLATION	REACTOME_CYTOSOLIC_TRNA_AMINOACYLATION	1	1	387	24	0
REACTOME_DAG_AND_IP3_SIGNALING	REACTOME_DAG_AND_IP3_SIGNALING	1	1	387	30	0
REACTOME_DARPP_32_EVENTS	REACTOME_DARPP_32_EVENTS	1	1	387	24	0
REACTOME_DCC_MEDIATED_ATTRACTIVE_SIGNALING	REACTOME_DCC_MEDIATED_ATTRACTIVE_SIGNALING	1	1	387	13	0
REACTOME_DEADENYLATION_DEPENDENT_MRNA_DECAY	REACTOME_DEADENYLATION_DEPENDENT_MRNA_DECAY	1	1	387	42	0
REACTOME_DEADENYLATION_OF_MRNA	REACTOME_DEADENYLATION_OF_MRNA	1	1	387	17	0
REACTOME_DEFENSINS	REACTOME_DEFENSINS	1	1	387	47	0
REACTOME_DESTABILIZATION_OF_MRNA_BY_AUF1_HNRNP_D0	REACTOME_DESTABILIZATION_OF_MRNA_BY_AUF1_HNRNP_D0	1	1	387	51	0
REACTOME_DESTABILIZATION_OF_MRNA_BY_BRF1	REACTOME_DESTABILIZATION_OF_MRNA_BY_BRF1	1	1	387	17	0
REACTOME_DESTABILIZATION_OF_MRNA_BY_KSRP	REACTOME_DESTABILIZATION_OF_MRNA_BY_KSRP	1	1	387	17	0
REACTOME_DESTABILIZATION_OF_MRNA_BY_TRISTETRAPROLIN_TTP	REACTOME_DESTABILIZATION_OF_MRNA_BY_TRISTETRAPROLIN_TTP	1	1	387	17	0
REACTOME_DIGESTION_OF_DIETARY_CARBOHYDRATE	REACTOME_DIGESTION_OF_DIETARY_CARBOHYDRATE	1	1	387	9	0
REACTOME_DNA_REPAIR	REACTOME_DNA_REPAIR	1	1	387	103	0
REACTOME_DNA_REPLICATION	REACTOME_DNA_REPLICATION	1	1	387	182	0
REACTOME_DNA_STRAND_ELONGATION	REACTOME_DNA_STRAND_ELONGATION	1	1	387	30	0
REACTOME_DOPAMINE_NEUROTRANSMITTER_RELEASE_CYCLE	REACTOME_DOPAMINE_NEUROTRANSMITTER_RELEASE_CYCLE	1	1	387	11	0
REACTOME_DOUBLE_STRAND_BREAK_REPAIR	REACTOME_DOUBLE_STRAND_BREAK_REPAIR	1	1	387	21	0
REACTOME_DOWNREGULATION_OF_ERBB2_ERBB3_SIGNALING	REACTOME_DOWNREGULATION_OF_ERBB2_ERBB3_SIGNALING	1	1	387	12	0
REACTOME_DOWNREGULATION_OF_SMAD2_3_SMAD4_TRANSCRIPTIONAL_ACTIVITY	REACTOME_DOWNREGULATION_OF_SMAD2_3_SMAD4_TRANSCRIPTIONAL_ACTIVITY	1	1	387	20	0
REACTOME_DOWNREGULATION_OF_TGF_BETA_RECEPTOR_SIGNALING	REACTOME_DOWNREGULATION_OF_TGF_BETA_RECEPTOR_SIGNALING	1	1	387	22	0
REACTOME_DOWNSTREAM_SIGNAL_TRANSDUCTION	REACTOME_DOWNSTREAM_SIGNAL_TRANSDUCTION	0.467208	1	387	90	1	STAT5A
REACTOME_DOWNSTREAM_SIGNALING_EVENTS_OF_B_CELL_RECEPTOR_BCR	REACTOME_DOWNSTREAM_SIGNALING_EVENTS_OF_B_CELL_RECEPTOR_BCR	1	1	387	93	0
REACTOME_DOWNSTREAM_SIGNALING_OF_ACTIVATED_FGFR	REACTOME_DOWNSTREAM_SIGNALING_OF_ACTIVATED_FGFR	0.489127	1	387	96	1	FGFR3
REACTOME_E2F_ENABLED_INHIBITION_OF_PRE_REPLICATION_COMPLEX_FORMATION	REACTOME_E2F_ENABLED_INHIBITION_OF_PRE_REPLICATION_COMPLEX_FORMATION	1	1	387	10	0
REACTOME_E2F_MEDIATED_REGULATION_OF_DNA_REPLICATION	REACTOME_E2F_MEDIATED_REGULATION_OF_DNA_REPLICATION	1	1	387	34	0
REACTOME_EARLY_PHASE_OF_HIV_LIFE_CYCLE	REACTOME_EARLY_PHASE_OF_HIV_LIFE_CYCLE	1	1	387	15	0
REACTOME_EFFECTS_OF_PIP2_HYDROLYSIS	REACTOME_EFFECTS_OF_PIP2_HYDROLYSIS	1	1	387	23	0
REACTOME_ELEVATION_OF_CYTOSOLIC_CA2_LEVELS	REACTOME_ELEVATION_OF_CYTOSOLIC_CA2_LEVELS	1	1	387	8	0
REACTOME_ELONGATION_ARREST_AND_RECOVERY	REACTOME_ELONGATION_ARREST_AND_RECOVERY	1	1	387	24	0
REACTOME_ENDOGENOUS_STEROLS	REACTOME_ENDOGENOUS_STEROLS	1	1	387	15	0
REACTOME_ENDOSOMAL_SORTING_COMPLEX_REQUIRED_FOR_TRANSPORT_ESCRT	REACTOME_ENDOSOMAL_SORTING_COMPLEX_REQUIRED_FOR_TRANSPORT_ESCRT	1	1	387	27	0
REACTOME_ENDOSOMAL_VACUOLAR_PATHWAY	REACTOME_ENDOSOMAL_VACUOLAR_PATHWAY	1	1	387	9	0
REACTOME_ENERGY_DEPENDENT_REGULATION_OF_MTOR_BY_LKB1_AMPK	REACTOME_ENERGY_DEPENDENT_REGULATION_OF_MTOR_BY_LKB1_AMPK	1	1	387	17	0
REACTOME_ER_PHAGOSOME_PATHWAY	REACTOME_ER_PHAGOSOME_PATHWAY	1	1	387	60	0
REACTOME_ERK_MAPK_TARGETS	REACTOME_ERK_MAPK_TARGETS	1	1	387	21	0
REACTOME_ERKS_ARE_INACTIVATED	REACTOME_ERKS_ARE_INACTIVATED	1	1	387	12	0
REACTOME_ETHANOL_OXIDATION	REACTOME_ETHANOL_OXIDATION	1	1	387	10	0
REACTOME_EXTENSION_OF_TELOMERES	REACTOME_EXTENSION_OF_TELOMERES	1	1	387	27	0
REACTOME_FACILITATIVE_NA_INDEPENDENT_GLUCOSE_TRANSPORTERS	REACTOME_FACILITATIVE_NA_INDEPENDENT_GLUCOSE_TRANSPORTERS	1	1	387	12	0
REACTOME_FANCONI_ANEMIA_PATHWAY	REACTOME_FANCONI_ANEMIA_PATHWAY	1	1	387	20	0
REACTOME_FGFR1_LIGAND_BINDING_AND_ACTIVATION	REACTOME_FGFR1_LIGAND_BINDING_AND_ACTIVATION	1	1	387	14	0
REACTOME_FGFR2C_LIGAND_BINDING_AND_ACTIVATION	REACTOME_FGFR2C_LIGAND_BINDING_AND_ACTIVATION	1	1	387	12	0
REACTOME_FGFR4_LIGAND_BINDING_AND_ACTIVATION	REACTOME_FGFR4_LIGAND_BINDING_AND_ACTIVATION	1	1	387	12	0
REACTOME_FORMATION_OF_INCISION_COMPLEX_IN_GG_NER	REACTOME_FORMATION_OF_INCISION_COMPLEX_IN_GG_NER	1	1	387	21	0
REACTOME_FORMATION_OF_RNA_POL_II_ELONGATION_COMPLEX_	REACTOME_FORMATION_OF_RNA_POL_II_ELONGATION_COMPLEX_	1	1	387	36	0
REACTOME_FORMATION_OF_THE_HIV1_EARLY_ELONGATION_COMPLEX	REACTOME_FORMATION_OF_THE_HIV1_EARLY_ELONGATION_COMPLEX	1	1	387	29	0
REACTOME_FORMATION_OF_THE_TERNARY_COMPLEX_AND_SUBSEQUENTLY_THE_43S_COMPLEX	REACTOME_FORMATION_OF_THE_TERNARY_COMPLEX_AND_SUBSEQUENTLY_THE_43S_COMPLEX	1	1	387	60	0
REACTOME_FORMATION_OF_TRANSCRIPTION_COUPLED_NER_TC_NER_REPAIR_COMPLEX	REACTOME_FORMATION_OF_TRANSCRIPTION_COUPLED_NER_TC_NER_REPAIR_COMPLEX	1	1	387	29	0
REACTOME_FORMATION_OF_TUBULIN_FOLDING_INTERMEDIATES_BY_CCT_TRIC	REACTOME_FORMATION_OF_TUBULIN_FOLDING_INTERMEDIATES_BY_CCT_TRIC	1	1	387	21	0
REACTOME_G0_AND_EARLY_G1	REACTOME_G0_AND_EARLY_G1	1	1	387	24	0
REACTOME_G1_PHASE	REACTOME_G1_PHASE	1	1	387	36	0
REACTOME_G1_S_SPECIFIC_TRANSCRIPTION	REACTOME_G1_S_SPECIFIC_TRANSCRIPTION	1	1	387	18	0
REACTOME_G1_S_TRANSITION	REACTOME_G1_S_TRANSITION	1	1	387	108	0
REACTOME_G2_M_CHECKPOINTS	REACTOME_G2_M_CHECKPOINTS	1	1	387	41	0
REACTOME_G2_M_DNA_DAMAGE_CHECKPOINT	REACTOME_G2_M_DNA_DAMAGE_CHECKPOINT	1	1	387	9	0
REACTOME_G_ALPHA_S_SIGNALLING_EVENTS	REACTOME_G_ALPHA_S_SIGNALLING_EVENTS	0.568171	1	387	120	1	MC1R
REACTOME_G_ALPHA_Z_SIGNALLING_EVENTS	REACTOME_G_ALPHA_Z_SIGNALLING_EVENTS	1	1	387	44	0
REACTOME_G_BETA_GAMMA_SIGNALLING_THROUGH_PI3KGAMMA	REACTOME_G_BETA_GAMMA_SIGNALLING_THROUGH_PI3KGAMMA	1	1	387	25	0
REACTOME_G_PROTEIN_ACTIVATION	REACTOME_G_PROTEIN_ACTIVATION	1	1	387	27	0
REACTOME_GABA_A_RECEPTOR_ACTIVATION	REACTOME_GABA_A_RECEPTOR_ACTIVATION	1	1	387	12	0
REACTOME_GABA_B_RECEPTOR_ACTIVATION	REACTOME_GABA_B_RECEPTOR_ACTIVATION	1	1	387	38	0
REACTOME_GABA_RECEPTOR_ACTIVATION	REACTOME_GABA_RECEPTOR_ACTIVATION	1	1	387	52	0
REACTOME_GABA_SYNTHESIS_RELEASE_REUPTAKE_AND_DEGRADATION	REACTOME_GABA_SYNTHESIS_RELEASE_REUPTAKE_AND_DEGRADATION	1	1	387	17	0
REACTOME_GLOBAL_GENOMIC_NER_GG_NER	REACTOME_GLOBAL_GENOMIC_NER_GG_NER	1	1	387	33	0
REACTOME_GLUCAGON_SIGNALING_IN_METABOLIC_REGULATION	REACTOME_GLUCAGON_SIGNALING_IN_METABOLIC_REGULATION	1	1	387	33	0
REACTOME_GLUCAGON_TYPE_LIGAND_RECEPTORS	REACTOME_GLUCAGON_TYPE_LIGAND_RECEPTORS	1	1	387	33	0
REACTOME_GLUCONEOGENESIS	REACTOME_GLUCONEOGENESIS	1	1	387	32	0
REACTOME_GLUCOSE_TRANSPORT	REACTOME_GLUCOSE_TRANSPORT	1	1	387	37	0
REACTOME_GLUCURONIDATION	REACTOME_GLUCURONIDATION	1	1	387	18	0
REACTOME_GLUTAMATE_NEUROTRANSMITTER_RELEASE_CYCLE	REACTOME_GLUTAMATE_NEUROTRANSMITTER_RELEASE_CYCLE	1	1	387	15	0
REACTOME_GLUTATHIONE_CONJUGATION	REACTOME_GLUTATHIONE_CONJUGATION	1	1	387	23	0
REACTOME_GLYCEROPHOSPHOLIPID_BIOSYNTHESIS	REACTOME_GLYCEROPHOSPHOLIPID_BIOSYNTHESIS	0.424557	1	387	79	1	PLD1
REACTOME_GLYCOGEN_BREAKDOWN_GLYCOGENOLYSIS	REACTOME_GLYCOGEN_BREAKDOWN_GLYCOGENOLYSIS	1	1	387	17	0
REACTOME_GLYCOPROTEIN_HORMONES	REACTOME_GLYCOPROTEIN_HORMONES	1	1	387	11	0
REACTOME_GLYCOSPHINGOLIPID_METABOLISM	REACTOME_GLYCOSPHINGOLIPID_METABOLISM	1	1	387	37	0
REACTOME_GOLGI_ASSOCIATED_VESICLE_BIOGENESIS	REACTOME_GOLGI_ASSOCIATED_VESICLE_BIOGENESIS	1	1	387	50	0
REACTOME_GRB2_SOS_PROVIDES_LINKAGE_TO_MAPK_SIGNALING_FOR_INTERGRINS_	REACTOME_GRB2_SOS_PROVIDES_LINKAGE_TO_MAPK_SIGNALING_FOR_INTERGRINS_	1	1	387	15	0
REACTOME_HIGHLY_CALCIUM_PERMEABLE_POSTSYNAPTIC_NICOTINIC_ACETYLCHOLINE_RECEPTORS	REACTOME_HIGHLY_CALCIUM_PERMEABLE_POSTSYNAPTIC_NICOTINIC_ACETYLCHOLINE_RECEPTORS	1	1	387	12	0
REACTOME_HIV_INFECTION	REACTOME_HIV_INFECTION	0.73377	1	387	189	1	AP2M1
REACTOME_HIV_LIFE_CYCLE	REACTOME_HIV_LIFE_CYCLE	1	1	387	109	0
REACTOME_HOMOLOGOUS_RECOMBINATION_REPAIR_OF_REPLICATION_INDEPENDENT_DOUBLE_STRAND_BREAKS	REACTOME_HOMOLOGOUS_RECOMBINATION_REPAIR_OF_REPLICATION_INDEPENDENT_DOUBLE_STRAND_BREAKS	1	1	387	15	0
REACTOME_HORMONE_LIGAND_BINDING_RECEPTORS	REACTOME_HORMONE_LIGAND_BINDING_RECEPTORS	1	1	387	10	0
REACTOME_HOST_INTERACTIONS_OF_HIV_FACTORS	REACTOME_HOST_INTERACTIONS_OF_HIV_FACTORS	0.571186	1	387	121	1	AP2M1
REACTOME_HYALURONAN_METABOLISM	REACTOME_HYALURONAN_METABOLISM	1	1	387	14	0
REACTOME_HYALURONAN_UPTAKE_AND_DEGRADATION	REACTOME_HYALURONAN_UPTAKE_AND_DEGRADATION	1	1	387	10	0
REACTOME_IKK_COMPLEX_RECRUITMENT_MEDIATED_BY_RIP1	REACTOME_IKK_COMPLEX_RECRUITMENT_MEDIATED_BY_RIP1	1	1	387	10	0
REACTOME_IL1_SIGNALING	REACTOME_IL1_SIGNALING	1	1	387	39	0
REACTOME_IL_6_SIGNALING	REACTOME_IL_6_SIGNALING	1	1	387	10	0
REACTOME_IL_RECEPTOR_SHC_SIGNALING	REACTOME_IL_RECEPTOR_SHC_SIGNALING	1	1	387	27	0
REACTOME_INCRETIN_SYNTHESIS_SECRETION_AND_INACTIVATION	REACTOME_INCRETIN_SYNTHESIS_SECRETION_AND_INACTIVATION	1	1	387	20	0
REACTOME_INFLAMMASOMES	REACTOME_INFLAMMASOMES	1	1	387	16	0
REACTOME_INFLUENZA_LIFE_CYCLE	REACTOME_INFLUENZA_LIFE_CYCLE	0.684972	1	387	165	1	RPL10P9
REACTOME_INFLUENZA_VIRAL_RNA_TRANSCRIPTION_AND_REPLICATION	REACTOME_INFLUENZA_VIRAL_RNA_TRANSCRIPTION_AND_REPLICATION	0.602992	1	387	132	1	RPL10P9
REACTOME_INHIBITION_OF_INSULIN_SECRETION_BY_ADRENALINE_NORADRENALINE	REACTOME_INHIBITION_OF_INSULIN_SECRETION_BY_ADRENALINE_NORADRENALINE	1	1	387	25	0
REACTOME_INHIBITION_OF_REPLICATION_INITIATION_OF_DAMAGED_DNA_BY_RB1_E2F1	REACTOME_INHIBITION_OF_REPLICATION_INITIATION_OF_DAMAGED_DNA_BY_RB1_E2F1	1	1	387	12	0
REACTOME_INHIBITION_OF_THE_PROTEOLYTIC_ACTIVITY_OF_APC_C_REQUIRED_FOR_THE_ONSET_OF_ANAPHASE_BY_MITOTIC_SPINDLE_CHECKPOINT_COMPONENTS	REACTOME_INHIBITION_OF_THE_PROTEOLYTIC_ACTIVITY_OF_APC_C_REQUIRED_FOR_THE_ONSET_OF_ANAPHASE_BY_MITOTIC_SPINDLE_CHECKPOINT_COMPONENTS	1	1	387	18	0
REACTOME_INHIBITION_OF_VOLTAGE_GATED_CA2_CHANNELS_VIA_GBETA_GAMMA_SUBUNITS	REACTOME_INHIBITION_OF_VOLTAGE_GATED_CA2_CHANNELS_VIA_GBETA_GAMMA_SUBUNITS	1	1	387	25	0
REACTOME_INSULIN_RECEPTOR_RECYCLING	REACTOME_INSULIN_RECEPTOR_RECYCLING	1	1	387	23	0
REACTOME_INSULIN_RECEPTOR_SIGNALLING_CASCADE	REACTOME_INSULIN_RECEPTOR_SIGNALLING_CASCADE	0.44435	1	387	84	1	FGFR3
REACTOME_INSULIN_SYNTHESIS_AND_PROCESSING	REACTOME_INSULIN_SYNTHESIS_AND_PROCESSING	1	1	387	19	0
REACTOME_INTEGRATION_OF_PROVIRUS	REACTOME_INTEGRATION_OF_PROVIRUS	1	1	387	10	0
REACTOME_INTEGRIN_ALPHAIIB_BETA3_SIGNALING	REACTOME_INTEGRIN_ALPHAIIB_BETA3_SIGNALING	1	1	387	27	0
REACTOME_INTERACTION_BETWEEN_L1_AND_ANKYRINS	REACTOME_INTERACTION_BETWEEN_L1_AND_ANKYRINS	1	1	387	21	0
REACTOME_INTERACTIONS_OF_VPR_WITH_HOST_CELLULAR_PROTEINS	REACTOME_INTERACTIONS_OF_VPR_WITH_HOST_CELLULAR_PROTEINS	1	1	387	31	0
REACTOME_INTRINSIC_PATHWAY	REACTOME_INTRINSIC_PATHWAY	1	1	387	17	0
REACTOME_INWARDLY_RECTIFYING_K_CHANNELS	REACTOME_INWARDLY_RECTIFYING_K_CHANNELS	1	1	387	31	0
REACTOME_IONOTROPIC_ACTIVITY_OF_KAINATE_RECEPTORS	REACTOME_IONOTROPIC_ACTIVITY_OF_KAINATE_RECEPTORS	1	1	387	11	0
REACTOME_IRAK1_RECRUITS_IKK_COMPLEX	REACTOME_IRAK1_RECRUITS_IKK_COMPLEX	1	1	387	10	0
REACTOME_IRAK2_MEDIATED_ACTIVATION_OF_TAK1_COMPLEX_UPON_TLR7_8_OR_9_STIMULATION	REACTOME_IRAK2_MEDIATED_ACTIVATION_OF_TAK1_COMPLEX_UPON_TLR7_8_OR_9_STIMULATION	1	1	387	9	0
REACTOME_JNK_C_JUN_KINASES_PHOSPHORYLATION_AND_ACTIVATION_MEDIATED_BY_ACTIVATED_HUMAN_TAK1	REACTOME_JNK_C_JUN_KINASES_PHOSPHORYLATION_AND_ACTIVATION_MEDIATED_BY_ACTIVATED_HUMAN_TAK1	1	1	387	16	0
REACTOME_KERATAN_SULFATE_BIOSYNTHESIS	REACTOME_KERATAN_SULFATE_BIOSYNTHESIS	1	1	387	25	0
REACTOME_KERATAN_SULFATE_DEGRADATION	REACTOME_KERATAN_SULFATE_DEGRADATION	1	1	387	11	0
REACTOME_KERATAN_SULFATE_KERATIN_METABOLISM	REACTOME_KERATAN_SULFATE_KERATIN_METABOLISM	1	1	387	29	0
REACTOME_KINESINS	REACTOME_KINESINS	1	1	387	24	0
REACTOME_LAGGING_STRAND_SYNTHESIS	REACTOME_LAGGING_STRAND_SYNTHESIS	1	1	387	19	0
REACTOME_LATE_PHASE_OF_HIV_LIFE_CYCLE	REACTOME_LATE_PHASE_OF_HIV_LIFE_CYCLE	1	1	387	94	0
REACTOME_LIGAND_GATED_ION_CHANNEL_TRANSPORT	REACTOME_LIGAND_GATED_ION_CHANNEL_TRANSPORT	1	1	387	21	0
REACTOME_LOSS_OF_NLP_FROM_MITOTIC_CENTROSOMES	REACTOME_LOSS_OF_NLP_FROM_MITOTIC_CENTROSOMES	1	1	387	56	0
REACTOME_LYSOSOME_VESICLE_BIOGENESIS	REACTOME_LYSOSOME_VESICLE_BIOGENESIS	1	1	387	23	0
REACTOME_M_G1_TRANSITION	REACTOME_M_G1_TRANSITION	1	1	387	79	0
REACTOME_MAP_KINASE_ACTIVATION_IN_TLR_CASCADE	REACTOME_MAP_KINASE_ACTIVATION_IN_TLR_CASCADE	1	1	387	49	0
REACTOME_MAPK_TARGETS_NUCLEAR_EVENTS_MEDIATED_BY_MAP_KINASES	REACTOME_MAPK_TARGETS_NUCLEAR_EVENTS_MEDIATED_BY_MAP_KINASES	1	1	387	30	0
REACTOME_MEMBRANE_BINDING_AND_TARGETTING_OF_GAG_PROTEINS	REACTOME_MEMBRANE_BINDING_AND_TARGETTING_OF_GAG_PROTEINS	1	1	387	10	0
REACTOME_METABOLISM_OF_NON_CODING_RNA	REACTOME_METABOLISM_OF_NON_CODING_RNA	1	1	387	48	0
REACTOME_METABOLISM_OF_POLYAMINES	REACTOME_METABOLISM_OF_POLYAMINES	1	1	387	14	0
REACTOME_METABOLISM_OF_PORPHYRINS	REACTOME_METABOLISM_OF_PORPHYRINS	1	1	387	14	0
REACTOME_METABOLISM_OF_VITAMINS_AND_COFACTORS	REACTOME_METABOLISM_OF_VITAMINS_AND_COFACTORS	1	1	387	51	0
REACTOME_METAL_ION_SLC_TRANSPORTERS	REACTOME_METAL_ION_SLC_TRANSPORTERS	1	1	387	22	0
REACTOME_MICRORNA_MIRNA_BIOGENESIS	REACTOME_MICRORNA_MIRNA_BIOGENESIS	1	1	387	18	0
REACTOME_MITOCHONDRIAL_FATTY_ACID_BETA_OXIDATION	REACTOME_MITOCHONDRIAL_FATTY_ACID_BETA_OXIDATION	1	1	387	14	0
REACTOME_MITOCHONDRIAL_TRNA_AMINOACYLATION	REACTOME_MITOCHONDRIAL_TRNA_AMINOACYLATION	1	1	387	21	0
REACTOME_MITOTIC_G1_G1_S_PHASES	REACTOME_MITOTIC_G1_G1_S_PHASES	1	1	387	133	0
REACTOME_MITOTIC_G2_G2_M_PHASES	REACTOME_MITOTIC_G2_G2_M_PHASES	1	1	387	78	0
REACTOME_MITOTIC_M_M_G1_PHASES	REACTOME_MITOTIC_M_M_G1_PHASES	1	1	387	162	0
REACTOME_MITOTIC_PROMETAPHASE	REACTOME_MITOTIC_PROMETAPHASE	1	1	387	79	0
REACTOME_MRNA_3_END_PROCESSING	REACTOME_MRNA_3_END_PROCESSING	1	1	387	33	0
REACTOME_MRNA_CAPPING	REACTOME_MRNA_CAPPING	1	1	387	29	0
REACTOME_MRNA_DECAY_BY_3_TO_5_EXORIBONUCLEASE	REACTOME_MRNA_DECAY_BY_3_TO_5_EXORIBONUCLEASE	1	1	387	11	0
REACTOME_MRNA_DECAY_BY_5_TO_3_EXORIBONUCLEASE	REACTOME_MRNA_DECAY_BY_5_TO_3_EXORIBONUCLEASE	1	1	387	14	0
REACTOME_MRNA_PROCESSING	REACTOME_MRNA_PROCESSING	1	1	387	153	0
REACTOME_MRNA_SPLICING	REACTOME_MRNA_SPLICING	1	1	387	105	0
REACTOME_MRNA_SPLICING_MINOR_PATHWAY	REACTOME_MRNA_SPLICING_MINOR_PATHWAY	1	1	387	41	0
REACTOME_MTORC1_MEDIATED_SIGNALLING	REACTOME_MTORC1_MEDIATED_SIGNALLING	1	1	387	11	0
REACTOME_MYD88_MAL_CASCADE_INITIATED_ON_PLASMA_MEMBRANE	REACTOME_MYD88_MAL_CASCADE_INITIATED_ON_PLASMA_MEMBRANE	1	1	387	82	0
REACTOME_MYOGENESIS	REACTOME_MYOGENESIS	1	1	387	26	0
REACTOME_N_GLYCAN_ANTENNAE_ELONGATION	REACTOME_N_GLYCAN_ANTENNAE_ELONGATION	1	1	387	14	0
REACTOME_N_GLYCAN_ANTENNAE_ELONGATION_IN_THE_MEDIAL_TRANS_GOLGI	REACTOME_N_GLYCAN_ANTENNAE_ELONGATION_IN_THE_MEDIAL_TRANS_GOLGI	1	1	387	18	0
REACTOME_N_GLYCAN_TRIMMING_IN_THE_ER_AND_CALNEXIN_CALRETICULIN_CYCLE	REACTOME_N_GLYCAN_TRIMMING_IN_THE_ER_AND_CALNEXIN_CALRETICULIN_CYCLE	1	1	387	13	0
REACTOME_NEF_MEDIATED_DOWNREGULATION_OF_MHC_CLASS_I_COMPLEX_CELL_SURFACE_EXPRESSION	REACTOME_NEF_MEDIATED_DOWNREGULATION_OF_MHC_CLASS_I_COMPLEX_CELL_SURFACE_EXPRESSION	1	1	387	10	0
REACTOME_NEGATIVE_REGULATION_OF_THE_PI3K_AKT_NETWORK	REACTOME_NEGATIVE_REGULATION_OF_THE_PI3K_AKT_NETWORK	1	1	387	7	0
REACTOME_NEP_NS2_INTERACTS_WITH_THE_CELLULAR_EXPORT_MACHINERY	REACTOME_NEP_NS2_INTERACTS_WITH_THE_CELLULAR_EXPORT_MACHINERY	1	1	387	26	0
REACTOME_NEPHRIN_INTERACTIONS	REACTOME_NEPHRIN_INTERACTIONS	1	1	387	19	0
REACTOME_NETRIN1_SIGNALING	REACTOME_NETRIN1_SIGNALING	1	1	387	38	0
REACTOME_NEUROTRANSMITTER_RELEASE_CYCLE	REACTOME_NEUROTRANSMITTER_RELEASE_CYCLE	1	1	387	34	0
REACTOME_NFKB_ACTIVATION_THROUGH_FADD_RIP1_PATHWAY_MEDIATED_BY_CASPASE_8_AND10	REACTOME_NFKB_ACTIVATION_THROUGH_FADD_RIP1_PATHWAY_MEDIATED_BY_CASPASE_8_AND10	1	1	387	12	0
REACTOME_NFKB_AND_MAP_KINASES_ACTIVATION_MEDIATED_BY_TLR4_SIGNALING_REPERTOIRE	REACTOME_NFKB_AND_MAP_KINASES_ACTIVATION_MEDIATED_BY_TLR4_SIGNALING_REPERTOIRE	1	1	387	71	0
REACTOME_NGF_SIGNALLING_VIA_TRKA_FROM_THE_PLASMA_MEMBRANE	REACTOME_NGF_SIGNALLING_VIA_TRKA_FROM_THE_PLASMA_MEMBRANE	0.605764	1	387	133	1	AP2M1
REACTOME_NITRIC_OXIDE_STIMULATES_GUANYLATE_CYCLASE	REACTOME_NITRIC_OXIDE_STIMULATES_GUANYLATE_CYCLASE	1	1	387	23	0
REACTOME_NOD1_2_SIGNALING_PATHWAY	REACTOME_NOD1_2_SIGNALING_PATHWAY	1	1	387	30	0
REACTOME_NONSENSE_MEDIATED_DECAY_ENHANCED_BY_THE_EXON_JUNCTION_COMPLEX	REACTOME_NONSENSE_MEDIATED_DECAY_ENHANCED_BY_THE_EXON_JUNCTION_COMPLEX	0.616661	1	387	137	1	RPL10P9
REACTOME_NOREPINEPHRINE_NEUROTRANSMITTER_RELEASE_CYCLE	REACTOME_NOREPINEPHRINE_NEUROTRANSMITTER_RELEASE_CYCLE	1	1	387	10	0
REACTOME_NOTCH1_INTRACELLULAR_DOMAIN_REGULATES_TRANSCRIPTION	REACTOME_NOTCH1_INTRACELLULAR_DOMAIN_REGULATES_TRANSCRIPTION	1	1	387	45	0
REACTOME_NOTCH_HLH_TRANSCRIPTION_PATHWAY	REACTOME_NOTCH_HLH_TRANSCRIPTION_PATHWAY	1	1	387	12	0
REACTOME_NUCLEAR_EVENTS_KINASE_AND_TRANSCRIPTION_FACTOR_ACTIVATION	REACTOME_NUCLEAR_EVENTS_KINASE_AND_TRANSCRIPTION_FACTOR_ACTIVATION	1	1	387	24	0
REACTOME_NUCLEOTIDE_BINDING_DOMAIN_LEUCINE_RICH_REPEAT_CONTAINING_RECEPTOR_NLR_SIGNALING_PATHWAYS	REACTOME_NUCLEOTIDE_BINDING_DOMAIN_LEUCINE_RICH_REPEAT_CONTAINING_RECEPTOR_NLR_SIGNALING_PATHWAYS	1	1	387	45	0
REACTOME_NUCLEOTIDE_EXCISION_REPAIR	REACTOME_NUCLEOTIDE_EXCISION_REPAIR	1	1	387	49	0
REACTOME_NUCLEOTIDE_LIKE_PURINERGIC_RECEPTORS	REACTOME_NUCLEOTIDE_LIKE_PURINERGIC_RECEPTORS	1	1	387	16	0
REACTOME_OPIOID_SIGNALLING	REACTOME_OPIOID_SIGNALLING	0.412345	1	387	76	1	PLCB3
REACTOME_OPSINS	REACTOME_OPSINS	1	1	387	10	0
REACTOME_ORC1_REMOVAL_FROM_CHROMATIN	REACTOME_ORC1_REMOVAL_FROM_CHROMATIN	1	1	387	66	0
REACTOME_ORGANIC_CATION_ANION_ZWITTERION_TRANSPORT	REACTOME_ORGANIC_CATION_ANION_ZWITTERION_TRANSPORT	1	1	387	13	0
REACTOME_OXYGEN_DEPENDENT_PROLINE_HYDROXYLATION_OF_HYPOXIA_INDUCIBLE_FACTOR_ALPHA	REACTOME_OXYGEN_DEPENDENT_PROLINE_HYDROXYLATION_OF_HYPOXIA_INDUCIBLE_FACTOR_ALPHA	1	1	387	15	0
REACTOME_P130CAS_LINKAGE_TO_MAPK_SIGNALING_FOR_INTEGRINS	REACTOME_P130CAS_LINKAGE_TO_MAPK_SIGNALING_FOR_INTEGRINS	1	1	387	15	0
REACTOME_P2Y_RECEPTORS	REACTOME_P2Y_RECEPTORS	1	1	387	12	0
REACTOME_P38MAPK_EVENTS	REACTOME_P38MAPK_EVENTS	1	1	387	13	0
REACTOME_P53_INDEPENDENT_G1_S_DNA_DAMAGE_CHECKPOINT	REACTOME_P53_INDEPENDENT_G1_S_DNA_DAMAGE_CHECKPOINT	1	1	387	49	0
REACTOME_PEPTIDE_CHAIN_ELONGATION	REACTOME_PEPTIDE_CHAIN_ELONGATION	0.5559	1	387	116	1	RPL10P9
REACTOME_PEPTIDE_HORMONE_BIOSYNTHESIS	REACTOME_PEPTIDE_HORMONE_BIOSYNTHESIS	1	1	387	13	0
REACTOME_PERK_REGULATED_GENE_EXPRESSION	REACTOME_PERK_REGULATED_GENE_EXPRESSION	1	1	387	27	0
REACTOME_PEROXISOMAL_LIPID_METABOLISM	REACTOME_PEROXISOMAL_LIPID_METABOLISM	1	1	387	21	0
REACTOME_PHASE_II_CONJUGATION	REACTOME_PHASE_II_CONJUGATION	1	1	387	69	0
REACTOME_PHOSPHORYLATION_OF_THE_APC_C	REACTOME_PHOSPHORYLATION_OF_THE_APC_C	1	1	387	17	0
REACTOME_PI3K_AKT_ACTIVATION	REACTOME_PI3K_AKT_ACTIVATION	1	1	387	36	0
REACTOME_PI3K_EVENTS_IN_ERBB4_SIGNALING	REACTOME_PI3K_EVENTS_IN_ERBB4_SIGNALING	1	1	387	36	0
REACTOME_PI_METABOLISM	REACTOME_PI_METABOLISM	1	1	387	47	0
REACTOME_PIP3_ACTIVATES_AKT_SIGNALING	REACTOME_PIP3_ACTIVATES_AKT_SIGNALING	1	1	387	27	0
REACTOME_PKA_MEDIATED_PHOSPHORYLATION_OF_CREB	REACTOME_PKA_MEDIATED_PHOSPHORYLATION_OF_CREB	1	1	387	17	0
REACTOME_PKB_MEDIATED_EVENTS	REACTOME_PKB_MEDIATED_EVENTS	1	1	387	28	0
REACTOME_PLATELET_AGGREGATION_PLUG_FORMATION	REACTOME_PLATELET_AGGREGATION_PLUG_FORMATION	1	1	387	36	0
REACTOME_PLATELET_CALCIUM_HOMEOSTASIS	REACTOME_PLATELET_CALCIUM_HOMEOSTASIS	1	1	387	16	0
REACTOME_PLATELET_HOMEOSTASIS	REACTOME_PLATELET_HOMEOSTASIS	1	1	387	74	0
[truncated: 349 more rows]
