# Supplementary material for: Comprehensive Phenotypic Characterization of Human Invasive Lobular Carcinoma Cell Lines in 2D and 3D Cultures
Source: Oxford University Press journal article supplement (doi:10.1158/0008-5472.can-18-1416), 2018-09-18
Supplement: 00085472can181416-sup-201487_2_supp_5018232_pysyby.xlsx [file 00085472can181416-sup-201487_2_supp_5018232_pysyby.xlsx]

## Sheet: Antibodies
Supplementary Table 1.
List of antibodies used
Antibody	Manufacturer	Catalog Number	Application	Dilution
ER	Cell Signaling	8644	Western Blot	1:1000
PR	Cell Signaling	8757	Western Blot	1:1000
E-Cadherin	BD Biosciences	610182	Western Blot	1:1000
	BD Biosciences	560064	Immunofluorescence	1:100
α-Catenin	Sigma Aldrich	C2081	Western Blot	1:1000
β-Catenin	BD Biosciences	610154	Western Blot	1:1000
p120	BD Biosciences	610134	Western Blot	1:1000
	BD Biosciences	610134	Immunofluorescence	1:500
β-Actin	Sigma-Aldrich	A5441	Western Blot	1:50000
CD24	BD Biociences	561646	FACS
CD44	BD Biosciences	559942	FACS
EPCAM	eBioscience	25-9326-42	FACS
CD49f	eBioscience	17-0495-80	FACS

## Sheet: shRNAs
Supplementary Table 1.
List of shRNAs used
shRNA	Sequence (5'-3')
shPTEN#1	AAGGAACAATATTGATGATGTA
shPTEN#2	ACCAGCTAAAGGTGAAGATATA
shPTEN#3	CCCAGATGTTAGTGACAATGAA
shPTEN#4	CGAGAATGAACCTTTTGATGAA
